# Supplementary material for: International Federation of Clinical Chemistry and Laboratory Medicine: SCIENTIFIC DIVISION: : COMMITTEE ON NOMENCLATURE, PROPERTIES AND UNITS (C-NPU) and INTERNATIONAL UNION OF PURE AND APPLIED CHEMISTRY CHEMISTRY AND HUMAN HEALTH DIVISION(VII) : : Project number 2001-059-1-700: PROPERTIES AND UNITS FOR TRANSFUSION MEDICINE AND IMMUNOHAEMATOLOGY (Technical report) (IFCC-IUPAC 2003)
Source: PubMed Central journal article supplement — EJIFCC. 2004 Mar 23;15(1):10–3. (PMC6043904), 2004-03-23
Supplement: ejifcc-15-S001.pdf [file ejifcc-15-S001.pdf]

## LIST OF PROPERTIES IN TRANSFUSION MEDICINE AND IMMUNOHAEMATOLOGY

|                                                                                                                                                                                                                                                                                                                                                                                                                                    |                                                                                                                                                                                                                                                   |
|------------------------------------------------------------------------------------------------------------------------------------------------------------------------------------------------------------------------------------------------------------------------------------------------------------------------------------------------------------------------------------------------------------------------------------|---------------------------------------------------------------------------------------------------------------------------------------------------------------------------------------------------------------------------------------------------|
| <p><b>Blood—</b><br/> <b>Aberrant cell population(fenotype);</b><br/> <b>taxon</b><br/> <b>NPU21860</b><br/>                     B—Aberrant cell population(fenotype); taxon = ?</p>                                                                                                                                                                                                                                               | <p><b>Blood—</b><br/> <b>B-lymphocytes(immature);</b><br/> <b>number concentration</b><br/> <b>10<sup>9</sup>/litre</b><br/> <b>NPU21821</b><br/>                     B—B-lymphocytes(immature); num.c. = ? × 10<sup>9</sup>/l</p>                |
| <p><b>Bone marrow—</b><br/> <b>Aberrant cell population(fenotype);</b><br/> <b>taxon</b><br/> <b>NPU21864</b><br/>                     Marrow—Aberrant cell population(fenotype); taxon = ?</p>                                                                                                                                                                                                                                    | <p><b>Bone marrow—</b><br/> <b>B-lymphocytes(immature);</b><br/> <b>number concentration</b><br/> <b>10<sup>9</sup>/litre</b><br/> <b>NPU21839</b><br/>                     Marrow—B-lymphocytes(immature); num.c. = ? × 10<sup>9</sup>/l</p>     |
| <p><b>Blood—</b><br/> <b>Aberrant cell population;</b><br/> <b>number concentration</b><br/> <b>10<sup>9</sup>/litre</b><br/> <b>NPU21858</b><br/>                     B—Aberrant cell population; num.c. = ? × 10<sup>9</sup>/l</p>                                                                                                                                                                                               | <p><b>Lymphocytes(Blood)—</b><br/> <b>B-lymphocytes(immature);</b><br/> <b>number fraction</b><br/> <b>NPU21783</b><br/>                     Lymcs(B)—B-lymphocytes(immature); num.fr. = ?</p>                                                    |
| <p><b>Bone marrow—</b><br/> <b>Aberrant cell population;</b><br/> <b>number concentration</b><br/> <b>10<sup>9</sup>/litre</b><br/> <b>NPU21862</b><br/>                     Marrow—Aberrant cell population; num.c. = ? × 10<sup>9</sup>/l</p>                                                                                                                                                                                    | <p><b>Lymphocytes(Bone marrow)—</b><br/> <b>B-lymphocytes(immature);</b><br/> <b>number fraction</b><br/> <b>NPU21802</b><br/>                     Lymcs(Marrow)—B-lymphocytes(immature); num.fr. = ?</p>                                         |
| <p><b>Leukocytes(Blood)—</b><br/> <b>Aberrant cell population;</b><br/> <b>number fraction</b><br/> <b>NPU21859</b><br/>                     Lkcs(B)—Aberrant cell population; num.fr. = ?</p>                                                                                                                                                                                                                                     | <p><b>Blood—</b><br/> <b>B-lymphocytes(mature);</b><br/> <b>number concentration</b><br/> <b>10<sup>9</sup>/litre</b><br/> <b>NPU21820</b><br/>                     B—B-lymphocytes(mature); num.c. = ? × 10<sup>9</sup>/l</p>                    |
| <p><b>Leukocytes(Bone marrow)—</b><br/> <b>Aberrant cell population;</b><br/> <b>number fraction</b><br/> <b>NPU21863</b><br/>                     Lkcs(Marrow)—Aberrant cell population; num.fr. = ?</p>                                                                                                                                                                                                                          | <p><b>Bone marrow—</b><br/> <b>B-lymphocytes(mature);</b><br/> <b>number concentration</b><br/> <b>10<sup>9</sup>/litre</b><br/> <b>NPU21838</b><br/>                     Marrow—B-lymphocytes(mature); num.c. = ? × 10<sup>9</sup>/l</p>         |
| <p><b>Blood—</b><br/> <b>Aberrant cell population;</b><br/> <b>taxon(immunofluorescence)</b><br/> <b>NPU21857</b><br/>                     B—Aberrant cell population; taxon(imm.flu.) = ?</p>                                                                                                                                                                                                                                     | <p><b>Lymphocytes(Blood)—</b><br/> <b>B-lymphocytes(mature);</b><br/> <b>number fraction</b><br/> <b>NPU21782</b><br/>                     Lymcs(B)—B-lymphocytes(mature); num.fr. = ?</p>                                                        |
| <p><b>Bone marrow—</b><br/> <b>Aberrant cell population;</b><br/> <b>taxon(immunofluorescence)</b><br/> <b>NPU21861</b><br/>                     Marrow—Aberrant cell population; taxon(imm.flu.) = ?</p>                                                                                                                                                                                                                          | <p><b>Lymphocytes(Bone marrow)—</b><br/> <b>B-lymphocytes(mature);</b><br/> <b>number fraction</b><br/> <b>NPU21801</b><br/>                     Lymcs(Marrow)—B-lymphocytes(mature); num.fr. = ?</p>                                             |
| <p><b>Culture(Lymphocytes; Blood)—</b><br/> <b>Allogene cells stimulated lymphocytes;</b><br/> <b>relative number concentration(stimulated/unstimulated;</b><br/> <b>procedure)</b><br/>                     Other term(s): mixed leucocyte reaction; MLR<br/> <b>NPU21414</b><br/>                     Culture(Lymcs; B)—Allogene cells stimulated lymphocytes;<br/>                     rel.num.c.(stim./unstim.; proc.) = ?</p> | <p><b>Lymphocytes(Blood)—</b><br/> <b>B-lymphocytes;</b><br/> <b>compatibility(Plasma; donationID; absent present)</b><br/> <b>NPU21409</b><br/>                     Lymcs(B)—B-lymphocytes; compatibility(P; donationID; absent present) = ?</p> |
| <p><b>Plasma—</b><br/> <b>B-lymphocyte antibody;</b><br/> <b>compatibility(donationID; absent present)</b><br/> <b>NPU21410</b><br/>                     P—B-lymphocyte antibody; compatibility(donationID; absent present) = ?</p>                                                                                                                                                                                                | <p><b>Blood—</b><br/> <b>B-lymphocytes;</b><br/> <b>number concentration</b><br/> <b>10<sup>9</sup>/litre</b><br/> <b>NPU21819</b><br/>                     B—B-lymphocytes; num.c. = ? × 10<sup>9</sup>/l</p>                                    |

**Bone marrow—**  
**B-lymphocytes;**  
**number concentration**  
**10<sup>9</sup>/litre**  
**NPU21837**  
Marrow—B-lymphocytes; num.c. = ? × 10<sup>9</sup>/l

**Lymphocytes(Blood)—**  
**B-lymphocytes;**  
**number fraction**  
**NPU21781**  
Lymcs(B)—B-lymphocytes; num.fr. = ?

**Lymphocytes(Bone marrow)—**  
**B-lymphocytes;**  
**number fraction**  
**NPU21800**  
Lymcs(Marrow)—B-lymphocytes; num.fr. = ?

**Culture(Lymphocytes; Blood)—**  
***Candida albicans* stimulated lymphocytes;**  
**relative number concentration(stimulated/unstimulated;**  
**procedure)**  
**NPU21415**  
Culture(Lymcs; B)—*Candida albicans* stimulated lymphocytes;  
rel.num.c.(stim./unstim.; proc.) = ?

**Erythrocytes(Blood)—**  
**Complement C3b;**  
**arbitrary entitic number(procedure)**  
**arbitrary unit**  
**NPU20002**  
Eracs(B)—Complement C3b; arb.entitic num.(proc.) = ? arb.unit

**Neutrophilocytes(Blood)—**  
**Complement C3b;**  
**arbitrary entitic number(procedure)**  
**arbitrary unit**  
**NPU21940**  
Ntrcs(B)—Complement C3b; arb.entitic num.(proc.) = ?  
arb.unit

**Thrombocytes(Blood)—**  
**Complement C3b;**  
**arbitrary entitic number(procedure)**  
**arbitrary unit**  
**NPU20055**  
Tracs(B)—Complement C3b; arb.entitic num.(proc.) = ? arb.unit

**Erythrocytes(Blood)—**  
**Complement C3b;**  
**arbitrary number(procedure)**  
**NPU20026**  
Eracs(B)—Complement C3b; arb.num.(proc.) = ?

**Thrombocytes(Blood)—**  
**Complement C3b;**  
**arbitrary number(procedure)**  
**NPU20044**  
Tracs(B)—Complement C3b; arb.num.(proc.) = ?

**Erythrocytes(Blood)—**  
**Complement C3b;**  
**entitic number**  
**NPU20015**  
Eracs(B)—Complement C3b; entitic num. = ?

**Neutrophilocytes(Blood)—**  
**Complement C3b;**  
**entitic number**  
**NPU21952**  
Ntrcs(B)—Complement C3b; entitic num. = ?

**Thrombocytes(Blood)—**  
**Complement C3b;**  
**entitic number**  
**NPU20066**  
Tracs(B)—Complement C3b; entitic num. = ?

**Erythrocytes(Blood)—**  
**Complement C3d;**  
**arbitrary entitic number(procedure)**  
**arbitrary unit**  
Authority: ICW91  
**NPU01733**  
Eracs(B)—Complement C3d; arb.entitic num.(proc.) = ? arb.unit

**Neutrophilocytes(Blood)—**  
**Complement C3d;**  
**arbitrary entitic number(procedure)**  
**arbitrary unit**  
**NPU21941**  
Ntrcs(B)—Complement C3d; arb.entitic num.(proc.) = ?  
arb.unit

**Thrombocytes(Blood)—**  
**Complement C3d;**  
**arbitrary entitic number(procedure)**  
**arbitrary unit**  
**NPU20056**  
Tracs(B)—Complement C3d; arb.entitic num.(proc.) = ? arb.unit

**Erythrocytes(Blood)—**  
**Complement C3d;**  
**arbitrary number(procedure)**  
**NPU20027**  
Eracs(B)—Complement C3d; arb.num.(proc.) = ?

**Thrombocytes(Blood)—**  
**Complement C3d;**  
**arbitrary number(procedure)**  
**NPU20045**  
Tracs(B)—Complement C3d; arb.num.(proc.) = ?

**Erythrocytes(Blood)—**  
**Complement C3d;**  
**entitic number**  
Authority: ICW91  
**NPU03886**  
Eracs(B)—Complement C3d; entitic num. = ?

**Neutrophilocytes(Blood)—**  
**Complement C3d;**  
**entitic number**  
**NPU21953**  
Ntrcs(B)—Complement C3d; entitic num. = ?

**Thrombocytes(Blood)—**  
**Complement C3d;**  
**entitic number**  
**NPU20067**  
Tracs(B)—Complement C3d; entitic num. = ?

**Erythrocytes(Blood)—  
Complement+Immunoglobulin;  
arbitrary entitic number(list; procedure)**

Other term(s): Coombs test

**NPU20000**

Eracs(B)—Complement+Immunoglobulin; arb.entitic num.(list; proc.)  
NPU20001 Eracs(B)—Complement+Immunoglobulin; arb.entitic num.(proc.) = ? arb.unit  
NPU20002 Eracs(B)—Complement C3b; arb.entitic num.(proc.) = ? arb.unit  
NPU01733 Eracs(B)—Complement C3d; arb.entitic num.(proc.) = ? arb.unit  
NPU20176 Eracs(B)—Immunoglobulin; arb.entitic num.(proc.) = ? arb.unit  
NPU01947 Eracs(B)—Immunoglobulin A; arb.entitic num.(proc.) = ? arb.unit  
NPU20003 Eracs(B)—Immunoglobulin G; arb.entitic num.(proc.) = ? arb.unit  
NPU04066 Eracs(B)—Immunoglobulin G1; arb.entitic num.(proc.) = ? arb.unit  
NPU04067 Eracs(B)—Immunoglobulin G2; arb.entitic num.(proc.) = ? arb.unit  
NPU04068 Eracs(B)—Immunoglobulin G3; arb.entitic num.(proc.) = ? arb.unit  
NPU04069 Eracs(B)—Immunoglobulin G4; arb.entitic num.(proc.) = ? arb.unit  
NPU02487 Eracs(B)—Immunoglobulin M; arb.entitic num.(proc.) = ? arb.unit

**Neutrophilocytes(Blood)—  
Complement+Immunoglobulin;  
arbitrary entitic number(list; procedure)**

**NPU21938**

Ntrcs(B)—Complement+Immunoglobulin; arb.entitic num.(list; proc.)  
NPU21939 Ntrcs(B)—Complement+Immunoglobulin; arb.entitic num.(proc.) = ? arb.unit  
NPU21940 Ntrcs(B)—Complement C3b; arb.entitic num.(proc.) = ? arb.unit  
NPU21941 Ntrcs(B)—Complement C3d; arb.entitic num.(proc.) = ? arb.unit  
NPU21942 Ntrcs(B)—Immunoglobulin; arb.entitic num.(proc.) = ? arb.unit  
NPU21943 Ntrcs(B)—Immunoglobulin A; arb.entitic num.(proc.) = ? arb.unit  
NPU21944 Ntrcs(B)—Immunoglobulin G; arb.entitic num.(proc.) = ? arb.unit  
NPU21945 Ntrcs(B)—Immunoglobulin G1; arb.entitic num.(proc.) = ? arb.unit  
NPU21946 Ntrcs(B)—Immunoglobulin G2; arb.entitic num.(proc.) = ? arb.unit  
NPU21947 Ntrcs(B)—Immunoglobulin G3; arb.entitic num.(proc.) = ? arb.unit  
NPU21948 Ntrcs(B)—Immunoglobulin G4; arb.entitic num.(proc.) = ? arb.unit  
NPU21949 Ntrcs(B)—Immunoglobulin M; arb.entitic num.(proc.) = ? arb.unit

**Thrombocytes(Blood)—  
Complement+Immunoglobulin;  
arbitrary entitic number(list; procedure)**

**NPU20053**

Trcs(B)—Complement+Immunoglobulin; arb.entitic num.(list; proc.)  
NPU20054 Trcs(B)—Complement+Immunoglobulin; arb.entitic num.(proc.) = ? arb.unit  
NPU20055 Trcs(B)—Complement C3b; arb.entitic num.(proc.) = ? arb.unit  
NPU20056 Trcs(B)—Complement C3d; arb.entitic num.(proc.) = ? arb.unit  
NPU20179 Trcs(B)—Immunoglobulin; arb.entitic num.(proc.) = ? arb.unit  
NPU20057 Trcs(B)—Immunoglobulin A; arb.entitic num.(proc.) = ? arb.unit  
NPU20058 Trcs(B)—Immunoglobulin G; arb.entitic num.(proc.) = ? arb.unit  
NPU20059 Trcs(B)—Immunoglobulin G1; arb.entitic num.(proc.) = ? arb.unit  
NPU20060 Trcs(B)—Immunoglobulin G2; arb.entitic num.(proc.) = ? arb.unit  
NPU20061 Trcs(B)—Immunoglobulin G3; arb.entitic num.(proc.) = ? arb.unit  
NPU20062 Trcs(B)—Immunoglobulin G4; arb.entitic num.(proc.) = ? arb.unit  
NPU20063 Trcs(B)—Immunoglobulin M; arb.entitic num.(proc.) = ? arb.unit

**Erythrocytes(Blood)—  
Complement+Immunoglobulin;  
arbitrary entitic number(procedure)  
arbitrary unit**

Other term(s): Coombs test

**NPU20001**

Eracs(B)—Complement+Immunoglobulin; arb.entitic num.(proc.) = ? arb.unit

**Neutrophilocytes(Blood)—  
Complement+Immunoglobulin;  
arbitrary entitic number(procedure)  
arbitrary unit**

**NPU21939**

Ntrcs(B)—Complement+Immunoglobulin; arb.entitic num.(proc.) = ? arb.unit

**Thrombocytes(Blood)—  
Complement+Immunoglobulin;  
arbitrary entitic number(procedure)  
arbitrary unit**

**NPU20054**

Trcs(B)—Complement+Immunoglobulin; arb.entitic num.(proc.) = ? arb.unit

**Erythrocytes(Blood)—  
Complement+Immunoglobulin;  
arbitrary number(list; procedure)**

**NPU20024**

Eracs(B)—Complement+Immunoglobulin; arb.num.(list; proc.)  
NPU20025 Eracs(B)—Complement+Immunoglobulin; arb.num.(proc.) = ?  
NPU20026 Eracs(B)—Complement C3b; arb.num.(proc.) = ?  
NPU20027 Eracs(B)—Complement C3d; arb.num.(proc.) = ?  
NPU20175 Eracs(B)—Immunoglobulin; arb.num.(proc.) = ?  
NPU20028 Eracs(B)—Immunoglobulin A; arb.num.(proc.) = ?  
NPU04070 Eracs(B)—Immunoglobulin G; arb.num.(proc.) = ?  
NPU20030 Eracs(B)—Immunoglobulin G1; arb.num.(proc.) = ?  
NPU20031 Eracs(B)—Immunoglobulin G2; arb.num.(proc.) = ?  
NPU20032 Eracs(B)—Immunoglobulin G3; arb.num.(proc.) = ?  
NPU20033 Eracs(B)—Immunoglobulin G4; arb.num.(proc.) = ?  
NPU20034 Eracs(B)—Immunoglobulin M; arb.num.(proc.) = ?

**Thrombocytes(Blood)—  
Complement+Immunoglobulin;  
arbitrary number(list; procedure)  
NPU20042**  
Trcs(B)—Complement+Immunoglobulin; arb.num.(list; proc.) = ?  
NPU20043 Trcs(B)—Complement+Immunoglobulin;  
arb.num.(proc.) = ?  
NPU20044 Trcs(B)—Complement C3b; arb.num.(proc.) = ?  
NPU20045 Trcs(B)—Complement C3d; arb.num.(proc.) = ?  
NPU20178 Trcs(B)—Immunoglobulin; arb.num.(proc.) = ?  
NPU20046 Trcs(B)—Immunoglobulin A; arb.num.(proc.) = ?  
NPU20047 Trcs(B)—Immunoglobulin G; arb.num.(proc.) = ?  
NPU20048 Trcs(B)—Immunoglobulin G1; arb.num.(proc.) = ?  
NPU20049 Trcs(B)—Immunoglobulin G2; arb.num.(proc.) = ?  
NPU20050 Trcs(B)—Immunoglobulin G3; arb.num.(proc.) = ?  
NPU20051 Trcs(B)—Immunoglobulin G4; arb.num.(proc.) = ?  
NPU20052 Trcs(B)—Immunoglobulin M; arb.num.(proc.) = ?

**Erythrocytes(Blood)—  
Complement+Immunoglobulin;  
arbitrary number(procedure)  
NPU20025**  
ErCs(B)—Complement+Immunoglobulin; arb.num.(proc.) = ?

**Thrombocytes(Blood)—  
Complement+Immunoglobulin;  
arbitrary number(procedure)  
NPU20043**  
Trcs(B)—Complement+Immunoglobulin; arb.num.(proc.) = ?

**Erythrocytes(Blood)—  
Complement+Immunoglobulin;  
entitic number**  
Other term(s): Coombs direct test; Anti globulin reaction  
Authority: ICW91  
**NPU03868**  
ErCs(B)—Complement+Immunoglobulin; entitic num. = ?

**Neutrophilocytes(Blood)—  
Complement+Immunoglobulin;  
entitic number  
NPU21951**  
Ntrcs(B)—Complement+Immunoglobulin; entitic num. = ?

**Thrombocytes(Blood)—  
Complement+Immunoglobulin;  
entitic number  
NPU20065**  
Trcs(B)—Complement+Immunoglobulin; entitic num. = ?

**Erythrocytes(Blood)—  
Complement+Immunoglobulin;  
entitic number(list)  
NPU20013**  
ErCs(B)—Complement+Immunoglobulin; entitic num.(list)  
NPU03868 ErCs(B)—Complement+Immunoglobulin; entitic  
num. = ?  
NPU20015 ErCs(B)—Complement C3b; entitic num. = ?  
NPU03886 ErCs(B)—Complement C3d; entitic num. = ?  
NPU20177 ErCs(B)—Immunoglobulin; entitic num. = ?  
NPU02475 ErCs(B)—Immunoglobulin A; entitic num. = ?  
NPU01948 ErCs(B)—Immunoglobulin G; entitic num. = ?  
NPU01949 ErCs(B)—Immunoglobulin G1; entitic num. = ?  
NPU01950 ErCs(B)—Immunoglobulin G2; entitic num. = ?  
NPU01951 ErCs(B)—Immunoglobulin G3; entitic num. = ?  
NPU01952 ErCs(B)—Immunoglobulin G4; entitic num. = ?  
NPU01953 ErCs(B)—Immunoglobulin M; entitic num. = ?

**Neutrophilocytes(Blood)—  
Complement+Immunoglobulin;  
entitic number(list)  
NPU21950**  
Ntrcs(B)—Complement+Immunoglobulin; entitic num.(list)  
NPU21951 Ntrcs(B)—Complement+Immunoglobulin; entitic  
num. = ?  
NPU21952 Ntrcs(B)—Complement C3b; entitic num. = ?  
NPU21953 Ntrcs(B)—Complement C3d; entitic num. = ?  
NPU21954 Ntrcs(B)—Immunoglobulin; entitic num. = ?  
NPU21955 Ntrcs(B)—Immunoglobulin A; entitic num. = ?  
NPU21956 Ntrcs(B)—Immunoglobulin G; entitic num. = ?  
NPU21957 Ntrcs(B)—Immunoglobulin G1; entitic num. = ?  
NPU21958 Ntrcs(B)—Immunoglobulin G2; entitic num. = ?  
NPU21959 Ntrcs(B)—Immunoglobulin G3; entitic num. = ?  
NPU21960 Ntrcs(B)—Immunoglobulin G4; entitic num. = ?  
NPU21961 Ntrcs(B)—Immunoglobulin M; entitic num. = ?

**Thrombocytes(Blood)—  
Complement+Immunoglobulin;  
entitic number(list)  
NPU20064**  
Trcs(B)—Complement+Immunoglobulin; entitic num.(list)  
NPU20065 Trcs(B)—Complement+Immunoglobulin; entitic  
num. = ?  
NPU20066 Trcs(B)—Complement C3b; entitic num. = ?  
NPU20067 Trcs(B)—Complement C3d; entitic num. = ?  
NPU20180 Trcs(B)—Immunoglobulin; entitic num. = ?  
NPU20068 Trcs(B)—Immunoglobulin A; entitic num. = ?  
NPU20069 Trcs(B)—Immunoglobulin G; entitic num. = ?  
NPU20070 Trcs(B)—Immunoglobulin G1; entitic num. = ?  
NPU20071 Trcs(B)—Immunoglobulin G2; entitic num. = ?  
NPU20072 Trcs(B)—Immunoglobulin G3; entitic num. = ?  
NPU20073 Trcs(B)—Immunoglobulin G4; entitic num. = ?  
NPU20074 Trcs(B)—Immunoglobulin M; entitic num. = ?

**Culture(Lymphocytes; Blood)—  
Concanavalin A stimulated lymphocytes;  
relative number ratio(actual/norm; procedure)  
NPU21422**  
Culture(Lymcs; B)—Concanavalin A stimulated lymphocytes;  
rel.num.ratio(actual/norm; proc.) = ?

**Blood—  
Crossmatch(electronic);  
expiry(date&hour; procedure)  
Other term(s): bac, abc, bas test  
NPU21406**  
B—Crossmatch(elect.); expiry(d&h; proc.) = ?

**Culture(Lymphocytes; Blood)—  
Cytomegalovirus stimulated lymphocytes;  
relative number concentration(stimulated/unstimulated;  
procedure)  
NPU21416**  
Culture(Lymcs; B)—Cytomegalovirus stimulated lymphocytes;  
rel.num.c.(stim./unstim.; proc.) = ?

**Plasma—  
Erythrocyte `N' antibody;  
arbitrary concentration(20 °C; procedure)  
NPU20423**  
P—Erythrocyte `N' antibody; arb.c.(20 °C; proc.) = ?

**Plasma—  
Erythrocyte `N' antibody;  
arbitrary concentration(37 °C; procedure)  
NPU20424**  
P—Erythrocyte `N' antibody; arb.c.(37 °C; proc.) = ?

**Plasma—  
Erythrocyte `N' antibody;  
arbitrary substance concentration(20 °C; procedure)  
arbitrary unit/litre  
NPU20875**  
P—Erythrocyte `N' antibody; arb.subst.c.(20 °C; proc.) = ?  
arb.unit/l

**Plasma—**  
**Erythrocyte `N' antibody;**  
**arbitrary substance concentration(37 °C; procedure)**  
**arbitrary unit/litre**  
**NPU20876**  
P—Erythrocyte `N' antibody; arb.subst.c.(37 °C; proc.) = ?  
arb.unit/l

**Erythrocytes(Blood)—**  
**Erythrocyte `N' antigen;**  
**arbitrary number(procedure)**  
**NPU20201**  
Ercs(B)—Erythrocyte `N' antigen; arb.num.(proc.) = ?

**Plasma—**  
**Erythrocyte A antibody;**  
**arbitrary concentration(20 °C; procedure)**  
**NPU20428**  
P—Erythrocyte A antibody; arb.c.(20 °C; proc.) = ?

**Plasma—**  
**Erythrocyte A antibody;**  
**arbitrary concentration(37 °C; procedure)**  
**NPU20427**  
P—Erythrocyte A antibody; arb.c.(37 °C; proc.) = ?

**Plasma—**  
**Erythrocyte A antibody;**  
**arbitrary substance concentration(20 °C; procedure)**  
**arbitrary unit/litre**  
**NPU20880**  
P—Erythrocyte A antibody; arb.subst.c.(20 °C; proc.) = ?  
arb.unit/l

**Plasma—**  
**Erythrocyte A antibody;**  
**arbitrary substance concentration(37 °C; procedure)**  
**arbitrary unit/litre**  
**NPU20879**  
P—Erythrocyte A antibody; arb.subst.c.(37 °C; proc.) = ?  
arb.unit/l

**Erythrocytes(Blood)—**  
**Erythrocyte A antigen;**  
**arbitrary number(procedure)**  
**NPU21915**  
Ercs(B)—Erythrocyte A antigen; arb.num.(proc.) = ?

**Plasma—**  
**Erythrocyte A1 antibody;**  
**arbitrary concentration(20 °C; procedure)**  
**NPU20425**  
P—Erythrocyte A1 antibody; arb.c.(20 °C; proc.) = ?

**Plasma—**  
**Erythrocyte A1 antibody;**  
**arbitrary concentration(37 °C; procedure)**  
**NPU20426**  
P—Erythrocyte A1 antibody; arb.c.(37 °C; proc.) = ?

**Plasma—**  
**Erythrocyte A1 antibody;**  
**arbitrary substance concentration(20 °C; procedure)**  
**arbitrary unit/litre**  
**NPU20877**  
P—Erythrocyte A1 antibody; arb.subst.c.(20 °C; proc.) = ?  
arb.unit/l

**Plasma—**  
**Erythrocyte A1 antibody;**  
**arbitrary substance concentration(37 °C; procedure)**  
**arbitrary unit/litre**  
**NPU20878**  
P—Erythrocyte A1 antibody; arb.subst.c.(37 °C; proc.) = ?  
arb.unit/l

**Erythrocytes(Blood)—**  
**Erythrocyte A1 antigen;**  
**arbitrary number(procedure)**  
**NPU21914**  
Ercs(B)—Erythrocyte A1 antigen; arb.num.(proc.) = ?

**Plasma—**  
**Erythrocyte ALe<sup>b</sup>antibody;**  
**arbitrary concentration(20 °C; procedure)**  
**NPU20429**  
P—Erythrocyte ALe<sup>b</sup>antibody; arb.c.(20 °C; proc.) = ?

**Plasma—**  
**Erythrocyte ALe<sup>b</sup>antibody;**  
**arbitrary concentration(37 °C; procedure)**  
**NPU20430**  
P—Erythrocyte ALe<sup>b</sup>antibody; arb.c.(37 °C; proc.) = ?

**Plasma—**  
**Erythrocyte ALe<sup>b</sup>antibody;**  
**arbitrary substance concentration(20 °C; procedure)**  
**arbitrary unit/litre**  
**NPU20881**  
P—Erythrocyte ALe<sup>b</sup>antibody; arb.subst.c.(20 °C; proc.) = ?  
arb.unit/l

**Plasma—**  
**Erythrocyte ALe<sup>b</sup>antibody;**  
**arbitrary substance concentration(37 °C; procedure)**  
**arbitrary unit/litre**  
**NPU20882**  
P—Erythrocyte ALe<sup>b</sup>antibody; arb.subst.c.(37 °C; proc.) = ?  
arb.unit/l

**Erythrocytes(Blood)—**  
**Erythrocyte ALe<sup>b</sup>antigen;**  
**arbitrary number(procedure)**  
**NPU20202**  
Ercs(B)—Erythrocyte ALe<sup>b</sup>antigen; arb.num.(proc.) = ?

**Plasma—**  
**Erythrocyte An<sup>a</sup> antibody;**  
**arbitrary concentration(20 °C; procedure)**  
**NPU20431**  
P—Erythrocyte An<sup>a</sup> antibody; arb.c.(20 °C; proc.) = ?

**Plasma—**  
**Erythrocyte An<sup>a</sup> antibody;**  
**arbitrary concentration(37 °C; procedure)**  
**NPU20432**  
P—Erythrocyte An<sup>a</sup> antibody; arb.c.(37 °C; proc.) = ?

**Plasma—**  
**Erythrocyte An<sup>a</sup> antibody;**  
**arbitrary substance concentration(20 °C; procedure)**  
**arbitrary unit/litre**  
**NPU20883**  
P—Erythrocyte An<sup>a</sup> antibody; arb.subst.c.(20 °C; proc.) = ?  
arb.unit/l

**Plasma—**  
**Erythrocyte An<sup>a</sup> antibody;**  
**arbitrary substance concentration(37 °C; procedure)**  
**arbitrary unit/litre**  
**NPU20884**  
P—Erythrocyte An<sup>a</sup> antibody; arb.subst.c.(37 °C; proc.) = ?  
arb.unit/l

**Erythrocytes(Blood)—**  
**Erythrocyte An<sup>a</sup> antigen;**  
**arbitrary number(procedure)**  
**NPU20203**  
Ercs(B)—Erythrocyte An<sup>a</sup> antigen; arb.num.(proc.) = ?

**Plasma—**

**Erythrocyte antibody;  
arbitrary concentration(list)  
NPU21747**

- P—Erythrocyte antibody; arb.c.(list)  
NPU20423 P—Erythrocyte `N` antibody; arb.c.(20 °C; proc.) = ?  
? NPU20424 P—Erythrocyte `N` antibody; arb.c.(37 °C; proc.) = ?  
? NPU20425 P—Erythrocyte A1 antibody; arb.c.(20 °C; proc.) = ?  
? NPU20426 P—Erythrocyte A1 antibody; arb.c.(37 °C; proc.) = ?  
? NPU20428 P—Erythrocyte A antibody; arb.c.(20 °C; proc.) = ?  
? NPU20427 P—Erythrocyte A antibody; arb.c.(37 °C; proc.) = ?  
? NPU20429 P—Erythrocyte ALe<sup>b</sup>antibody; arb.c.(20 °C; proc.) = ?  
? NPU20430 P—Erythrocyte ALe<sup>b</sup>antibody; arb.c.(37 °C; proc.) = ?  
? NPU20431 P—Erythrocyte An<sup>a</sup> antibody; arb.c.(20 °C; proc.) = ?  
? NPU20432 P—Erythrocyte An<sup>a</sup> antibody; arb.c.(37 °C; proc.) = ?  
? NPU20433 P—Erythrocyte Au<sup>a</sup> antibody; arb.c.(20 °C; proc.) = ?  
? NPU20434 P—Erythrocyte Au<sup>a</sup> antibody; arb.c.(37 °C; proc.) = ?  
? NPU20435 P—Erythrocyte Au<sup>b</sup>antibody; arb.c.(20 °C; proc.) = ?  
? NPU20436 P—Erythrocyte Au<sup>b</sup>antibody; arb.c.(37 °C; proc.) = ?  
? NPU20437 P—Erythrocyte B antibody; arb.c.(20 °C; proc.) = ?  
? NPU20438 P—Erythrocyte B antibody; arb.c.(37 °C; proc.) = ?  
? NPU20439 P—Erythrocyte BARC antibody; arb.c.(20 °C; proc.) = ?  
? NPU20440 P—Erythrocyte BARC antibody; arb.c.(37 °C; proc.) = ?  
? NPU20441 P—Erythrocyte Be<sup>a</sup> antibody; arb.c.(20 °C; proc.) = ?  
? NPU20442 P—Erythrocyte Be<sup>a</sup> antibody; arb.c.(37 °C; proc.) = ?  
? NPU20443 P—Erythrocyte BLe<sup>b</sup>antibody; arb.c.(20 °C; proc.) = ?  
? NPU20444 P—Erythrocyte BLe<sup>b</sup>antibody; arb.c.(37 °C; proc.) = ?  
? NPU20445 P—Erythrocyte BOW antibody; arb.c.(20 °C; proc.) = ?  
? NPU20446 P—Erythrocyte BOW antibody; arb.c.(37 °C; proc.) = ?  
? NPU20447 P—Erythrocyte Bp<sup>a</sup> antibody; arb.c.(20 °C; proc.) = ?  
? NPU20448 P—Erythrocyte Bp<sup>a</sup> antibody; arb.c.(37 °C; proc.) = ?  
? NPU20449 P—Erythrocyte C antibody; arb.c.(20 °C; proc.) = ?  
? NPU20450 P—Erythrocyte c antibody; arb.c.(20 °C; proc.) = ?  
? NPU20451 P—Erythrocyte C antibody; arb.c.(37 °C; proc.) = ?  
? NPU20452 P—Erythrocyte c antibody; arb.c.(37 °C; proc.) = ?  
? NPU20453 P—Erythrocyte CD99 antibody; arb.c.(20 °C; proc.) = ?  
? NPU20454 P—Erythrocyte CD99 antibody; arb.c.(37 °C; proc.) = ?  
? NPU20455 P—Erythrocyte Ce antibody; arb.c.(20 °C; proc.) = ?  
? NPU20456 P—Erythrocyte CE antibody; arb.c.(20 °C; proc.) = ?  
? NPU20457 P—Erythrocyte cE antibody; arb.c.(20 °C; proc.) = ?  
? NPU20458 P—Erythrocyte Ce antibody; arb.c.(37 °C; proc.) = ?  
? NPU20459 P—Erythrocyte CE antibody; arb.c.(37 °C; proc.) = ?  
? NPU20460 P—Erythrocyte cE antibody; arb.c.(37 °C; proc.) = ?  
? NPU20461 P—Erythrocyte C<sup>G</sup> antibody; arb.c.(20 °C; proc.) = ?  
? NPU20462 P—Erythrocyte C<sup>G</sup> antibody; arb.c.(37 °C; proc.) = ?  
? NPU20463 P—Erythrocyte Ch1 antibody; arb.c.(20 °C; proc.) = ?  
? NPU20464 P—Erythrocyte Ch1 antibody; arb.c.(37 °C; proc.) = ?  
? NPU20465 P—Erythrocyte Ch2 antibody; arb.c.(20 °C; proc.) = ?  
? NPU20466 P—Erythrocyte Ch2 antibody; arb.c.(37 °C; proc.) = ?  
? NPU20467 P—Erythrocyte Ch3 antibody; arb.c.(20 °C; proc.) = ?  
? NPU20468 P—Erythrocyte Ch3 antibody; arb.c.(37 °C; proc.) = ?  
? NPU20469 P—Erythrocyte Ch4 antibody; arb.c.(20 °C; proc.) = ?  
? NPU20470 P—Erythrocyte Ch4 antibody; arb.c.(37 °C; proc.) = ?  
? NPU20471 P—Erythrocyte Ch5 antibody; arb.c.(20 °C; proc.) = ?  
? NPU20472 P—Erythrocyte Ch5 antibody; arb.c.(37 °C; proc.) = ?  
? NPU20473 P—Erythrocyte Ch6 antibody; arb.c.(20 °C; proc.) = ?  
? NPU20474 P—Erythrocyte Ch6 antibody; arb.c.(37 °C; proc.) = ?  
? NPU20475 P—Erythrocyte Cf<sup>a</sup> antibody; arb.c.(20 °C; proc.) = ?  
? NPU20476 P—Erythrocyte Cf<sup>a</sup> antibody; arb.c.(37 °C; proc.) = ?  
? NPU20477 P—Erythrocyte c-like antibody; arb.c.(20 °C; proc.) = ?  
? NPU20478 P—Erythrocyte c-like antibody; arb.c.(37 °C; proc.) = ?  
? NPU20479 P—Erythrocyte Co3 antibody; arb.c.(20 °C; proc.) = ?  
? NPU20480 P—Erythrocyte Co3 antibody; arb.c.(37 °C; proc.) = ?  
? NPU20481 P—Erythrocyte Co<sup>a</sup> antibody; arb.c.(20 °C; proc.) = ?  
? NPU20482 P—Erythrocyte Co<sup>a</sup> antibody; arb.c.(37 °C; proc.) = ?  
? NPU20483 P—Erythrocyte Co<sup>b</sup>antibody; arb.c.(20 °C; proc.) = ?  
? NPU20484 P—Erythrocyte Co<sup>b</sup>antibody; arb.c.(37 °C; proc.) = ?  
? NPU20485 P—Erythrocyte Cr<sup>a</sup> antibody; arb.c.(20 °C; proc.) = ?  
? NPU20486 P—Erythrocyte Cr<sup>a</sup> antibody; arb.c.(37 °C; proc.) = ?  
? NPU20487 P—Erythrocyte Crawford antibody; arb.c.(20 °C; proc.) = ?  
? NPU20488 P—Erythrocyte Crawford antibody; arb.c.(37 °C; proc.) = ?  
? NPU20489 P—Erythrocyte C<sup>w</sup> antibody; arb.c.(20 °C; proc.) = ?  
? NPU20490 P—Erythrocyte C<sup>w</sup> antibody; arb.c.(37 °C; proc.) = ?  
? NPU20491 P—Erythrocyte C<sup>x</sup> antibody; arb.c.(20 °C; proc.) = ?  
? NPU20492 P—Erythrocyte C<sup>x</sup> antibody; arb.c.(37 °C; proc.) = ?  
? NPU20493 P—Erythrocyte DANE antibody; arb.c.(20 °C; proc.) = ?  
? NPU20494 P—Erythrocyte DANE antibody; arb.c.(37 °C; proc.) = ?  
? NPU20495 P—Erythrocyte D antibody; arb.c.(20 °C; proc.) = ?  
? NPU20496 P—Erythrocyte D antibody; arb.c.(37 °C; proc.) = ?  
? NPU20497 P—Erythrocyte Dantu antibody; arb.c.(20 °C; proc.) = ?  
? NPU20498 P—Erythrocyte Dantu antibody; arb.c.(37 °C; proc.) = ?  
? NPU20499 P—Erythrocyte Dav antibody; arb.c.(20 °C; proc.) = ?  
? NPU20500 P—Erythrocyte Dav antibody; arb.c.(37 °C; proc.) = ?  
? NPU20501 P—Erythrocyte Dh<sup>a</sup> antibody; arb.c.(20 °C; proc.) = ?  
? NPU20502 P—Erythrocyte Dh<sup>a</sup> antibody; arb.c.(37 °C; proc.) = ?

NPU20503 P—Erythrocyte Di<sup>a</sup> antibody; arb.c.(20 °C; proc.) = ?  
 NPU20504 P—Erythrocyte Di<sup>a</sup> antibody; arb.c.(37 °C; proc.) = ?  
 NPU20505 P—Erythrocyte Di<sup>b</sup> antibody; arb.c.(20 °C; proc.) = ?  
 NPU20506 P—Erythrocyte Di<sup>b</sup> antibody; arb.c.(37 °C; proc.) = ?  
 NPU20507 P—Erythrocyte Do<sup>a</sup> antibody; arb.c.(20 °C; proc.) = ?  
 NPU20508 P—Erythrocyte Do<sup>a</sup> antibody; arb.c.(37 °C; proc.) = ?  
 NPU20509 P—Erythrocyte Do<sup>b</sup> antibody; arb.c.(20 °C; proc.) = ?  
 NPU20510 P—Erythrocyte Do<sup>b</sup> antibody; arb.c.(37 °C; proc.) = ?  
 NPU20511 P—Erythrocyte Dr<sup>a</sup> antibody; arb.c.(20 °C; proc.) = ?  
 NPU20512 P—Erythrocyte Dr<sup>a</sup> antibody; arb.c.(37 °C; proc.) = ?  
 NPU20513 P—Erythrocyte D<sup>w</sup> antibody; arb.c.(20 °C; proc.) = ?  
 NPU20514 P—Erythrocyte D<sup>w</sup> antibody; arb.c.(37 °C; proc.) = ?  
 NPU20515 P—Erythrocyte E antibody; arb.c.(20 °C; proc.) = ?  
 NPU20516 P—Erythrocyte e antibody; arb.c.(20 °C; proc.) = ?  
 NPU20517 P—Erythrocyte E antibody; arb.c.(37 °C; proc.) = ?  
 NPU20518 P—Erythrocyte e antibody; arb.c.(37 °C; proc.) = ?  
 NPU20519 P—Erythrocyte ELO antibody; arb.c.(20 °C; proc.) = ?  
 NPU20520 P—Erythrocyte ELO antibody; arb.c.(37 °C; proc.) = ?  
 NPU20521 P—Erythrocyte En<sup>a</sup> antibody; arb.c.(20 °C; proc.) = ?  
 NPU20522 P—Erythrocyte En<sup>a</sup> antibody; arb.c.(37 °C; proc.) = ?  
 NPU20523 P—Erythrocyte ENAV antibody; arb.c.(20 °C; proc.) = ?  
 NPU20524 P—Erythrocyte ENAV antibody; arb.c.(37 °C; proc.) = ?  
 NPU20525 P—Erythrocyte ENEH antibody; arb.c.(20 °C; proc.) = ?  
 NPU20526 P—Erythrocyte ENEH antibody; arb.c.(37 °C; proc.) = ?  
 NPU20527 P—Erythrocyte ENEP antibody; arb.c.(20 °C; proc.) = ?  
 NPU20528 P—Erythrocyte ENEP antibody; arb.c.(37 °C; proc.) = ?  
 NPU20529 P—Erythrocyte ENKT antibody; arb.c.(20 °C; proc.) = ?  
 NPU20530 P—Erythrocyte ENKT antibody; arb.c.(37 °C; proc.) = ?  
 NPU20531 P—Erythrocyte ERIK antibody; arb.c.(20 °C; proc.) = ?  
 NPU20532 P—Erythrocyte ERIK antibody; arb.c.(37 °C; proc.) = ?  
 NPU20533 P—Erythrocyte Es<sup>a</sup> antibody; arb.c.(20 °C; proc.) = ?  
 NPU20534 P—Erythrocyte Es<sup>a</sup> antibody; arb.c.(37 °C; proc.) = ?  
 NPU20535 P—Erythrocyte Evans antibody; arb.c.(20 °C; proc.) = ?  
 NPU20536 P—Erythrocyte Evans antibody; arb.c.(37 °C; proc.) = ?  
 NPU20537 P—Erythrocyte E<sup>w</sup> antibody; arb.c.(20 °C; proc.) = ?  
 NPU20538 P—Erythrocyte E<sup>w</sup> antibody; arb.c.(37 °C; proc.) = ?  
 NPU20539 P—Erythrocyte f antibody; arb.c.(20 °C; proc.) = ?  
 NPU20540 P—Erythrocyte f antibody; arb.c.(37 °C; proc.) = ?  
 NPU20541 P—Erythrocyte Far antibody; arb.c.(20 °C; proc.) = ?  
 NPU20542 P—Erythrocyte Far antibody; arb.c.(37 °C; proc.) = ?  
 NPU20543 P—Erythrocyte FPTT antibody; arb.c.(20 °C; proc.) = ?  
 NPU20544 P—Erythrocyte FPTT antibody; arb.c.(37 °C; proc.) = ?  
 NPU20545 P—Erythrocyte Fr<sup>a</sup> antibody; arb.c.(20 °C; proc.) = ?  
 NPU20546 P—Erythrocyte Fr<sup>a</sup> antibody; arb.c.(37 °C; proc.) = ?  
 NPU20547 P—Erythrocyte Fy3 antibody; arb.c.(20 °C; proc.) = ?  
 NPU20548 P—Erythrocyte Fy3 antibody; arb.c.(37 °C; proc.) = ?  
 NPU20549 P—Erythrocyte Fy4 antibody; arb.c.(20 °C; proc.) = ?  
 NPU20550 P—Erythrocyte Fy4 antibody; arb.c.(37 °C; proc.) = ?  
 NPU20551 P—Erythrocyte Fy5 antibody; arb.c.(20 °C; proc.) = ?  
 NPU20552 P—Erythrocyte Fy5 antibody; arb.c.(37 °C; proc.) = ?  
 NPU20553 P—Erythrocyte Fy6 antibody; arb.c.(20 °C; proc.) = ?  
 NPU20554 P—Erythrocyte Fy6 antibody; arb.c.(37 °C; proc.) = ?  
 NPU20555 P—Erythrocyte Fy<sup>a</sup> antibody; arb.c.(20 °C; proc.) = ?  
 NPU20556 P—Erythrocyte Fy<sup>a</sup> antibody; arb.c.(37 °C; proc.) = ?  
 NPU20557 P—Erythrocyte Fy<sup>b</sup> antibody; arb.c.(20 °C; proc.) = ?  
 NPU20558 P—Erythrocyte Fy<sup>b</sup> antibody; arb.c.(37 °C; proc.) = ?  
 NPU20559 P—Erythrocyte G antibody; arb.c.(20 °C; proc.) = ?  
 NPU20560 P—Erythrocyte G antibody; arb.c.(37 °C; proc.) = ?  
 NPU20561 P—Erythrocyte Ge2 antibody; arb.c.(20 °C; proc.) = ?  
 NPU20562 P—Erythrocyte Ge2 antibody; arb.c.(37 °C; proc.) = ?  
 NPU20563 P—Erythrocyte Ge3 antibody; arb.c.(20 °C; proc.) = ?  
 NPU20564 P—Erythrocyte Ge3 antibody; arb.c.(37 °C; proc.) = ?  
 NPU20565 P—Erythrocyte Ge4 antibody; arb.c.(20 °C; proc.) = ?  
 NPU20566 P—Erythrocyte Ge4 antibody; arb.c.(37 °C; proc.) = ?  
 NPU20567 P—Erythrocyte Go<sup>a</sup> antibody; arb.c.(20 °C; proc.) = ?  
 NPU20568 P—Erythrocyte Go<sup>a</sup> antibody; arb.c.(37 °C; proc.) = ?  
 NPU20569 P—Erythrocyte Gy<sup>a</sup> antibody; arb.c.(20 °C; proc.) = ?  
 NPU20570 P—Erythrocyte Gy<sup>a</sup> antibody; arb.c.(37 °C; proc.) = ?  
 NPU20571 P—Erythrocyte HAG antibody; arb.c.(20 °C; proc.) = ?  
 NPU20572 P—Erythrocyte HAG antibody; arb.c.(37 °C; proc.) = ?  
 NPU20573 P—Erythrocyte H antibody; arb.c.(20 °C; proc.) = ?  
 NPU20574 P—Erythrocyte H antibody; arb.c.(37 °C; proc.) = ?  
 NPU20575 P—Erythrocyte He antibody; arb.c.(20 °C; proc.) = ?  
 NPU20576 P—Erythrocyte He antibody; arb.c.(37 °C; proc.) = ?  
 NPU20577 P—Erythrocyte Hg<sup>a</sup> antibody; arb.c.(20 °C; proc.) = ?  
 NPU20578 P—Erythrocyte Hg<sup>a</sup> antibody; arb.c.(37 °C; proc.) = ?  
 NPU20579 P—Erythrocyte Hil antibody; arb.c.(20 °C; proc.) = ?  
 NPU20580 P—Erythrocyte Hil antibody; arb.c.(37 °C; proc.) = ?  
 NPU20581 P—Erythrocyte Hop antibody; arb.c.(20 °C; proc.) = ?  
 NPU20582 P—Erythrocyte Hop antibody; arb.c.(37 °C; proc.) = ?  
 NPU20583 P—Erythrocyte Hr antibody; arb.c.(20 °C; proc.) = ?  
 NPU20584 P—Erythrocyte Hr antibody; arb.c.(37 °C; proc.) = ?  
 NPU20585 P—Erythrocyte hr<sup>b</sup> antibody; arb.c.(20 °C; proc.) = ?

? NPU20586 P—Erythrocyte Hr<sup>b</sup> antibody; arb.c.(20 °C; proc.) =  
 ? NPU20587 P—Erythrocyte hr<sup>b</sup> antibody; arb.c.(37 °C; proc.) = ?  
 ? NPU20588 P—Erythrocyte Hr<sup>b</sup> antibody; arb.c.(37 °C; proc.) =  
 ? NPU20589 P—Erythrocyte hr<sup>H</sup> antibody; arb.c.(20 °C; proc.) =  
 ? NPU20590 P—Erythrocyte hr<sup>H</sup> antibody; arb.c.(37 °C; proc.) =  
 ? NPU20591 P—Erythrocyte Hr<sub>o</sub> antibody; arb.c.(20 °C; proc.) =  
 ? NPU20592 P—Erythrocyte Hr<sub>o</sub> antibody; arb.c.(37 °C; proc.) =  
 ? NPU20593 P—Erythrocyte hr<sup>S</sup> antibody; arb.c.(20 °C; proc.) =  
 ? NPU20594 P—Erythrocyte hr<sup>S</sup> antibody; arb.c.(37 °C; proc.) =  
 ? NPU20595 P—Erythrocyte Hut antibody; arb.c.(20 °C; proc.) =  
 ? NPU20596 P—Erythrocyte Hut antibody; arb.c.(37 °C; proc.) =  
 ? NPU20597 P—Erythrocyte Hy antibody; arb.c.(20 °C; proc.) =  
 ? NPU20598 P—Erythrocyte Hy antibody; arb.c.(37 °C; proc.) =  
 ? NPU20599 P—Erythrocyte IFC antibody; arb.c.(20 °C; proc.) =  
 ? NPU20600 P—Erythrocyte IFC antibody; arb.c.(37 °C; proc.) =  
 ? NPU20601 P—Erythrocyte In<sup>a</sup> antibody; arb.c.(20 °C; proc.) =  
 ? NPU20602 P—Erythrocyte In<sup>a</sup> antibody; arb.c.(37 °C; proc.) =  
 ? NPU20603 P—Erythrocyte In<sup>b</sup> antibody; arb.c.(20 °C; proc.) = ?  
 ? NPU20604 P—Erythrocyte In<sup>b</sup> antibody; arb.c.(37 °C; proc.) = ?  
 ? NPU20605 P—Erythrocyte JAL antibody; arb.c.(20 °C; proc.) =  
 ? NPU20606 P—Erythrocyte JAL antibody; arb.c.(37 °C; proc.) =  
 ? NPU20607 P—Erythrocyte Jk3 antibody; arb.c.(20 °C; proc.) = ?  
 ? NPU20608 P—Erythrocyte Jk3 antibody; arb.c.(37 °C; proc.) = ?  
 ? NPU20609 P—Erythrocyte Jk<sup>a</sup> antibody; arb.c.(20 °C; proc.) = ?  
 ? NPU20610 P—Erythrocyte Jk<sup>a</sup> antibody; arb.c.(37 °C; proc.) = ?  
 ? NPU20611 P—Erythrocyte Jk<sup>b</sup> antibody; arb.c.(20 °C; proc.) = ?  
 ? NPU20612 P—Erythrocyte Jk<sup>b</sup> antibody; arb.c.(37 °C; proc.) = ?  
 ? NPU20613 P—Erythrocyte Jr<sup>a</sup> antibody; arb.c.(20 °C; proc.) = ?  
 ? NPU20614 P—Erythrocyte Jr<sup>a</sup> antibody; arb.c.(37 °C; proc.) = ?  
 ? NPU20615 P—Erythrocyte Jk<sup>a</sup> antibody; arb.c.(20 °C; proc.) = ?  
 ? NPU20616 P—Erythrocyte Jk<sup>a</sup> antibody; arb.c.(37 °C; proc.) = ?  
 ? NPU20617 P—Erythrocyte Js<sup>a</sup> antibody; arb.c.(20 °C; proc.) = ?  
 ? NPU20618 P—Erythrocyte Js<sup>a</sup> antibody; arb.c.(37 °C; proc.) = ?  
 ? NPU20619 P—Erythrocyte Js<sup>b</sup> antibody; arb.c.(20 °C; proc.) = = ?  
 ? NPU20620 P—Erythrocyte Js<sup>b</sup> antibody; arb.c.(37 °C; proc.) = = ?  
 ? NPU20621 P—Erythrocyte K11 antibody; arb.c.(20 °C; proc.) = ?  
 ? NPU20622 P—Erythrocyte K11 antibody; arb.c.(37 °C; proc.) = ?  
 ? NPU20623 P—Erythrocyte K12 antibody; arb.c.(20 °C; proc.) = ?  
 ? NPU20624 P—Erythrocyte K12 antibody; arb.c.(37 °C; proc.) = ?  
 ? NPU20625 P—Erythrocyte K13 antibody; arb.c.(20 °C; proc.) = ?  
 ? NPU20626 P—Erythrocyte K13 antibody; arb.c.(37 °C; proc.) =  
 ? NPU20627 P—Erythrocyte K14 antibody; arb.c.(20 °C; proc.) =  
 ? NPU20628 P—Erythrocyte K14 antibody; arb.c.(37 °C; proc.) =  
 ? NPU20629 P—Erythrocyte K16 antibody; arb.c.(20 °C; proc.) =  
 ? NPU20630 P—Erythrocyte K16 antibody; arb.c.(37 °C; proc.) =  
 ? NPU20631 P—Erythrocyte K17 antibody; arb.c.(20 °C; proc.) =  
 ? NPU20632 P—Erythrocyte K17 antibody; arb.c.(37 °C; proc.) =  
 ? NPU20633 P—Erythrocyte K18 antibody; arb.c.(20 °C; proc.) =  
 ? NPU20634 P—Erythrocyte K18 antibody; arb.c.(37 °C; proc.) =  
 ? NPU20635 P—Erythrocyte K19 antibody; arb.c.(20 °C; proc.) =  
 ? NPU20636 P—Erythrocyte K19 antibody; arb.c.(37 °C; proc.) =  
 ? NPU20637 P—Erythrocyte K22 antibody; arb.c.(20 °C; proc.) =  
 ? NPU20638 P—Erythrocyte K22 antibody; arb.c.(37 °C; proc.) =  
 ? NPU20639 P—Erythrocyte K23 antibody; arb.c.(20 °C; proc.) =  
 ? NPU20640 P—Erythrocyte K23 antibody; arb.c.(37 °C; proc.) =  
 ? NPU20641 P—Erythrocyte K24 antibody; arb.c.(20 °C; proc.) =  
 ? NPU20642 P—Erythrocyte K24 antibody; arb.c.(37 °C; proc.) =  
 ? NPU20643 P—Erythrocyte K antibody; arb.c.(20 °C; proc.) = ?  
 ? NPU20644 P—Erythrocyte k antibody; arb.c.(20 °C; proc.) = ?  
 ? NPU20645 P—Erythrocyte K antibody; arb.c.(37 °C; proc.) = ?  
 ? NPU20646 P—Erythrocyte k antibody; arb.c.(37 °C; proc.) = ?  
 ? NPU20647 P—Erythrocyte Km antibody; arb.c.(20 °C; proc.) =  
 NPU20648 P—Erythrocyte Km antibody; arb.c.(37 °C; proc.) =  
 NPU20649 P—Erythrocyte Kn<sup>a</sup> antibody; arb.c.(20 °C; proc.) =  
 NPU20650 P—Erythrocyte Kn<sup>a</sup> antibody; arb.c.(37 °C; proc.) =  
 NPU20651 P—Erythrocyte Kn<sup>b</sup> antibody; arb.c.(20 °C; proc.) =  
 NPU20652 P—Erythrocyte Kn<sup>b</sup> antibody; arb.c.(37 °C; proc.) =  
 NPU20653 P—Erythrocyte Kp<sup>a</sup> antibody; arb.c.(20 °C; proc.) =  
 NPU20654 P—Erythrocyte Kp<sup>a</sup> antibody; arb.c.(37 °C; proc.) =  
 NPU20655 P—Erythrocyte Kp<sup>b</sup> antibody; arb.c.(20 °C; proc.) =  
 NPU20656 P—Erythrocyte Kp<sup>b</sup> antibody; arb.c.(37 °C; proc.) =  
 NPU20657 P—Erythrocyte Kp<sup>c</sup> antibody; arb.c.(20 °C; proc.) =  
 NPU20658 P—Erythrocyte Kp<sup>c</sup> antibody; arb.c.(37 °C; proc.) =  
 NPU20659 P—Erythrocyte KREP antibody; arb.c.(20 °C; proc.) =  
 NPU20660 P—Erythrocyte KREP antibody; arb.c.(37 °C; proc.) =  
 NPU20661 P—Erythrocyte Ku antibody; arb.c.(20 °C; proc.) =  
 NPU20662 P—Erythrocyte Ku antibody; arb.c.(37 °C; proc.) =  
 NPU20663 P—Erythrocyte Kx antibody; arb.c.(20 °C; proc.) =  
 NPU20664 P—Erythrocyte Kx antibody; arb.c.(37 °C; proc.) =  
 NPU20665 P—Erythrocyte Le<sup>a</sup> antibody; arb.c.(20 °C; proc.) =

? NPU20666 P—Erythrocyte Le<sup>a</sup> antibody; arb.c.(37 °C; proc.) = ?  
 ? NPU20667 P—Erythrocyte Le<sup>ab</sup> antibody; arb.c.(20 °C; proc.) = ?  
 ? NPU20668 P—Erythrocyte Le<sup>ab</sup> antibody; arb.c.(37 °C; proc.) = ?  
 ? NPU20669 P—Erythrocyte Le<sup>b</sup> antibody; arb.c.(20 °C; proc.) = ?  
 ? NPU20670 P—Erythrocyte Le<sup>b</sup> antibody; arb.c.(37 °C; proc.) = ?  
 = ? NPU20671 P—Erythrocyte Le<sup>bH</sup> antibody; arb.c.(20 °C; proc.) = ?  
 = ? NPU20672 P—Erythrocyte Le<sup>bH</sup> antibody; arb.c.(37 °C; proc.) = ?  
 ? NPU20673 P—Erythrocyte Ls<sup>a</sup> antibody; arb.c.(20 °C; proc.) = ?  
 ? NPU20674 P—Erythrocyte Ls<sup>a</sup> antibody; arb.c.(37 °C; proc.) = ?  
 = ? NPU20675 P—Erythrocyte Lu11 antibody; arb.c.(20 °C; proc.) = ?  
 = ? NPU20676 P—Erythrocyte Lu11 antibody; arb.c.(37 °C; proc.) = ?  
 = ? NPU20677 P—Erythrocyte Lu12 antibody; arb.c.(20 °C; proc.) = ?  
 = ? NPU20678 P—Erythrocyte Lu12 antibody; arb.c.(37 °C; proc.) = ?  
 = ? NPU20679 P—Erythrocyte Lu13 antibody; arb.c.(20 °C; proc.) = ?  
 = ? NPU20680 P—Erythrocyte Lu13 antibody; arb.c.(37 °C; proc.) = ?  
 = ? NPU20681 P—Erythrocyte Lu14 antibody; arb.c.(20 °C; proc.) = ?  
 = ? NPU20682 P—Erythrocyte Lu14 antibody; arb.c.(37 °C; proc.) = ?  
 = ? NPU20683 P—Erythrocyte Lu16 antibody; arb.c.(20 °C; proc.) = ?  
 = ? NPU20684 P—Erythrocyte Lu16 antibody; arb.c.(37 °C; proc.) = ?  
 = ? NPU20685 P—Erythrocyte Lu17 antibody; arb.c.(20 °C; proc.) = ?  
 = ? NPU20686 P—Erythrocyte Lu17 antibody; arb.c.(37 °C; proc.) = ?  
 = ? NPU20687 P—Erythrocyte Lu20 antibody; arb.c.(20 °C; proc.) = ?  
 = ? NPU20688 P—Erythrocyte Lu20 antibody; arb.c.(37 °C; proc.) = ?  
 ? NPU20689 P—Erythrocyte Lu3 antibody; arb.c.(20 °C; proc.) = ?  
 ? NPU20690 P—Erythrocyte Lu3 antibody; arb.c.(37 °C; proc.) = ?  
 ? NPU20691 P—Erythrocyte Lu4 antibody; arb.c.(20 °C; proc.) = ?  
 ? NPU20692 P—Erythrocyte Lu4 antibody; arb.c.(37 °C; proc.) = ?  
 ? NPU20693 P—Erythrocyte Lu5 antibody; arb.c.(20 °C; proc.) = ?  
 ? NPU20694 P—Erythrocyte Lu5 antibody; arb.c.(37 °C; proc.) = ?  
 ? NPU20695 P—Erythrocyte Lu6 antibody; arb.c.(20 °C; proc.) = ?  
 ? NPU20696 P—Erythrocyte Lu6 antibody; arb.c.(37 °C; proc.) = ?  
 ? NPU20697 P—Erythrocyte Lu7 antibody; arb.c.(20 °C; proc.) = ?  
 ? NPU20698 P—Erythrocyte Lu7 antibody; arb.c.(37 °C; proc.) = ?  
 ? NPU20699 P—Erythrocyte Lu8 antibody; arb.c.(20 °C; proc.) = ?  
 ? NPU20700 P—Erythrocyte Lu8 antibody; arb.c.(37 °C; proc.) = ?  
 ? NPU20701 P—Erythrocyte Lu9 antibody; arb.c.(20 °C; proc.) = ?  
 ? NPU20702 P—Erythrocyte Lu9 antibody; arb.c.(37 °C; proc.) = ?  
 ? NPU20703 P—Erythrocyte Lu<sup>a</sup> antibody; arb.c.(20 °C; proc.) = ?  
 ? NPU20704 P—Erythrocyte Lu<sup>a</sup> antibody; arb.c.(37 °C; proc.) = ?  
 ? NPU20705 P—Erythrocyte Lu<sup>b</sup> antibody; arb.c.(20 °C; proc.) = ?  
 ? NPU20706 P—Erythrocyte Lu<sup>b</sup> antibody; arb.c.(37 °C; proc.) = ?  
 ? NPU20707 P—Erythrocyte LW<sup>a</sup> antibody; arb.c.(20 °C; proc.) = ?  
 ? NPU20708 P—Erythrocyte LW<sup>a</sup> antibody; arb.c.(37 °C; proc.) = ?  
 = ? NPU20709 P—Erythrocyte LW<sup>ab</sup> antibody; arb.c.(20 °C; proc.) = ?  
 = ? NPU20710 P—Erythrocyte LW<sup>ab</sup> antibody; arb.c.(37 °C; proc.) = ?  
 ? NPU20711 P—Erythrocyte LW<sup>b</sup> antibody; arb.c.(20 °C; proc.) = ?  
 ? NPU20712 P—Erythrocyte LW<sup>b</sup> antibody; arb.c.(37 °C; proc.) = ?  
 ? NPU20713 P—Erythrocyte M antibody; arb.c.(20 °C; proc.) = ?  
 ? NPU20714 P—Erythrocyte M antibody; arb.c.(37 °C; proc.) = ?  
 = ? NPU20715 P—Erythrocyte MAR antibody; arb.c.(20 °C; proc.) = ?  
 = ? NPU20716 P—Erythrocyte MAR antibody; arb.c.(37 °C; proc.) = ?  
 NPU20717 P—Erythrocyte MARS antibody; arb.c.(20 °C; proc.) = ?  
 NPU20718 P—Erythrocyte MARS antibody; arb.c.(37 °C; proc.) = ?  
 NPU20719 P—Erythrocyte M<sup>c</sup> antibody; arb.c.(20 °C; proc.) = ?  
 ? NPU20720 P—Erythrocyte M<sup>c</sup> antibody; arb.c.(37 °C; proc.) = ?  
 = ? NPU20721 P—Erythrocyte McC<sup>a</sup> antibody; arb.c.(20 °C; proc.) = ?  
 = ? NPU20722 P—Erythrocyte McC<sup>a</sup> antibody; arb.c.(37 °C; proc.) = ?  
 = ? NPU20723 P—Erythrocyte McC<sup>b</sup> antibody; arb.c.(20 °C; proc.) = ?  
 = ? NPU20724 P—Erythrocyte McC<sup>b</sup> antibody; arb.c.(37 °C; proc.) = ?  
 ? NPU20725 P—Erythrocyte M<sup>e</sup> antibody; arb.c.(20 °C; proc.) = ?  
 ? NPU20726 P—Erythrocyte M<sup>e</sup> antibody; arb.c.(37 °C; proc.) = ?  
 ? NPU20727 P—Erythrocyte MER2 antibody; arb.c.(20 °C; proc.) = ?  
 ? NPU20728 P—Erythrocyte MER2 antibody; arb.c.(37 °C; proc.) = ?  
 ? NPU20729 P—Erythrocyte M<sup>G</sup> antibody; arb.c.(20 °C; proc.) = ?  
 ? NPU20730 P—Erythrocyte M<sup>G</sup> antibody; arb.c.(37 °C; proc.) = ?  
 ? NPU20731 P—Erythrocyte Mi<sup>a</sup> antibody; arb.c.(20 °C; proc.) = ?  
 ? NPU20732 P—Erythrocyte Mi<sup>a</sup> antibody; arb.c.(37 °C; proc.) = ?  
 ? NPU20733 P—Erythrocyte MINY antibody; arb.c.(20 °C; proc.) = ?  
 ? NPU20734 P—Erythrocyte MINY antibody; arb.c.(37 °C; proc.) = ?  
 ? NPU20735 P—Erythrocyte Mit antibody; arb.c.(20 °C; proc.) = ?  
 ? NPU20736 P—Erythrocyte Mit antibody; arb.c.(37 °C; proc.) = ?  
 ? NPU20737 P—Erythrocyte Mo<sup>a</sup> antibody; arb.c.(20 °C; proc.) = ?  
 ? NPU20738 P—Erythrocyte Mo<sup>a</sup> antibody; arb.c.(37 °C; proc.) = ?  
 ? NPU20739 P—Erythrocyte Mi<sup>a</sup> antibody; arb.c.(20 °C; proc.) = ?  
 ? NPU20740 P—Erythrocyte Mi<sup>a</sup> antibody; arb.c.(37 °C; proc.) = ?  
 ? NPU20741 P—Erythrocyte Mur antibody; arb.c.(20 °C; proc.) = ?  
 ? NPU20742 P—Erythrocyte Mur antibody; arb.c.(37 °C; proc.) = ?

NPU20743 P—Erythrocyte MUT antibody; arb.c.(20 °C; proc.) = ?  
 NPU20744 P—Erythrocyte MUT antibody; arb.c.(37 °C; proc.) = ?  
 NPU20745 P—Erythrocyte M<sup>v</sup> antibody; arb.c.(20 °C; proc.) = ?  
 NPU20746 P—Erythrocyte M<sup>v</sup> antibody; arb.c.(37 °C; proc.) = ?  
 NPU20747 P—Erythrocyte N antibody; arb.c.(20 °C; proc.) = ?  
 NPU20748 P—Erythrocyte N antibody; arb.c.(37 °C; proc.) = ?  
 NPU20749 P—Erythrocyte NFLD antibody; arb.c.(20 °C; proc.) = ?  
 NPU20750 P—Erythrocyte NFLD antibody; arb.c.(37 °C; proc.) = ?  
 NPU20751 P—Erythrocyte Nob antibody; arb.c.(20 °C; proc.) = ?  
 NPU20752 P—Erythrocyte Nob antibody; arb.c.(37 °C; proc.) = ?  
 NPU20753 P—Erythrocyte Nou antibody; arb.c.(20 °C; proc.) = ?  
 NPU20754 P—Erythrocyte Nou antibody; arb.c.(37 °C; proc.) = ?  
 NPU20755 P—Erythrocyte Ny<sup>a</sup> antibody; arb.c.(20 °C; proc.) = ?  
 NPU20756 P—Erythrocyte Ny<sup>a</sup> antibody; arb.c.(37 °C; proc.) = ?  
 NPU20757 P—Erythrocyte Ok<sup>a</sup> antibody; arb.c.(20 °C; proc.) = ?  
 NPU20758 P—Erythrocyte Ok<sup>a</sup> antibody; arb.c.(37 °C; proc.) = ?  
 NPU20759 P—Erythrocyte Or antibody; arb.c.(20 °C; proc.) = ?  
 NPU20760 P—Erythrocyte Or antibody; arb.c.(37 °C; proc.) = ?  
 NPU20761 P—Erythrocyte Os<sup>a</sup> antibody; arb.c.(20 °C; proc.) = ?  
 NPU20762 P—Erythrocyte Os<sup>a</sup> antibody; arb.c.(37 °C; proc.) = ?  
 NPU20763 P—Erythrocyte P1 antibody; arb.c.(20 °C; proc.) = ?  
 NPU20764 P—Erythrocyte P1 antibody; arb.c.(37 °C; proc.) = ?  
 NPU20765 P—Erythrocyte Rb<sup>a</sup> antibody; arb.c.(20 °C; proc.) = ?  
 NPU20766 P—Erythrocyte Rb<sup>a</sup> antibody; arb.c.(37 °C; proc.) = ?  
 NPU20767 P—Erythrocyte Rg1 antibody; arb.c.(20 °C; proc.) = ?  
 NPU20768 P—Erythrocyte Rg1 antibody; arb.c.(37 °C; proc.) = ?  
 NPU20769 P—Erythrocyte Rg2 antibody; arb.c.(20 °C; proc.) = ?  
 NPU20770 P—Erythrocyte Rg2 antibody; arb.c.(37 °C; proc.) = ?  
 NPU20771 P—Erythrocyte Rh29 antibody; arb.c.(20 °C; proc.) = ?  
 NPU20772 P—Erythrocyte Rh29 antibody; arb.c.(37 °C; proc.) = ?  
 NPU20773 P—Erythrocyte Rh32 antibody; arb.c.(20 °C; proc.) = ?  
 NPU20774 P—Erythrocyte Rh32 antibody; arb.c.(37 °C; proc.) = ?  
 NPU20775 P—Erythrocyte Rh33 antibody; arb.c.(20 °C; proc.) = ?  
 NPU20776 P—Erythrocyte Rh33 antibody; arb.c.(37 °C; proc.) = ?  
 NPU20777 P—Erythrocyte Rh35 antibody; arb.c.(20 °C; proc.) = ?  
 NPU20778 P—Erythrocyte Rh35 antibody; arb.c.(37 °C; proc.) = ?  
 NPU20779 P—Erythrocyte Rh39 antibody; arb.c.(20 °C; proc.) = ?  
 NPU20780 P—Erythrocyte Rh39 antibody; arb.c.(37 °C; proc.) = ?  
 NPU20781 P—Erythrocyte Rh41 antibody; arb.c.(20 °C; proc.) = ?  
 NPU20782 P—Erythrocyte Rh41 antibody; arb.c.(37 °C; proc.) = ?  
 NPU20783 P—Erythrocyte Rh42 antibody; arb.c.(20 °C; proc.) = ?  
 NPU20784 P—Erythrocyte Rh42 antibody; arb.c.(37 °C; proc.) = ?  
 NPU20785 P—Erythrocyte Ri<sup>a</sup> antibody; arb.c.(20 °C; proc.) = ?  
 NPU20786 P—Erythrocyte Ri<sup>a</sup> antibody; arb.c.(37 °C; proc.) = ?  
 NPU20787 P—Erythrocyte Riv antibody; arb.c.(20 °C; proc.) = ?  
 NPU20788 P—Erythrocyte Riv antibody; arb.c.(37 °C; proc.) = ?  
 NPU20789 P—Erythrocyte S antibody; arb.c.(20 °C; proc.) = ?  
 NPU20790 P—Erythrocyte s antibody; arb.c.(20 °C; proc.) = ?  
 NPU20791 P—Erythrocyte S antibody; arb.c.(37 °C; proc.) = ?  
 NPU20792 P—Erythrocyte s antibody; arb.c.(37 °C; proc.) = ?  
 NPU20793 P—Erythrocyte SAT antibody; arb.c.(20 °C; proc.) = ?  
 NPU20794 P—Erythrocyte SAT antibody; arb.c.(37 °C; proc.) = ?  
 NPU20795 P—Erythrocyte Sc1 antibody; arb.c.(20 °C; proc.) = ?  
 NPU20796 P—Erythrocyte Sc1 antibody; arb.c.(37 °C; proc.) = ?  
 NPU20797 P—Erythrocyte Sc2 antibody; arb.c.(20 °C; proc.) = ?  
 NPU20798 P—Erythrocyte Sc2 antibody; arb.c.(37 °C; proc.) = ?  
 NPU20799 P—Erythrocyte Sc3 antibody; arb.c.(20 °C; proc.) = ?  
 NPU20800 P—Erythrocyte Sc3 antibody; arb.c.(37 °C; proc.) = ?  
 NPU20801 P—Erythrocyte s<sup>D</sup> antibody; arb.c.(20 °C; proc.) = ?  
 NPU20802 P—Erythrocyte s<sup>D</sup> antibody; arb.c.(37 °C; proc.) = ?  
 NPU20803 P—Erythrocyte Sec antibody; arb.c.(20 °C; proc.) = ?  
 NPU20804 P—Erythrocyte Sec antibody; arb.c.(37 °C; proc.) = ?  
 NPU20805 P—Erythrocyte Sl<sup>a</sup> antibody; arb.c.(20 °C; proc.) = ?  
 NPU20806 P—Erythrocyte Sl<sup>a</sup> antibody; arb.c.(37 °C; proc.) = ?  
 NPU20807 P—Erythrocyte St<sup>a</sup> antibody; arb.c.(20 °C; proc.) = ?  
 NPU20808 P—Erythrocyte St<sup>a</sup> antibody; arb.c.(37 °C; proc.) = ?  
 NPU20809 P—Erythrocyte STEM antibody; arb.c.(20 °C; proc.) = ?  
 NPU20810 P—Erythrocyte STEM antibody; arb.c.(37 °C; proc.) = ?  
 NPU20811 P—Erythrocyte SW1 antibody; arb.c.(20 °C; proc.) = ?  
 NPU20812 P—Erythrocyte SW1 antibody; arb.c.(37 °C; proc.) = ?  
 NPU20813 P—Erythrocyte Sw<sup>a</sup> antibody; arb.c.(20 °C; proc.) = ?  
 NPU20814 P—Erythrocyte Sw<sup>a</sup> antibody; arb.c.(37 °C; proc.) = ?  
 NPU20815 P—Erythrocyte Tar antibody; arb.c.(20 °C; proc.) = ?  
 NPU20816 P—Erythrocyte Tar antibody; arb.c.(37 °C; proc.) = ?  
 NPU20817 P—Erythrocyte Tc<sup>a</sup> antibody; arb.c.(20 °C; proc.) = ?  
 NPU20818 P—Erythrocyte Tc<sup>a</sup> antibody; arb.c.(37 °C; proc.) = ?  
 NPU20819 P—Erythrocyte Tc<sup>b</sup> antibody; arb.c.(20 °C; proc.) = ?  
 NPU20820 P—Erythrocyte Tc<sup>b</sup> antibody; arb.c.(37 °C; proc.) = ?  
 NPU20821 P—Erythrocyte Tc<sup>c</sup> antibody; arb.c.(20 °C; proc.) = ?

NPU20822 P—Erythrocyte Tc<sup>c</sup> antibody; arb.c.(37 °C; proc.) =  
 ?  
 NPU20823 P—Erythrocyte TOU antibody; arb.c.(20 °C; proc.) =  
 = ?  
 NPU20824 P—Erythrocyte TOU antibody; arb.c.(37 °C; proc.) =  
 = ?  
 NPU20825 P—Erythrocyte Tr<sup>a</sup> antibody; arb.c.(20 °C; proc.) =  
 ?  
 NPU20826 P—Erythrocyte Tr<sup>a</sup> antibody; arb.c.(37 °C; proc.) =  
 ?  
 NPU20827 P—Erythrocyte TSEN antibody; arb.c.(20 °C; proc.) =  
 = ?  
 NPU20828 P—Erythrocyte TSEN antibody; arb.c.(37 °C; proc.) =  
 = ?  
 NPU20829 P—Erythrocyte U antibody; arb.c.(20 °C; proc.) = ?  
 NPU20830 P—Erythrocyte U antibody; arb.c.(37 °C; proc.) = ?  
 NPU20831 P—Erythrocyte Ul<sup>a</sup> antibody; arb.c.(20 °C; proc.) =  
 ?  
 NPU20832 P—Erythrocyte Ul<sup>a</sup> antibody; arb.c.(37 °C; proc.) =  
 ?  
 NPU20833 P—Erythrocyte UMC antibody; arb.c.(20 °C; proc.) =  
 = ?  
 NPU20834 P—Erythrocyte UMC antibody; arb.c.(37 °C; proc.) =  
 = ?  
 NPU20835 P—Erythrocyte V antibody; arb.c.(20 °C; proc.) = ?  
 NPU20836 P—Erythrocyte V antibody; arb.c.(37 °C; proc.) = ?  
 NPU20837 P—Erythrocyte Vg<sup>a</sup> antibody; arb.c.(20 °C; proc.) =  
 ?  
 NPU20838 P—Erythrocyte Vg<sup>a</sup> antibody; arb.c.(37 °C; proc.) =  
 ?  
 NPU20839 P—Erythrocyte Vil antibody; arb.c.(20 °C; proc.) =  
 ?  
 NPU20840 P—Erythrocyte Vil antibody; arb.c.(37 °C; proc.) =  
 ?  
 NPU20841 P—Erythrocyte VLAN antibody; arb.c.(20 °C; proc.) =  
 = ?  
 NPU20842 P—Erythrocyte VLAN antibody; arb.c.(37 °C; proc.) =  
 = ?  
 NPU20843 P—Erythrocyte Vr antibody; arb.c.(20 °C; proc.) = ?  
 NPU20844 P—Erythrocyte Vr antibody; arb.c.(37 °C; proc.) = ?  
 NPU20845 P—Erythrocyte VS antibody; arb.c.(20 °C; proc.) =  
 ?  
 NPU20846 P—Erythrocyte VS antibody; arb.c.(37 °C; proc.) =  
 ?  
 NPU20847 P—Erythrocyte Vw antibody; arb.c.(20 °C; proc.) =  
 ?  
 NPU20848 P—Erythrocyte Vw antibody; arb.c.(37 °C; proc.) =  
 ?  
 NPU20849 P—Erythrocyte WARR antibody; arb.c.(20 °C;  
 proc.) = ?  
 NPU20850 P—Erythrocyte WARR antibody; arb.c.(37 °C;  
 proc.) = ?  
 NPU20851 P—Erythrocyte Wb antibody; arb.c.(20 °C; proc.) =  
 ?  
 NPU20852 P—Erythrocyte Wb antibody; arb.c.(37 °C; proc.) =  
 ?  
 NPU20853 P—Erythrocyte Wd<sup>a</sup> antibody; arb.c.(20 °C; proc.) =  
 ?  
 NPU20854 P—Erythrocyte Wd<sup>a</sup> antibody; arb.c.(37 °C; proc.) =  
 ?  
 NPU20855 P—Erythrocyte WES<sup>a</sup> antibody; arb.c.(20 °C; proc.) =  
 = ?  
 NPU20856 P—Erythrocyte WES<sup>a</sup> antibody; arb.c.(37 °C; proc.) =  
 = ?  
 NPU20857 P—Erythrocyte WES<sup>b</sup> antibody; arb.c.(20 °C; proc.) =  
 = ?  
 NPU20858 P—Erythrocyte WES<sup>b</sup> antibody; arb.c.(37 °C; proc.) =  
 = ?  
 NPU20859 P—Erythrocyte WH antibody; arb.c.(20 °C; proc.) =  
 ?  
 NPU20860 P—Erythrocyte WH antibody; arb.c.(37 °C; proc.) =  
 ?  
 NPU20861 P—Erythrocyte Wr<sup>a</sup> antibody; arb.c.(20 °C; proc.) =  
 ?  
 NPU20862 P—Erythrocyte Wr<sup>a</sup> antibody; arb.c.(37 °C; proc.) =  
 ?

NPU20863 P—Erythrocyte Wr<sup>b</sup> antibody; arb.c.(20 °C; proc.) =  
 ?  
 NPU20864 P—Erythrocyte Wr<sup>b</sup> antibody; arb.c.(37 °C; proc.) =  
 ?  
 NPU20865 P—Erythrocyte Wu antibody; arb.c.(20 °C; proc.) =  
 ?  
 NPU20866 P—Erythrocyte Wu antibody; arb.c.(37 °C; proc.) =  
 ?  
 NPU20867 P—Erythrocyte Xg<sup>a</sup> antibody; arb.c.(20 °C; proc.) =  
 ?  
 NPU20868 P—Erythrocyte Xg<sup>a</sup> antibody; arb.c.(37 °C; proc.) =  
 ?  
 NPU20869 P—Erythrocyte Yk<sup>a</sup> antibody; arb.c.(20 °C; proc.) =  
 ?  
 NPU20870 P—Erythrocyte Yk<sup>a</sup> antibody; arb.c.(37 °C; proc.) =  
 ?  
 NPU20871 P—Erythrocyte Yt<sup>a</sup> antibody; arb.c.(20 °C; proc.) =  
 ?  
 NPU20872 P—Erythrocyte Yt<sup>a</sup> antibody; arb.c.(37 °C; proc.) =  
 ?  
 NPU20873 P—Erythrocyte Yt<sup>b</sup> antibody; arb.c.(20 °C; proc.) = ?  
 NPU20874 P—Erythrocyte Yt<sup>b</sup> antibody; arb.c.(37 °C; proc.) = ?

**Plasma—**  
**Erythrocyte antibody;**  
**compatibility(donationID; absent present)**  
**NPU21913**  
 P—Erythrocyte antibody; compatibility(donationID; absent  
 present) = ?

**Erythrocytes(Blood)—**

**Erythrocyte antigen;  
arbitrary number(list; procedure)**

**NPU20200**

ErCs(B)—Erythrocyte antigen; arb.num.(list; proc.)

NPU20201 ErCs(B)—Erythrocyte 'N' antigen; arb.num.(proc.) = ?

NPU21914 ErCs(B)—Erythrocyte A1 antigen; arb.num.(proc.) = ?

NPU21915 ErCs(B)—Erythrocyte A antigen; arb.num.(proc.) = ?

NPU20202 ErCs(B)—Erythrocyte ALe<sup>b</sup> antigen; arb.num.(proc.) = ?

NPU20203 ErCs(B)—Erythrocyte An<sup>a</sup> antigen; arb.num.(proc.) = ?

NPU20204 ErCs(B)—Erythrocyte Au<sup>a</sup> antigen; arb.num.(proc.) = ?

NPU20205 ErCs(B)—Erythrocyte Au<sup>b</sup> antigen; arb.num.(proc.) = ?

NPU21916 ErCs(B)—Erythrocyte B antigen; arb.num.(proc.) = ?

NPU20206 ErCs(B)—Erythrocyte BARC antigen; arb.num.(proc.) = ?

NPU20207 ErCs(B)—Erythrocyte Be<sup>a</sup> antigen; arb.num.(proc.) = ?

NPU20208 ErCs(B)—Erythrocyte BLe<sup>b</sup> antigen; arb.num.(proc.) = ?

NPU20209 ErCs(B)—Erythrocyte BOW antigen; arb.num.(proc.) = ?

NPU20210 ErCs(B)—Erythrocyte Bp<sup>a</sup> antigen; arb.num.(proc.) = ?

NPU20211 ErCs(B)—Erythrocyte C antigen; arb.num.(proc.) = ?

NPU20212 ErCs(B)—Erythrocyte c antigen; arb.num.(proc.) = ?

NPU20213 ErCs(B)—Erythrocyte CD99 antigen; arb.num.(proc.) = ?

NPU20214 ErCs(B)—Erythrocyte Ce antigen; arb.num.(proc.) = ?

NPU20215 ErCs(B)—Erythrocyte CE antigen; arb.num.(proc.) = ?

NPU20216 ErCs(B)—Erythrocyte cE antigen; arb.num.(proc.) = ?

NPU20217 ErCs(B)—Erythrocyte C<sup>G</sup> antigen; arb.num.(proc.) = ?

NPU20218 ErCs(B)—Erythrocyte Ch1 antigen; arb.num.(proc.) = ?

NPU20219 ErCs(B)—Erythrocyte Ch2 antigen; arb.num.(proc.) = ?

NPU20220 ErCs(B)—Erythrocyte Ch3 antigen; arb.num.(proc.) = ?

NPU20221 ErCs(B)—Erythrocyte Ch4 antigen; arb.num.(proc.) = ?

NPU20222 ErCs(B)—Erythrocyte Ch5 antigen; arb.num.(proc.) = ?

NPU20223 ErCs(B)—Erythrocyte Ch6 antigen; arb.num.(proc.) = ?

NPU20224 ErCs(B)—Erythrocyte Cl<sup>a</sup> antigen; arb.num.(proc.) = ?

NPU20225 ErCs(B)—Erythrocyte c-like antigen; arb.num.(proc.) = ?

NPU20226 ErCs(B)—Erythrocyte Co3 antigen; arb.num.(proc.) = ?

NPU20227 ErCs(B)—Erythrocyte Co<sup>a</sup> antigen; arb.num.(proc.) = ?

NPU20228 ErCs(B)—Erythrocyte Co<sup>b</sup> antigen; arb.num.(proc.) = ?

NPU20229 ErCs(B)—Erythrocyte Cr<sup>a</sup> antigen; arb.num.(proc.) = ?

NPU20230 ErCs(B)—Erythrocyte Crawford antigen; arb.num.(proc.) = ?

NPU20231 ErCs(B)—Erythrocyte C<sup>w</sup> antigen; arb.num.(proc.) = ?

NPU20232 ErCs(B)—Erythrocyte C<sup>x</sup> antigen; arb.num.(proc.) = ?

NPU20233 ErCs(B)—Erythrocyte DANE antigen; arb.num.(proc.) = ?

NPU21917 ErCs(B)—Erythrocyte D antigen; arb.num.(proc.) = ?

NPU20234 ErCs(B)—Erythrocyte Dantu antigen; arb.num.(proc.) = ?

NPU20235 ErCs(B)—Erythrocyte Dav antigen; arb.num.(proc.) = ?

NPU20236 ErCs(B)—Erythrocyte Dh<sup>a</sup> antigen; arb.num.(proc.) = ?

NPU20237 ErCs(B)—Erythrocyte Di<sup>a</sup> antigen; arb.num.(proc.) = ?

NPU20238 ErCs(B)—Erythrocyte Di<sup>b</sup> antigen; arb.num.(proc.) = ?

NPU20239 ErCs(B)—Erythrocyte Do<sup>a</sup> antigen; arb.num.(proc.) = ?

NPU20240 ErCs(B)—Erythrocyte Do<sup>b</sup> antigen; arb.num.(proc.) = ?

NPU20241 ErCs(B)—Erythrocyte Dr<sup>a</sup> antigen; arb.num.(proc.) = ?

NPU20242 ErCs(B)—Erythrocyte D<sup>w</sup> antigen; arb.num.(proc.) = ?

NPU20243 ErCs(B)—Erythrocyte E antigen; arb.num.(proc.) = ?

NPU20244 ErCs(B)—Erythrocyte e antigen; arb.num.(proc.) = ?

NPU20245 ErCs(B)—Erythrocyte ELO antigen; arb.num.(proc.) = ?

NPU20246 ErCs(B)—Erythrocyte En<sup>a</sup> antigen; arb.num.(proc.) = ?

NPU20247 ErCs(B)—Erythrocyte ENAV antigen; arb.num.(proc.) = ?

NPU20248 ErCs(B)—Erythrocyte ENEH antigen; arb.num.(proc.) = ?

NPU20249 ErCs(B)—Erythrocyte ENEP antigen; arb.num.(proc.) = ?

NPU20250 ErCs(B)—Erythrocyte ENKT antigen; arb.num.(proc.) = ?

NPU20251 ErCs(B)—Erythrocyte ERIK antigen; arb.num.(proc.) = ?

NPU20252 ErCs(B)—Erythrocyte Es<sup>a</sup> antigen; arb.num.(proc.) = ?

NPU20253 ErCs(B)—Erythrocyte Evans antigen; arb.num.(proc.) = ?

NPU20254 ErCs(B)—Erythrocyte E<sup>w</sup> antigen; arb.num.(proc.) = ?

NPU20255 ErCs(B)—Erythrocyte f antigen; arb.num.(proc.) = ?

NPU20256 ErCs(B)—Erythrocyte Far antigen; arb.num.(proc.) = ?

NPU20257 ErCs(B)—Erythrocyte FPTT antigen; arb.num.(proc.) = ?

NPU20258 ErCs(B)—Erythrocyte Fr<sup>a</sup> antigen; arb.num.(proc.) = ?

NPU20259 ErCs(B)—Erythrocyte Fy3 antigen; arb.num.(proc.) = ?

NPU20260 ErCs(B)—Erythrocyte Fy4 antigen; arb.num.(proc.) = ?

NPU20261 ErCs(B)—Erythrocyte Fy5 antigen; arb.num.(proc.) = ?

NPU20262 ErCs(B)—Erythrocyte Fy6 antigen; arb.num.(proc.) = ?

NPU20263 ErCs(B)—Erythrocyte Fy<sup>a</sup> antigen; arb.num.(proc.) = ?

NPU20264 ErCs(B)—Erythrocyte Fy<sup>b</sup> antigen; arb.num.(proc.) = ?

NPU20265 ErCs(B)—Erythrocyte G antigen; arb.num.(proc.) = ?

NPU20266 ErCs(B)—Erythrocyte Ge2 antigen; arb.num.(proc.) = ?

NPU20267 ErCs(B)—Erythrocyte Ge3 antigen; arb.num.(proc.) = ?

NPU20268 ErCs(B)—Erythrocyte Ge4 antigen; arb.num.(proc.) = ?

NPU20269 ErCs(B)—Erythrocyte Go<sup>a</sup> antigen; arb.num.(proc.) = ?

NPU20270 ErCs(B)—Erythrocyte Gy<sup>a</sup> antigen; arb.num.(proc.) = ?

NPU20271 ErCs(B)—Erythrocyte HAG antigen; arb.num.(proc.) = ?



NPU20349 ErCs(B)—Erythrocyte MER2 antigen; arb.num.(proc.) = ?  
 NPU20350 ErCs(B)—Erythrocyte M<sup>G</sup> antigen; arb.num.(proc.) = ?  
 NPU20351 ErCs(B)—Erythrocyte Mi<sup>a</sup> antigen; arb.num.(proc.) = ?  
 NPU20352 ErCs(B)—Erythrocyte MINY antigen; arb.num.(proc.) = ?  
 NPU20353 ErCs(B)—Erythrocyte Mit antigen; arb.num.(proc.) = ?  
 NPU20354 ErCs(B)—Erythrocyte Mo<sup>a</sup> antigen; arb.num.(proc.) = ?  
 NPU20355 ErCs(B)—Erythrocyte Mt<sup>a</sup> antigen; arb.num.(proc.) = ?  
 NPU20356 ErCs(B)—Erythrocyte Mur antigen; arb.num.(proc.) = ?  
 NPU20357 ErCs(B)—Erythrocyte MUT antigen; arb.num.(proc.) = ?  
 NPU20358 ErCs(B)—Erythrocyte M<sup>V</sup> antigen; arb.num.(proc.) = ?  
 NPU20359 ErCs(B)—Erythrocyte N antigen; arb.num.(proc.) = ?  
 NPU20360 ErCs(B)—Erythrocyte NFLD antigen; arb.num.(proc.) = ?  
 NPU20361 ErCs(B)—Erythrocyte Nob antigen; arb.num.(proc.) = ?  
 NPU20362 ErCs(B)—Erythrocyte Nou antigen; arb.num.(proc.) = ?  
 NPU20363 ErCs(B)—Erythrocyte Ny<sup>a</sup> antigen; arb.num.(proc.) = ?  
 NPU20364 ErCs(B)—Erythrocyte Ok<sup>a</sup> antigen; arb.num.(proc.) = ?  
 NPU20365 ErCs(B)—Erythrocyte Or antigen; arb.num.(proc.) = ?  
 NPU20366 ErCs(B)—Erythrocyte Os<sup>a</sup> antigen; arb.num.(proc.) = ?  
 NPU20367 ErCs(B)—Erythrocyte P1 antigen; arb.num.(proc.) = ?  
 NPU20368 ErCs(B)—Erythrocyte Rb<sup>a</sup> antigen; arb.num.(proc.) = ?  
 NPU20369 ErCs(B)—Erythrocyte Rg1 antigen; arb.num.(proc.) = ?  
 NPU20370 ErCs(B)—Erythrocyte Rg2 antigen; arb.num.(proc.) = ?  
 NPU20371 ErCs(B)—Erythrocyte Rh29 antigen; arb.num.(proc.) = ?  
 NPU20372 ErCs(B)—Erythrocyte Rh32 antigen; arb.num.(proc.) = ?  
 NPU20373 ErCs(B)—Erythrocyte Rh33 antigen; arb.num.(proc.) = ?  
 NPU20374 ErCs(B)—Erythrocyte Rh35 antigen; arb.num.(proc.) = ?  
 NPU20375 ErCs(B)—Erythrocyte Rh39 antigen; arb.num.(proc.) = ?  
 NPU20376 ErCs(B)—Erythrocyte Rh41 antigen; arb.num.(proc.) = ?  
 NPU20377 ErCs(B)—Erythrocyte Rh42 antigen; arb.num.(proc.) = ?  
 NPU20378 ErCs(B)—Erythrocyte Ri<sup>a</sup> antigen; arb.num.(proc.) = ?  
 NPU20379 ErCs(B)—Erythrocyte Riv antigen; arb.num.(proc.) = ?  
 NPU20380 ErCs(B)—Erythrocyte S antigen; arb.num.(proc.) = ?  
 NPU20381 ErCs(B)—Erythrocyte s antigen; arb.num.(proc.) = ?  
 NPU20382 ErCs(B)—Erythrocyte SAT antigen; arb.num.(proc.) = ?  
 NPU20383 ErCs(B)—Erythrocyte Sc1 antigen; arb.num.(proc.) = ?  
 NPU20384 ErCs(B)—Erythrocyte Sc2 antigen; arb.num.(proc.) = ?  
 NPU20385 ErCs(B)—Erythrocyte Sc3 antigen; arb.num.(proc.) = ?  
 NPU20386 ErCs(B)—Erythrocyte s<sup>D</sup> antigen; arb.num.(proc.) = ?  
 NPU20387 ErCs(B)—Erythrocyte Sec antigen; arb.num.(proc.) = ?  
 NPU20388 ErCs(B)—Erythrocyte Sl<sup>a</sup> antigen; arb.num.(proc.) = ?  
 NPU20389 ErCs(B)—Erythrocyte St<sup>a</sup> antigen; arb.num.(proc.) = ?  
 NPU20390 ErCs(B)—Erythrocyte STEM antigen; arb.num.(proc.) = ?  
 NPU20391 ErCs(B)—Erythrocyte SW1 antigen; arb.num.(proc.) = ?  
 NPU20392 ErCs(B)—Erythrocyte Sw<sup>a</sup> antigen; arb.num.(proc.) = ?  
 NPU20393 ErCs(B)—Erythrocyte Tar antigen; arb.num.(proc.) = ?  
 NPU20394 ErCs(B)—Erythrocyte Tc<sup>a</sup> antigen; arb.num.(proc.) = ?  
 NPU20395 ErCs(B)—Erythrocyte Tc<sup>b</sup> antigen; arb.num.(proc.) = ?  
 NPU20396 ErCs(B)—Erythrocyte Tc<sup>c</sup> antigen; arb.num.(proc.) = ?  
 NPU20397 ErCs(B)—Erythrocyte TOU antigen; arb.num.(proc.) = ?  
 NPU20398 ErCs(B)—Erythrocyte Tr<sup>a</sup> antigen; arb.num.(proc.) = ?  
 NPU20399 ErCs(B)—Erythrocyte TSEN antigen; arb.num.(proc.) = ?  
 NPU20400 ErCs(B)—Erythrocyte U antigen; arb.num.(proc.) = ?  
 NPU20401 ErCs(B)—Erythrocyte Uf<sup>a</sup> antigen; arb.num.(proc.) = ?  
 NPU20402 ErCs(B)—Erythrocyte UMC antigen; arb.num.(proc.) = ?  
 NPU20403 ErCs(B)—Erythrocyte V antigen; arb.num.(proc.) = ?  
 NPU20404 ErCs(B)—Erythrocyte Vg<sup>a</sup> antigen; arb.num.(proc.) = ?  
 NPU20405 ErCs(B)—Erythrocyte Vil antigen; arb.num.(proc.) = ?  
 NPU20406 ErCs(B)—Erythrocyte VLAN antigen; arb.num.(proc.) = ?  
 NPU20407 ErCs(B)—Erythrocyte Vr antigen; arb.num.(proc.) = ?  
 NPU20408 ErCs(B)—Erythrocyte VS antigen; arb.num.(proc.) = ?  
 NPU20409 ErCs(B)—Erythrocyte Vw antigen; arb.num.(proc.) = ?  
 NPU20410 ErCs(B)—Erythrocyte WARR antigen; arb.num.(proc.) = ?  
 NPU20411 ErCs(B)—Erythrocyte Wb antigen; arb.num.(proc.) = ?  
 NPU20412 ErCs(B)—Erythrocyte Wd<sup>a</sup> antigen; arb.num.(proc.) = ?  
 NPU20413 ErCs(B)—Erythrocyte WES<sup>a</sup> antigen; arb.num.(proc.) = ?  
 NPU20414 ErCs(B)—Erythrocyte WES<sup>b</sup> antigen; arb.num.(proc.) = ?  
 NPU20415 ErCs(B)—Erythrocyte WH antigen; arb.num.(proc.) = ?  
 NPU20416 ErCs(B)—Erythrocyte Wr<sup>a</sup> antigen; arb.num.(proc.) = ?  
 NPU20417 ErCs(B)—Erythrocyte Wr<sup>b</sup> antigen; arb.num.(proc.) = ?  
 NPU20418 ErCs(B)—Erythrocyte Wu antigen; arb.num.(proc.) = ?  
 NPU20419 ErCs(B)—Erythrocyte Xg<sup>a</sup> antigen; arb.num.(proc.) = ?  
 NPU20420 ErCs(B)—Erythrocyte Yk<sup>a</sup> antigen; arb.num.(proc.) = ?  
 NPU20421 ErCs(B)—Erythrocyte Yt<sup>a</sup> antigen; arb.num.(proc.) = ?  
 NPU20422 ErCs(B)—Erythrocyte Yt<sup>b</sup> antigen; arb.num.(proc.) = ?

**Erythrocytes(Blood)—**  
**Erythrocyte antigen;**  
**taxon(AB0; Rhesus D; procedure)**  
**NPU01945**  
 ErCs(B)—Erythrocyte antigen; taxon(AB0; Rh D; proc.) = ?

**Erythrocytes(Blood)—**  
**Erythrocyte antigen;**  
**taxon(procedure)**  
**NPU01946**  
 ErCs(B)—Erythrocyte antigen; taxon(proc.) = ?

**Plasma—**  
**Erythrocyte Au<sup>a</sup> antibody;**  
**arbitrary concentration(20 °C; procedure)**  
**NPU20433**  
 P—Erythrocyte Au<sup>a</sup> antibody; arb.c.(20 °C; proc.) = ?

**Plasma—**  
**Erythrocyte Au<sup>a</sup> antibody;**  
**arbitrary concentration(37 °C; procedure)**  
**NPU20434**  
 P—Erythrocyte Au<sup>a</sup> antibody; arb.c.(37 °C; proc.) = ?

**Plasma—**  
**Erythrocyte Au<sup>a</sup> antibody;**  
**arbitrary substance concentration(20 °C; procedure)**  
**arbitrary unit/litre**  
**NPU20885**  
 P—Erythrocyte Au<sup>a</sup> antibody; arb.subst.c.(20 °C; proc.) = ?  
 arb.unit/l

**Plasma—**  
**Erythrocyte Au<sup>a</sup> antibody;**  
**arbitrary substance concentration(37 °C; procedure)**  
**arbitrary unit/litre**  
**NPU20886**  
 P—Erythrocyte Au<sup>a</sup> antibody; arb.subst.c.(37 °C; proc.) = ?  
 arb.unit/l

**Erythrocytes(Blood)—**  
**Erythrocyte Au<sup>a</sup> antigen;**  
**arbitrary number(procedure)**  
**NPU20204**  
 ErCs(B)—Erythrocyte Au<sup>a</sup> antigen; arb.num.(proc.) = ?

**Plasma—**  
**Erythrocyte Au<sup>b</sup> antibody;**  
**arbitrary concentration(20 °C; procedure)**  
**NPU20435**  
 P—Erythrocyte Au<sup>b</sup> antibody; arb.c.(20 °C; proc.) = ?

**Plasma—**  
**Erythrocyte Au<sup>b</sup> antibody;**  
**arbitrary concentration(37 °C; procedure)**  
**NPU20436**  
 P—Erythrocyte Au<sup>b</sup> antibody; arb.c.(37 °C; proc.) = ?

**Plasma—**  
**Erythrocyte Au<sup>b</sup> antibody;**  
**arbitrary substance concentration(20 °C; procedure)**  
**arbitrary unit/litre**  
**NPU20887**  
 P—Erythrocyte Au<sup>b</sup> antibody; arb.subst.c.(20 °C; proc.) = ?  
 arb.unit/l

**Plasma—**  
**Erythrocyte Au<sup>b</sup> antibody;**  
**arbitrary substance concentration(37 °C; procedure)**  
**arbitrary unit/litre**  
**NPU20888**  
 P—Erythrocyte Au<sup>b</sup> antibody; arb.subst.c.(37 °C; proc.) = ?  
 arb.unit/l

**Erythrocytes(Blood)—**  
**Erythrocyte Au<sup>b</sup> antigen;**  
**arbitrary number(procedure)**  
**NPU20205**  
 ErCs(B)—Erythrocyte Au<sup>b</sup> antigen; arb.num.(proc.) = ?

**Plasma—**  
**Erythrocyte B antibody;**  
**arbitrary concentration(20 °C; procedure)**  
**NPU20437**  
 P—Erythrocyte B antibody; arb.c.(20 °C; proc.) = ?

**Plasma—**  
**Erythrocyte B antibody;**  
**arbitrary concentration(37 °C; procedure)**  
**NPU20438**  
 P—Erythrocyte B antibody; arb.c.(37 °C; proc.) = ?

**Plasma—**  
**Erythrocyte B antibody;**  
**arbitrary substance concentration(20 °C; procedure)**  
**arbitrary unit/litre**  
**NPU20889**  
 P—Erythrocyte B antibody; arb.subst.c.(20 °C; proc.) = ?  
 arb.unit/l

**Plasma—**  
**Erythrocyte B antibody;**  
**arbitrary substance concentration(37 °C; procedure)**  
**arbitrary unit/litre**  
**NPU20890**  
 P—Erythrocyte B antibody; arb.subst.c.(37 °C; proc.) = ?  
 arb.unit/l

**Erythrocytes(Blood)—**  
**Erythrocyte B antigen;**  
**arbitrary number(procedure)**  
**NPU21916**  
 ErCs(B)—Erythrocyte B antigen; arb.num.(proc.) = ?

**Plasma—**  
**Erythrocyte BARC antibody;**  
**arbitrary concentration(20 °C; procedure)**  
**NPU20439**  
 P—Erythrocyte BARC antibody; arb.c.(20 °C; proc.) = ?

**Plasma—**  
**Erythrocyte BARC antibody;**  
**arbitrary concentration(37 °C; procedure)**  
**NPU20440**  
 P—Erythrocyte BARC antibody; arb.c.(37 °C; proc.) = ?

**Plasma—**  
**Erythrocyte BARC antibody;**  
**arbitrary substance concentration(20 °C; procedure)**  
**arbitrary unit/litre**  
**NPU20891**  
 P—Erythrocyte BARC antibody; arb.subst.c.(20 °C; proc.) = ?  
 arb.unit/l

**Plasma—**  
**Erythrocyte BARC antibody;**  
**arbitrary substance concentration(37 °C; procedure)**  
**arbitrary unit/litre**  
**NPU20892**  
 P—Erythrocyte BARC antibody; arb.subst.c.(37 °C; proc.) = ?  
 arb.unit/l

**Erythrocytes(Blood)—**  
**Erythrocyte BARC antigen;**  
**arbitrary number(procedure)**  
**NPU20206**  
 ErCs(B)—Erythrocyte BARC antigen; arb.num.(proc.) = ?

**Plasma—**  
**Erythrocyte Be<sup>a</sup> antibody;**  
**arbitrary concentration(20 °C; procedure)**  
**NPU20441**  
 P—Erythrocyte Be<sup>a</sup> antibody; arb.c.(20 °C; proc.) = ?

**Plasma—**  
**Erythrocyte Be<sup>a</sup> antibody;**  
arbitrary concentration(37 °C; procedure)  
NPU20442  
P—Erythrocyte Be<sup>a</sup> antibody; arb.c.(37 °C; proc.) = ?

**Plasma—**  
**Erythrocyte Be<sup>a</sup> antibody;**  
arbitrary substance concentration(20 °C; procedure)  
arbitrary unit/litre  
NPU20893  
P—Erythrocyte Be<sup>a</sup> antibody; arb.subst.c.(20 °C; proc.) = ?  
arb.unit/l

**Plasma—**  
**Erythrocyte Be<sup>a</sup> antibody;**  
arbitrary substance concentration(37 °C; procedure)  
arbitrary unit/litre  
NPU20894  
P—Erythrocyte Be<sup>a</sup> antibody; arb.subst.c.(37 °C; proc.) = ?  
arb.unit/l

**Erythrocytes(Blood)—**  
**Erythrocyte Be<sup>a</sup> antigen;**  
arbitrary number(procedure)  
NPU20207  
ErCs(B)—Erythrocyte Be<sup>a</sup> antigen; arb.num.(proc.) = ?

**Plasma—**  
**Erythrocyte BLe<sup>b</sup> antibody;**  
arbitrary concentration(20 °C; procedure)  
NPU20443  
P—Erythrocyte BLe<sup>b</sup> antibody; arb.c.(20 °C; proc.) = ?

**Plasma—**  
**Erythrocyte BLe<sup>b</sup> antibody;**  
arbitrary concentration(37 °C; procedure)  
NPU20444  
P—Erythrocyte BLe<sup>b</sup> antibody; arb.c.(37 °C; proc.) = ?

**Plasma—**  
**Erythrocyte BLe<sup>b</sup> antibody;**  
arbitrary substance concentration(20 °C; procedure)  
arbitrary unit/litre  
NPU20895  
P—Erythrocyte BLe<sup>b</sup> antibody; arb.subst.c.(20 °C; proc.) = ?  
arb.unit/l

**Plasma—**  
**Erythrocyte BLe<sup>b</sup> antibody;**  
arbitrary substance concentration(37 °C; procedure)  
arbitrary unit/litre  
NPU20896  
P—Erythrocyte BLe<sup>b</sup> antibody; arb.subst.c.(37 °C; proc.) = ?  
arb.unit/l

**Erythrocytes(Blood)—**  
**Erythrocyte BLe<sup>b</sup> antigen;**  
arbitrary number(procedure)  
NPU20208  
ErCs(B)—Erythrocyte BLe<sup>b</sup> antigen; arb.num.(proc.) = ?

**Plasma—**  
**Erythrocyte BOW antibody;**  
arbitrary concentration(20 °C; procedure)  
NPU20445  
P—Erythrocyte BOW antibody; arb.c.(20 °C; proc.) = ?

**Plasma—**  
**Erythrocyte BOW antibody;**  
arbitrary concentration(37 °C; procedure)  
NPU20446  
P—Erythrocyte BOW antibody; arb.c.(37 °C; proc.) = ?

**Plasma—**  
**Erythrocyte BOW antibody;**  
arbitrary substance concentration(20 °C; procedure)  
arbitrary unit/litre  
NPU20897  
P—Erythrocyte BOW antibody; arb.subst.c.(20 °C; proc.) = ?  
arb.unit/l

**Plasma—**  
**Erythrocyte BOW antibody;**  
arbitrary substance concentration(37 °C; procedure)  
arbitrary unit/litre  
NPU20898  
P—Erythrocyte BOW antibody; arb.subst.c.(37 °C; proc.) = ?  
arb.unit/l

**Erythrocytes(Blood)—**  
**Erythrocyte BOW antigen;**  
arbitrary number(procedure)  
NPU20209  
ErCs(B)—Erythrocyte BOW antigen; arb.num.(proc.) = ?

**Plasma—**  
**Erythrocyte Bp<sup>a</sup> antibody;**  
arbitrary concentration(20 °C; procedure)  
NPU20447  
P—Erythrocyte Bp<sup>a</sup> antibody; arb.c.(20 °C; proc.) = ?

**Plasma—**  
**Erythrocyte Bp<sup>a</sup> antibody;**  
arbitrary concentration(37 °C; procedure)  
NPU20448  
P—Erythrocyte Bp<sup>a</sup> antibody; arb.c.(37 °C; proc.) = ?

**Plasma—**  
**Erythrocyte Bp<sup>a</sup> antibody;**  
arbitrary substance concentration(20 °C; procedure)  
arbitrary unit/litre  
NPU20899  
P—Erythrocyte Bp<sup>a</sup> antibody; arb.subst.c.(20 °C; proc.) = ?  
arb.unit/l

**Plasma—**  
**Erythrocyte Bp<sup>a</sup> antibody;**  
arbitrary substance concentration(37 °C; procedure)  
arbitrary unit/litre  
NPU20900  
P—Erythrocyte Bp<sup>a</sup> antibody; arb.subst.c.(37 °C; proc.) = ?  
arb.unit/l

**Erythrocytes(Blood)—**  
**Erythrocyte Bp<sup>a</sup> antigen;**  
arbitrary number(procedure)  
NPU20210  
ErCs(B)—Erythrocyte Bp<sup>a</sup> antigen; arb.num.(proc.) = ?

**Plasma—**  
**Erythrocyte C antibody;**  
arbitrary concentration(20 °C; procedure)  
NPU20449  
P—Erythrocyte C antibody; arb.c.(20 °C; proc.) = ?

**Plasma—**  
**Erythrocyte c antibody;**  
arbitrary concentration(20 °C; procedure)  
NPU20450  
P—Erythrocyte c antibody; arb.c.(20 °C; proc.) = ?

**Plasma—**  
**Erythrocyte C antibody;**  
arbitrary concentration(37 °C; procedure)  
NPU20451  
P—Erythrocyte C antibody; arb.c.(37 °C; proc.) = ?

**Plasma—**  
**Erythrocyte c antibody;**  
**arbitrary concentration(37 °C; procedure)**  
**NPU20452**  
P—Erythrocyte c antibody; arb.c.(37 °C; proc.) = ?

**Plasma—**  
**Erythrocyte C antibody;**  
**arbitrary substance concentration(20 °C; procedure)**  
**arbitrary unit/litre**  
**NPU20901**  
P—Erythrocyte C antibody; arb.subst.c.(20 °C; proc.) = ?  
arb.unit/l

**Plasma—**  
**Erythrocyte c antibody;**  
**arbitrary substance concentration(20 °C; procedure)**  
**arbitrary unit/litre**  
**NPU20902**  
P—Erythrocyte c antibody; arb.subst.c.(20 °C; proc.) = ?  
arb.unit/l

**Plasma—**  
**Erythrocyte C antibody;**  
**arbitrary substance concentration(37 °C; procedure)**  
**arbitrary unit/litre**  
**NPU20903**  
P—Erythrocyte C antibody; arb.subst.c.(37 °C; proc.) = ?  
arb.unit/l

**Plasma—**  
**Erythrocyte c antibody;**  
**arbitrary substance concentration(37 °C; procedure)**  
**arbitrary unit/litre**  
**NPU20904**  
P—Erythrocyte c antibody; arb.subst.c.(37 °C; proc.) = ?  
arb.unit/l

**Erythrocytes(Blood)—**  
**Erythrocyte C antigen;**  
**arbitrary number(procedure)**  
**NPU20211**  
Ercs(B)—Erythrocyte C antigen; arb.num.(proc.) = ?

**Erythrocytes(Blood)—**  
**Erythrocyte c antigen;**  
**arbitrary number(procedure)**  
**NPU20212**  
Ercs(B)—Erythrocyte c antigen; arb.num.(proc.) = ?

**Plasma—**  
**Erythrocyte C<sup>G</sup> antibody;**  
**arbitrary concentration(20 °C; procedure)**  
**NPU20461**  
P—Erythrocyte C<sup>G</sup> antibody; arb.c.(20 °C; proc.) = ?

**Plasma—**  
**Erythrocyte C<sup>G</sup> antibody;**  
**arbitrary concentration(37 °C; procedure)**  
**NPU20462**  
P—Erythrocyte C<sup>G</sup> antibody; arb.c.(37 °C; proc.) = ?

**Plasma—**  
**Erythrocyte C<sup>G</sup> antibody;**  
**arbitrary substance concentration(20 °C; procedure)**  
**arbitrary unit/litre**  
**NPU20913**  
P—Erythrocyte C<sup>G</sup> antibody; arb.subst.c.(20 °C; proc.) = ?  
arb.unit/l

**Plasma—**  
**Erythrocyte C<sup>G</sup> antibody;**  
**arbitrary substance concentration(37 °C; procedure)**  
**arbitrary unit/litre**  
**NPU20914**  
P—Erythrocyte C<sup>G</sup> antibody; arb.subst.c.(37 °C; proc.) = ?  
arb.unit/l

**Erythrocytes(Blood)—**  
**Erythrocyte C<sup>G</sup> antigen;**  
**arbitrary number(procedure)**  
**NPU20217**  
Ercs(B)—Erythrocyte C<sup>G</sup> antigen; arb.num.(proc.) = ?

**Plasma—**  
**Erythrocyte C<sup>w</sup> antibody;**  
**arbitrary concentration(20 °C; procedure)**  
**NPU20489**  
P—Erythrocyte C<sup>w</sup> antibody; arb.c.(20 °C; proc.) = ?

**Plasma—**  
**Erythrocyte C<sup>w</sup> antibody;**  
**arbitrary concentration(37 °C; procedure)**  
**NPU20490**  
P—Erythrocyte C<sup>w</sup> antibody; arb.c.(37 °C; proc.) = ?

**Plasma—**  
**Erythrocyte C<sup>w</sup> antibody;**  
**arbitrary substance concentration(20 °C; procedure)**  
**arbitrary unit/litre**  
**NPU20941**  
P—Erythrocyte C<sup>w</sup> antibody; arb.subst.c.(20 °C; proc.) = ?  
arb.unit/l

**Plasma—**  
**Erythrocyte C<sup>w</sup> antibody;**  
**arbitrary substance concentration(37 °C; procedure)**  
**arbitrary unit/litre**  
**NPU20942**  
P—Erythrocyte C<sup>w</sup> antibody; arb.subst.c.(37 °C; proc.) = ?  
arb.unit/l

**Erythrocytes(Blood)—**  
**Erythrocyte C<sup>w</sup> antigen;**  
**arbitrary number(procedure)**  
**NPU20231**  
Ercs(B)—Erythrocyte C<sup>w</sup> antigen; arb.num.(proc.) = ?

**Plasma—**  
**Erythrocyte C<sup>x</sup> antibody;**  
**arbitrary concentration(20 °C; procedure)**  
**NPU20491**  
P—Erythrocyte C<sup>x</sup> antibody; arb.c.(20 °C; proc.) = ?

**Plasma—**  
**Erythrocyte C<sup>x</sup> antibody;**  
**arbitrary concentration(37 °C; procedure)**  
**NPU20492**  
P—Erythrocyte C<sup>x</sup> antibody; arb.c.(37 °C; proc.) = ?

**Plasma—**  
**Erythrocyte C<sup>x</sup> antibody;**  
**arbitrary substance concentration(20 °C; procedure)**  
**arbitrary unit/litre**  
**NPU20943**  
P—Erythrocyte C<sup>x</sup> antibody; arb.subst.c.(20 °C; proc.) = ?  
arb.unit/l

**Plasma—**  
**Erythrocyte C<sup>x</sup> antibody;**  
**arbitrary substance concentration(37 °C; procedure)**  
**arbitrary unit/litre**  
**NPU20944**  
P—Erythrocyte C<sup>x</sup> antibody; arb.subst.c.(37 °C; proc.) = ?  
arb.unit/l

**Erythrocytes(Blood)—**  
**Erythrocyte C<sup>x</sup> antigen;**  
**arbitrary number(procedure)**  
**NPU20232**  
Ercs(B)—Erythrocyte C<sup>x</sup> antigen; arb.num.(proc.) = ?

**Plasma—**  
**Erythrocyte CD99 antibody;**  
**arbitrary concentration(20 °C; procedure)**  
**NPU20453**  
P—Erythrocyte CD99 antibody; arb.c.(20 °C; proc.) = ?

**Plasma—**  
**Erythrocyte CD99 antibody;**  
**arbitrary concentration(37 °C; procedure)**  
**NPU20454**  
P—Erythrocyte CD99 antibody; arb.c.(37 °C; proc.) = ?

**Plasma—**  
**Erythrocyte CD99 antibody;**  
**arbitrary substance concentration(20 °C; procedure)**  
**arbitrary unit/litre**  
**NPU20905**  
P—Erythrocyte CD99 antibody; arb.subst.c.(20 °C; proc.) = ?  
arb.unit/l

**Plasma—**  
**Erythrocyte CD99 antibody;**  
**arbitrary substance concentration(37 °C; procedure)**  
**arbitrary unit/litre**  
**NPU20906**  
P—Erythrocyte CD99 antibody; arb.subst.c.(37 °C; proc.) = ?  
arb.unit/l

**Erythrocytes(Blood)—**  
**Erythrocyte CD99 antigen;**  
**arbitrary number(procedure)**  
**NPU20213**  
ErCs(B)—Erythrocyte CD99 antigen; arb.num.(proc.) = ?

**Plasma—**  
**Erythrocyte Ce antibody;**  
**arbitrary concentration(20 °C; procedure)**  
**NPU20455**  
P—Erythrocyte Ce antibody; arb.c.(20 °C; proc.) = ?

**Plasma—**  
**Erythrocyte CE antibody;**  
**arbitrary concentration(20 °C; procedure)**  
**NPU20456**  
P—Erythrocyte CE antibody; arb.c.(20 °C; proc.) = ?

**Plasma—**  
**Erythrocyte cE antibody;**  
**arbitrary concentration(20 °C; procedure)**  
**NPU20457**  
P—Erythrocyte cE antibody; arb.c.(20 °C; proc.) = ?

**Plasma—**  
**Erythrocyte Ce antibody;**  
**arbitrary concentration(37 °C; procedure)**  
**NPU20458**  
P—Erythrocyte Ce antibody; arb.c.(37 °C; proc.) = ?

**Plasma—**  
**Erythrocyte CE antibody;**  
**arbitrary concentration(37 °C; procedure)**  
**NPU20459**  
P—Erythrocyte CE antibody; arb.c.(37 °C; proc.) = ?

**Plasma—**  
**Erythrocyte cE antibody;**  
**arbitrary concentration(37 °C; procedure)**  
**NPU20460**  
P—Erythrocyte cE antibody; arb.c.(37 °C; proc.) = ?

**Plasma—**  
**Erythrocyte Ce antibody;**  
**arbitrary substance concentration(20 °C; procedure)**  
**arbitrary unit/litre**  
**NPU20907**  
P—Erythrocyte Ce antibody; arb.subst.c.(20 °C; proc.) = ?  
arb.unit/l

**Plasma—**  
**Erythrocyte CE antibody;**  
**arbitrary substance concentration(20 °C; procedure)**  
**arbitrary unit/litre**  
**NPU20908**  
P—Erythrocyte CE antibody; arb.subst.c.(20 °C; proc.) = ?  
arb.unit/l

**Plasma—**  
**Erythrocyte cE antibody;**  
**arbitrary substance concentration(20 °C; procedure)**  
**arbitrary unit/litre**  
**NPU20909**  
P—Erythrocyte cE antibody; arb.subst.c.(20 °C; proc.) = ?  
arb.unit/l

**Plasma—**  
**Erythrocyte Ce antibody;**  
**arbitrary substance concentration(37 °C; procedure)**  
**arbitrary unit/litre**  
**NPU20910**  
P—Erythrocyte Ce antibody; arb.subst.c.(37 °C; proc.) = ?  
arb.unit/l

**Plasma—**  
**Erythrocyte CE antibody;**  
**arbitrary substance concentration(37 °C; procedure)**  
**arbitrary unit/litre**  
**NPU20911**  
P—Erythrocyte CE antibody; arb.subst.c.(37 °C; proc.) = ?  
arb.unit/l

**Plasma—**  
**Erythrocyte cE antibody;**  
**arbitrary substance concentration(37 °C; procedure)**  
**arbitrary unit/litre**  
**NPU20912**  
P—Erythrocyte cE antibody; arb.subst.c.(37 °C; proc.) = ?  
arb.unit/l

**Erythrocytes(Blood)—**  
**Erythrocyte Ce antigen;**  
**arbitrary number(procedure)**  
**NPU20214**  
ErCs(B)—Erythrocyte Ce antigen; arb.num.(proc.) = ?

**Erythrocytes(Blood)—**  
**Erythrocyte CE antigen;**  
**arbitrary number(procedure)**  
**NPU20215**  
ErCs(B)—Erythrocyte CE antigen; arb.num.(proc.) = ?

**Erythrocytes(Blood)—**  
**Erythrocyte cE antigen;**  
**arbitrary number(procedure)**  
**NPU20216**  
ErCs(B)—Erythrocyte cE antigen; arb.num.(proc.) = ?

**Plasma—**  
**Erythrocyte Ch1 antibody;**  
**arbitrary concentration(20 °C; procedure)**  
**NPU20463**  
P—Erythrocyte Ch1 antibody; arb.c.(20 °C; proc.) = ?

**Plasma—**  
**Erythrocyte Ch1 antibody;**  
**arbitrary concentration(37 °C; procedure)**  
**NPU20464**  
P—Erythrocyte Ch1 antibody; arb.c.(37 °C; proc.) = ?

**Plasma—**  
**Erythrocyte Ch1 antibody;**  
arbitrary substance concentration(20 °C; procedure)  
arbitrary unit/litre  
**NPU20915**  
P—Erythrocyte Ch1 antibody; arb.subst.c.(20 °C; proc.) = ?  
arb.unit/l

**Plasma—**  
**Erythrocyte Ch1 antibody;**  
arbitrary substance concentration(37 °C; procedure)  
arbitrary unit/litre  
**NPU20916**  
P—Erythrocyte Ch1 antibody; arb.subst.c.(37 °C; proc.) = ?  
arb.unit/l

**Erythrocytes(Blood)—**  
**Erythrocyte Ch1 antigen;**  
arbitrary number(procedure)  
**NPU20218**  
Ercs(B)—Erythrocyte Ch1 antigen; arb.num.(proc.) = ?

**Plasma—**  
**Erythrocyte Ch2 antibody;**  
arbitrary concentration(20 °C; procedure)  
**NPU20465**  
P—Erythrocyte Ch2 antibody; arb.c.(20 °C; proc.) = ?

**Plasma—**  
**Erythrocyte Ch2 antibody;**  
arbitrary concentration(37 °C; procedure)  
**NPU20466**  
P—Erythrocyte Ch2 antibody; arb.c.(37 °C; proc.) = ?

**Plasma—**  
**Erythrocyte Ch2 antibody;**  
arbitrary substance concentration(20 °C; procedure)  
arbitrary unit/litre  
**NPU20917**  
P—Erythrocyte Ch2 antibody; arb.subst.c.(20 °C; proc.) = ?  
arb.unit/l

**Plasma—**  
**Erythrocyte Ch2 antibody;**  
arbitrary substance concentration(37 °C; procedure)  
arbitrary unit/litre  
**NPU20918**  
P—Erythrocyte Ch2 antibody; arb.subst.c.(37 °C; proc.) = ?  
arb.unit/l

**Erythrocytes(Blood)—**  
**Erythrocyte Ch2 antigen;**  
arbitrary number(procedure)  
**NPU20219**  
Ercs(B)—Erythrocyte Ch2 antigen; arb.num.(proc.) = ?

**Plasma—**  
**Erythrocyte Ch3 antibody;**  
arbitrary concentration(20 °C; procedure)  
**NPU20467**  
P—Erythrocyte Ch3 antibody; arb.c.(20 °C; proc.) = ?

**Plasma—**  
**Erythrocyte Ch3 antibody;**  
arbitrary concentration(37 °C; procedure)  
**NPU20468**  
P—Erythrocyte Ch3 antibody; arb.c.(37 °C; proc.) = ?

**Plasma—**  
**Erythrocyte Ch3 antibody;**  
arbitrary substance concentration(20 °C; procedure)  
arbitrary unit/litre  
**NPU20919**  
P—Erythrocyte Ch3 antibody; arb.subst.c.(20 °C; proc.) = ?  
arb.unit/l

**Plasma—**  
**Erythrocyte Ch3 antibody;**  
arbitrary substance concentration(37 °C; procedure)  
arbitrary unit/litre  
**NPU20920**  
P—Erythrocyte Ch3 antibody; arb.subst.c.(37 °C; proc.) = ?  
arb.unit/l

**Erythrocytes(Blood)—**  
**Erythrocyte Ch3 antigen;**  
arbitrary number(procedure)  
**NPU20220**  
Ercs(B)—Erythrocyte Ch3 antigen; arb.num.(proc.) = ?

**Plasma—**  
**Erythrocyte Ch4 antibody;**  
arbitrary concentration(20 °C; procedure)  
**NPU20469**  
P—Erythrocyte Ch4 antibody; arb.c.(20 °C; proc.) = ?

**Plasma—**  
**Erythrocyte Ch4 antibody;**  
arbitrary concentration(37 °C; procedure)  
**NPU20470**  
P—Erythrocyte Ch4 antibody; arb.c.(37 °C; proc.) = ?

**Plasma—**  
**Erythrocyte Ch4 antibody;**  
arbitrary substance concentration(20 °C; procedure)  
arbitrary unit/litre  
**NPU20921**  
P—Erythrocyte Ch4 antibody; arb.subst.c.(20 °C; proc.) = ?  
arb.unit/l

**Plasma—**  
**Erythrocyte Ch4 antibody;**  
arbitrary substance concentration(37 °C; procedure)  
arbitrary unit/litre  
**NPU20922**  
P—Erythrocyte Ch4 antibody; arb.subst.c.(37 °C; proc.) = ?  
arb.unit/l

**Erythrocytes(Blood)—**  
**Erythrocyte Ch4 antigen;**  
arbitrary number(procedure)  
**NPU20221**  
Ercs(B)—Erythrocyte Ch4 antigen; arb.num.(proc.) = ?

**Plasma—**  
**Erythrocyte Ch5 antibody;**  
arbitrary concentration(20 °C; procedure)  
**NPU20471**  
P—Erythrocyte Ch5 antibody; arb.c.(20 °C; proc.) = ?

**Plasma—**  
**Erythrocyte Ch5 antibody;**  
arbitrary concentration(37 °C; procedure)  
**NPU20472**  
P—Erythrocyte Ch5 antibody; arb.c.(37 °C; proc.) = ?

**Plasma—**  
**Erythrocyte Ch5 antibody;**  
arbitrary substance concentration(20 °C; procedure)  
arbitrary unit/litre  
**NPU20923**  
P—Erythrocyte Ch5 antibody; arb.subst.c.(20 °C; proc.) = ?  
arb.unit/l

**Plasma—**  
**Erythrocyte Ch5 antibody;**  
arbitrary substance concentration(37 °C; procedure)  
arbitrary unit/litre  
**NPU20924**  
P—Erythrocyte Ch5 antibody; arb.subst.c.(37 °C; proc.) = ?  
arb.unit/l

**Erythrocytes(Blood)—**  
**Erythrocyte Ch5 antigen;**  
**arbitrary number(procedure)**  
**NPU20222**  
ErCs(B)—Erythrocyte Ch5 antigen; arb.num.(proc.) = ?

**Plasma—**  
**Erythrocyte Ch6 antibody;**  
**arbitrary concentration(20 °C; procedure)**  
**NPU20473**  
P—Erythrocyte Ch6 antibody; arb.c.(20 °C; proc.) = ?

**Plasma—**  
**Erythrocyte Ch6 antibody;**  
**arbitrary concentration(37 °C; procedure)**  
**NPU20474**  
P—Erythrocyte Ch6 antibody; arb.c.(37 °C; proc.) = ?

**Plasma—**  
**Erythrocyte Ch6 antibody;**  
**arbitrary substance concentration(20 °C; procedure)**  
**arbitrary unit/litre**  
**NPU20925**  
P—Erythrocyte Ch6 antibody; arb.subst.c.(20 °C; proc.) = ?  
arb.unit/l

**Plasma—**  
**Erythrocyte Ch6 antibody;**  
**arbitrary substance concentration(37 °C; procedure)**  
**arbitrary unit/litre**  
**NPU20926**  
P—Erythrocyte Ch6 antibody; arb.subst.c.(37 °C; proc.) = ?  
arb.unit/l

**Erythrocytes(Blood)—**  
**Erythrocyte Ch6 antigen;**  
**arbitrary number(procedure)**  
**NPU20223**  
ErCs(B)—Erythrocyte Ch6 antigen; arb.num.(proc.) = ?

**Plasma—**  
**Erythrocyte Cl<sup>a</sup> antibody;**  
**arbitrary concentration(20 °C; procedure)**  
**NPU20475**  
P—Erythrocyte Cl<sup>a</sup> antibody; arb.c.(20 °C; proc.) = ?

**Plasma—**  
**Erythrocyte Cl<sup>a</sup> antibody;**  
**arbitrary concentration(37 °C; procedure)**  
**NPU20476**  
P—Erythrocyte Cl<sup>a</sup> antibody; arb.c.(37 °C; proc.) = ?

**Plasma—**  
**Erythrocyte Cl<sup>a</sup> antibody;**  
**arbitrary substance concentration(20 °C; procedure)**  
**arbitrary unit/litre**  
**NPU20927**  
P—Erythrocyte Cl<sup>a</sup> antibody; arb.subst.c.(20 °C; proc.) = ?  
arb.unit/l

**Plasma—**  
**Erythrocyte Cl<sup>a</sup> antibody;**  
**arbitrary substance concentration(37 °C; procedure)**  
**arbitrary unit/litre**  
**NPU20928**  
P—Erythrocyte Cl<sup>a</sup> antibody; arb.subst.c.(37 °C; proc.) = ?  
arb.unit/l

**Erythrocytes(Blood)—**  
**Erythrocyte Cl<sup>a</sup> antigen;**  
**arbitrary number(procedure)**  
**NPU20224**  
ErCs(B)—Erythrocyte Cl<sup>a</sup> antigen; arb.num.(proc.) = ?

**Plasma—**  
**Erythrocyte c-like antibody;**  
**arbitrary concentration(20 °C; procedure)**  
**NPU20477**  
P—Erythrocyte c-like antibody; arb.c.(20 °C; proc.) = ?

**Plasma—**  
**Erythrocyte c-like antibody;**  
**arbitrary concentration(37 °C; procedure)**  
**NPU20478**  
P—Erythrocyte c-like antibody; arb.c.(37 °C; proc.) = ?

**Plasma—**  
**Erythrocyte c-like antibody;**  
**arbitrary substance concentration(20 °C; procedure)**  
**arbitrary unit/litre**  
**NPU20929**  
P—Erythrocyte c-like antibody; arb.subst.c.(20 °C; proc.) = ?  
arb.unit/l

**Plasma—**  
**Erythrocyte c-like antibody;**  
**arbitrary substance concentration(37 °C; procedure)**  
**arbitrary unit/litre**  
**NPU20930**  
P—Erythrocyte c-like antibody; arb.subst.c.(37 °C; proc.) = ?  
arb.unit/l

**Erythrocytes(Blood)—**  
**Erythrocyte c-like antigen;**  
**arbitrary number(procedure)**  
**NPU20225**  
ErCs(B)—Erythrocyte c-like antigen; arb.num.(proc.) = ?

**Plasma—**  
**Erythrocyte Co<sup>a</sup> antibody;**  
**arbitrary concentration(20 °C; procedure)**  
**NPU20481**  
P—Erythrocyte Co<sup>a</sup> antibody; arb.c.(20 °C; proc.) = ?

**Plasma—**  
**Erythrocyte Co<sup>a</sup> antibody;**  
**arbitrary concentration(37 °C; procedure)**  
**NPU20482**  
P—Erythrocyte Co<sup>a</sup> antibody; arb.c.(37 °C; proc.) = ?

**Plasma—**  
**Erythrocyte Co<sup>a</sup> antibody;**  
**arbitrary substance concentration(20 °C; procedure)**  
**arbitrary unit/litre**  
**NPU20933**  
P—Erythrocyte Co<sup>a</sup> antibody; arb.subst.c.(20 °C; proc.) = ?  
arb.unit/l

**Plasma—**  
**Erythrocyte Co<sup>a</sup> antibody;**  
**arbitrary substance concentration(37 °C; procedure)**  
**arbitrary unit/litre**  
**NPU20934**  
P—Erythrocyte Co<sup>a</sup> antibody; arb.subst.c.(37 °C; proc.) = ?  
arb.unit/l

**Erythrocytes(Blood)—**  
**Erythrocyte Co<sup>a</sup> antigen;**  
**arbitrary number(procedure)**  
**NPU20227**  
ErCs(B)—Erythrocyte Co<sup>a</sup> antigen; arb.num.(proc.) = ?

**Plasma—**  
**Erythrocyte Co<sup>b</sup> antibody;**  
**arbitrary concentration(20 °C; procedure)**  
**NPU20483**  
P—Erythrocyte Co<sup>b</sup> antibody; arb.c.(20 °C; proc.) = ?

**Plasma—**  
**Erythrocyte Co<sup>b</sup>antibody;**  
arbitrary concentration(37 °C; procedure)  
NPU20484  
P—Erythrocyte Co<sup>b</sup>antibody; arb.c.(37 °C; proc.) = ?

**Plasma—**  
**Erythrocyte Co<sup>b</sup>antibody;**  
arbitrary substance concentration(20 °C; procedure)  
arbitrary unit/litre  
NPU20935  
P—Erythrocyte Co<sup>b</sup>antibody; arb.subst.c.(20 °C; proc.) = ?  
arb.unit/l

**Plasma—**  
**Erythrocyte Co<sup>b</sup>antibody;**  
arbitrary substance concentration(37 °C; procedure)  
arbitrary unit/litre  
NPU20936  
P—Erythrocyte Co<sup>b</sup>antibody; arb.subst.c.(37 °C; proc.) = ?  
arb.unit/l

**Erythrocytes(Blood)—**  
**Erythrocyte Co<sup>b</sup>antigen;**  
arbitrary number(procedure)  
NPU20228  
ErCs(B)—Erythrocyte Co<sup>b</sup>antigen; arb.num.(proc.) = ?

**Plasma—**  
**Erythrocyte Co3 antibody;**  
arbitrary concentration(20 °C; procedure)  
NPU20479  
P—Erythrocyte Co3 antibody; arb.c.(20 °C; proc.) = ?

**Plasma—**  
**Erythrocyte Co3 antibody;**  
arbitrary concentration(37 °C; procedure)  
NPU20480  
P—Erythrocyte Co3 antibody; arb.c.(37 °C; proc.) = ?

**Plasma—**  
**Erythrocyte Co3 antibody;**  
arbitrary substance concentration(20 °C; procedure)  
arbitrary unit/litre  
NPU20931  
P—Erythrocyte Co3 antibody; arb.subst.c.(20 °C; proc.) = ?  
arb.unit/l

**Plasma—**  
**Erythrocyte Co3 antibody;**  
arbitrary substance concentration(37 °C; procedure)  
arbitrary unit/litre  
NPU20932  
P—Erythrocyte Co3 antibody; arb.subst.c.(37 °C; proc.) = ?  
arb.unit/l

**Erythrocytes(Blood)—**  
**Erythrocyte Co3 antigen;**  
arbitrary number(procedure)  
NPU20226  
ErCs(B)—Erythrocyte Co3 antigen; arb.num.(proc.) = ?

**Plasma—**  
**Erythrocyte Cr<sup>a</sup> antibody;**  
arbitrary concentration(20 °C; procedure)  
NPU20485  
P—Erythrocyte Cr<sup>a</sup> antibody; arb.c.(20 °C; proc.) = ?

**Plasma—**  
**Erythrocyte Cr<sup>a</sup> antibody;**  
arbitrary concentration(37 °C; procedure)  
NPU20486  
P—Erythrocyte Cr<sup>a</sup> antibody; arb.c.(37 °C; proc.) = ?

**Plasma—**  
**Erythrocyte Cr<sup>a</sup> antibody;**  
arbitrary substance concentration(20 °C; procedure)  
arbitrary unit/litre  
NPU20937  
P—Erythrocyte Cr<sup>a</sup> antibody; arb.subst.c.(20 °C; proc.) = ?  
arb.unit/l

**Plasma—**  
**Erythrocyte Cr<sup>a</sup> antibody;**  
arbitrary substance concentration(37 °C; procedure)  
arbitrary unit/litre  
NPU20938  
P—Erythrocyte Cr<sup>a</sup> antibody; arb.subst.c.(37 °C; proc.) = ?  
arb.unit/l

**Erythrocytes(Blood)—**  
**Erythrocyte Cr<sup>a</sup> antigen;**  
arbitrary number(procedure)  
NPU20229  
ErCs(B)—Erythrocyte Cr<sup>a</sup> antigen; arb.num.(proc.) = ?

**Plasma—**  
**Erythrocyte Crawford antibody;**  
arbitrary concentration(20 °C; procedure)  
NPU20487  
P—Erythrocyte Crawford antibody; arb.c.(20 °C; proc.) = ?

**Plasma—**  
**Erythrocyte Crawford antibody;**  
arbitrary concentration(37 °C; procedure)  
NPU20488  
P—Erythrocyte Crawford antibody; arb.c.(37 °C; proc.) = ?

**Plasma—**  
**Erythrocyte Crawford antibody;**  
arbitrary substance concentration(20 °C; procedure)  
arbitrary unit/litre  
NPU20939  
P—Erythrocyte Crawford antibody; arb.subst.c.(20 °C; proc.) = ?  
arb.unit/l

**Plasma—**  
**Erythrocyte Crawford antibody;**  
arbitrary substance concentration(37 °C; procedure)  
arbitrary unit/litre  
NPU20940  
P—Erythrocyte Crawford antibody; arb.subst.c.(37 °C; proc.) = ?  
arb.unit/l

**Erythrocytes(Blood)—**  
**Erythrocyte Crawford antigen;**  
arbitrary number(procedure)  
NPU20230  
ErCs(B)—Erythrocyte Crawford antigen; arb.num.(proc.) = ?

**Plasma—**  
**Erythrocyte D antibody;**  
arbitrary concentration(20 °C; procedure)  
NPU20495  
P—Erythrocyte D antibody; arb.c.(20 °C; proc.) = ?

**Plasma—**  
**Erythrocyte D antibody;**  
arbitrary concentration(37 °C; procedure)  
NPU20496  
P—Erythrocyte D antibody; arb.c.(37 °C; proc.) = ?

**Plasma—**  
**Erythrocyte D antibody;**  
arbitrary substance concentration(20 °C; procedure)  
arbitrary unit/litre  
NPU20947  
P—Erythrocyte D antibody; arb.subst.c.(20 °C; proc.) = ?  
arb.unit/l

**Plasma—**  
**Erythrocyte D antibody;**  
arbitrary substance concentration(37 °C; procedure)  
arbitrary unit/litre  
**NPU20948**  
P—Erythrocyte D antibody; arb.subst.c.(37 °C; proc.) = ?  
arb.unit/l

**Erythrocytes(Blood)—**  
**Erythrocyte D antigen;**  
arbitrary number(procedure)  
**NPU21917**  
Ercs(B)—Erythrocyte D antigen; arb.num.(proc.) = ?

**Plasma—**  
**Erythrocyte D<sup>w</sup> antibody;**  
arbitrary concentration(20 °C; procedure)  
**NPU20513**  
P—Erythrocyte D<sup>w</sup> antibody; arb.c.(20 °C; proc.) = ?

**Plasma—**  
**Erythrocyte D<sup>w</sup> antibody;**  
arbitrary concentration(37 °C; procedure)  
**NPU20514**  
P—Erythrocyte D<sup>w</sup> antibody; arb.c.(37 °C; proc.) = ?

**Plasma—**  
**Erythrocyte D<sup>w</sup> antibody;**  
arbitrary substance concentration(20 °C; procedure)  
arbitrary unit/litre  
**NPU20965**  
P—Erythrocyte D<sup>w</sup> antibody; arb.subst.c.(20 °C; proc.) = ?  
arb.unit/l

**Plasma—**  
**Erythrocyte D<sup>w</sup> antibody;**  
arbitrary substance concentration(37 °C; procedure)  
arbitrary unit/litre  
**NPU20966**  
P—Erythrocyte D<sup>w</sup> antibody; arb.subst.c.(37 °C; proc.) = ?  
arb.unit/l

**Erythrocytes(Blood)—**  
**Erythrocyte D<sup>w</sup> antigen;**  
arbitrary number(procedure)  
**NPU20242**  
Ercs(B)—Erythrocyte D<sup>w</sup> antigen; arb.num.(proc.) = ?

**Plasma—**  
**Erythrocyte DANE antibody;**  
arbitrary concentration(20 °C; procedure)  
**NPU20493**  
P—Erythrocyte DANE antibody; arb.c.(20 °C; proc.) = ?

**Plasma—**  
**Erythrocyte DANE antibody;**  
arbitrary concentration(37 °C; procedure)  
**NPU20494**  
P—Erythrocyte DANE antibody; arb.c.(37 °C; proc.) = ?

**Plasma—**  
**Erythrocyte DANE antibody;**  
arbitrary substance concentration(20 °C; procedure)  
arbitrary unit/litre  
**NPU20945**  
P—Erythrocyte DANE antibody; arb.subst.c.(20 °C; proc.) = ?  
arb.unit/l

**Plasma—**  
**Erythrocyte DANE antibody;**  
arbitrary substance concentration(37 °C; procedure)  
arbitrary unit/litre  
**NPU20946**  
P—Erythrocyte DANE antibody; arb.subst.c.(37 °C; proc.) = ?  
arb.unit/l

**Erythrocytes(Blood)—**  
**Erythrocyte DANE antigen;**  
arbitrary number(procedure)  
**NPU20233**  
Ercs(B)—Erythrocyte DANE antigen; arb.num.(proc.) = ?

**Plasma—**  
**Erythrocyte Dantu antibody;**  
arbitrary concentration(20 °C; procedure)  
**NPU20497**  
P—Erythrocyte Dantu antibody; arb.c.(20 °C; proc.) = ?

**Plasma—**  
**Erythrocyte Dantu antibody;**  
arbitrary concentration(37 °C; procedure)  
**NPU20498**  
P—Erythrocyte Dantu antibody; arb.c.(37 °C; proc.) = ?

**Plasma—**  
**Erythrocyte Dantu antibody;**  
arbitrary substance concentration(20 °C; procedure)  
arbitrary unit/litre  
**NPU20949**  
P—Erythrocyte Dantu antibody; arb.subst.c.(20 °C; proc.) = ?  
arb.unit/l

**Plasma—**  
**Erythrocyte Dantu antibody;**  
arbitrary substance concentration(37 °C; procedure)  
arbitrary unit/litre  
**NPU20950**  
P—Erythrocyte Dantu antibody; arb.subst.c.(37 °C; proc.) = ?  
arb.unit/l

**Erythrocytes(Blood)—**  
**Erythrocyte Dantu antigen;**  
arbitrary number(procedure)  
**NPU20234**  
Ercs(B)—Erythrocyte Dantu antigen; arb.num.(proc.) = ?

**Plasma—**  
**Erythrocyte Dav antibody;**  
arbitrary concentration(20 °C; procedure)  
**NPU20499**  
P—Erythrocyte Dav antibody; arb.c.(20 °C; proc.) = ?

**Plasma—**  
**Erythrocyte Dav antibody;**  
arbitrary concentration(37 °C; procedure)  
**NPU20500**  
P—Erythrocyte Dav antibody; arb.c.(37 °C; proc.) = ?

**Plasma—**  
**Erythrocyte Dav antibody;**  
arbitrary substance concentration(20 °C; procedure)  
arbitrary unit/litre  
**NPU20951**  
P—Erythrocyte Dav antibody; arb.subst.c.(20 °C; proc.) = ?  
arb.unit/l

**Plasma—**  
**Erythrocyte Dav antibody;**  
arbitrary substance concentration(37 °C; procedure)  
arbitrary unit/litre  
**NPU20952**  
P—Erythrocyte Dav antibody; arb.subst.c.(37 °C; proc.) = ?  
arb.unit/l

**Erythrocytes(Blood)—**  
**Erythrocyte Dav antigen;**  
arbitrary number(procedure)  
**NPU20235**  
Ercs(B)—Erythrocyte Dav antigen; arb.num.(proc.) = ?

**Plasma—**  
**Erythrocyte Dh<sup>a</sup> antibody;**  
**arbitrary concentration(20 °C; procedure)**  
**NPU20501**  
P—Erythrocyte Dh<sup>a</sup> antibody; arb.c.(20 °C; proc.) = ?

**Plasma—**  
**Erythrocyte Dh<sup>a</sup> antibody;**  
**arbitrary concentration(37 °C; procedure)**  
**NPU20502**  
P—Erythrocyte Dh<sup>a</sup> antibody; arb.c.(37 °C; proc.) = ?

**Plasma—**  
**Erythrocyte Dh<sup>a</sup> antibody;**  
**arbitrary substance concentration(20 °C; procedure)**  
**arbitrary unit/litre**  
**NPU20953**  
P—Erythrocyte Dh<sup>a</sup> antibody; arb.subst.c.(20 °C; proc.) = ?  
arb.unit/l

**Plasma—**  
**Erythrocyte Dh<sup>a</sup> antibody;**  
**arbitrary substance concentration(37 °C; procedure)**  
**arbitrary unit/litre**  
**NPU20954**  
P—Erythrocyte Dh<sup>a</sup> antibody; arb.subst.c.(37 °C; proc.) = ?  
arb.unit/l

**Erythrocytes(Blood)—**  
**Erythrocyte Dh<sup>a</sup> antigen;**  
**arbitrary number(procedure)**  
**NPU20236**  
ErCs(B)—Erythrocyte Dh<sup>a</sup> antigen; arb.num.(proc.) = ?

**Plasma—**  
**Erythrocyte Di<sup>a</sup> antibody;**  
**arbitrary concentration(20 °C; procedure)**  
**NPU20503**  
P—Erythrocyte Di<sup>a</sup> antibody; arb.c.(20 °C; proc.) = ?

**Plasma—**  
**Erythrocyte Di<sup>a</sup> antibody;**  
**arbitrary concentration(37 °C; procedure)**  
**NPU20504**  
P—Erythrocyte Di<sup>a</sup> antibody; arb.c.(37 °C; proc.) = ?

**Plasma—**  
**Erythrocyte Di<sup>a</sup> antibody;**  
**arbitrary substance concentration(20 °C; procedure)**  
**arbitrary unit/litre**  
**NPU20955**  
P—Erythrocyte Di<sup>a</sup> antibody; arb.subst.c.(20 °C; proc.) = ?  
arb.unit/l

**Plasma—**  
**Erythrocyte Di<sup>a</sup> antibody;**  
**arbitrary substance concentration(37 °C; procedure)**  
**arbitrary unit/litre**  
**NPU20956**  
P—Erythrocyte Di<sup>a</sup> antibody; arb.subst.c.(37 °C; proc.) = ?  
arb.unit/l

**Erythrocytes(Blood)—**  
**Erythrocyte Di<sup>a</sup> antigen;**  
**arbitrary number(procedure)**  
**NPU20237**  
ErCs(B)—Erythrocyte Di<sup>a</sup> antigen; arb.num.(proc.) = ?

**Plasma—**  
**Erythrocyte Di<sup>b</sup> antibody;**  
**arbitrary concentration(20 °C; procedure)**  
**NPU20505**  
P—Erythrocyte Di<sup>b</sup> antibody; arb.c.(20 °C; proc.) = ?

**Plasma—**  
**Erythrocyte Di<sup>b</sup> antibody;**  
**arbitrary concentration(37 °C; procedure)**  
**NPU20506**  
P—Erythrocyte Di<sup>b</sup> antibody; arb.c.(37 °C; proc.) = ?

**Plasma—**  
**Erythrocyte Di<sup>b</sup> antibody;**  
**arbitrary substance concentration(20 °C; procedure)**  
**arbitrary unit/litre**  
**NPU20957**  
P—Erythrocyte Di<sup>b</sup> antibody; arb.subst.c.(20 °C; proc.) = ?  
arb.unit/l

**Plasma—**  
**Erythrocyte Di<sup>b</sup> antibody;**  
**arbitrary substance concentration(37 °C; procedure)**  
**arbitrary unit/litre**  
**NPU20958**  
P—Erythrocyte Di<sup>b</sup> antibody; arb.subst.c.(37 °C; proc.) = ?  
arb.unit/l

**Erythrocytes(Blood)—**  
**Erythrocyte Di<sup>b</sup> antigen;**  
**arbitrary number(procedure)**  
**NPU20238**  
ErCs(B)—Erythrocyte Di<sup>b</sup> antigen; arb.num.(proc.) = ?

**Plasma—**  
**Erythrocyte Do<sup>a</sup> antibody;**  
**arbitrary concentration(20 °C; procedure)**  
**NPU20507**  
P—Erythrocyte Do<sup>a</sup> antibody; arb.c.(20 °C; proc.) = ?

**Plasma—**  
**Erythrocyte Do<sup>a</sup> antibody;**  
**arbitrary concentration(37 °C; procedure)**  
**NPU20508**  
P—Erythrocyte Do<sup>a</sup> antibody; arb.c.(37 °C; proc.) = ?

**Plasma—**  
**Erythrocyte Do<sup>a</sup> antibody;**  
**arbitrary substance concentration(20 °C; procedure)**  
**arbitrary unit/litre**  
**NPU20959**  
P—Erythrocyte Do<sup>a</sup> antibody; arb.subst.c.(20 °C; proc.) = ?  
arb.unit/l

**Plasma—**  
**Erythrocyte Do<sup>a</sup> antibody;**  
**arbitrary substance concentration(37 °C; procedure)**  
**arbitrary unit/litre**  
**NPU20960**  
P—Erythrocyte Do<sup>a</sup> antibody; arb.subst.c.(37 °C; proc.) = ?  
arb.unit/l

**Erythrocytes(Blood)—**  
**Erythrocyte Do<sup>a</sup> antigen;**  
**arbitrary number(procedure)**  
**NPU20239**  
ErCs(B)—Erythrocyte Do<sup>a</sup> antigen; arb.num.(proc.) = ?

**Plasma—**  
**Erythrocyte Do<sup>b</sup> antibody;**  
**arbitrary concentration(20 °C; procedure)**  
**NPU20509**  
P—Erythrocyte Do<sup>b</sup> antibody; arb.c.(20 °C; proc.) = ?

**Plasma—**  
**Erythrocyte Do<sup>b</sup> antibody;**  
**arbitrary concentration(37 °C; procedure)**  
**NPU20510**  
P—Erythrocyte Do<sup>b</sup> antibody; arb.c.(37 °C; proc.) = ?

**Plasma—**  
**Erythrocyte Do<sup>b</sup>antibody;**  
arbitrary substance concentration(20 °C; procedure)  
arbitrary unit/litre  
**NPU20961**  
P—Erythrocyte Do<sup>b</sup>antibody; arb.subst.c.(20 °C; proc.) = ?  
arb.unit/l

**Plasma—**  
**Erythrocyte Do<sup>b</sup>antibody;**  
arbitrary substance concentration(37 °C; procedure)  
arbitrary unit/litre  
**NPU20962**  
P—Erythrocyte Do<sup>b</sup>antibody; arb.subst.c.(37 °C; proc.) = ?  
arb.unit/l

**Erythrocytes(Blood)—**  
**Erythrocyte Do<sup>b</sup>antigen;**  
arbitrary number(procedure)  
**NPU20240**  
ErCs(B)—Erythrocyte Do<sup>b</sup>antigen; arb.num.(proc.) = ?

**Plasma—**  
**Erythrocyte Dr<sup>a</sup> antibody;**  
arbitrary concentration(20 °C; procedure)  
**NPU20511**  
P—Erythrocyte Dr<sup>a</sup> antibody; arb.c.(20 °C; proc.) = ?

**Plasma—**  
**Erythrocyte Dr<sup>a</sup> antibody;**  
arbitrary concentration(37 °C; procedure)  
**NPU20512**  
P—Erythrocyte Dr<sup>a</sup> antibody; arb.c.(37 °C; proc.) = ?

**Plasma—**  
**Erythrocyte Dr<sup>a</sup> antibody;**  
arbitrary substance concentration(20 °C; procedure)  
arbitrary unit/litre  
**NPU20963**  
P—Erythrocyte Dr<sup>a</sup> antibody; arb.subst.c.(20 °C; proc.) = ?  
arb.unit/l

**Plasma—**  
**Erythrocyte Dr<sup>a</sup> antibody;**  
arbitrary substance concentration(37 °C; procedure)  
arbitrary unit/litre  
**NPU20964**  
P—Erythrocyte Dr<sup>a</sup> antibody; arb.subst.c.(37 °C; proc.) = ?  
arb.unit/l

**Erythrocytes(Blood)—**  
**Erythrocyte Dr<sup>a</sup> antigen;**  
arbitrary number(procedure)  
**NPU20241**  
ErCs(B)—Erythrocyte Dr<sup>a</sup> antigen; arb.num.(proc.) = ?

**Plasma—**  
**Erythrocyte E antibody;**  
arbitrary concentration(20 °C; procedure)  
**NPU20515**  
P—Erythrocyte E antibody; arb.c.(20 °C; proc.) = ?

**Plasma—**  
**Erythrocyte e antibody;**  
arbitrary concentration(20 °C; procedure)  
**NPU20516**  
P—Erythrocyte e antibody; arb.c.(20 °C; proc.) = ?

**Plasma—**  
**Erythrocyte E antibody;**  
arbitrary concentration(37 °C; procedure)  
**NPU20517**  
P—Erythrocyte E antibody; arb.c.(37 °C; proc.) = ?

**Plasma—**  
**Erythrocyte e antibody;**  
arbitrary concentration(37 °C; procedure)  
**NPU20518**  
P—Erythrocyte e antibody; arb.c.(37 °C; proc.) = ?

**Plasma—**  
**Erythrocyte E antibody;**  
arbitrary substance concentration(20 °C; procedure)  
arbitrary unit/litre  
**NPU20967**  
P—Erythrocyte E antibody; arb.subst.c.(20 °C; proc.) = ?  
arb.unit/l

**Plasma—**  
**Erythrocyte e antibody;**  
arbitrary substance concentration(20 °C; procedure)  
arbitrary unit/litre  
**NPU20968**  
P—Erythrocyte e antibody; arb.subst.c.(20 °C; proc.) = ?  
arb.unit/l

**Plasma—**  
**Erythrocyte E antibody;**  
arbitrary substance concentration(37 °C; procedure)  
arbitrary unit/litre  
**NPU20969**  
P—Erythrocyte E antibody; arb.subst.c.(37 °C; proc.) = ?  
arb.unit/l

**Plasma—**  
**Erythrocyte e antibody;**  
arbitrary substance concentration(37 °C; procedure)  
arbitrary unit/litre  
**NPU20970**  
P—Erythrocyte e antibody; arb.subst.c.(37 °C; proc.) = ?  
arb.unit/l

**Erythrocytes(Blood)—**  
**Erythrocyte E antigen;**  
arbitrary number(procedure)  
**NPU20243**  
ErCs(B)—Erythrocyte E antigen; arb.num.(proc.) = ?

**Erythrocytes(Blood)—**  
**Erythrocyte e antigen;**  
arbitrary number(procedure)  
**NPU20244**  
ErCs(B)—Erythrocyte e antigen; arb.num.(proc.) = ?

**Plasma—**  
**Erythrocyte E<sup>w</sup> antibody;**  
arbitrary concentration(20 °C; procedure)  
**NPU20537**  
P—Erythrocyte E<sup>w</sup> antibody; arb.c.(20 °C; proc.) = ?

**Plasma—**  
**Erythrocyte E<sup>w</sup> antibody;**  
arbitrary concentration(37 °C; procedure)  
**NPU20538**  
P—Erythrocyte E<sup>w</sup> antibody; arb.c.(37 °C; proc.) = ?

**Plasma—**  
**Erythrocyte E<sup>w</sup> antibody;**  
arbitrary substance concentration(20 °C; procedure)  
arbitrary unit/litre  
**NPU20989**  
P—Erythrocyte E<sup>w</sup> antibody; arb.subst.c.(20 °C; proc.) = ?  
arb.unit/l

**Plasma—**  
**Erythrocyte E<sup>w</sup> antibody;**  
arbitrary substance concentration(37 °C; procedure)  
arbitrary unit/litre  
**NPU20990**  
P—Erythrocyte E<sup>w</sup> antibody; arb.subst.c.(37 °C; proc.) = ?  
arb.unit/l

**Erythrocytes(Blood)—**  
**Erythrocyte E<sup>w</sup> antigen;**  
**arbitrary number(procedure)**  
**NPU20254**  
ErCs(B)—Erythrocyte E<sup>w</sup> antigen; arb.num.(proc.) = ?

**Plasma—**  
**Erythrocyte ELO antibody;**  
**arbitrary concentration(20 °C; procedure)**  
**NPU20519**  
P—Erythrocyte ELO antibody; arb.c.(20 °C; proc.) = ?

**Plasma—**  
**Erythrocyte ELO antibody;**  
**arbitrary concentration(37 °C; procedure)**  
**NPU20520**  
P—Erythrocyte ELO antibody; arb.c.(37 °C; proc.) = ?

**Plasma—**  
**Erythrocyte ELO antibody;**  
**arbitrary substance concentration(20 °C; procedure)**  
**arbitrary unit/litre**  
**NPU20971**  
P—Erythrocyte ELO antibody; arb.subst.c.(20 °C; proc.) = ?  
arb.unit/l

**Plasma—**  
**Erythrocyte ELO antibody;**  
**arbitrary substance concentration(37 °C; procedure)**  
**arbitrary unit/litre**  
**NPU20972**  
P—Erythrocyte ELO antibody; arb.subst.c.(37 °C; proc.) = ?  
arb.unit/l

**Erythrocytes(Blood)—**  
**Erythrocyte ELO antigen;**  
**arbitrary number(procedure)**  
**NPU20245**  
ErCs(B)—Erythrocyte ELO antigen; arb.num.(proc.) = ?

**Plasma—**  
**Erythrocyte En<sup>a</sup> antibody;**  
**arbitrary concentration(20 °C; procedure)**  
**NPU20521**  
P—Erythrocyte En<sup>a</sup> antibody; arb.c.(20 °C; proc.) = ?

**Plasma—**  
**Erythrocyte En<sup>a</sup> antibody;**  
**arbitrary concentration(37 °C; procedure)**  
**NPU20522**  
P—Erythrocyte En<sup>a</sup> antibody; arb.c.(37 °C; proc.) = ?

**Plasma—**  
**Erythrocyte En<sup>a</sup> antibody;**  
**arbitrary substance concentration(20 °C; procedure)**  
**arbitrary unit/litre**  
**NPU20973**  
P—Erythrocyte En<sup>a</sup> antibody; arb.subst.c.(20 °C; proc.) = ?  
arb.unit/l

**Plasma—**  
**Erythrocyte En<sup>a</sup> antibody;**  
**arbitrary substance concentration(37 °C; procedure)**  
**arbitrary unit/litre**  
**NPU20974**  
P—Erythrocyte En<sup>a</sup> antibody; arb.subst.c.(37 °C; proc.) = ?  
arb.unit/l

**Erythrocytes(Blood)—**  
**Erythrocyte En<sup>a</sup> antigen;**  
**arbitrary number(procedure)**  
**NPU20246**  
ErCs(B)—Erythrocyte En<sup>a</sup> antigen; arb.num.(proc.) = ?

**Plasma—**  
**Erythrocyte ENAV antibody;**  
**arbitrary concentration(20 °C; procedure)**  
**NPU20523**  
P—Erythrocyte ENAV antibody; arb.c.(20 °C; proc.) = ?

**Plasma—**  
**Erythrocyte ENAV antibody;**  
**arbitrary concentration(37 °C; procedure)**  
**NPU20524**  
P—Erythrocyte ENAV antibody; arb.c.(37 °C; proc.) = ?

**Plasma—**  
**Erythrocyte ENAV antibody;**  
**arbitrary substance concentration(20 °C; procedure)**  
**arbitrary unit/litre**  
**NPU20975**  
P—Erythrocyte ENAV antibody; arb.subst.c.(20 °C; proc.) = ?  
arb.unit/l

**Plasma—**  
**Erythrocyte ENAV antibody;**  
**arbitrary substance concentration(37 °C; procedure)**  
**arbitrary unit/litre**  
**NPU20976**  
P—Erythrocyte ENAV antibody; arb.subst.c.(37 °C; proc.) = ?  
arb.unit/l

**Erythrocytes(Blood)—**  
**Erythrocyte ENAV antigen;**  
**arbitrary number(procedure)**  
**NPU20247**  
ErCs(B)—Erythrocyte ENAV antigen; arb.num.(proc.) = ?

**Plasma—**  
**Erythrocyte ENEH antibody;**  
**arbitrary concentration(20 °C; procedure)**  
**NPU20525**  
P—Erythrocyte ENEH antibody; arb.c.(20 °C; proc.) = ?

**Plasma—**  
**Erythrocyte ENEH antibody;**  
**arbitrary concentration(37 °C; procedure)**  
**NPU20526**  
P—Erythrocyte ENEH antibody; arb.c.(37 °C; proc.) = ?

**Plasma—**  
**Erythrocyte ENEH antibody;**  
**arbitrary substance concentration(20 °C; procedure)**  
**arbitrary unit/litre**  
**NPU20977**  
P—Erythrocyte ENEH antibody; arb.subst.c.(20 °C; proc.) = ?  
arb.unit/l

**Plasma—**  
**Erythrocyte ENEH antibody;**  
**arbitrary substance concentration(37 °C; procedure)**  
**arbitrary unit/litre**  
**NPU20978**  
P—Erythrocyte ENEH antibody; arb.subst.c.(37 °C; proc.) = ?  
arb.unit/l

**Erythrocytes(Blood)—**  
**Erythrocyte ENEH antigen;**  
**arbitrary number(procedure)**  
**NPU20248**  
ErCs(B)—Erythrocyte ENEH antigen; arb.num.(proc.) = ?

**Plasma—**  
**Erythrocyte ENEP antibody;**  
**arbitrary concentration(20 °C; procedure)**  
**NPU20527**  
P—Erythrocyte ENEP antibody; arb.c.(20 °C; proc.) = ?

**Plasma—**  
**Erythrocyte ENEP antibody;**  
**arbitrary concentration(37 °C; procedure)**  
**NPU20528**  
P—Erythrocyte ENEP antibody; arb.c.(37 °C; proc.) = ?

**Plasma—**  
**Erythrocyte ENEP antibody;**  
**arbitrary substance concentration(20 °C; procedure)**  
**arbitrary unit/litre**  
**NPU20979**  
P—Erythrocyte ENEP antibody; arb.subst.c.(20 °C; proc.) = ?  
arb.unit/l

**Plasma—**  
**Erythrocyte ENEP antibody;**  
**arbitrary substance concentration(37 °C; procedure)**  
**arbitrary unit/litre**  
**NPU20980**  
P—Erythrocyte ENEP antibody; arb.subst.c.(37 °C; proc.) = ?  
arb.unit/l

**Erythrocytes(Blood)—**  
**Erythrocyte ENEP antigen;**  
**arbitrary number(procedure)**  
**NPU20249**  
ErCs(B)—Erythrocyte ENEP antigen; arb.num.(proc.) = ?

**Plasma—**  
**Erythrocyte ENKT antibody;**  
**arbitrary concentration(20 °C; procedure)**  
**NPU20529**  
P—Erythrocyte ENKT antibody; arb.c.(20 °C; proc.) = ?

**Plasma—**  
**Erythrocyte ENKT antibody;**  
**arbitrary concentration(37 °C; procedure)**  
**NPU20530**  
P—Erythrocyte ENKT antibody; arb.c.(37 °C; proc.) = ?

**Plasma—**  
**Erythrocyte ENKT antibody;**  
**arbitrary substance concentration(20 °C; procedure)**  
**arbitrary unit/litre**  
**NPU20981**  
P—Erythrocyte ENKT antibody; arb.subst.c.(20 °C; proc.) = ?  
arb.unit/l

**Plasma—**  
**Erythrocyte ENKT antibody;**  
**arbitrary substance concentration(37 °C; procedure)**  
**arbitrary unit/litre**  
**NPU20982**  
P—Erythrocyte ENKT antibody; arb.subst.c.(37 °C; proc.) = ?  
= ? arb.unit/l

**Erythrocytes(Blood)—**  
**Erythrocyte ENKT antigen;**  
**arbitrary number(procedure)**  
**NPU20250**  
ErCs(B)—Erythrocyte ENKT antigen; arb.num.(proc.) = ?

**Plasma—**  
**Erythrocyte ERIK antibody;**  
**arbitrary concentration(20 °C; procedure)**  
**NPU20531**  
P—Erythrocyte ERIK antibody; arb.c.(20 °C; proc.) = ?

**Plasma—**  
**Erythrocyte ERIK antibody;**  
**arbitrary concentration(37 °C; procedure)**  
**NPU20532**  
P—Erythrocyte ERIK antibody; arb.c.(37 °C; proc.) = ?

**Plasma—**  
**Erythrocyte ERIK antibody;**  
**arbitrary substance concentration(20 °C; procedure)**  
**arbitrary unit/litre**  
**NPU20983**  
P—Erythrocyte ERIK antibody; arb.subst.c.(20 °C; proc.) = ?  
arb.unit/l

**Plasma—**  
**Erythrocyte ERIK antibody;**  
**arbitrary substance concentration(37 °C; procedure)**  
**arbitrary unit/litre**  
**NPU20984**  
P—Erythrocyte ERIK antibody; arb.subst.c.(37 °C; proc.) = ?  
arb.unit/l

**Erythrocytes(Blood)—**  
**Erythrocyte ERIK antigen;**  
**arbitrary number(procedure)**  
**NPU20251**  
ErCs(B)—Erythrocyte ERIK antigen; arb.num.(proc.) = ?

**Plasma—**  
**Erythrocyte Es<sup>a</sup> antibody;**  
**arbitrary concentration(20 °C; procedure)**  
**NPU20533**  
P—Erythrocyte Es<sup>a</sup> antibody; arb.c.(20 °C; proc.) = ?

**Plasma—**  
**Erythrocyte Es<sup>a</sup> antibody;**  
**arbitrary concentration(37 °C; procedure)**  
**NPU20534**  
P—Erythrocyte Es<sup>a</sup> antibody; arb.c.(37 °C; proc.) = ?

**Plasma—**  
**Erythrocyte Es<sup>a</sup> antibody;**  
**arbitrary substance concentration(20 °C; procedure)**  
**arbitrary unit/litre**  
**NPU20985**  
P—Erythrocyte Es<sup>a</sup> antibody; arb.subst.c.(20 °C; proc.) = ?  
arb.unit/l

**Plasma—**  
**Erythrocyte Es<sup>a</sup> antibody;**  
**arbitrary substance concentration(37 °C; procedure)**  
**arbitrary unit/litre**  
**NPU20986**  
P—Erythrocyte Es<sup>a</sup> antibody; arb.subst.c.(37 °C; proc.) = ?  
arb.unit/l

**Erythrocytes(Blood)—**  
**Erythrocyte Es<sup>a</sup> antigen;**  
**arbitrary number(procedure)**  
**NPU20252**  
ErCs(B)—Erythrocyte Es<sup>a</sup> antigen; arb.num.(proc.) = ?

**Plasma—**  
**Erythrocyte Evans antibody;**  
**arbitrary concentration(20 °C; procedure)**  
**NPU20535**  
P—Erythrocyte Evans antibody; arb.c.(20 °C; proc.) = ?

**Plasma—**  
**Erythrocyte Evans antibody;**  
**arbitrary concentration(37 °C; procedure)**  
**NPU20536**  
P—Erythrocyte Evans antibody; arb.c.(37 °C; proc.) = ?

**Plasma—**  
**Erythrocyte Evans antibody;**  
**arbitrary substance concentration(20 °C; procedure)**  
**arbitrary unit/litre**  
**NPU20987**  
P—Erythrocyte Evans antibody; arb.subst.c.(20 °C; proc.) = ?  
arb.unit/l

**Plasma—**  
**Erythrocyte Evans antibody;**  
arbitrary substance concentration(37 °C; procedure)  
arbitrary unit/litre  
**NPU20988**  
P—Erythrocyte Evans antibody; arb.subst.c.(37 °C; proc.) = ?  
arb.unit/l

**Erythrocytes(Blood)—**  
**Erythrocyte Evans antigen;**  
arbitrary number(procedure)  
**NPU20253**  
Ercs(B)—Erythrocyte Evans antigen; arb.num.(proc.) = ?

**Plasma—**  
**Erythrocyte f antibody;**  
arbitrary concentration(20 °C; procedure)  
**NPU20539**  
P—Erythrocyte f antibody; arb.c.(20 °C; proc.) = ?

**Plasma—**  
**Erythrocyte f antibody;**  
arbitrary concentration(37 °C; procedure)  
**NPU20540**  
P—Erythrocyte f antibody; arb.c.(37 °C; proc.) = ?

**Plasma—**  
**Erythrocyte f antibody;**  
arbitrary substance concentration(20 °C; procedure)  
arbitrary unit/litre  
**NPU20991**  
P—Erythrocyte f antibody; arb.subst.c.(20 °C; proc.) = ?  
arb.unit/l

**Plasma—**  
**Erythrocyte f antibody;**  
arbitrary substance concentration(37 °C; procedure)  
arbitrary unit/litre  
**NPU20992**  
P—Erythrocyte f antibody; arb.subst.c.(37 °C; proc.) = ?  
arb.unit/l

**Erythrocytes(Blood)—**  
**Erythrocyte f antigen;**  
arbitrary number(procedure)  
**NPU20255**  
Ercs(B)—Erythrocyte f antigen; arb.num.(proc.) = ?

**Plasma—**  
**Erythrocyte Far antibody;**  
arbitrary concentration(20 °C; procedure)  
**NPU20541**  
P—Erythrocyte Far antibody; arb.c.(20 °C; proc.) = ?

**Plasma—**  
**Erythrocyte Far antibody;**  
arbitrary concentration(37 °C; procedure)  
**NPU20542**  
P—Erythrocyte Far antibody; arb.c.(37 °C; proc.) = ?

**Plasma—**  
**Erythrocyte Far antibody;**  
arbitrary substance concentration(20 °C; procedure)  
arbitrary unit/litre  
**NPU20993**  
P—Erythrocyte Far antibody; arb.subst.c.(20 °C; proc.) = ?  
arb.unit/l

**Plasma—**  
**Erythrocyte Far antibody;**  
arbitrary substance concentration(37 °C; procedure)  
arbitrary unit/litre  
**NPU20994**  
P—Erythrocyte Far antibody; arb.subst.c.(37 °C; proc.) = ?  
arb.unit/l

**Erythrocytes(Blood)—**  
**Erythrocyte Far antigen;**  
arbitrary number(procedure)  
**NPU20256**  
Ercs(B)—Erythrocyte Far antigen; arb.num.(proc.) = ?

**Plasma—**  
**Erythrocyte FPTT antibody;**  
arbitrary concentration(20 °C; procedure)  
**NPU20543**  
P—Erythrocyte FPTT antibody; arb.c.(20 °C; proc.) = ?

**Plasma—**  
**Erythrocyte FPTT antibody;**  
arbitrary concentration(37 °C; procedure)  
**NPU20544**  
P—Erythrocyte FPTT antibody; arb.c.(37 °C; proc.) = ?

**Plasma—**  
**Erythrocyte FPTT antibody;**  
arbitrary substance concentration(20 °C; procedure)  
arbitrary unit/litre  
**NPU20995**  
P—Erythrocyte FPTT antibody; arb.subst.c.(20 °C; proc.) = ?  
arb.unit/l

**Plasma—**  
**Erythrocyte FPTT antibody;**  
arbitrary substance concentration(37 °C; procedure)  
arbitrary unit/litre  
**NPU20996**  
P—Erythrocyte FPTT antibody; arb.subst.c.(37 °C; proc.) = ?  
arb.unit/l

**Erythrocytes(Blood)—**  
**Erythrocyte FPTT antigen;**  
arbitrary number(procedure)  
**NPU20257**  
Ercs(B)—Erythrocyte FPTT antigen; arb.num.(proc.) = ?

**Plasma—**  
**Erythrocyte Fr<sup>a</sup> antibody;**  
arbitrary concentration(20 °C; procedure)  
**NPU20545**  
P—Erythrocyte Fr<sup>a</sup> antibody; arb.c.(20 °C; proc.) = ?

**Plasma—**  
**Erythrocyte Fr<sup>a</sup> antibody;**  
arbitrary concentration(37 °C; procedure)  
**NPU20546**  
P—Erythrocyte Fr<sup>a</sup> antibody; arb.c.(37 °C; proc.) = ?

**Plasma—**  
**Erythrocyte Fr<sup>a</sup> antibody;**  
arbitrary substance concentration(20 °C; procedure)  
arbitrary unit/litre  
**NPU20997**  
P—Erythrocyte Fr<sup>a</sup> antibody; arb.subst.c.(20 °C; proc.) = ?  
arb.unit/l

**Plasma—**  
**Erythrocyte Fr<sup>a</sup> antibody;**  
arbitrary substance concentration(37 °C; procedure)  
arbitrary unit/litre  
**NPU20998**  
P—Erythrocyte Fr<sup>a</sup> antibody; arb.subst.c.(37 °C; proc.) = ?  
arb.unit/l

**Erythrocytes(Blood)—**  
**Erythrocyte Fr<sup>a</sup> antigen;**  
arbitrary number(procedure)  
**NPU20258**  
Ercs(B)—Erythrocyte Fr<sup>a</sup> antigen; arb.num.(proc.) = ?

**Plasma—**  
**Erythrocyte Fy<sup>a</sup> antibody;**  
**arbitrary concentration(20 °C; procedure)**  
**NPU20555**  
 P—Erythrocyte Fy<sup>a</sup> antibody; arb.c.(20 °C; proc.) = ?

**Plasma—**  
**Erythrocyte Fy<sup>a</sup> antibody;**  
**arbitrary concentration(37 °C; procedure)**  
**NPU20556**  
 P—Erythrocyte Fy<sup>a</sup> antibody; arb.c.(37 °C; proc.) = ?

**Plasma—**  
**Erythrocyte Fy<sup>a</sup> antibody;**  
**arbitrary substance concentration(20 °C; procedure)**  
**arbitrary unit/litre**  
**NPU21007**  
 P—Erythrocyte Fy<sup>a</sup> antibody; arb.subst.c.(20 °C; proc.) = ?  
 arb.unit/l

**Plasma—**  
**Erythrocyte Fy<sup>a</sup> antibody;**  
**arbitrary substance concentration(37 °C; procedure)**  
**arbitrary unit/litre**  
**NPU21008**  
 P—Erythrocyte Fy<sup>a</sup> antibody; arb.subst.c.(37 °C; proc.) = ?  
 arb.unit/l

**Erythrocytes(Blood)—**  
**Erythrocyte Fy<sup>a</sup> antigen;**  
**arbitrary number(procedure)**  
**NPU20263**  
 ErCs(B)—Erythrocyte Fy<sup>a</sup> antigen; arb.num.(proc.) = ?

**Plasma—**  
**Erythrocyte Fy<sup>b</sup> antibody;**  
**arbitrary concentration(20 °C; procedure)**  
**NPU20557**  
 P—Erythrocyte Fy<sup>b</sup> antibody; arb.c.(20 °C; proc.) = ?

**Plasma—**  
**Erythrocyte Fy<sup>b</sup> antibody;**  
**arbitrary concentration(37 °C; procedure)**  
**NPU20558**  
 P—Erythrocyte Fy<sup>b</sup> antibody; arb.c.(37 °C; proc.) = ?

**Plasma—**  
**Erythrocyte Fy<sup>b</sup> antibody;**  
**arbitrary substance concentration(20 °C; procedure)**  
**arbitrary unit/litre**  
**NPU21009**  
 P—Erythrocyte Fy<sup>b</sup> antibody; arb.subst.c.(20 °C; proc.) = ?  
 arb.unit/l

**Plasma—**  
**Erythrocyte Fy<sup>b</sup> antibody;**  
**arbitrary substance concentration(37 °C; procedure)**  
**arbitrary unit/litre**  
**NPU21010**  
 P—Erythrocyte Fy<sup>b</sup> antibody; arb.subst.c.(37 °C; proc.) = ?  
 arb.unit/l

**Erythrocytes(Blood)—**  
**Erythrocyte Fy<sup>b</sup> antigen;**  
**arbitrary number(procedure)**  
**NPU20264**  
 ErCs(B)—Erythrocyte Fy<sup>b</sup> antigen; arb.num.(proc.) = ?

**Plasma—**  
**Erythrocyte Fy3 antibody;**  
**arbitrary concentration(20 °C; procedure)**  
**NPU20547**  
 P—Erythrocyte Fy3 antibody; arb.c.(20 °C; proc.) = ?

**Plasma—**  
**Erythrocyte Fy3 antibody;**  
**arbitrary concentration(37 °C; procedure)**  
**NPU20548**  
 P—Erythrocyte Fy3 antibody; arb.c.(37 °C; proc.) = ?

**Plasma—**  
**Erythrocyte Fy3 antibody;**  
**arbitrary substance concentration(20 °C; procedure)**  
**arbitrary unit/litre**  
**NPU20999**  
 P—Erythrocyte Fy3 antibody; arb.subst.c.(20 °C; proc.) = ?  
 arb.unit/l

**Plasma—**  
**Erythrocyte Fy3 antibody;**  
**arbitrary substance concentration(37 °C; procedure)**  
**arbitrary unit/litre**  
**NPU21000**  
 P—Erythrocyte Fy3 antibody; arb.subst.c.(37 °C; proc.) = ?  
 arb.unit/l

**Erythrocytes(Blood)—**  
**Erythrocyte Fy3 antigen;**  
**arbitrary number(procedure)**  
**NPU20259**  
 ErCs(B)—Erythrocyte Fy3 antigen; arb.num.(proc.) = ?

**Plasma—**  
**Erythrocyte Fy4 antibody;**  
**arbitrary concentration(20 °C; procedure)**  
**NPU20549**  
 P—Erythrocyte Fy4 antibody; arb.c.(20 °C; proc.) = ?

**Plasma—**  
**Erythrocyte Fy4 antibody;**  
**arbitrary concentration(37 °C; procedure)**  
**NPU20550**  
 P—Erythrocyte Fy4 antibody; arb.c.(37 °C; proc.) = ?

**Plasma—**  
**Erythrocyte Fy4 antibody;**  
**arbitrary substance concentration(20 °C; procedure)**  
**arbitrary unit/litre**  
**NPU21001**  
 P—Erythrocyte Fy4 antibody; arb.subst.c.(20 °C; proc.) = ?  
 arb.unit/l

**Plasma—**  
**Erythrocyte Fy4 antibody;**  
**arbitrary substance concentration(37 °C; procedure)**  
**arbitrary unit/litre**  
**NPU21002**  
 P—Erythrocyte Fy4 antibody; arb.subst.c.(37 °C; proc.) = ?  
 arb.unit/l

**Erythrocytes(Blood)—**  
**Erythrocyte Fy4 antigen;**  
**arbitrary number(procedure)**  
**NPU20260**  
 ErCs(B)—Erythrocyte Fy4 antigen; arb.num.(proc.) = ?

**Plasma—**  
**Erythrocyte Fy5 antibody;**  
**arbitrary concentration(20 °C; procedure)**  
**NPU20551**  
 P—Erythrocyte Fy5 antibody; arb.c.(20 °C; proc.) = ?

**Plasma—**  
**Erythrocyte Fy5 antibody;**  
**arbitrary concentration(37 °C; procedure)**  
**NPU20552**  
 P—Erythrocyte Fy5 antibody; arb.c.(37 °C; proc.) = ?

**Plasma—**  
**Erythrocyte Fy5 antibody;**  
arbitrary substance concentration(20 °C; procedure)  
arbitrary unit/litre  
**NPU21003**  
P—Erythrocyte Fy5 antibody; arb.subst.c.(20 °C; proc.) = ?  
arb.unit/l

**Plasma—**  
**Erythrocyte Fy5 antibody;**  
arbitrary substance concentration(37 °C; procedure)  
arbitrary unit/litre  
**NPU21004**  
P—Erythrocyte Fy5 antibody; arb.subst.c.(37 °C; proc.) = ?  
arb.unit/l

**Erythrocytes(Blood)—**  
**Erythrocyte Fy5 antigen;**  
arbitrary number(procedure)  
**NPU20261**  
Ercs(B)—Erythrocyte Fy5 antigen; arb.num.(proc.) = ?

**Plasma—**  
**Erythrocyte Fy6 antibody;**  
arbitrary concentration(20 °C; procedure)  
**NPU20553**  
P—Erythrocyte Fy6 antibody; arb.c.(20 °C; proc.) = ?

**Plasma—**  
**Erythrocyte Fy6 antibody;**  
arbitrary concentration(37 °C; procedure)  
**NPU20554**  
P—Erythrocyte Fy6 antibody; arb.c.(37 °C; proc.) = ?

**Plasma—**  
**Erythrocyte Fy6 antibody;**  
arbitrary substance concentration(20 °C; procedure)  
arbitrary unit/litre  
**NPU21005**  
P—Erythrocyte Fy6 antibody; arb.subst.c.(20 °C; proc.) = ?  
arb.unit/l

**Plasma—**  
**Erythrocyte Fy6 antibody;**  
arbitrary substance concentration(37 °C; procedure)  
arbitrary unit/litre  
**NPU21006**  
P—Erythrocyte Fy6 antibody; arb.subst.c.(37 °C; proc.) = ?  
arb.unit/l

**Erythrocytes(Blood)—**  
**Erythrocyte Fy6 antigen;**  
arbitrary number(procedure)  
**NPU20262**  
Ercs(B)—Erythrocyte Fy6 antigen; arb.num.(proc.) = ?

**Plasma—**  
**Erythrocyte G antibody;**  
arbitrary concentration(20 °C; procedure)  
**NPU20559**  
P—Erythrocyte G antibody; arb.c.(20 °C; proc.) = ?

**Plasma—**  
**Erythrocyte G antibody;**  
arbitrary concentration(37 °C; procedure)  
**NPU20560**  
P—Erythrocyte G antibody; arb.c.(37 °C; proc.) = ?

**Plasma—**  
**Erythrocyte G antibody;**  
arbitrary substance concentration(20 °C; procedure)  
arbitrary unit/litre  
**NPU21011**  
P—Erythrocyte G antibody; arb.subst.c.(20 °C; proc.) = ?  
arb.unit/l

**Plasma—**  
**Erythrocyte G antibody;**  
arbitrary substance concentration(37 °C; procedure)  
arbitrary unit/litre  
**NPU21012**  
P—Erythrocyte G antibody; arb.subst.c.(37 °C; proc.) = ?  
arb.unit/l

**Erythrocytes(Blood)—**  
**Erythrocyte G antigen;**  
arbitrary number(procedure)  
**NPU20265**  
Ercs(B)—Erythrocyte G antigen; arb.num.(proc.) = ?

**Plasma—**  
**Erythrocyte Ge2 antibody;**  
arbitrary concentration(20 °C; procedure)  
**NPU20561**  
P—Erythrocyte Ge2 antibody; arb.c.(20 °C; proc.) = ?

**Plasma—**  
**Erythrocyte Ge2 antibody;**  
arbitrary concentration(37 °C; procedure)  
**NPU20562**  
P—Erythrocyte Ge2 antibody; arb.c.(37 °C; proc.) = ?

**Plasma—**  
**Erythrocyte Ge2 antibody;**  
arbitrary substance concentration(20 °C; procedure)  
arbitrary unit/litre  
**NPU21013**  
P—Erythrocyte Ge2 antibody; arb.subst.c.(20 °C; proc.) = ?  
arb.unit/l

**Plasma—**  
**Erythrocyte Ge2 antibody;**  
arbitrary substance concentration(37 °C; procedure)  
arbitrary unit/litre  
**NPU21014**  
P—Erythrocyte Ge2 antibody; arb.subst.c.(37 °C; proc.) = ?  
arb.unit/l

**Erythrocytes(Blood)—**  
**Erythrocyte Ge2 antigen;**  
arbitrary number(procedure)  
**NPU20266**  
Ercs(B)—Erythrocyte Ge2 antigen; arb.num.(proc.) = ?

**Plasma—**  
**Erythrocyte Ge3 antibody;**  
arbitrary concentration(20 °C; procedure)  
**NPU20563**  
P—Erythrocyte Ge3 antibody; arb.c.(20 °C; proc.) = ?

**Plasma—**  
**Erythrocyte Ge3 antibody;**  
arbitrary concentration(37 °C; procedure)  
**NPU20564**  
P—Erythrocyte Ge3 antibody; arb.c.(37 °C; proc.) = ?

**Plasma—**  
**Erythrocyte Ge3 antibody;**  
arbitrary substance concentration(20 °C; procedure)  
arbitrary unit/litre  
**NPU21015**  
P—Erythrocyte Ge3 antibody; arb.subst.c.(20 °C; proc.) = ?  
arb.unit/l

**Plasma—**  
**Erythrocyte Ge3 antibody;**  
arbitrary substance concentration(37 °C; procedure)  
arbitrary unit/litre  
**NPU21016**  
P—Erythrocyte Ge3 antibody; arb.subst.c.(37 °C; proc.) = ?  
arb.unit/l

**Erythrocytes(Blood)—**  
**Erythrocyte Ge3 antigen;**  
**arbitrary number(procedure)**  
**NPU20267**  
ErCs(B)—Erythrocyte Ge3 antigen; arb.num.(proc.) = ?

**Plasma—**  
**Erythrocyte Ge4 antibody;**  
**arbitrary concentration(20 °C; procedure)**  
**NPU20565**  
P—Erythrocyte Ge4 antibody; arb.c.(20 °C; proc.) = ?

**Plasma—**  
**Erythrocyte Ge4 antibody;**  
**arbitrary concentration(37 °C; procedure)**  
**NPU20566**  
P—Erythrocyte Ge4 antibody; arb.c.(37 °C; proc.) = ?

**Plasma—**  
**Erythrocyte Ge4 antibody;**  
**arbitrary substance concentration(20 °C; procedure)**  
**arbitrary unit/litre**  
**NPU21017**  
P—Erythrocyte Ge4 antibody; arb.subst.c.(20 °C; proc.) = ?  
arb.unit/l

**Plasma—**  
**Erythrocyte Ge4 antibody;**  
**arbitrary substance concentration(37 °C; procedure)**  
**arbitrary unit/litre**  
**NPU21018**  
P—Erythrocyte Ge4 antibody; arb.subst.c.(37 °C; proc.) = ?  
arb.unit/l

**Erythrocytes(Blood)—**  
**Erythrocyte Ge4 antigen;**  
**arbitrary number(procedure)**  
**NPU20268**  
ErCs(B)—Erythrocyte Ge4 antigen; arb.num.(proc.) = ?

**Plasma—**  
**Erythrocyte Go<sup>a</sup> antibody;**  
**arbitrary concentration(20 °C; procedure)**  
**NPU20567**  
P—Erythrocyte Go<sup>a</sup> antibody; arb.c.(20 °C; proc.) = ?

**Plasma—**  
**Erythrocyte Go<sup>a</sup> antibody;**  
**arbitrary concentration(37 °C; procedure)**  
**NPU20568**  
P—Erythrocyte Go<sup>a</sup> antibody; arb.c.(37 °C; proc.) = ?

**Plasma—**  
**Erythrocyte Go<sup>a</sup> antibody;**  
**arbitrary substance concentration(20 °C; procedure)**  
**arbitrary unit/litre**  
**NPU21019**  
P—Erythrocyte Go<sup>a</sup> antibody; arb.subst.c.(20 °C; proc.) = ?  
arb.unit/l

**Plasma—**  
**Erythrocyte Go<sup>a</sup> antibody;**  
**arbitrary substance concentration(37 °C; procedure)**  
**arbitrary unit/litre**  
**NPU21020**  
P—Erythrocyte Go<sup>a</sup> antibody; arb.subst.c.(37 °C; proc.) = ?  
arb.unit/l

**Erythrocytes(Blood)—**  
**Erythrocyte Go<sup>a</sup> antigen;**  
**arbitrary number(procedure)**  
**NPU20269**  
ErCs(B)—Erythrocyte Go<sup>a</sup> antigen; arb.num.(proc.) = ?

**Plasma—**  
**Erythrocyte Gy<sup>a</sup> antibody;**  
**arbitrary concentration(20 °C; procedure)**  
**NPU20569**  
P—Erythrocyte Gy<sup>a</sup> antibody; arb.c.(20 °C; proc.) = ?

**Plasma—**  
**Erythrocyte Gy<sup>a</sup> antibody;**  
**arbitrary concentration(37 °C; procedure)**  
**NPU20570**  
P—Erythrocyte Gy<sup>a</sup> antibody; arb.c.(37 °C; proc.) = ?

**Plasma—**  
**Erythrocyte Gy<sup>a</sup> antibody;**  
**arbitrary substance concentration(20 °C; procedure)**  
**arbitrary unit/litre**  
**NPU21021**  
P—Erythrocyte Gy<sup>a</sup> antibody; arb.subst.c.(20 °C; proc.) = ?  
arb.unit/l

**Plasma—**  
**Erythrocyte Gy<sup>a</sup> antibody;**  
**arbitrary substance concentration(37 °C; procedure)**  
**arbitrary unit/litre**  
**NPU21022**  
P—Erythrocyte Gy<sup>a</sup> antibody; arb.subst.c.(37 °C; proc.) = ?  
arb.unit/l

**Erythrocytes(Blood)—**  
**Erythrocyte Gy<sup>a</sup> antigen;**  
**arbitrary number(procedure)**  
**NPU20270**  
ErCs(B)—Erythrocyte Gy<sup>a</sup> antigen; arb.num.(proc.) = ?

**Plasma—**  
**Erythrocyte H antibody;**  
**arbitrary concentration(20 °C; procedure)**  
**NPU20573**  
P—Erythrocyte H antibody; arb.c.(20 °C; proc.) = ?

**Plasma—**  
**Erythrocyte H antibody;**  
**arbitrary concentration(37 °C; procedure)**  
**NPU20574**  
P—Erythrocyte H antibody; arb.c.(37 °C; proc.) = ?

**Plasma—**  
**Erythrocyte H antibody;**  
**arbitrary substance concentration(20 °C; procedure)**  
**arbitrary unit/litre**  
**NPU21025**  
P—Erythrocyte H antibody; arb.subst.c.(20 °C; proc.) = ?  
arb.unit/l

**Plasma—**  
**Erythrocyte H antibody;**  
**arbitrary substance concentration(37 °C; procedure)**  
**arbitrary unit/litre**  
**NPU21026**  
P—Erythrocyte H antibody; arb.subst.c.(37 °C; proc.) = ?  
arb.unit/l

**Erythrocytes(Blood)—**  
**Erythrocyte H antigen;**  
**arbitrary number(procedure)**  
**NPU20272**  
ErCs(B)—Erythrocyte H antigen; arb.num.(proc.) = ?

**Plasma—**  
**Erythrocyte HAG antibody;**  
**arbitrary concentration(20 °C; procedure)**  
**NPU20571**  
P—Erythrocyte HAG antibody; arb.c.(20 °C; proc.) = ?

**Plasma—**  
**Erythrocyte HAG antibody;**  
 arbitrary concentration(37 °C; procedure)  
 NPU20572  
 P—Erythrocyte HAG antibody; arb.c.(37 °C; proc.) = ?

**Plasma—**  
**Erythrocyte HAG antibody;**  
 arbitrary substance concentration(20 °C; procedure)  
 arbitrary unit/litre  
 NPU21023  
 P—Erythrocyte HAG antibody; arb.subst.c.(20 °C; proc.) = ?  
 arb.unit/l

**Plasma—**  
**Erythrocyte HAG antibody;**  
 arbitrary substance concentration(37 °C; procedure)  
 arbitrary unit/litre  
 NPU21024  
 P—Erythrocyte HAG antibody; arb.subst.c.(37 °C; proc.) = ?  
 arb.unit/l

**Erythrocytes(Blood)—**  
**Erythrocyte HAG antigen;**  
 arbitrary number(procedure)  
 NPU20271  
 ErCs(B)—Erythrocyte HAG antigen; arb.num.(proc.) = ?

**Plasma—**  
**Erythrocyte He antibody;**  
 arbitrary concentration(20 °C; procedure)  
 NPU20575  
 P—Erythrocyte He antibody; arb.c.(20 °C; proc.) = ?

**Plasma—**  
**Erythrocyte He antibody;**  
 arbitrary concentration(37 °C; procedure)  
 NPU20576  
 P—Erythrocyte He antibody; arb.c.(37 °C; proc.) = ?

**Plasma—**  
**Erythrocyte He antibody;**  
 arbitrary substance concentration(20 °C; procedure)  
 arbitrary unit/litre  
 NPU21027  
 P—Erythrocyte He antibody; arb.subst.c.(20 °C; proc.) = ?  
 arb.unit/l

**Plasma—**  
**Erythrocyte He antibody;**  
 arbitrary substance concentration(37 °C; procedure)  
 arbitrary unit/litre  
 NPU21028  
 P—Erythrocyte He antibody; arb.subst.c.(37 °C; proc.) = ?  
 arb.unit/l

**Erythrocytes(Blood)—**  
**Erythrocyte He antigen;**  
 arbitrary number(procedure)  
 NPU20273  
 ErCs(B)—Erythrocyte He antigen; arb.num.(proc.) = ?

**Plasma—**  
**Erythrocyte Hg<sup>a</sup> antibody;**  
 arbitrary concentration(20 °C; procedure)  
 NPU20577  
 P—Erythrocyte Hg<sup>a</sup> antibody; arb.c.(20 °C; proc.) = ?

**Plasma—**  
**Erythrocyte Hg<sup>a</sup> antibody;**  
 arbitrary concentration(37 °C; procedure)  
 NPU20578  
 P—Erythrocyte Hg<sup>a</sup> antibody; arb.c.(37 °C; proc.) = ?

**Plasma—**  
**Erythrocyte Hg<sup>a</sup> antibody;**  
 arbitrary substance concentration(20 °C; procedure)  
 arbitrary unit/litre  
 NPU21029  
 P—Erythrocyte Hg<sup>a</sup> antibody; arb.subst.c.(20 °C; proc.) = ?  
 arb.unit/l

**Plasma—**  
**Erythrocyte Hg<sup>a</sup> antibody;**  
 arbitrary substance concentration(37 °C; procedure)  
 arbitrary unit/litre  
 NPU21030  
 P—Erythrocyte Hg<sup>a</sup> antibody; arb.subst.c.(37 °C; proc.) = ?  
 arb.unit/l

**Erythrocytes(Blood)—**  
**Erythrocyte Hg<sup>a</sup> antigen;**  
 arbitrary number(procedure)  
 NPU20274  
 ErCs(B)—Erythrocyte Hg<sup>a</sup> antigen; arb.num.(proc.) = ?

**Plasma—**  
**Erythrocyte Hil antibody;**  
 arbitrary concentration(20 °C; procedure)  
 NPU20579  
 P—Erythrocyte Hil antibody; arb.c.(20 °C; proc.) = ?

**Plasma—**  
**Erythrocyte Hil antibody;**  
 arbitrary concentration(37 °C; procedure)  
 NPU20580  
 P—Erythrocyte Hil antibody; arb.c.(37 °C; proc.) = ?

**Plasma—**  
**Erythrocyte Hil antibody;**  
 arbitrary substance concentration(20 °C; procedure)  
 arbitrary unit/litre  
 NPU21031  
 P—Erythrocyte Hil antibody; arb.subst.c.(20 °C; proc.) = ?  
 arb.unit/l

**Plasma—**  
**Erythrocyte Hil antibody;**  
 arbitrary substance concentration(37 °C; procedure)  
 arbitrary unit/litre  
 NPU21032  
 P—Erythrocyte Hil antibody; arb.subst.c.(37 °C; proc.) = ?  
 arb.unit/l

**Erythrocytes(Blood)—**  
**Erythrocyte Hil antigen;**  
 arbitrary number(procedure)  
 NPU20275  
 ErCs(B)—Erythrocyte Hil antigen; arb.num.(proc.) = ?

**Plasma—**  
**Erythrocyte Hop antibody;**  
 arbitrary concentration(20 °C; procedure)  
 NPU20581  
 P—Erythrocyte Hop antibody; arb.c.(20 °C; proc.) = ?

**Plasma—**  
**Erythrocyte Hop antibody;**  
 arbitrary concentration(37 °C; procedure)  
 NPU20582  
 P—Erythrocyte Hop antibody; arb.c.(37 °C; proc.) = ?

**Plasma—**  
**Erythrocyte Hop antibody;**  
 arbitrary substance concentration(20 °C; procedure)  
 arbitrary unit/litre  
 NPU21033  
 P—Erythrocyte Hop antibody; arb.subst.c.(20 °C; proc.) = ?  
 arb.unit/l

**Plasma—**  
**Erythrocyte Hop antibody;**  
**arbitrary substance concentration(37 °C; procedure)**  
**arbitrary unit/litre**  
**NPU21034**  
P—Erythrocyte Hop antibody; arb.subst.c.(37 °C; proc.) = ?  
arb.unit/l

**Erythrocytes(Blood)—**  
**Erythrocyte Hop antigen;**  
**arbitrary number(procedure)**  
**NPU20276**  
ErCs(B)—Erythrocyte Hop antigen; arb.num.(proc.) = ?

**Plasma—**  
**Erythrocyte Hr antibody;**  
**arbitrary concentration(20 °C; procedure)**  
**NPU20583**  
P—Erythrocyte Hr antibody; arb.c.(20 °C; proc.) = ?

**Plasma—**  
**Erythrocyte Hr antibody;**  
**arbitrary concentration(37 °C; procedure)**  
**NPU20584**  
P—Erythrocyte Hr antibody; arb.c.(37 °C; proc.) = ?

**Plasma—**  
**Erythrocyte Hr antibody;**  
**arbitrary substance concentration(20 °C; procedure)**  
**arbitrary unit/litre**  
**NPU21035**  
P—Erythrocyte Hr antibody; arb.subst.c.(20 °C; proc.) = ?  
arb.unit/l

**Plasma—**  
**Erythrocyte Hr antibody;**  
**arbitrary substance concentration(37 °C; procedure)**  
**arbitrary unit/litre**  
**NPU21036**  
P—Erythrocyte Hr antibody; arb.subst.c.(37 °C; proc.) = ?  
arb.unit/l

**Erythrocytes(Blood)—**  
**Erythrocyte Hr antigen;**  
**arbitrary number(procedure)**  
**NPU20277**  
ErCs(B)—Erythrocyte Hr antigen; arb.num.(proc.) = ?

**Plasma—**  
**Erythrocyte Hr<sub>o</sub> antibody;**  
**arbitrary concentration(20 °C; procedure)**  
**NPU20591**  
P—Erythrocyte Hr<sub>o</sub> antibody; arb.c.(20 °C; proc.) = ?

**Plasma—**  
**Erythrocyte Hr<sub>o</sub> antibody;**  
**arbitrary concentration(37 °C; procedure)**  
**NPU20592**  
P—Erythrocyte Hr<sub>o</sub> antibody; arb.c.(37 °C; proc.) = ?

**Plasma—**  
**Erythrocyte Hr<sub>o</sub> antibody;**  
**arbitrary substance concentration(20 °C; procedure)**  
**arbitrary unit/litre**  
**NPU21043**  
P—Erythrocyte Hr<sub>o</sub> antibody; arb.subst.c.(20 °C; proc.) = ?  
arb.unit/l

**Plasma—**  
**Erythrocyte Hr<sub>o</sub> antibody;**  
**arbitrary substance concentration(37 °C; procedure)**  
**arbitrary unit/litre**  
**NPU21044**  
P—Erythrocyte Hr<sub>o</sub> antibody; arb.subst.c.(37 °C; proc.) = ?  
arb.unit/l

**Erythrocytes(Blood)—**  
**Erythrocyte Hr<sub>o</sub> antigen;**  
**arbitrary number(procedure)**  
**NPU20281**  
ErCs(B)—Erythrocyte Hr<sub>o</sub> antigen; arb.num.(proc.) = ?

**Plasma—**  
**Erythrocyte hr<sup>b</sup>antibody;**  
**arbitrary concentration(20 °C; procedure)**  
**NPU20585**  
P—Erythrocyte hr<sup>b</sup>antibody; arb.c.(20 °C; proc.) = ?

**Plasma—**  
**Erythrocyte Hr<sup>b</sup>antibody;**  
**arbitrary concentration(20 °C; procedure)**  
**NPU20586**  
P—Erythrocyte Hr<sup>b</sup>antibody; arb.c.(20 °C; proc.) = ?

**Plasma—**  
**Erythrocyte hr<sup>b</sup>antibody;**  
**arbitrary concentration(37 °C; procedure)**  
**NPU20587**  
P—Erythrocyte hr<sup>b</sup>antibody; arb.c.(37 °C; proc.) = ?

**Plasma—**  
**Erythrocyte Hr<sup>b</sup>antibody;**  
**arbitrary concentration(37 °C; procedure)**  
**NPU20588**  
P—Erythrocyte Hr<sup>b</sup>antibody; arb.c.(37 °C; proc.) = ?

**Plasma—**  
**Erythrocyte hr<sup>b</sup>antibody;**  
**arbitrary substance concentration(20 °C; procedure)**  
**arbitrary unit/litre**  
**NPU21037**  
P—Erythrocyte hr<sup>b</sup>antibody; arb.subst.c.(20 °C; proc.) = ?  
arb.unit/l

**Plasma—**  
**Erythrocyte Hr<sup>b</sup>antibody;**  
**arbitrary substance concentration(20 °C; procedure)**  
**arbitrary unit/litre**  
**NPU21038**  
P—Erythrocyte Hr<sup>b</sup>antibody; arb.subst.c.(20 °C; proc.) = ?  
arb.unit/l

**Plasma—**  
**Erythrocyte hr<sup>b</sup>antibody;**  
**arbitrary substance concentration(37 °C; procedure)**  
**arbitrary unit/litre**  
**NPU21039**  
P—Erythrocyte hr<sup>b</sup>antibody; arb.subst.c.(37 °C; proc.) = ?  
arb.unit/l

**Plasma—**  
**Erythrocyte Hr<sup>b</sup>antibody;**  
**arbitrary substance concentration(37 °C; procedure)**  
**arbitrary unit/litre**  
**NPU21040**  
P—Erythrocyte Hr<sup>b</sup>antibody; arb.subst.c.(37 °C; proc.) = ?  
arb.unit/l

**Erythrocytes(Blood)—**  
**Erythrocyte hr<sup>b</sup>antigen;**  
**arbitrary number(procedure)**  
**NPU20278**  
ErCs(B)—Erythrocyte hr<sup>b</sup>antigen; arb.num.(proc.) = ?

**Erythrocytes(Blood)—**  
**Erythrocyte Hr<sup>b</sup>antigen;**  
**arbitrary number(procedure)**  
**NPU20279**  
ErCs(B)—Erythrocyte Hr<sup>b</sup>antigen; arb.num.(proc.) = ?

**Plasma—**  
**Erythrocyte hr<sup>H</sup> antibody;**  
**arbitrary concentration(20 °C; procedure)**  
**NPU20589**  
P—Erythrocyte hr<sup>H</sup> antibody; arb.c.(20 °C; proc.) = ?

**Plasma—**  
**Erythrocyte hr<sup>H</sup> antibody;**  
**arbitrary concentration(37 °C; procedure)**  
**NPU20590**  
P—Erythrocyte hr<sup>H</sup> antibody; arb.c.(37 °C; proc.) = ?

**Plasma—**  
**Erythrocyte hr<sup>H</sup> antibody;**  
**arbitrary substance concentration(20 °C; procedure)**  
**arbitrary unit/litre**  
**NPU21041**  
P—Erythrocyte hr<sup>H</sup> antibody; arb.subst.c.(20 °C; proc.) = ?  
arb.unit/l

**Plasma—**  
**Erythrocyte hr<sup>H</sup> antibody;**  
**arbitrary substance concentration(37 °C; procedure)**  
**arbitrary unit/litre**  
**NPU21042**  
P—Erythrocyte hr<sup>H</sup> antibody; arb.subst.c.(37 °C; proc.) = ?  
arb.unit/l

**Erythrocytes(Blood)—**  
**Erythrocyte hr<sup>H</sup> antigen;**  
**arbitrary number(procedure)**  
**NPU20280**  
ErCs(B)—Erythrocyte hr<sup>H</sup> antigen; arb.num.(proc.) = ?

**Plasma—**  
**Erythrocyte hr<sup>S</sup> antibody;**  
**arbitrary concentration(20 °C; procedure)**  
**NPU20593**  
P—Erythrocyte hr<sup>S</sup> antibody; arb.c.(20 °C; proc.) = ?

**Plasma—**  
**Erythrocyte hr<sup>S</sup> antibody;**  
**arbitrary concentration(37 °C; procedure)**  
**NPU20594**  
P—Erythrocyte hr<sup>S</sup> antibody; arb.c.(37 °C; proc.) = ?

**Plasma—**  
**Erythrocyte hr<sup>S</sup> antibody;**  
**arbitrary substance concentration(20 °C; procedure)**  
**arbitrary unit/litre**  
**NPU21045**  
P—Erythrocyte hr<sup>S</sup> antibody; arb.subst.c.(20 °C; proc.) = ?  
arb.unit/l

**Plasma—**  
**Erythrocyte hr<sup>S</sup> antibody;**  
**arbitrary substance concentration(37 °C; procedure)**  
**arbitrary unit/litre**  
**NPU21046**  
P—Erythrocyte hr<sup>S</sup> antibody; arb.subst.c.(37 °C; proc.) = ?  
arb.unit/l

**Erythrocytes(Blood)—**  
**Erythrocyte hr<sup>S</sup> antigen;**  
**arbitrary number(procedure)**  
**NPU20282**  
ErCs(B)—Erythrocyte hr<sup>S</sup> antigen; arb.num.(proc.) = ?

**Plasma—**  
**Erythrocyte Hut antibody;**  
**arbitrary concentration(20 °C; procedure)**  
**NPU20595**  
P—Erythrocyte Hut antibody; arb.c.(20 °C; proc.) = ?

**Plasma—**  
**Erythrocyte Hut antibody;**  
**arbitrary concentration(37 °C; procedure)**  
**NPU20596**  
P—Erythrocyte Hut antibody; arb.c.(37 °C; proc.) = ?

**Plasma—**  
**Erythrocyte Hut antibody;**  
**arbitrary substance concentration(20 °C; procedure)**  
**arbitrary unit/litre**  
**NPU21047**  
P—Erythrocyte Hut antibody; arb.subst.c.(20 °C; proc.) = ?  
arb.unit/l

**Plasma—**  
**Erythrocyte Hut antibody;**  
**arbitrary substance concentration(37 °C; procedure)**  
**arbitrary unit/litre**  
**NPU21048**  
P—Erythrocyte Hut antibody; arb.subst.c.(37 °C; proc.) = ?  
arb.unit/l

**Erythrocytes(Blood)—**  
**Erythrocyte Hut antigen;**  
**arbitrary number(procedure)**  
**NPU20283**  
ErCs(B)—Erythrocyte Hut antigen; arb.num.(proc.) = ?

**Plasma—**  
**Erythrocyte Hy antibody;**  
**arbitrary concentration(20 °C; procedure)**  
**NPU20597**  
P—Erythrocyte Hy antibody; arb.c.(20 °C; proc.) = ?

**Plasma—**  
**Erythrocyte Hy antibody;**  
**arbitrary concentration(37 °C; procedure)**  
**NPU20598**  
P—Erythrocyte Hy antibody; arb.c.(37 °C; proc.) = ?

**Plasma—**  
**Erythrocyte Hy antibody;**  
**arbitrary substance concentration(20 °C; procedure)**  
**arbitrary unit/litre**  
**NPU21049**  
P—Erythrocyte Hy antibody; arb.subst.c.(20 °C; proc.) = ?  
arb.unit/l

**Plasma—**  
**Erythrocyte Hy antibody;**  
**arbitrary substance concentration(37 °C; procedure)**  
**arbitrary unit/litre**  
**NPU21050**  
P—Erythrocyte Hy antibody; arb.subst.c.(37 °C; proc.) = ?  
arb.unit/l

**Erythrocytes(Blood)—**  
**Erythrocyte Hy antigen;**  
**arbitrary number(procedure)**  
**NPU20284**  
ErCs(B)—Erythrocyte Hy antigen; arb.num.(proc.) = ?

**Plasma—**  
**Erythrocyte IFC antibody;**  
**arbitrary concentration(20 °C; procedure)**  
**NPU20599**  
P—Erythrocyte IFC antibody; arb.c.(20 °C; proc.) = ?

**Plasma—**  
**Erythrocyte IFC antibody;**  
**arbitrary concentration(37 °C; procedure)**  
**NPU20600**  
P—Erythrocyte IFC antibody; arb.c.(37 °C; proc.) = ?

**Plasma—**  
**Erythrocyte IFC antibody;**  
arbitrary substance concentration(20 °C; procedure)  
arbitrary unit/litre  
**NPU21051**  
P—Erythrocyte IFC antibody; arb.subst.c.(20 °C; proc.) = ?  
arb.unit/l

**Plasma—**  
**Erythrocyte IFC antibody;**  
arbitrary substance concentration(37 °C; procedure)  
arbitrary unit/litre  
**NPU21052**  
P—Erythrocyte IFC antibody; arb.subst.c.(37 °C; proc.) = ?  
arb.unit/l

**Erythrocytes(Blood)—**  
**Erythrocyte IFC antigen;**  
arbitrary number(procedure)  
**NPU20285**  
ErCs(B)—Erythrocyte IFC antigen; arb.num.(proc.) = ?

**Plasma—**  
**Erythrocyte In<sup>a</sup> antibody;**  
arbitrary concentration(20 °C; procedure)  
**NPU20601**  
P—Erythrocyte In<sup>a</sup> antibody; arb.c.(20 °C; proc.) = ?

**Plasma—**  
**Erythrocyte In<sup>a</sup> antibody;**  
arbitrary concentration(37 °C; procedure)  
**NPU20602**  
P—Erythrocyte In<sup>a</sup> antibody; arb.c.(37 °C; proc.) = ?

**Plasma—**  
**Erythrocyte In<sup>a</sup> antibody;**  
arbitrary substance concentration(20 °C; procedure)  
arbitrary unit/litre  
**NPU21053**  
P—Erythrocyte In<sup>a</sup> antibody; arb.subst.c.(20 °C; proc.) = ?  
arb.unit/l

**Plasma—**  
**Erythrocyte In<sup>a</sup> antibody;**  
arbitrary substance concentration(37 °C; procedure)  
arbitrary unit/litre  
**NPU21054**  
P—Erythrocyte In<sup>a</sup> antibody; arb.subst.c.(37 °C; proc.) = ?  
arb.unit/l

**Erythrocytes(Blood)—**  
**Erythrocyte In<sup>a</sup> antigen;**  
arbitrary number(procedure)  
**NPU20286**  
ErCs(B)—Erythrocyte In<sup>a</sup> antigen; arb.num.(proc.) = ?

**Plasma—**  
**Erythrocyte In<sup>b</sup> antibody;**  
arbitrary concentration(20 °C; procedure)  
**NPU20603**  
P—Erythrocyte In<sup>b</sup> antibody; arb.c.(20 °C; proc.) = ?

**Plasma—**  
**Erythrocyte In<sup>b</sup> antibody;**  
arbitrary concentration(37 °C; procedure)  
**NPU20604**  
P—Erythrocyte In<sup>b</sup> antibody; arb.c.(37 °C; proc.) = ?

**Plasma—**  
**Erythrocyte In<sup>b</sup> antibody;**  
arbitrary substance concentration(20 °C; procedure)  
arbitrary unit/litre  
**NPU21055**  
P—Erythrocyte In<sup>b</sup> antibody; arb.subst.c.(20 °C; proc.) = ?  
arb.unit/l

**Plasma—**  
**Erythrocyte In<sup>b</sup> antibody;**  
arbitrary substance concentration(37 °C; procedure)  
arbitrary unit/litre  
**NPU21056**  
P—Erythrocyte In<sup>b</sup> antibody; arb.subst.c.(37 °C; proc.) = ?  
arb.unit/l

**Erythrocytes(Blood)—**  
**Erythrocyte In<sup>b</sup> antigen;**  
arbitrary number(procedure)  
**NPU20287**  
ErCs(B)—Erythrocyte In<sup>b</sup> antigen; arb.num.(proc.) = ?

**Plasma—**  
**Erythrocyte JAL antibody;**  
arbitrary concentration(20 °C; procedure)  
**NPU20605**  
P—Erythrocyte JAL antibody; arb.c.(20 °C; proc.) = ?

**Plasma—**  
**Erythrocyte JAL antibody;**  
arbitrary concentration(37 °C; procedure)  
**NPU20606**  
P—Erythrocyte JAL antibody; arb.c.(37 °C; proc.) = ?

**Plasma—**  
**Erythrocyte JAL antibody;**  
arbitrary substance concentration(20 °C; procedure)  
arbitrary unit/litre  
**NPU21057**  
P—Erythrocyte JAL antibody; arb.subst.c.(20 °C; proc.) = ?  
arb.unit/l

**Plasma—**  
**Erythrocyte JAL antibody;**  
arbitrary substance concentration(37 °C; procedure)  
arbitrary unit/litre  
**NPU21058**  
P—Erythrocyte JAL antibody; arb.subst.c.(37 °C; proc.) = ?  
arb.unit/l

**Erythrocytes(Blood)—**  
**Erythrocyte JAL antigen;**  
arbitrary number(procedure)  
**NPU20288**  
ErCs(B)—Erythrocyte JAL antigen; arb.num.(proc.) = ?

**Plasma—**  
**Erythrocyte Jk<sup>a</sup> antibody;**  
arbitrary concentration(20 °C; procedure)  
**NPU20609**  
P—Erythrocyte Jk<sup>a</sup> antibody; arb.c.(20 °C; proc.) = ?

**Plasma—**  
**Erythrocyte Jk<sup>a</sup> antibody;**  
arbitrary concentration(37 °C; procedure)  
**NPU20610**  
P—Erythrocyte Jk<sup>a</sup> antibody; arb.c.(37 °C; proc.) = ?

**Plasma—**  
**Erythrocyte Jk<sup>a</sup> antibody;**  
arbitrary substance concentration(20 °C; procedure)  
arbitrary unit/litre  
**NPU21061**  
P—Erythrocyte Jk<sup>a</sup> antibody; arb.subst.c.(20 °C; proc.) = ?  
arb.unit/l

**Plasma—**  
**Erythrocyte Jk<sup>a</sup> antibody;**  
arbitrary substance concentration(37 °C; procedure)  
arbitrary unit/litre  
**NPU21062**  
P—Erythrocyte Jk<sup>a</sup> antibody; arb.subst.c.(37 °C; proc.) = ?  
arb.unit/l

**Erythrocytes(Blood)—**  
**Erythrocyte Jk<sup>a</sup> antigen;**  
**arbitrary number(procedure)**  
**NPU20290**  
ErCs(B)—Erythrocyte Jk<sup>a</sup> antigen; arb.num.(proc.) = ?

**Plasma—**  
**Erythrocyte Jk<sup>b</sup> antibody;**  
**arbitrary concentration(20 °C; procedure)**  
**NPU20611**  
P—Erythrocyte Jk<sup>b</sup> antibody; arb.c.(20 °C; proc.) = ?

**Plasma—**  
**Erythrocyte Jk<sup>b</sup> antibody;**  
**arbitrary concentration(37 °C; procedure)**  
**NPU20612**  
P—Erythrocyte Jk<sup>b</sup> antibody; arb.c.(37 °C; proc.) = ?

**Plasma—**  
**Erythrocyte Jk<sup>b</sup> antibody;**  
**arbitrary substance concentration(20 °C; procedure)**  
**arbitrary unit/litre**  
**NPU21063**  
P—Erythrocyte Jk<sup>b</sup> antibody; arb.subst.c.(20 °C; proc.) = ?  
arb.unit/l

**Plasma—**  
**Erythrocyte Jk<sup>b</sup> antibody;**  
**arbitrary substance concentration(37 °C; procedure)**  
**arbitrary unit/litre**  
**NPU21064**  
P—Erythrocyte Jk<sup>b</sup> antibody; arb.subst.c.(37 °C; proc.) = ?  
arb.unit/l

**Erythrocytes(Blood)—**  
**Erythrocyte Jk<sup>b</sup> antigen;**  
**arbitrary number(procedure)**  
**NPU20291**  
ErCs(B)—Erythrocyte Jk<sup>b</sup> antigen; arb.num.(proc.) = ?

**Plasma—**  
**Erythrocyte Jk3 antibody;**  
**arbitrary concentration(20 °C; procedure)**  
**NPU20607**  
P—Erythrocyte Jk3 antibody; arb.c.(20 °C; proc.) = ?

**Plasma—**  
**Erythrocyte Jk3 antibody;**  
**arbitrary concentration(37 °C; procedure)**  
**NPU20608**  
P—Erythrocyte Jk3 antibody; arb.c.(37 °C; proc.) = ?

**Plasma—**  
**Erythrocyte Jk3 antibody;**  
**arbitrary substance concentration(20 °C; procedure)**  
**arbitrary unit/litre**  
**NPU21059**  
P—Erythrocyte Jk3 antibody; arb.subst.c.(20 °C; proc.) = ?  
arb.unit/l

**Plasma—**  
**Erythrocyte Jk3 antibody;**  
**arbitrary substance concentration(37 °C; procedure)**  
**arbitrary unit/litre**  
**NPU21060**  
P—Erythrocyte Jk3 antibody; arb.subst.c.(37 °C; proc.) = ?  
arb.unit/l

**Erythrocytes(Blood)—**  
**Erythrocyte Jk3 antigen;**  
**arbitrary number(procedure)**  
**NPU20289**  
ErCs(B)—Erythrocyte Jk3 antigen; arb.num.(proc.) = ?

**Plasma—**  
**Erythrocyte Jn<sup>a</sup> antibody;**  
**arbitrary concentration(20 °C; procedure)**  
**NPU20613**  
P—Erythrocyte Jn<sup>a</sup> antibody; arb.c.(20 °C; proc.) = ?

**Plasma—**  
**Erythrocyte Jn<sup>a</sup> antibody;**  
**arbitrary concentration(37 °C; procedure)**  
**NPU20614**  
P—Erythrocyte Jn<sup>a</sup> antibody; arb.c.(37 °C; proc.) = ?

**Plasma—**  
**Erythrocyte Jn<sup>a</sup> antibody;**  
**arbitrary substance concentration(20 °C; procedure)**  
**arbitrary unit/litre**  
**NPU21065**  
P—Erythrocyte Jn<sup>a</sup> antibody; arb.subst.c.(20 °C; proc.) = ?  
arb.unit/l

**Plasma—**  
**Erythrocyte Jn<sup>a</sup> antibody;**  
**arbitrary substance concentration(37 °C; procedure)**  
**arbitrary unit/litre**  
**NPU21066**  
P—Erythrocyte Jn<sup>a</sup> antibody; arb.subst.c.(37 °C; proc.) = ?  
arb.unit/l

**Erythrocytes(Blood)—**  
**Erythrocyte Jn<sup>a</sup> antigen;**  
**arbitrary number(procedure)**  
**NPU20292**  
ErCs(B)—Erythrocyte Jn<sup>a</sup> antigen; arb.num.(proc.) = ?

**Plasma—**  
**Erythrocyte Jo<sup>a</sup> antibody;**  
**arbitrary concentration(20 °C; procedure)**  
**NPU20615**  
P—Erythrocyte Jo<sup>a</sup> antibody; arb.c.(20 °C; proc.) = ?

**Plasma—**  
**Erythrocyte Jo<sup>a</sup> antibody;**  
**arbitrary concentration(37 °C; procedure)**  
**NPU20616**  
P—Erythrocyte Jo<sup>a</sup> antibody; arb.c.(37 °C; proc.) = ?

**Plasma—**  
**Erythrocyte Jo<sup>a</sup> antibody;**  
**arbitrary substance concentration(20 °C; procedure)**  
**arbitrary unit/litre**  
**NPU21067**  
P—Erythrocyte Jo<sup>a</sup> antibody; arb.subst.c.(20 °C; proc.) = ?  
arb.unit/l

**Plasma—**  
**Erythrocyte Jo<sup>a</sup> antibody;**  
**arbitrary substance concentration(37 °C; procedure)**  
**arbitrary unit/litre**  
**NPU21068**  
P—Erythrocyte Jo<sup>a</sup> antibody; arb.subst.c.(37 °C; proc.) = ?  
arb.unit/l

**Erythrocytes(Blood)—**  
**Erythrocyte Jo<sup>a</sup> antigen;**  
**arbitrary number(procedure)**  
**NPU20293**  
ErCs(B)—Erythrocyte Jo<sup>a</sup> antigen; arb.num.(proc.) = ?

**Plasma—**  
**Erythrocyte Js<sup>a</sup> antibody;**  
**arbitrary concentration(20 °C; procedure)**  
**NPU20617**  
P—Erythrocyte Js<sup>a</sup> antibody; arb.c.(20 °C; proc.) = ?

**Plasma—**  
**Erythrocyte Js<sup>a</sup> antibody;**  
 arbitrary concentration(37 °C; procedure)  
 NPU20618  
 P—Erythrocyte Js<sup>a</sup> antibody; arb.c.(37 °C; proc.) = ?

**Plasma—**  
**Erythrocyte Js<sup>a</sup> antibody;**  
 arbitrary substance concentration(20 °C; procedure)  
 arbitrary unit/litre  
 NPU21069  
 P—Erythrocyte Js<sup>a</sup> antibody; arb.subst.c.(20 °C; proc.) = ?  
 arb.unit/l

**Plasma—**  
**Erythrocyte Js<sup>a</sup> antibody;**  
 arbitrary substance concentration(37 °C; procedure)  
 arbitrary unit/litre  
 NPU21070  
 P—Erythrocyte Js<sup>a</sup> antibody; arb.subst.c.(37 °C; proc.) = ?  
 arb.unit/l

**Erythrocytes(Blood)—**  
**Erythrocyte Js<sup>a</sup> antigen;**  
 arbitrary number(procedure)  
 NPU20294  
 ErCs(B)—Erythrocyte Js<sup>a</sup> antigen; arb.num.(proc.) = ?

**Plasma—**  
**Erythrocyte Js<sup>b</sup> antibody;**  
 arbitrary concentration(20 °C; procedure)  
 NPU20619  
 P—Erythrocyte Js<sup>b</sup> antibody; arb.c.(20 °C; proc.) = ?

**Plasma—**  
**Erythrocyte Js<sup>b</sup> antibody;**  
 arbitrary concentration(37 °C; procedure)  
 NPU20620  
 P—Erythrocyte Js<sup>b</sup> antibody; arb.c.(37 °C; proc.) = ?

**Plasma—**  
**Erythrocyte Js<sup>b</sup> antibody;**  
 arbitrary substance concentration(20 °C; procedure)  
 arbitrary unit/litre  
 NPU21071  
 P—Erythrocyte Js<sup>b</sup> antibody; arb.subst.c.(20 °C; proc.) = ?  
 arb.unit/l

**Plasma—**  
**Erythrocyte Js<sup>b</sup> antibody;**  
 arbitrary substance concentration(37 °C; procedure)  
 arbitrary unit/litre  
 NPU21072  
 P—Erythrocyte Js<sup>b</sup> antibody; arb.subst.c.(37 °C; proc.) = ?  
 arb.unit/l

**Erythrocytes(Blood)—**  
**Erythrocyte Js<sup>b</sup> antigen;**  
 arbitrary number(procedure)  
 NPU20295  
 ErCs(B)—Erythrocyte Js<sup>b</sup> antigen; arb.num.(proc.) = ?

**Plasma—**  
**Erythrocyte K antibody;**  
 arbitrary concentration(20 °C; procedure)  
 NPU20643  
 P—Erythrocyte K antibody; arb.c.(20 °C; proc.) = ?

**Plasma—**  
**Erythrocyte k antibody;**  
 arbitrary concentration(20 °C; procedure)  
 NPU20644  
 P—Erythrocyte k antibody; arb.c.(20 °C; proc.) = ?

**Plasma—**  
**Erythrocyte K antibody;**  
 arbitrary concentration(37 °C; procedure)  
 NPU20645  
 P—Erythrocyte K antibody; arb.c.(37 °C; proc.) = ?

**Plasma—**  
**Erythrocyte k antibody;**  
 arbitrary concentration(37 °C; procedure)  
 NPU20646  
 P—Erythrocyte k antibody; arb.c.(37 °C; proc.) = ?

**Plasma—**  
**Erythrocyte K antibody;**  
 arbitrary substance concentration(20 °C; procedure)  
 arbitrary unit/litre  
 NPU210<sup>9</sup>/5  
 P—Erythrocyte K antibody; arb.subst.c.(20 °C; proc.) = ?  
 arb.unit/l

**Plasma—**  
**Erythrocyte k antibody;**  
 arbitrary substance concentration(20 °C; procedure)  
 arbitrary unit/litre  
 NPU210<sup>9</sup>/6  
 P—Erythrocyte k antibody; arb.subst.c.(20 °C; proc.) = ?  
 arb.unit/l

**Plasma—**  
**Erythrocyte K antibody;**  
 arbitrary substance concentration(37 °C; procedure)  
 arbitrary unit/litre  
 NPU210<sup>9</sup>/7  
 P—Erythrocyte K antibody; arb.subst.c.(37 °C; proc.) = ?  
 arb.unit/l

**Plasma—**  
**Erythrocyte k antibody;**  
 arbitrary substance concentration(37 °C; procedure)  
 arbitrary unit/litre  
 NPU210<sup>9</sup>/8  
 P—Erythrocyte k antibody; arb.subst.c.(37 °C; proc.) = ?  
 arb.unit/l

**Erythrocytes(Blood)—**  
**Erythrocyte K antigen;**  
 arbitrary number(procedure)  
 NPU20307  
 ErCs(B)—Erythrocyte K antigen; arb.num.(proc.) = ?

**Erythrocytes(Blood)—**  
**Erythrocyte k antigen;**  
 arbitrary number(procedure)  
 NPU20308  
 ErCs(B)—Erythrocyte k antigen; arb.num.(proc.) = ?

**Plasma—**  
**Erythrocyte K11 antibody;**  
 arbitrary concentration(20 °C; procedure)  
 NPU20621  
 P—Erythrocyte K11 antibody; arb.c.(20 °C; proc.) = ?

**Plasma—**  
**Erythrocyte K11 antibody;**  
 arbitrary concentration(37 °C; procedure)  
 NPU20622  
 P—Erythrocyte K11 antibody; arb.c.(37 °C; proc.) = ?

**Plasma—**  
**Erythrocyte K11 antibody;**  
 arbitrary substance concentration(20 °C; procedure)  
 arbitrary unit/litre  
 NPU21073  
 P—Erythrocyte K11 antibody; arb.subst.c.(20 °C; proc.) = ?  
 arb.unit/l

**Plasma—**  
**Erythrocyte K11 antibody;**  
**arbitrary substance concentration(37 °C; procedure)**  
**arbitrary unit/litre**  
**NPU21074**  
P—Erythrocyte K11 antibody; arb.subst.c.(37 °C; proc.) = ?  
arb.unit/l

**Erythrocytes(Blood)—**  
**Erythrocyte K11 antigen;**  
**arbitrary number(procedure)**  
**NPU20296**  
ErCs(B)—Erythrocyte K11 antigen; arb.num.(proc.) = ?

**Plasma—**  
**Erythrocyte K12 antibody;**  
**arbitrary concentration(20 °C; procedure)**  
**NPU20623**  
P—Erythrocyte K12 antibody; arb.c.(20 °C; proc.) = ?

**Plasma—**  
**Erythrocyte K12 antibody;**  
**arbitrary concentration(37 °C; procedure)**  
**NPU20624**  
P—Erythrocyte K12 antibody; arb.c.(37 °C; proc.) = ?

**Plasma—**  
**Erythrocyte K12 antibody;**  
**arbitrary substance concentration(20 °C; procedure)**  
**arbitrary unit/litre**  
**NPU21075**  
P—Erythrocyte K12 antibody; arb.subst.c.(20 °C; proc.) = ?  
arb.unit/l

**Plasma—**  
**Erythrocyte K12 antibody;**  
**arbitrary substance concentration(37 °C; procedure)**  
**arbitrary unit/litre**  
**NPU21076**  
P—Erythrocyte K12 antibody; arb.subst.c.(37 °C; proc.) = ?  
arb.unit/l

**Erythrocytes(Blood)—**  
**Erythrocyte K12 antigen;**  
**arbitrary number(procedure)**  
**NPU20297**  
ErCs(B)—Erythrocyte K12 antigen; arb.num.(proc.) = ?

**Plasma—**  
**Erythrocyte K13 antibody;**  
**arbitrary concentration(20 °C; procedure)**  
**NPU20625**  
P—Erythrocyte K13 antibody; arb.c.(20 °C; proc.) = ?

**Plasma—**  
**Erythrocyte K13 antibody;**  
**arbitrary concentration(37 °C; procedure)**  
**NPU20626**  
P—Erythrocyte K13 antibody; arb.c.(37 °C; proc.) = ?

**Plasma—**  
**Erythrocyte K13 antibody;**  
**arbitrary substance concentration(20 °C; procedure)**  
**arbitrary unit/litre**  
**NPU21077**  
P—Erythrocyte K13 antibody; arb.subst.c.(20 °C; proc.) = ?  
arb.unit/l

**Plasma—**  
**Erythrocyte K13 antibody;**  
**arbitrary substance concentration(37 °C; procedure)**  
**arbitrary unit/litre**  
**NPU21078**  
P—Erythrocyte K13 antibody; arb.subst.c.(37 °C; proc.) = ?  
arb.unit/l

**Erythrocytes(Blood)—**  
**Erythrocyte K13 antigen;**  
**arbitrary number(procedure)**  
**NPU20298**  
ErCs(B)—Erythrocyte K13 antigen; arb.num.(proc.) = ?

**Plasma—**  
**Erythrocyte K14 antibody;**  
**arbitrary concentration(20 °C; procedure)**  
**NPU20627**  
P—Erythrocyte K14 antibody; arb.c.(20 °C; proc.) = ?

**Plasma—**  
**Erythrocyte K14 antibody;**  
**arbitrary concentration(37 °C; procedure)**  
**NPU20628**  
P—Erythrocyte K14 antibody; arb.c.(37 °C; proc.) = ?

**Plasma—**  
**Erythrocyte K14 antibody;**  
**arbitrary substance concentration(20 °C; procedure)**  
**arbitrary unit/litre**  
**NPU21079**  
P—Erythrocyte K14 antibody; arb.subst.c.(20 °C; proc.) = ?  
arb.unit/l

**Plasma—**  
**Erythrocyte K14 antibody;**  
**arbitrary substance concentration(37 °C; procedure)**  
**arbitrary unit/litre**  
**NPU21080**  
P—Erythrocyte K14 antibody; arb.subst.c.(37 °C; proc.) = ?  
arb.unit/l

**Erythrocytes(Blood)—**  
**Erythrocyte K14 antigen;**  
**arbitrary number(procedure)**  
**NPU20299**  
ErCs(B)—Erythrocyte K14 antigen; arb.num.(proc.) = ?

**Plasma—**  
**Erythrocyte K16 antibody;**  
**arbitrary concentration(20 °C; procedure)**  
**NPU20629**  
P—Erythrocyte K16 antibody; arb.c.(20 °C; proc.) = ?

**Plasma—**  
**Erythrocyte K16 antibody;**  
**arbitrary concentration(37 °C; procedure)**  
**NPU20630**  
P—Erythrocyte K16 antibody; arb.c.(37 °C; proc.) = ?

**Plasma—**  
**Erythrocyte K16 antibody;**  
**arbitrary substance concentration(20 °C; procedure)**  
**arbitrary unit/litre**  
**NPU21081**  
P—Erythrocyte K16 antibody; arb.subst.c.(20 °C; proc.) = ?  
arb.unit/l

**Plasma—**  
**Erythrocyte K16 antibody;**  
**arbitrary substance concentration(37 °C; procedure)**  
**arbitrary unit/litre**  
**NPU21082**  
P—Erythrocyte K16 antibody; arb.subst.c.(37 °C; proc.) = ?  
arb.unit/l

**Erythrocytes(Blood)—**  
**Erythrocyte K16 antigen;**  
**arbitrary number(procedure)**  
**NPU20300**  
ErCs(B)—Erythrocyte K16 antigen; arb.num.(proc.) = ?

**Plasma—**  
**Erythrocyte K17 antibody;**  
**arbitrary concentration(20 °C; procedure)**  
**NPU20631**  
P—Erythrocyte K17 antibody; arb.c.(20 °C; proc.) = ?

**Plasma—**  
**Erythrocyte K17 antibody;**  
**arbitrary concentration(37 °C; procedure)**  
**NPU20632**  
P—Erythrocyte K17 antibody; arb.c.(37 °C; proc.) = ?

**Plasma—**  
**Erythrocyte K17 antibody;**  
**arbitrary substance concentration(20 °C; procedure)**  
**arbitrary unit/litre**  
**NPU21083**  
P—Erythrocyte K17 antibody; arb.subst.c.(20 °C; proc.) = ?  
arb.unit/l

**Plasma—**  
**Erythrocyte K17 antibody;**  
**arbitrary substance concentration(37 °C; procedure)**  
**arbitrary unit/litre**  
**NPU21084**  
P—Erythrocyte K17 antibody; arb.subst.c.(37 °C; proc.) = ?  
arb.unit/l

**Erythrocytes(Blood)—**  
**Erythrocyte K17 antigen;**  
**arbitrary number(procedure)**  
**NPU20301**  
ErCs(B)—Erythrocyte K17 antigen; arb.num.(proc.) = ?

**Plasma—**  
**Erythrocyte K18 antibody;**  
**arbitrary concentration(20 °C; procedure)**  
**NPU20633**  
P—Erythrocyte K18 antibody; arb.c.(20 °C; proc.) = ?

**Plasma—**  
**Erythrocyte K18 antibody;**  
**arbitrary concentration(37 °C; procedure)**  
**NPU20634**  
P—Erythrocyte K18 antibody; arb.c.(37 °C; proc.) = ?

**Plasma—**  
**Erythrocyte K18 antibody;**  
**arbitrary substance concentration(20 °C; procedure)**  
**arbitrary unit/litre**  
**NPU21085**  
P—Erythrocyte K18 antibody; arb.subst.c.(20 °C; proc.) = ?  
arb.unit/l

**Plasma—**  
**Erythrocyte K18 antibody;**  
**arbitrary substance concentration(37 °C; procedure)**  
**arbitrary unit/litre**  
**NPU21086**  
P—Erythrocyte K18 antibody; arb.subst.c.(37 °C; proc.) = ?  
arb.unit/l

**Erythrocytes(Blood)—**  
**Erythrocyte K18 antigen;**  
**arbitrary number(procedure)**  
**NPU20302**  
ErCs(B)—Erythrocyte K18 antigen; arb.num.(proc.) = ?

**Plasma—**  
**Erythrocyte K19 antibody;**  
**arbitrary concentration(20 °C; procedure)**  
**NPU20635**  
P—Erythrocyte K19 antibody; arb.c.(20 °C; proc.) = ?

**Plasma—**  
**Erythrocyte K19 antibody;**  
**arbitrary concentration(37 °C; procedure)**  
**NPU20636**  
P—Erythrocyte K19 antibody; arb.c.(37 °C; proc.) = ?

**Plasma—**  
**Erythrocyte K19 antibody;**  
**arbitrary substance concentration(20 °C; procedure)**  
**arbitrary unit/litre**  
**NPU21087**  
P—Erythrocyte K19 antibody; arb.subst.c.(20 °C; proc.) = ?  
arb.unit/l

**Plasma—**  
**Erythrocyte K19 antibody;**  
**arbitrary substance concentration(37 °C; procedure)**  
**arbitrary unit/litre**  
**NPU21088**  
P—Erythrocyte K19 antibody; arb.subst.c.(37 °C; proc.) = ?  
arb.unit/l

**Erythrocytes(Blood)—**  
**Erythrocyte K19 antigen;**  
**arbitrary number(procedure)**  
**NPU20303**  
ErCs(B)—Erythrocyte K19 antigen; arb.num.(proc.) = ?

**Plasma—**  
**Erythrocyte K22 antibody;**  
**arbitrary concentration(20 °C; procedure)**  
**NPU20637**  
P—Erythrocyte K22 antibody; arb.c.(20 °C; proc.) = ?

**Plasma—**  
**Erythrocyte K22 antibody;**  
**arbitrary concentration(37 °C; procedure)**  
**NPU20638**  
P—Erythrocyte K22 antibody; arb.c.(37 °C; proc.) = ?

**Plasma—**  
**Erythrocyte K22 antibody;**  
**arbitrary substance concentration(20 °C; procedure)**  
**arbitrary unit/litre**  
**NPU21089**  
P—Erythrocyte K22 antibody; arb.subst.c.(20 °C; proc.) = ?  
arb.unit/l

**Plasma—**  
**Erythrocyte K22 antibody;**  
**arbitrary substance concentration(37 °C; procedure)**  
**arbitrary unit/litre**  
**NPU210<sup>9</sup>/0**  
P—Erythrocyte K22 antibody; arb.subst.c.(37 °C; proc.) = ?  
arb.unit/l

**Erythrocytes(Blood)—**  
**Erythrocyte K22 antigen;**  
**arbitrary number(procedure)**  
**NPU20304**  
ErCs(B)—Erythrocyte K22 antigen; arb.num.(proc.) = ?

**Plasma—**  
**Erythrocyte K23 antibody;**  
**arbitrary concentration(20 °C; procedure)**  
**NPU20639**  
P—Erythrocyte K23 antibody; arb.c.(20 °C; proc.) = ?

**Plasma—**  
**Erythrocyte K23 antibody;**  
**arbitrary concentration(37 °C; procedure)**  
**NPU20640**  
P—Erythrocyte K23 antibody; arb.c.(37 °C; proc.) = ?

**Plasma—**  
**Erythrocyte K23 antibody;**  
arbitrary substance concentration(20 °C; procedure)  
arbitrary unit/litre  
**NPU210<sup>9</sup>/1**  
P—Erythrocyte K23 antibody; arb.subst.c.(20 °C; proc.) = ?  
arb.unit/l

**Plasma—**  
**Erythrocyte K23 antibody;**  
arbitrary substance concentration(37 °C; procedure)  
arbitrary unit/litre  
**NPU210<sup>9</sup>/2**  
P—Erythrocyte K23 antibody; arb.subst.c.(37 °C; proc.) = ?  
arb.unit/l

**Erythrocytes(Blood)—**  
**Erythrocyte K23 antigen;**  
arbitrary number(procedure)  
**NPU20305**  
Ercs(B)—Erythrocyte K23 antigen; arb.num.(proc.) = ?

**Plasma—**  
**Erythrocyte K24 antibody;**  
arbitrary concentration(20 °C; procedure)  
**NPU20641**  
P—Erythrocyte K24 antibody; arb.c.(20 °C; proc.) = ?

**Plasma—**  
**Erythrocyte K24 antibody;**  
arbitrary concentration(37 °C; procedure)  
**NPU20642**  
P—Erythrocyte K24 antibody; arb.c.(37 °C; proc.) = ?

**Plasma—**  
**Erythrocyte K24 antibody;**  
arbitrary substance concentration(20 °C; procedure)  
arbitrary unit/litre  
**NPU210<sup>9</sup>/3**  
P—Erythrocyte K24 antibody; arb.subst.c.(20 °C; proc.) = ?  
arb.unit/l

**Plasma—**  
**Erythrocyte K24 antibody;**  
arbitrary substance concentration(37 °C; procedure)  
arbitrary unit/litre  
**NPU210<sup>9</sup>/4**  
P—Erythrocyte K24 antibody; arb.subst.c.(37 °C; proc.) = ?  
arb.unit/l

**Erythrocytes(Blood)—**  
**Erythrocyte K24 antigen;**  
arbitrary number(procedure)  
**NPU20306**  
Ercs(B)—Erythrocyte K24 antigen; arb.num.(proc.) = ?

**Plasma—**  
**Erythrocyte Km antibody;**  
arbitrary concentration(20 °C; procedure)  
**NPU20647**  
P—Erythrocyte Km antibody; arb.c.(20 °C; proc.) = ?

**Plasma—**  
**Erythrocyte Km antibody;**  
arbitrary concentration(37 °C; procedure)  
**NPU20648**  
P—Erythrocyte Km antibody; arb.c.(37 °C; proc.) = ?

**Plasma—**  
**Erythrocyte Km antibody;**  
arbitrary substance concentration(20 °C; procedure)  
arbitrary unit/litre  
**NPU210<sup>9</sup>/9**  
P—Erythrocyte Km antibody; arb.subst.c.(20 °C; proc.) = ?  
arb.unit/l

**Plasma—**  
**Erythrocyte Km antibody;**  
arbitrary substance concentration(37 °C; procedure)  
arbitrary unit/litre  
**NPU21100**  
P—Erythrocyte Km antibody; arb.subst.c.(37 °C; proc.) = ?  
arb.unit/l

**Erythrocytes(Blood)—**  
**Erythrocyte Km antigen;**  
arbitrary number(procedure)  
**NPU20309**  
Ercs(B)—Erythrocyte Km antigen; arb.num.(proc.) = ?

**Plasma—**  
**Erythrocyte Kn<sup>a</sup> antibody;**  
arbitrary concentration(20 °C; procedure)  
**NPU20649**  
P—Erythrocyte Kn<sup>a</sup> antibody; arb.c.(20 °C; proc.) = ?

**Plasma—**  
**Erythrocyte Kn<sup>a</sup> antibody;**  
arbitrary concentration(37 °C; procedure)  
**NPU20650**  
P—Erythrocyte Kn<sup>a</sup> antibody; arb.c.(37 °C; proc.) = ?

**Plasma—**  
**Erythrocyte Kn<sup>a</sup> antibody;**  
arbitrary substance concentration(20 °C; procedure)  
arbitrary unit/litre  
**NPU21101**  
P—Erythrocyte Kn<sup>a</sup> antibody; arb.subst.c.(20 °C; proc.) = ?  
arb.unit/l

**Plasma—**  
**Erythrocyte Kn<sup>a</sup> antibody;**  
arbitrary substance concentration(37 °C; procedure)  
arbitrary unit/litre  
**NPU21102**  
P—Erythrocyte Kn<sup>a</sup> antibody; arb.subst.c.(37 °C; proc.) = ?  
arb.unit/l

**Erythrocytes(Blood)—**  
**Erythrocyte Kn<sup>a</sup> antigen;**  
arbitrary number(procedure)  
**NPU20310**  
Ercs(B)—Erythrocyte Kn<sup>a</sup> antigen; arb.num.(proc.) = ?

**Plasma—**  
**Erythrocyte Kn<sup>b</sup> antibody;**  
arbitrary concentration(20 °C; procedure)  
**NPU20651**  
P—Erythrocyte Kn<sup>b</sup> antibody; arb.c.(20 °C; proc.) = ?

**Plasma—**  
**Erythrocyte Kn<sup>b</sup> antibody;**  
arbitrary concentration(37 °C; procedure)  
**NPU20652**  
P—Erythrocyte Kn<sup>b</sup> antibody; arb.c.(37 °C; proc.) = ?

**Plasma—**  
**Erythrocyte Kn<sup>b</sup> antibody;**  
arbitrary substance concentration(20 °C; procedure)  
arbitrary unit/litre  
**NPU21103**  
P—Erythrocyte Kn<sup>b</sup> antibody; arb.subst.c.(20 °C; proc.) = ?  
arb.unit/l

**Plasma—**  
**Erythrocyte Kn<sup>b</sup> antibody;**  
arbitrary substance concentration(37 °C; procedure)  
arbitrary unit/litre  
**NPU21104**  
P—Erythrocyte Kn<sup>b</sup> antibody; arb.subst.c.(37 °C; proc.) = ?  
arb.unit/l

**Erythrocytes(Blood)—**  
**Erythrocyte Kn<sup>b</sup>antigen;**  
**arbitrary number(procedure)**  
**NPU20311**  
ErCs(B)—Erythrocyte Kn<sup>b</sup>antigen; arb.num.(proc.) = ?

**Plasma—**  
**Erythrocyte Kp<sup>a</sup> antibody;**  
**arbitrary concentration(20 °C; procedure)**  
**NPU20653**  
P—Erythrocyte Kp<sup>a</sup> antibody; arb.c.(20 °C; proc.) = ?

**Plasma—**  
**Erythrocyte Kp<sup>a</sup> antibody;**  
**arbitrary concentration(37 °C; procedure)**  
**NPU20654**  
P—Erythrocyte Kp<sup>a</sup> antibody; arb.c.(37 °C; proc.) = ?

**Plasma—**  
**Erythrocyte Kp<sup>a</sup> antibody;**  
**arbitrary substance concentration(20 °C; procedure)**  
**arbitrary unit/litre**  
**NPU21105**  
P—Erythrocyte Kp<sup>a</sup> antibody; arb.subst.c.(20 °C; proc.) = ?  
arb.unit/l

**Plasma—**  
**Erythrocyte Kp<sup>a</sup> antibody;**  
**arbitrary substance concentration(37 °C; procedure)**  
**arbitrary unit/litre**  
**NPU21106**  
P—Erythrocyte Kp<sup>a</sup> antibody; arb.subst.c.(37 °C; proc.) = ?  
arb.unit/l

**Erythrocytes(Blood)—**  
**Erythrocyte Kp<sup>a</sup> antigen;**  
**arbitrary number(procedure)**  
**NPU20312**  
ErCs(B)—Erythrocyte Kp<sup>a</sup> antigen; arb.num.(proc.) = ?

**Plasma—**  
**Erythrocyte Kp<sup>b</sup>antibody;**  
**arbitrary concentration(20 °C; procedure)**  
**NPU20655**  
P—Erythrocyte Kp<sup>b</sup>antibody; arb.c.(20 °C; proc.) = ?

**Plasma—**  
**Erythrocyte Kp<sup>b</sup>antibody;**  
**arbitrary concentration(37 °C; procedure)**  
**NPU20656**  
P—Erythrocyte Kp<sup>b</sup>antibody; arb.c.(37 °C; proc.) = ?

**Plasma—**  
**Erythrocyte Kp<sup>b</sup>antibody;**  
**arbitrary substance concentration(20 °C; procedure)**  
**arbitrary unit/litre**  
**NPU21107**  
P—Erythrocyte Kp<sup>b</sup>antibody; arb.subst.c.(20 °C; proc.) = ?  
arb.unit/l

**Plasma—**  
**Erythrocyte Kp<sup>b</sup>antibody;**  
**arbitrary substance concentration(37 °C; procedure)**  
**arbitrary unit/litre**  
**NPU21108**  
P—Erythrocyte Kp<sup>b</sup>antibody; arb.subst.c.(37 °C; proc.) = ?  
arb.unit/l

**Erythrocytes(Blood)—**  
**Erythrocyte Kp<sup>b</sup>antigen;**  
**arbitrary number(procedure)**  
**NPU20313**  
ErCs(B)—Erythrocyte Kp<sup>b</sup>antigen; arb.num.(proc.) = ?

**Plasma—**  
**Erythrocyte Kp<sup>c</sup> antibody;**  
**arbitrary concentration(20 °C; procedure)**  
**NPU20657**  
P—Erythrocyte Kp<sup>c</sup> antibody; arb.c.(20 °C; proc.) = ?

**Plasma—**  
**Erythrocyte Kp<sup>c</sup> antibody;**  
**arbitrary concentration(37 °C; procedure)**  
**NPU20658**  
P—Erythrocyte Kp<sup>c</sup> antibody; arb.c.(37 °C; proc.) = ?

**Plasma—**  
**Erythrocyte Kp<sup>c</sup> antibody;**  
**arbitrary substance concentration(20 °C; procedure)**  
**arbitrary unit/litre**  
**NPU21109**  
P—Erythrocyte Kp<sup>c</sup> antibody; arb.subst.c.(20 °C; proc.) = ?  
arb.unit/l

**Plasma—**  
**Erythrocyte Kp<sup>c</sup> antibody;**  
**arbitrary substance concentration(37 °C; procedure)**  
**arbitrary unit/litre**  
**NPU21110**  
P—Erythrocyte Kp<sup>c</sup> antibody; arb.subst.c.(37 °C; proc.) = ?  
arb.unit/l

**Erythrocytes(Blood)—**  
**Erythrocyte Kp<sup>c</sup> antigen;**  
**arbitrary number(procedure)**  
**NPU20314**  
ErCs(B)—Erythrocyte Kp<sup>c</sup> antigen; arb.num.(proc.) = ?

**Plasma—**  
**Erythrocyte KREP antibody;**  
**arbitrary concentration(20 °C; procedure)**  
**NPU20659**  
P—Erythrocyte KREP antibody; arb.c.(20 °C; proc.) = ?

**Plasma—**  
**Erythrocyte KREP antibody;**  
**arbitrary concentration(37 °C; procedure)**  
**NPU20660**  
P—Erythrocyte KREP antibody; arb.c.(37 °C; proc.) = ?

**Plasma—**  
**Erythrocyte KREP antibody;**  
**arbitrary substance concentration(20 °C; procedure)**  
**arbitrary unit/litre**  
**NPU21111**  
P—Erythrocyte KREP antibody; arb.subst.c.(20 °C; proc.) = ?  
arb.unit/l

**Plasma—**  
**Erythrocyte KREP antibody;**  
**arbitrary substance concentration(37 °C; procedure)**  
**arbitrary unit/litre**  
**NPU21112**  
P—Erythrocyte KREP antibody; arb.subst.c.(37 °C; proc.) = ?  
arb.unit/l

**Erythrocytes(Blood)—**  
**Erythrocyte KREP antigen;**  
**arbitrary number(procedure)**  
**NPU20315**  
ErCs(B)—Erythrocyte KREP antigen; arb.num.(proc.) = ?

**Plasma—**  
**Erythrocyte Ku antibody;**  
**arbitrary concentration(20 °C; procedure)**  
**NPU20661**  
P—Erythrocyte Ku antibody; arb.c.(20 °C; proc.) = ?

**Plasma—**  
**Erythrocyte Ku antibody;**  
 arbitrary concentration(37 °C; procedure)  
 NPU20662  
 P—Erythrocyte Ku antibody; arb.c.(37 °C; proc.) = ?

**Plasma—**  
**Erythrocyte Ku antibody;**  
 arbitrary substance concentration(20 °C; procedure)  
 arbitrary unit/litre  
 NPU21113  
 P—Erythrocyte Ku antibody; arb.subst.c.(20 °C; proc.) = ?  
 arb.unit/l

**Plasma—**  
**Erythrocyte Ku antibody;**  
 arbitrary substance concentration(37 °C; procedure)  
 arbitrary unit/litre  
 NPU21114  
 P—Erythrocyte Ku antibody; arb.subst.c.(37 °C; proc.) = ?  
 arb.unit/l

**Erythrocytes(Blood)—**  
**Erythrocyte Ku antigen;**  
 arbitrary number(procedure)  
 NPU20316  
 Ercs(B)—Erythrocyte Ku antigen; arb.num.(proc.) = ?

**Plasma—**  
**Erythrocyte Kx antibody;**  
 arbitrary concentration(20 °C; procedure)  
 NPU20663  
 P—Erythrocyte Kx antibody; arb.c.(20 °C; proc.) = ?

**Plasma—**  
**Erythrocyte Kx antibody;**  
 arbitrary concentration(37 °C; procedure)  
 NPU20664  
 P—Erythrocyte Kx antibody; arb.c.(37 °C; proc.) = ?

**Plasma—**  
**Erythrocyte Kx antibody;**  
 arbitrary substance concentration(20 °C; procedure)  
 arbitrary unit/litre  
 NPU21115  
 P—Erythrocyte Kx antibody; arb.subst.c.(20 °C; proc.) = ?  
 arb.unit/l

**Plasma—**  
**Erythrocyte Kx antibody;**  
 arbitrary substance concentration(37 °C; procedure)  
 arbitrary unit/litre  
 NPU21116  
 P—Erythrocyte Kx antibody; arb.subst.c.(37 °C; proc.) = ?  
 arb.unit/l

**Erythrocytes(Blood)—**  
**Erythrocyte Kx antigen;**  
 arbitrary number(procedure)  
 NPU20317  
 Ercs(B)—Erythrocyte Kx antigen; arb.num.(proc.) = ?

**Plasma—**  
**Erythrocyte Le<sup>a</sup> antibody;**  
 arbitrary concentration(20 °C; procedure)  
 NPU20665  
 P—Erythrocyte Le<sup>a</sup> antibody; arb.c.(20 °C; proc.) = ?

**Plasma—**  
**Erythrocyte Le<sup>a</sup> antibody;**  
 arbitrary concentration(37 °C; procedure)  
 NPU20666  
 P—Erythrocyte Le<sup>a</sup> antibody; arb.c.(37 °C; proc.) = ?

**Plasma—**  
**Erythrocyte Le<sup>a</sup> antibody;**  
 arbitrary substance concentration(20 °C; procedure)  
 arbitrary unit/litre  
 NPU21117  
 P—Erythrocyte Le<sup>a</sup> antibody; arb.subst.c.(20 °C; proc.) = ?  
 arb.unit/l

**Plasma—**  
**Erythrocyte Le<sup>a</sup> antibody;**  
 arbitrary substance concentration(37 °C; procedure)  
 arbitrary unit/litre  
 NPU21118  
 P—Erythrocyte Le<sup>a</sup> antibody; arb.subst.c.(37 °C; proc.) = ?  
 arb.unit/l

**Erythrocytes(Blood)—**  
**Erythrocyte Le<sup>a</sup> antigen;**  
 arbitrary number(procedure)  
 NPU20318  
 Ercs(B)—Erythrocyte Le<sup>a</sup> antigen; arb.num.(proc.) = ?

**Plasma—**  
**Erythrocyte Le<sup>ab</sup> antibody;**  
 arbitrary concentration(20 °C; procedure)  
 NPU20667  
 P—Erythrocyte Le<sup>ab</sup> antibody; arb.c.(20 °C; proc.) = ?

**Plasma—**  
**Erythrocyte Le<sup>ab</sup> antibody;**  
 arbitrary concentration(37 °C; procedure)  
 NPU20668  
 P—Erythrocyte Le<sup>ab</sup> antibody; arb.c.(37 °C; proc.) = ?

**Plasma—**  
**Erythrocyte Le<sup>ab</sup> antibody;**  
 arbitrary substance concentration(20 °C; procedure)  
 arbitrary unit/litre  
 NPU21119  
 P—Erythrocyte Le<sup>ab</sup> antibody; arb.subst.c.(20 °C; proc.) = ?  
 arb.unit/l

**Plasma—**  
**Erythrocyte Le<sup>ab</sup> antibody;**  
 arbitrary substance concentration(37 °C; procedure)  
 arbitrary unit/litre  
 NPU21120  
 P—Erythrocyte Le<sup>ab</sup> antibody; arb.subst.c.(37 °C; proc.) = ?  
 arb.unit/l

**Erythrocytes(Blood)—**  
**Erythrocyte Le<sup>ab</sup> antigen;**  
 arbitrary number(procedure)  
 NPU20319  
 Ercs(B)—Erythrocyte Le<sup>ab</sup> antigen; arb.num.(proc.) = ?

**Plasma—**  
**Erythrocyte Le<sup>b</sup> antibody;**  
 arbitrary concentration(20 °C; procedure)  
 NPU20669  
 P—Erythrocyte Le<sup>b</sup> antibody; arb.c.(20 °C; proc.) = ?

**Plasma—**  
**Erythrocyte Le<sup>b</sup> antibody;**  
 arbitrary concentration(37 °C; procedure)  
 NPU20670  
 P—Erythrocyte Le<sup>b</sup> antibody; arb.c.(37 °C; proc.) = ?

**Plasma—**  
**Erythrocyte Le<sup>b</sup> antibody;**  
 arbitrary substance concentration(20 °C; procedure)  
 arbitrary unit/litre  
 NPU21121  
 P—Erythrocyte Le<sup>b</sup> antibody; arb.subst.c.(20 °C; proc.) = ?  
 arb.unit/l

**Plasma—**  
**Erythrocyte Le<sup>b</sup> antibody;**  
arbitrary substance concentration(37 °C; procedure)  
arbitrary unit/litre  
**NPU21122**  
P—Erythrocyte Le<sup>b</sup> antibody; arb.subst.c.(37 °C; proc.) = ?  
arb.unit/l

**Erythrocytes(Blood)—**  
**Erythrocyte Le<sup>b</sup> antigen;**  
arbitrary number(procedure)  
**NPU20320**  
Ercs(B)—Erythrocyte Le<sup>b</sup> antigen; arb.num.(proc.) = ?

**Plasma—**  
**Erythrocyte Le<sup>bH</sup> antibody;**  
arbitrary concentration(20 °C; procedure)  
**NPU20671**  
P—Erythrocyte Le<sup>bH</sup> antibody; arb.c.(20 °C; proc.) = ?

**Plasma—**  
**Erythrocyte Le<sup>bH</sup> antibody;**  
arbitrary concentration(37 °C; procedure)  
**NPU20672**  
P—Erythrocyte Le<sup>bH</sup> antibody; arb.c.(37 °C; proc.) = ?

**Plasma—**  
**Erythrocyte Le<sup>bH</sup> antibody;**  
arbitrary substance concentration(20 °C; procedure)  
arbitrary unit/litre  
**NPU21123**  
P—Erythrocyte Le<sup>bH</sup> antibody; arb.subst.c.(20 °C; proc.) = ?  
arb.unit/l

**Plasma—**  
**Erythrocyte Le<sup>bH</sup> antibody;**  
arbitrary substance concentration(37 °C; procedure)  
arbitrary unit/litre  
**NPU21124**  
P—Erythrocyte Le<sup>bH</sup> antibody; arb.subst.c.(37 °C; proc.) = ?  
arb.unit/l

**Erythrocytes(Blood)—**  
**Erythrocyte Le<sup>bH</sup> antigen;**  
arbitrary number(procedure)  
**NPU20321**  
Ercs(B)—Erythrocyte Le<sup>bH</sup> antigen; arb.num.(proc.) = ?

**Plasma—**  
**Erythrocyte Ls<sup>a</sup> antibody;**  
arbitrary concentration(20 °C; procedure)  
**NPU20673**  
P—Erythrocyte Ls<sup>a</sup> antibody; arb.c.(20 °C; proc.) = ?

**Plasma—**  
**Erythrocyte Ls<sup>a</sup> antibody;**  
arbitrary concentration(37 °C; procedure)  
**NPU20674**  
P—Erythrocyte Ls<sup>a</sup> antibody; arb.c.(37 °C; proc.) = ?

**Plasma—**  
**Erythrocyte Ls<sup>a</sup> antibody;**  
arbitrary substance concentration(20 °C; procedure)  
arbitrary unit/litre  
**NPU21125**  
P—Erythrocyte Ls<sup>a</sup> antibody; arb.subst.c.(20 °C; proc.) = ?  
arb.unit/l

**Plasma—**  
**Erythrocyte Ls<sup>a</sup> antibody;**  
arbitrary substance concentration(37 °C; procedure)  
arbitrary unit/litre  
**NPU21126**  
P—Erythrocyte Ls<sup>a</sup> antibody; arb.subst.c.(37 °C; proc.) = ?  
arb.unit/l

**Erythrocytes(Blood)—**  
**Erythrocyte Ls<sup>a</sup> antigen;**  
arbitrary number(procedure)  
**NPU20322**  
Ercs(B)—Erythrocyte Ls<sup>a</sup> antigen; arb.num.(proc.) = ?

**Plasma—**  
**Erythrocyte Lu<sup>a</sup> antibody;**  
arbitrary concentration(20 °C; procedure)  
**NPU20703**  
P—Erythrocyte Lu<sup>a</sup> antibody; arb.c.(20 °C; proc.) = ?

**Plasma—**  
**Erythrocyte Lu<sup>a</sup> antibody;**  
arbitrary concentration(37 °C; procedure)  
**NPU20704**  
P—Erythrocyte Lu<sup>a</sup> antibody; arb.c.(37 °C; proc.) = ?

**Plasma—**  
**Erythrocyte Lu<sup>a</sup> antibody;**  
arbitrary substance concentration(20 °C; procedure)  
arbitrary unit/litre  
**NPU21155**  
P—Erythrocyte Lu<sup>a</sup> antibody; arb.subst.c.(20 °C; proc.) = ?  
arb.unit/l

**Plasma—**  
**Erythrocyte Lu<sup>a</sup> antibody;**  
arbitrary substance concentration(37 °C; procedure)  
arbitrary unit/litre  
**NPU21156**  
P—Erythrocyte Lu<sup>a</sup> antibody; arb.subst.c.(37 °C; proc.) = ?  
arb.unit/l

**Erythrocytes(Blood)—**  
**Erythrocyte Lu<sup>a</sup> antigen;**  
arbitrary number(procedure)  
**NPU20337**  
Ercs(B)—Erythrocyte Lu<sup>a</sup> antigen; arb.num.(proc.) = ?

**Plasma—**  
**Erythrocyte Lu<sup>b</sup> antibody;**  
arbitrary concentration(20 °C; procedure)  
**NPU20705**  
P—Erythrocyte Lu<sup>b</sup> antibody; arb.c.(20 °C; proc.) = ?

**Plasma—**  
**Erythrocyte Lu<sup>b</sup> antibody;**  
arbitrary concentration(37 °C; procedure)  
**NPU20706**  
P—Erythrocyte Lu<sup>b</sup> antibody; arb.c.(37 °C; proc.) = ?

**Plasma—**  
**Erythrocyte Lu<sup>b</sup> antibody;**  
arbitrary substance concentration(20 °C; procedure)  
arbitrary unit/litre  
**NPU21157**  
P—Erythrocyte Lu<sup>b</sup> antibody; arb.subst.c.(20 °C; proc.) = ?  
arb.unit/l

**Plasma—**  
**Erythrocyte Lu<sup>b</sup> antibody;**  
arbitrary substance concentration(37 °C; procedure)  
arbitrary unit/litre  
**NPU21158**  
P—Erythrocyte Lu<sup>b</sup> antibody; arb.subst.c.(37 °C; proc.) = ?  
arb.unit/l

**Erythrocytes(Blood)—**  
**Erythrocyte Lu<sup>b</sup> antigen;**  
arbitrary number(procedure)  
**NPU20338**  
Ercs(B)—Erythrocyte Lu<sup>b</sup> antigen; arb.num.(proc.) = ?

**Plasma—**  
**Erythrocyte Lu11 antibody;**  
**arbitrary concentration(20 °C; procedure)**  
**NPU20675**  
P—Erythrocyte Lu11 antibody; arb.c.(20 °C; proc.) = ?

**Plasma—**  
**Erythrocyte Lu11 antibody;**  
**arbitrary concentration(37 °C; procedure)**  
**NPU20676**  
P—Erythrocyte Lu11 antibody; arb.c.(37 °C; proc.) = ?

**Plasma—**  
**Erythrocyte Lu11 antibody;**  
**arbitrary substance concentration(20 °C; procedure)**  
**arbitrary unit/litre**  
**NPU21127**  
P—Erythrocyte Lu11 antibody; arb.subst.c.(20 °C; proc.) = ?  
arb.unit/l

**Plasma—**  
**Erythrocyte Lu11 antibody;**  
**arbitrary substance concentration(37 °C; procedure)**  
**arbitrary unit/litre**  
**NPU21128**  
P—Erythrocyte Lu11 antibody; arb.subst.c.(37 °C; proc.) = ?  
arb.unit/l

**Erythrocytes(Blood)—**  
**Erythrocyte Lu11 antigen;**  
**arbitrary number(procedure)**  
**NPU20323**  
ErCs(B)—Erythrocyte Lu11 antigen; arb.num.(proc.) = ?

**Plasma—**  
**Erythrocyte Lu12 antibody;**  
**arbitrary concentration(20 °C; procedure)**  
**NPU20677**  
P—Erythrocyte Lu12 antibody; arb.c.(20 °C; proc.) = ?

**Plasma—**  
**Erythrocyte Lu12 antibody;**  
**arbitrary concentration(37 °C; procedure)**  
**NPU20678**  
P—Erythrocyte Lu12 antibody; arb.c.(37 °C; proc.) = ?

**Plasma—**  
**Erythrocyte Lu12 antibody;**  
**arbitrary substance concentration(20 °C; procedure)**  
**arbitrary unit/litre**  
**NPU21129**  
P—Erythrocyte Lu12 antibody; arb.subst.c.(20 °C; proc.) = ?  
arb.unit/l

**Plasma—**  
**Erythrocyte Lu12 antibody;**  
**arbitrary substance concentration(37 °C; procedure)**  
**arbitrary unit/litre**  
**NPU21130**  
P—Erythrocyte Lu12 antibody; arb.subst.c.(37 °C; proc.) = ?  
arb.unit/l

**Erythrocytes(Blood)—**  
**Erythrocyte Lu12 antigen;**  
**arbitrary number(procedure)**  
**NPU20324**  
ErCs(B)—Erythrocyte Lu12 antigen; arb.num.(proc.) = ?

**Plasma—**  
**Erythrocyte Lu13 antibody;**  
**arbitrary concentration(20 °C; procedure)**  
**NPU20679**  
P—Erythrocyte Lu13 antibody; arb.c.(20 °C; proc.) = ?

**Plasma—**  
**Erythrocyte Lu13 antibody;**  
**arbitrary concentration(37 °C; procedure)**  
**NPU20680**  
P—Erythrocyte Lu13 antibody; arb.c.(37 °C; proc.) = ?

**Plasma—**  
**Erythrocyte Lu13 antibody;**  
**arbitrary substance concentration(20 °C; procedure)**  
**arbitrary unit/litre**  
**NPU21131**  
P—Erythrocyte Lu13 antibody; arb.subst.c.(20 °C; proc.) = ?  
arb.unit/l

**Plasma—**  
**Erythrocyte Lu13 antibody;**  
**arbitrary substance concentration(37 °C; procedure)**  
**arbitrary unit/litre**  
**NPU21132**  
P—Erythrocyte Lu13 antibody; arb.subst.c.(37 °C; proc.) = ?  
arb.unit/l

**Erythrocytes(Blood)—**  
**Erythrocyte Lu13 antigen;**  
**arbitrary number(procedure)**  
**NPU20325**  
ErCs(B)—Erythrocyte Lu13 antigen; arb.num.(proc.) = ?

**Plasma—**  
**Erythrocyte Lu14 antibody;**  
**arbitrary concentration(20 °C; procedure)**  
**NPU20681**  
P—Erythrocyte Lu14 antibody; arb.c.(20 °C; proc.) = ?

**Plasma—**  
**Erythrocyte Lu14 antibody;**  
**arbitrary concentration(37 °C; procedure)**  
**NPU20682**  
P—Erythrocyte Lu14 antibody; arb.c.(37 °C; proc.) = ?

**Plasma—**  
**Erythrocyte Lu14 antibody;**  
**arbitrary substance concentration(20 °C; procedure)**  
**arbitrary unit/litre**  
**NPU21133**  
P—Erythrocyte Lu14 antibody; arb.subst.c.(20 °C; proc.) = ?  
arb.unit/l

**Plasma—**  
**Erythrocyte Lu14 antibody;**  
**arbitrary substance concentration(37 °C; procedure)**  
**arbitrary unit/litre**  
**NPU21134**  
P—Erythrocyte Lu14 antibody; arb.subst.c.(37 °C; proc.) = ?  
arb.unit/l

**Erythrocytes(Blood)—**  
**Erythrocyte Lu14 antigen;**  
**arbitrary number(procedure)**  
**NPU20326**  
ErCs(B)—Erythrocyte Lu14 antigen; arb.num.(proc.) = ?

**Plasma—**  
**Erythrocyte Lu16 antibody;**  
**arbitrary concentration(20 °C; procedure)**  
**NPU20683**  
P—Erythrocyte Lu16 antibody; arb.c.(20 °C; proc.) = ?

**Plasma—**  
**Erythrocyte Lu16 antibody;**  
**arbitrary concentration(37 °C; procedure)**  
**NPU20684**  
P—Erythrocyte Lu16 antibody; arb.c.(37 °C; proc.) = ?

**Plasma—**  
**Erythrocyte Lu16 antibody;**  
arbitrary substance concentration(20 °C; procedure)  
arbitrary unit/litre  
**NPU21135**  
P—Erythrocyte Lu16 antibody; arb.subst.c.(20 °C; proc.) = ?  
arb.unit/l

**Plasma—**  
**Erythrocyte Lu16 antibody;**  
arbitrary substance concentration(37 °C; procedure)  
arbitrary unit/litre  
**NPU21136**  
P—Erythrocyte Lu16 antibody; arb.subst.c.(37 °C; proc.) = ?  
arb.unit/l

**Erythrocytes(Blood)—**  
**Erythrocyte Lu16 antigen;**  
arbitrary number(procedure)  
**NPU20327**  
Ercs(B)—Erythrocyte Lu16 antigen; arb.num.(proc.) = ?

**Plasma—**  
**Erythrocyte Lu17 antibody;**  
arbitrary concentration(20 °C; procedure)  
**NPU20685**  
P—Erythrocyte Lu17 antibody; arb.c.(20 °C; proc.) = ?

**Plasma—**  
**Erythrocyte Lu17 antibody;**  
arbitrary concentration(37 °C; procedure)  
**NPU20686**  
P—Erythrocyte Lu17 antibody; arb.c.(37 °C; proc.) = ?

**Plasma—**  
**Erythrocyte Lu17 antibody;**  
arbitrary substance concentration(20 °C; procedure)  
arbitrary unit/litre  
**NPU21137**  
P—Erythrocyte Lu17 antibody; arb.subst.c.(20 °C; proc.) = ?  
arb.unit/l

**Plasma—**  
**Erythrocyte Lu17 antibody;**  
arbitrary substance concentration(37 °C; procedure)  
arbitrary unit/litre  
**NPU21138**  
P—Erythrocyte Lu17 antibody; arb.subst.c.(37 °C; proc.) = ?  
arb.unit/l

**Erythrocytes(Blood)—**  
**Erythrocyte Lu17 antigen;**  
arbitrary number(procedure)  
**NPU20328**  
Ercs(B)—Erythrocyte Lu17 antigen; arb.num.(proc.) = ?

**Plasma—**  
**Erythrocyte Lu20 antibody;**  
arbitrary concentration(20 °C; procedure)  
**NPU20687**  
P—Erythrocyte Lu20 antibody; arb.c.(20 °C; proc.) = ?

**Plasma—**  
**Erythrocyte Lu20 antibody;**  
arbitrary concentration(37 °C; procedure)  
**NPU20688**  
P—Erythrocyte Lu20 antibody; arb.c.(37 °C; proc.) = ?

**Plasma—**  
**Erythrocyte Lu20 antibody;**  
arbitrary substance concentration(20 °C; procedure)  
arbitrary unit/litre  
**NPU21139**  
P—Erythrocyte Lu20 antibody; arb.subst.c.(20 °C; proc.) = ?  
arb.unit/l

**Plasma—**  
**Erythrocyte Lu20 antibody;**  
arbitrary substance concentration(37 °C; procedure)  
arbitrary unit/litre  
**NPU21140**  
P—Erythrocyte Lu20 antibody; arb.subst.c.(37 °C; proc.) = ?  
arb.unit/l

**Erythrocytes(Blood)—**  
**Erythrocyte Lu20 antigen;**  
arbitrary number(procedure)  
**NPU20329**  
Ercs(B)—Erythrocyte Lu20 antigen; arb.num.(proc.) = ?

**Plasma—**  
**Erythrocyte Lu3 antibody;**  
arbitrary concentration(20 °C; procedure)  
**NPU20689**  
P—Erythrocyte Lu3 antibody; arb.c.(20 °C; proc.) = ?

**Plasma—**  
**Erythrocyte Lu3 antibody;**  
arbitrary concentration(37 °C; procedure)  
**NPU20690**  
P—Erythrocyte Lu3 antibody; arb.c.(37 °C; proc.) = ?

**Plasma—**  
**Erythrocyte Lu3 antibody;**  
arbitrary substance concentration(20 °C; procedure)  
arbitrary unit/litre  
**NPU21141**  
P—Erythrocyte Lu3 antibody; arb.subst.c.(20 °C; proc.) = ?  
arb.unit/l

**Plasma—**  
**Erythrocyte Lu3 antibody;**  
arbitrary substance concentration(37 °C; procedure)  
arbitrary unit/litre  
**NPU21142**  
P—Erythrocyte Lu3 antibody; arb.subst.c.(37 °C; proc.) = ?  
arb.unit/l

**Erythrocytes(Blood)—**  
**Erythrocyte Lu3 antigen;**  
arbitrary number(procedure)  
**NPU20330**  
Ercs(B)—Erythrocyte Lu3 antigen; arb.num.(proc.) = ?

**Plasma—**  
**Erythrocyte Lu4 antibody;**  
arbitrary concentration(20 °C; procedure)  
**NPU20691**  
P—Erythrocyte Lu4 antibody; arb.c.(20 °C; proc.) = ?

**Plasma—**  
**Erythrocyte Lu4 antibody;**  
arbitrary concentration(37 °C; procedure)  
**NPU20692**  
P—Erythrocyte Lu4 antibody; arb.c.(37 °C; proc.) = ?

**Plasma—**  
**Erythrocyte Lu4 antibody;**  
arbitrary substance concentration(20 °C; procedure)  
arbitrary unit/litre  
**NPU21143**  
P—Erythrocyte Lu4 antibody; arb.subst.c.(20 °C; proc.) = ?  
arb.unit/l

**Plasma—**  
**Erythrocyte Lu4 antibody;**  
arbitrary substance concentration(37 °C; procedure)  
arbitrary unit/litre  
**NPU21144**  
P—Erythrocyte Lu4 antibody; arb.subst.c.(37 °C; proc.) = ?  
arb.unit/l

**Erythrocytes(Blood)—**  
**Erythrocyte Lu4 antigen;**  
**arbitrary number(procedure)**  
**NPU20331**  
ErCs(B)—Erythrocyte Lu4 antigen; arb.num.(proc.) = ?

**Plasma—**  
**Erythrocyte Lu5 antibody;**  
**arbitrary concentration(20 °C; procedure)**  
**NPU20693**  
P—Erythrocyte Lu5 antibody; arb.c.(20 °C; proc.) = ?

**Plasma—**  
**Erythrocyte Lu5 antibody;**  
**arbitrary concentration(37 °C; procedure)**  
**NPU20694**  
P—Erythrocyte Lu5 antibody; arb.c.(37 °C; proc.) = ?

**Plasma—**  
**Erythrocyte Lu5 antibody;**  
**arbitrary substance concentration(20 °C; procedure)**  
**arbitrary unit/litre**  
**NPU21145**  
P—Erythrocyte Lu5 antibody; arb.subst.c.(20 °C; proc.) = ?  
arb.unit/l

**Plasma—**  
**Erythrocyte Lu5 antibody;**  
**arbitrary substance concentration(37 °C; procedure)**  
**arbitrary unit/litre**  
**NPU21146**  
P—Erythrocyte Lu5 antibody; arb.subst.c.(37 °C; proc.) = ?  
arb.unit/l

**Erythrocytes(Blood)—**  
**Erythrocyte Lu5 antigen;**  
**arbitrary number(procedure)**  
**NPU20332**  
ErCs(B)—Erythrocyte Lu5 antigen; arb.num.(proc.) = ?

**Plasma—**  
**Erythrocyte Lu6 antibody;**  
**arbitrary concentration(20 °C; procedure)**  
**NPU20695**  
P—Erythrocyte Lu6 antibody; arb.c.(20 °C; proc.) = ?

**Plasma—**  
**Erythrocyte Lu6 antibody;**  
**arbitrary concentration(37 °C; procedure)**  
**NPU20696**  
P—Erythrocyte Lu6 antibody; arb.c.(37 °C; proc.) = ?

**Plasma—**  
**Erythrocyte Lu6 antibody;**  
**arbitrary substance concentration(20 °C; procedure)**  
**arbitrary unit/litre**  
**NPU21147**  
P—Erythrocyte Lu6 antibody; arb.subst.c.(20 °C; proc.) = ?  
arb.unit/l

**Plasma—**  
**Erythrocyte Lu6 antibody;**  
**arbitrary substance concentration(37 °C; procedure)**  
**arbitrary unit/litre**  
**NPU21148**  
P—Erythrocyte Lu6 antibody; arb.subst.c.(37 °C; proc.) = ?  
arb.unit/l

**Erythrocytes(Blood)—**  
**Erythrocyte Lu6 antigen;**  
**arbitrary number(procedure)**  
**NPU20333**  
ErCs(B)—Erythrocyte Lu6 antigen; arb.num.(proc.) = ?

**Plasma—**  
**Erythrocyte Lu7 antibody;**  
**arbitrary concentration(20 °C; procedure)**  
**NPU20697**  
P—Erythrocyte Lu7 antibody; arb.c.(20 °C; proc.) = ?

**Plasma—**  
**Erythrocyte Lu7 antibody;**  
**arbitrary concentration(37 °C; procedure)**  
**NPU20698**  
P—Erythrocyte Lu7 antibody; arb.c.(37 °C; proc.) = ?

**Plasma—**  
**Erythrocyte Lu7 antibody;**  
**arbitrary substance concentration(20 °C; procedure)**  
**arbitrary unit/litre**  
**NPU21149**  
P—Erythrocyte Lu7 antibody; arb.subst.c.(20 °C; proc.) = ?  
arb.unit/l

**Plasma—**  
**Erythrocyte Lu7 antibody;**  
**arbitrary substance concentration(37 °C; procedure)**  
**arbitrary unit/litre**  
**NPU21150**  
P—Erythrocyte Lu7 antibody; arb.subst.c.(37 °C; proc.) = ?  
arb.unit/l

**Erythrocytes(Blood)—**  
**Erythrocyte Lu7 antigen;**  
**arbitrary number(procedure)**  
**NPU20334**  
ErCs(B)—Erythrocyte Lu7 antigen; arb.num.(proc.) = ?

**Plasma—**  
**Erythrocyte Lu8 antibody;**  
**arbitrary concentration(20 °C; procedure)**  
**NPU20699**  
P—Erythrocyte Lu8 antibody; arb.c.(20 °C; proc.) = ?

**Plasma—**  
**Erythrocyte Lu8 antibody;**  
**arbitrary concentration(37 °C; procedure)**  
**NPU20700**  
P—Erythrocyte Lu8 antibody; arb.c.(37 °C; proc.) = ?

**Plasma—**  
**Erythrocyte Lu8 antibody;**  
**arbitrary substance concentration(20 °C; procedure)**  
**arbitrary unit/litre**  
**NPU21151**  
P—Erythrocyte Lu8 antibody; arb.subst.c.(20 °C; proc.) = ?  
arb.unit/l

**Plasma—**  
**Erythrocyte Lu8 antibody;**  
**arbitrary substance concentration(37 °C; procedure)**  
**arbitrary unit/litre**  
**NPU21152**  
P—Erythrocyte Lu8 antibody; arb.subst.c.(37 °C; proc.) = ?  
arb.unit/l

**Erythrocytes(Blood)—**  
**Erythrocyte Lu8 antigen;**  
**arbitrary number(procedure)**  
**NPU20335**  
ErCs(B)—Erythrocyte Lu8 antigen; arb.num.(proc.) = ?

**Plasma—**  
**Erythrocyte Lu9 antibody;**  
**arbitrary concentration(20 °C; procedure)**  
**NPU20701**  
P—Erythrocyte Lu9 antibody; arb.c.(20 °C; proc.) = ?

**Plasma—**  
**Erythrocyte Lu9 antibody;**  
**arbitrary concentration(37 °C; procedure)**  
**NPU20702**  
P—Erythrocyte Lu9 antibody; arb.c.(37 °C; proc.) = ?

**Plasma—**  
**Erythrocyte Lu9 antibody;**  
**arbitrary substance concentration(20 °C; procedure)**  
**arbitrary unit/litre**  
**NPU21153**  
P—Erythrocyte Lu9 antibody; arb.subst.c.(20 °C; proc.) = ?  
arb.unit/l

**Plasma—**  
**Erythrocyte Lu9 antibody;**  
**arbitrary substance concentration(37 °C; procedure)**  
**arbitrary unit/litre**  
**NPU21154**  
P—Erythrocyte Lu9 antibody; arb.subst.c.(37 °C; proc.) = ?  
arb.unit/l

**Erythrocytes(Blood)—**  
**Erythrocyte Lu9 antigen;**  
**arbitrary number(procedure)**  
**NPU20336**  
Ercs(B)—Erythrocyte Lu9 antigen; arb.num.(proc.) = ?

**Plasma—**  
**Erythrocyte LW<sup>a</sup> antibody;**  
**arbitrary concentration(20 °C; procedure)**  
**NPU20707**  
P—Erythrocyte LW<sup>a</sup> antibody; arb.c.(20 °C; proc.) = ?

**Plasma—**  
**Erythrocyte LW<sup>a</sup> antibody;**  
**arbitrary concentration(37 °C; procedure)**  
**NPU20708**  
P—Erythrocyte LW<sup>a</sup> antibody; arb.c.(37 °C; proc.) = ?

**Plasma—**  
**Erythrocyte LW<sup>a</sup> antibody;**  
**arbitrary substance concentration(20 °C; procedure)**  
**arbitrary unit/litre**  
**NPU21159**  
P—Erythrocyte LW<sup>a</sup> antibody; arb.subst.c.(20 °C; proc.) = ?  
arb.unit/l

**Plasma—**  
**Erythrocyte LW<sup>a</sup> antibody;**  
**arbitrary substance concentration(37 °C; procedure)**  
**arbitrary unit/litre**  
**NPU21160**  
P—Erythrocyte LW<sup>a</sup> antibody; arb.subst.c.(37 °C; proc.) = ?  
arb.unit/l

**Erythrocytes(Blood)—**  
**Erythrocyte LW<sup>a</sup> antigen;**  
**arbitrary number(procedure)**  
**NPU20339**  
Ercs(B)—Erythrocyte LW<sup>a</sup> antigen; arb.num.(proc.) = ?

**Plasma—**  
**Erythrocyte LW<sup>ab</sup> antibody;**  
**arbitrary concentration(20 °C; procedure)**  
**NPU20709**  
P—Erythrocyte LW<sup>ab</sup> antibody; arb.c.(20 °C; proc.) = ?

**Plasma—**  
**Erythrocyte LW<sup>ab</sup> antibody;**  
**arbitrary concentration(37 °C; procedure)**  
**NPU20710**  
P—Erythrocyte LW<sup>ab</sup> antibody; arb.c.(37 °C; proc.) = ?

**Plasma—**  
**Erythrocyte LW<sup>ab</sup> antibody;**  
**arbitrary substance concentration(20 °C; procedure)**  
**arbitrary unit/litre**  
**NPU21161**  
P—Erythrocyte LW<sup>ab</sup> antibody; arb.subst.c.(20 °C; proc.) = ?  
arb.unit/l

**Plasma—**  
**Erythrocyte LW<sup>ab</sup> antibody;**  
**arbitrary substance concentration(37 °C; procedure)**  
**arbitrary unit/litre**  
**NPU21162**  
P—Erythrocyte LW<sup>ab</sup> antibody; arb.subst.c.(37 °C; proc.) = ?  
arb.unit/l

**Erythrocytes(Blood)—**  
**Erythrocyte LW<sup>ab</sup> antigen;**  
**arbitrary number(procedure)**  
**NPU20340**  
Ercs(B)—Erythrocyte LW<sup>ab</sup> antigen; arb.num.(proc.) = ?

**Plasma—**  
**Erythrocyte LW<sup>b</sup> antibody;**  
**arbitrary concentration(20 °C; procedure)**  
**NPU20711**  
P—Erythrocyte LW<sup>b</sup> antibody; arb.c.(20 °C; proc.) = ?

**Plasma—**  
**Erythrocyte LW<sup>b</sup> antibody;**  
**arbitrary concentration(37 °C; procedure)**  
**NPU20712**  
P—Erythrocyte LW<sup>b</sup> antibody; arb.c.(37 °C; proc.) = ?

**Plasma—**  
**Erythrocyte LW<sup>b</sup> antibody;**  
**arbitrary substance concentration(20 °C; procedure)**  
**arbitrary unit/litre**  
**NPU21163**  
P—Erythrocyte LW<sup>b</sup> antibody; arb.subst.c.(20 °C; proc.) = ?  
arb.unit/l

**Plasma—**  
**Erythrocyte LW<sup>b</sup> antibody;**  
**arbitrary substance concentration(37 °C; procedure)**  
**arbitrary unit/litre**  
**NPU21164**  
P—Erythrocyte LW<sup>b</sup> antibody; arb.subst.c.(37 °C; proc.) = ?  
arb.unit/l

**Erythrocytes(Blood)—**  
**Erythrocyte LW<sup>b</sup> antigen;**  
**arbitrary number(procedure)**  
**NPU20341**  
Ercs(B)—Erythrocyte LW<sup>b</sup> antigen; arb.num.(proc.) = ?

**Plasma—**  
**Erythrocyte M antibody;**  
**arbitrary concentration(20 °C; procedure)**  
**NPU20713**  
P—Erythrocyte M antibody; arb.c.(20 °C; proc.) = ?

**Plasma—**  
**Erythrocyte M antibody;**  
**arbitrary concentration(37 °C; procedure)**  
**NPU20714**  
P—Erythrocyte M antibody; arb.c.(37 °C; proc.) = ?

**Plasma—**  
**Erythrocyte M antibody;**  
**arbitrary substance concentration(20 °C; procedure)**  
**arbitrary unit/litre**  
**NPU21165**  
P—Erythrocyte M antibody; arb.subst.c.(20 °C; proc.) = ?  
arb.unit/l

**Plasma—**  
**Erythrocyte M antibody;**  
arbitrary substance concentration(37 °C; procedure)  
arbitrary unit/litre  
**NPU21166**  
P—Erythrocyte M antibody; arb.subst.c.(37 °C; proc.) = ?  
arb.unit/l

**Erythrocytes(Blood)—**  
**Erythrocyte M antigen;**  
arbitrary number(procedure)  
**NPU20342**  
ErCs(B)—Erythrocyte M antigen; arb.num.(proc.) = ?

**Plasma—**  
**Erythrocyte M<sup>c</sup> antibody;**  
arbitrary concentration(20 °C; procedure)  
**NPU20719**  
P—Erythrocyte M<sup>c</sup> antibody; arb.c.(20 °C; proc.) = ?

**Plasma—**  
**Erythrocyte M<sup>c</sup> antibody;**  
arbitrary concentration(37 °C; procedure)  
**NPU20720**  
P—Erythrocyte M<sup>c</sup> antibody; arb.c.(37 °C; proc.) = ?

**Plasma—**  
**Erythrocyte M<sup>c</sup> antibody;**  
arbitrary substance concentration(20 °C; procedure)  
arbitrary unit/litre  
**NPU21171**  
P—Erythrocyte M<sup>c</sup> antibody; arb.subst.c.(20 °C; proc.) = ?  
arb.unit/l

**Plasma—**  
**Erythrocyte M<sup>c</sup> antibody;**  
arbitrary substance concentration(37 °C; procedure)  
arbitrary unit/litre  
**NPU21172**  
P—Erythrocyte M<sup>c</sup> antibody; arb.subst.c.(37 °C; proc.) = ?  
arb.unit/l

**Erythrocytes(Blood)—**  
**Erythrocyte M<sup>c</sup> antigen;**  
arbitrary number(procedure)  
**NPU20345**  
ErCs(B)—Erythrocyte M<sup>c</sup> antigen; arb.num.(proc.) = ?

**Plasma—**  
**Erythrocyte M<sup>e</sup> antibody;**  
arbitrary concentration(20 °C; procedure)  
**NPU20725**  
P—Erythrocyte M<sup>e</sup> antibody; arb.c.(20 °C; proc.) = ?

**Plasma—**  
**Erythrocyte M<sup>e</sup> antibody;**  
arbitrary concentration(37 °C; procedure)  
**NPU20726**  
P—Erythrocyte M<sup>e</sup> antibody; arb.c.(37 °C; proc.) = ?

**Plasma—**  
**Erythrocyte M<sup>e</sup> antibody;**  
arbitrary substance concentration(20 °C; procedure)  
arbitrary unit/litre  
**NPU21177**  
P—Erythrocyte M<sup>e</sup> antibody; arb.subst.c.(20 °C; proc.) = ?  
arb.unit/l

**Plasma—**  
**Erythrocyte M<sup>e</sup> antibody;**  
arbitrary substance concentration(37 °C; procedure)  
arbitrary unit/litre  
**NPU21178**  
P—Erythrocyte M<sup>e</sup> antibody; arb.subst.c.(37 °C; proc.) = ?  
arb.unit/l

**Erythrocytes(Blood)—**  
**Erythrocyte M<sup>e</sup> antigen;**  
arbitrary number(procedure)  
**NPU20348**  
ErCs(B)—Erythrocyte M<sup>e</sup> antigen; arb.num.(proc.) = ?

**Plasma—**  
**Erythrocyte M<sup>g</sup> antibody;**  
arbitrary concentration(20 °C; procedure)  
**NPU20729**  
P—Erythrocyte M<sup>g</sup> antibody; arb.c.(20 °C; proc.) = ?

**Plasma—**  
**Erythrocyte M<sup>g</sup> antibody;**  
arbitrary concentration(37 °C; procedure)  
**NPU20730**  
P—Erythrocyte M<sup>g</sup> antibody; arb.c.(37 °C; proc.) = ?

**Plasma—**  
**Erythrocyte M<sup>g</sup> antibody;**  
arbitrary substance concentration(20 °C; procedure)  
arbitrary unit/litre  
**NPU21181**  
P—Erythrocyte M<sup>g</sup> antibody; arb.subst.c.(20 °C; proc.) = ?  
arb.unit/l

**Plasma—**  
**Erythrocyte M<sup>g</sup> antibody;**  
arbitrary substance concentration(37 °C; procedure)  
arbitrary unit/litre  
**NPU21182**  
P—Erythrocyte M<sup>g</sup> antibody; arb.subst.c.(37 °C; proc.) = ?  
arb.unit/l

**Erythrocytes(Blood)—**  
**Erythrocyte M<sup>g</sup> antigen;**  
arbitrary number(procedure)  
**NPU20350**  
ErCs(B)—Erythrocyte M<sup>g</sup> antigen; arb.num.(proc.) = ?

**Plasma—**  
**Erythrocyte M<sup>v</sup> antibody;**  
arbitrary concentration(20 °C; procedure)  
**NPU20745**  
P—Erythrocyte M<sup>v</sup> antibody; arb.c.(20 °C; proc.) = ?

**Plasma—**  
**Erythrocyte M<sup>v</sup> antibody;**  
arbitrary concentration(37 °C; procedure)  
**NPU20746**  
P—Erythrocyte M<sup>v</sup> antibody; arb.c.(37 °C; proc.) = ?

**Plasma—**  
**Erythrocyte M<sup>v</sup> antibody;**  
arbitrary substance concentration(20 °C; procedure)  
arbitrary unit/litre  
**NPU21197**  
P—Erythrocyte M<sup>v</sup> antibody; arb.subst.c.(20 °C; proc.) = ?  
arb.unit/l

**Plasma—**  
**Erythrocyte M<sup>v</sup> antibody;**  
arbitrary substance concentration(37 °C; procedure)  
arbitrary unit/litre  
**NPU21198**  
P—Erythrocyte M<sup>v</sup> antibody; arb.subst.c.(37 °C; proc.) = ?  
arb.unit/l

**Erythrocytes(Blood)—**  
**Erythrocyte M<sup>v</sup> antigen;**  
arbitrary number(procedure)  
**NPU20358**  
ErCs(B)—Erythrocyte M<sup>v</sup> antigen; arb.num.(proc.) = ?

**Plasma—**  
**Erythrocyte MAR antibody;**  
**arbitrary concentration(20 °C; procedure)**  
**NPU20715**  
P—Erythrocyte MAR antibody; arb.c.(20 °C; proc.) = ?

**Plasma—**  
**Erythrocyte MAR antibody;**  
**arbitrary concentration(37 °C; procedure)**  
**NPU20716**  
P—Erythrocyte MAR antibody; arb.c.(37 °C; proc.) = ?

**Plasma—**  
**Erythrocyte MAR antibody;**  
**arbitrary substance concentration(20 °C; procedure)**  
**arbitrary unit/litre**  
**NPU21167**  
P—Erythrocyte MAR antibody; arb.subst.c.(20 °C; proc.) = ?  
arb.unit/l

**Plasma—**  
**Erythrocyte MAR antibody;**  
**arbitrary substance concentration(37 °C; procedure)**  
**arbitrary unit/litre**  
**NPU21168**  
P—Erythrocyte MAR antibody; arb.subst.c.(37 °C; proc.) = ?  
arb.unit/l

**Erythrocytes(Blood)—**  
**Erythrocyte MAR antigen;**  
**arbitrary number(procedure)**  
**NPU20343**  
ErCs(B)—Erythrocyte MAR antigen; arb.num.(proc.) = ?

**Plasma—**  
**Erythrocyte MARS antibody;**  
**arbitrary concentration(20 °C; procedure)**  
**NPU20717**  
P—Erythrocyte MARS antibody; arb.c.(20 °C; proc.) = ?

**Plasma—**  
**Erythrocyte MARS antibody;**  
**arbitrary concentration(37 °C; procedure)**  
**NPU20718**  
P—Erythrocyte MARS antibody; arb.c.(37 °C; proc.) = ?

**Plasma—**  
**Erythrocyte MARS antibody;**  
**arbitrary substance concentration(20 °C; procedure)**  
**arbitrary unit/litre**  
**NPU21169**  
P—Erythrocyte MARS antibody; arb.subst.c.(20 °C; proc.) = ?  
arb.unit/l

**Plasma—**  
**Erythrocyte MARS antibody;**  
**arbitrary substance concentration(37 °C; procedure)**  
**arbitrary unit/litre**  
**NPU21170**  
P—Erythrocyte MARS antibody; arb.subst.c.(37 °C; proc.) = ?  
arb.unit/l

**Erythrocytes(Blood)—**  
**Erythrocyte MARS antigen;**  
**arbitrary number(procedure)**  
**NPU20344**  
ErCs(B)—Erythrocyte MARS antigen; arb.num.(proc.) = ?

**Plasma—**  
**Erythrocyte McC<sup>a</sup> antibody;**  
**arbitrary concentration(20 °C; procedure)**  
**NPU20721**  
P—Erythrocyte McC<sup>a</sup> antibody; arb.c.(20 °C; proc.) = ?

**Plasma—**  
**Erythrocyte McC<sup>a</sup> antibody;**  
**arbitrary concentration(37 °C; procedure)**  
**NPU20722**  
P—Erythrocyte McC<sup>a</sup> antibody; arb.c.(37 °C; proc.) = ?

**Plasma—**  
**Erythrocyte McC<sup>a</sup> antibody;**  
**arbitrary substance concentration(20 °C; procedure)**  
**arbitrary unit/litre**  
**NPU21173**  
P—Erythrocyte McC<sup>a</sup> antibody; arb.subst.c.(20 °C; proc.) = ?  
arb.unit/l

**Plasma—**  
**Erythrocyte McC<sup>a</sup> antibody;**  
**arbitrary substance concentration(37 °C; procedure)**  
**arbitrary unit/litre**  
**NPU21174**  
P—Erythrocyte McC<sup>a</sup> antibody; arb.subst.c.(37 °C; proc.) = ?  
arb.unit/l

**Erythrocytes(Blood)—**  
**Erythrocyte McC<sup>a</sup> antigen;**  
**arbitrary number(procedure)**  
**NPU20346**  
ErCs(B)—Erythrocyte McC<sup>a</sup> antigen; arb.num.(proc.) = ?

**Plasma—**  
**Erythrocyte McC<sup>b</sup> antibody;**  
**arbitrary concentration(20 °C; procedure)**  
**NPU20723**  
P—Erythrocyte McC<sup>b</sup> antibody; arb.c.(20 °C; proc.) = ?

**Plasma—**  
**Erythrocyte McC<sup>b</sup> antibody;**  
**arbitrary concentration(37 °C; procedure)**  
**NPU20724**  
P—Erythrocyte McC<sup>b</sup> antibody; arb.c.(37 °C; proc.) = ?

**Plasma—**  
**Erythrocyte McC<sup>b</sup> antibody;**  
**arbitrary substance concentration(20 °C; procedure)**  
**arbitrary unit/litre**  
**NPU21175**  
P—Erythrocyte McC<sup>b</sup> antibody; arb.subst.c.(20 °C; proc.) = ?  
arb.unit/l

**Plasma—**  
**Erythrocyte McC<sup>b</sup> antibody;**  
**arbitrary substance concentration(37 °C; procedure)**  
**arbitrary unit/litre**  
**NPU21176**  
P—Erythrocyte McC<sup>b</sup> antibody; arb.subst.c.(37 °C; proc.) = ?  
arb.unit/l

**Erythrocytes(Blood)—**  
**Erythrocyte McC<sup>b</sup> antigen;**  
**arbitrary number(procedure)**  
**NPU20347**  
ErCs(B)—Erythrocyte McC<sup>b</sup> antigen; arb.num.(proc.) = ?

**Plasma—**  
**Erythrocyte MER2 antibody;**  
**arbitrary concentration(20 °C; procedure)**  
**NPU20727**  
P—Erythrocyte MER2 antibody; arb.c.(20 °C; proc.) = ?

**Plasma—**  
**Erythrocyte MER2 antibody;**  
**arbitrary concentration(37 °C; procedure)**  
**NPU20728**  
P—Erythrocyte MER2 antibody; arb.c.(37 °C; proc.) = ?

**Plasma—**  
**Erythrocyte MER2 antibody;**  
arbitrary substance concentration(20 °C; procedure)  
arbitrary unit/litre  
**NPU21179**  
P—Erythrocyte MER2 antibody; arb.subst.c.(20 °C; proc.) = ?  
arb.unit/l

**Plasma—**  
**Erythrocyte MER2 antibody;**  
arbitrary substance concentration(37 °C; procedure)  
arbitrary unit/litre  
**NPU21180**  
P—Erythrocyte MER2 antibody; arb.subst.c.(37 °C; proc.) = ?  
arb.unit/l

**Erythrocytes(Blood)—**  
**Erythrocyte MER2 antigen;**  
arbitrary number(procedure)  
**NPU20349**  
Ercs(B)—Erythrocyte MER2 antigen; arb.num.(proc.) = ?

**Plasma—**  
**Erythrocyte Mi<sup>a</sup> antibody;**  
arbitrary concentration(20 °C; procedure)  
**NPU20731**  
P—Erythrocyte Mi<sup>a</sup> antibody; arb.c.(20 °C; proc.) = ?

**Plasma—**  
**Erythrocyte Mi<sup>a</sup> antibody;**  
arbitrary concentration(37 °C; procedure)  
**NPU20732**  
P—Erythrocyte Mi<sup>a</sup> antibody; arb.c.(37 °C; proc.) = ?

**Plasma—**  
**Erythrocyte Mi<sup>a</sup> antibody;**  
arbitrary substance concentration(20 °C; procedure)  
arbitrary unit/litre  
**NPU21183**  
P—Erythrocyte Mi<sup>a</sup> antibody; arb.subst.c.(20 °C; proc.) = ?  
arb.unit/l

**Plasma—**  
**Erythrocyte Mi<sup>a</sup> antibody;**  
arbitrary substance concentration(37 °C; procedure)  
arbitrary unit/litre  
**NPU21184**  
P—Erythrocyte Mi<sup>a</sup> antibody; arb.subst.c.(37 °C; proc.) = ?  
arb.unit/l

**Erythrocytes(Blood)—**  
**Erythrocyte Mi<sup>a</sup> antigen;**  
arbitrary number(procedure)  
**NPU20351**  
Ercs(B)—Erythrocyte Mi<sup>a</sup> antigen; arb.num.(proc.) = ?

**Plasma—**  
**Erythrocyte MINY antibody;**  
arbitrary concentration(20 °C; procedure)  
**NPU20733**  
P—Erythrocyte MINY antibody; arb.c.(20 °C; proc.) = ?

**Plasma—**  
**Erythrocyte MINY antibody;**  
arbitrary concentration(37 °C; procedure)  
**NPU20734**  
P—Erythrocyte MINY antibody; arb.c.(37 °C; proc.) = ?

**Plasma—**  
**Erythrocyte MINY antibody;**  
arbitrary substance concentration(20 °C; procedure)  
arbitrary unit/litre  
**NPU21185**  
P—Erythrocyte MINY antibody; arb.subst.c.(20 °C; proc.) = ?  
arb.unit/l

**Plasma—**  
**Erythrocyte MINY antibody;**  
arbitrary substance concentration(37 °C; procedure)  
arbitrary unit/litre  
**NPU21186**  
P—Erythrocyte MINY antibody; arb.subst.c.(37 °C; proc.) = ?  
arb.unit/l

**Erythrocytes(Blood)—**  
**Erythrocyte MINY antigen;**  
arbitrary number(procedure)  
**NPU20352**  
Ercs(B)—Erythrocyte MINY antigen; arb.num.(proc.) = ?

**Plasma—**  
**Erythrocyte Mit antibody;**  
arbitrary concentration(20 °C; procedure)  
**NPU20735**  
P—Erythrocyte Mit antibody; arb.c.(20 °C; proc.) = ?

**Plasma—**  
**Erythrocyte Mit antibody;**  
arbitrary concentration(37 °C; procedure)  
**NPU20736**  
P—Erythrocyte Mit antibody; arb.c.(37 °C; proc.) = ?

**Plasma—**  
**Erythrocyte Mit antibody;**  
arbitrary substance concentration(20 °C; procedure)  
arbitrary unit/litre  
**NPU21187**  
P—Erythrocyte Mit antibody; arb.subst.c.(20 °C; proc.) = ?  
arb.unit/l

**Plasma—**  
**Erythrocyte Mit antibody;**  
arbitrary substance concentration(37 °C; procedure)  
arbitrary unit/litre  
**NPU21188**  
P—Erythrocyte Mit antibody; arb.subst.c.(37 °C; proc.) = ?  
arb.unit/l

**Erythrocytes(Blood)—**  
**Erythrocyte Mit antigen;**  
arbitrary number(procedure)  
**NPU20353**  
Ercs(B)—Erythrocyte Mit antigen; arb.num.(proc.) = ?

**Plasma—**  
**Erythrocyte Mo<sup>a</sup> antibody;**  
arbitrary concentration(20 °C; procedure)  
**NPU20737**  
P—Erythrocyte Mo<sup>a</sup> antibody; arb.c.(20 °C; proc.) = ?

**Plasma—**  
**Erythrocyte Mo<sup>a</sup> antibody;**  
arbitrary concentration(37 °C; procedure)  
**NPU20738**  
P—Erythrocyte Mo<sup>a</sup> antibody; arb.c.(37 °C; proc.) = ?

**Plasma—**  
**Erythrocyte Mo<sup>a</sup> antibody;**  
arbitrary substance concentration(20 °C; procedure)  
arbitrary unit/litre  
**NPU21189**  
P—Erythrocyte Mo<sup>a</sup> antibody; arb.subst.c.(20 °C; proc.) = ?  
arb.unit/l

**Plasma—**  
**Erythrocyte Mo<sup>a</sup> antibody;**  
arbitrary substance concentration(37 °C; procedure)  
arbitrary unit/litre  
**NPU21190**  
P—Erythrocyte Mo<sup>a</sup> antibody; arb.subst.c.(37 °C; proc.) = ?  
arb.unit/l

**Erythrocytes(Blood)—**  
**Erythrocyte Mo<sup>a</sup> antigen;**  
**arbitrary number(procedure)**  
**NPU20354**  
ErCs(B)—Erythrocyte Mo<sup>a</sup> antigen; arb.num.(proc.) = ?

**Plasma—**  
**Erythrocyte Mt<sup>a</sup> antibody;**  
**arbitrary concentration(20 °C; procedure)**  
**NPU20739**  
P—Erythrocyte Mt<sup>a</sup> antibody; arb.c.(20 °C; proc.) = ?

**Plasma—**  
**Erythrocyte Mt<sup>a</sup> antibody;**  
**arbitrary concentration(37 °C; procedure)**  
**NPU20740**  
P—Erythrocyte Mt<sup>a</sup> antibody; arb.c.(37 °C; proc.) = ?

**Plasma—**  
**Erythrocyte Mt<sup>a</sup> antibody;**  
**arbitrary substance concentration(20 °C; procedure)**  
**arbitrary unit/litre**  
**NPU21191**  
P—Erythrocyte Mt<sup>a</sup> antibody; arb.subst.c.(20 °C; proc.) = ?  
arb.unit/l

**Plasma—**  
**Erythrocyte Mt<sup>a</sup> antibody;**  
**arbitrary substance concentration(37 °C; procedure)**  
**arbitrary unit/litre**  
**NPU21192**  
P—Erythrocyte Mt<sup>a</sup> antibody; arb.subst.c.(37 °C; proc.) = ?  
arb.unit/l

**Erythrocytes(Blood)—**  
**Erythrocyte Mt<sup>a</sup> antigen;**  
**arbitrary number(procedure)**  
**NPU20355**  
ErCs(B)—Erythrocyte Mt<sup>a</sup> antigen; arb.num.(proc.) = ?

**Plasma—**  
**Erythrocyte Mur antibody;**  
**arbitrary concentration(20 °C; procedure)**  
**NPU20741**  
P—Erythrocyte Mur antibody; arb.c.(20 °C; proc.) = ?

**Plasma—**  
**Erythrocyte Mur antibody;**  
**arbitrary concentration(37 °C; procedure)**  
**NPU20742**  
P—Erythrocyte Mur antibody; arb.c.(37 °C; proc.) = ?

**Plasma—**  
**Erythrocyte Mur antibody;**  
**arbitrary substance concentration(20 °C; procedure)**  
**arbitrary unit/litre**  
**NPU21193**  
P—Erythrocyte Mur antibody; arb.subst.c.(20 °C; proc.) = ?  
arb.unit/l

**Plasma—**  
**Erythrocyte Mur antibody;**  
**arbitrary substance concentration(37 °C; procedure)**  
**arbitrary unit/litre**  
**NPU21194**  
P—Erythrocyte Mur antibody; arb.subst.c.(37 °C; proc.) = ?  
arb.unit/l

**Erythrocytes(Blood)—**  
**Erythrocyte Mur antigen;**  
**arbitrary number(procedure)**  
**NPU20356**  
ErCs(B)—Erythrocyte Mur antigen; arb.num.(proc.) = ?

**Plasma—**  
**Erythrocyte MUT antibody;**  
**arbitrary concentration(20 °C; procedure)**  
**NPU20743**  
P—Erythrocyte MUT antibody; arb.c.(20 °C; proc.) = ?

**Plasma—**  
**Erythrocyte MUT antibody;**  
**arbitrary concentration(37 °C; procedure)**  
**NPU20744**  
P—Erythrocyte MUT antibody; arb.c.(37 °C; proc.) = ?

**Plasma—**  
**Erythrocyte MUT antibody;**  
**arbitrary substance concentration(20 °C; procedure)**  
**arbitrary unit/litre**  
**NPU21195**  
P—Erythrocyte MUT antibody; arb.subst.c.(20 °C; proc.) = ?  
arb.unit/l

**Plasma—**  
**Erythrocyte MUT antibody;**  
**arbitrary substance concentration(37 °C; procedure)**  
**arbitrary unit/litre**  
**NPU21196**  
P—Erythrocyte MUT antibody; arb.subst.c.(37 °C; proc.) = ?  
arb.unit/l

**Erythrocytes(Blood)—**  
**Erythrocyte MUT antigen;**  
**arbitrary number(procedure)**  
**NPU20357**  
ErCs(B)—Erythrocyte MUT antigen; arb.num.(proc.) = ?

**Plasma—**  
**Erythrocyte N antibody;**  
**arbitrary concentration(20 °C; procedure)**  
**NPU20747**  
P—Erythrocyte N antibody; arb.c.(20 °C; proc.) = ?

**Plasma—**  
**Erythrocyte N antibody;**  
**arbitrary concentration(37 °C; procedure)**  
**NPU20748**  
P—Erythrocyte N antibody; arb.c.(37 °C; proc.) = ?

**Plasma—**  
**Erythrocyte N antibody;**  
**arbitrary substance concentration(20 °C; procedure)**  
**arbitrary unit/litre**  
**NPU21199**  
P—Erythrocyte N antibody; arb.subst.c.(20 °C; proc.) = ?  
arb.unit/l

**Plasma—**  
**Erythrocyte N antibody;**  
**arbitrary substance concentration(37 °C; procedure)**  
**arbitrary unit/litre**  
**NPU21200**  
P—Erythrocyte N antibody; arb.subst.c.(37 °C; proc.) = ?  
arb.unit/l

**Erythrocytes(Blood)—**  
**Erythrocyte N antigen;**  
**arbitrary number(procedure)**  
**NPU20359**  
ErCs(B)—Erythrocyte N antigen; arb.num.(proc.) = ?

**Plasma—**  
**Erythrocyte NFLD antibody;**  
**arbitrary concentration(20 °C; procedure)**  
**NPU20749**  
P—Erythrocyte NFLD antibody; arb.c.(20 °C; proc.) = ?

**Plasma—**  
**Erythrocyte NFLD antibody;**  
arbitrary concentration(37 °C; procedure)  
**NPU20750**  
P—Erythrocyte NFLD antibody; arb.c.(37 °C; proc.) = ?

**Plasma—**  
**Erythrocyte NFLD antibody;**  
arbitrary substance concentration(20 °C; procedure)  
arbitrary unit/litre  
**NPU21201**  
P—Erythrocyte NFLD antibody; arb.subst.c.(20 °C; proc.) = ?  
arb.unit/l

**Plasma—**  
**Erythrocyte NFLD antibody;**  
arbitrary substance concentration(37 °C; procedure)  
arbitrary unit/litre  
**NPU21202**  
P—Erythrocyte NFLD antibody; arb.subst.c.(37 °C; proc.) = ?  
arb.unit/l

**Erythrocytes(Blood)—**  
**Erythrocyte NFLD antigen;**  
arbitrary number(procedure)  
**NPU20360**  
Ercs(B)—Erythrocyte NFLD antigen; arb.num.(proc.) = ?

**Plasma—**  
**Erythrocyte Nob antibody;**  
arbitrary concentration(20 °C; procedure)  
**NPU20751**  
P—Erythrocyte Nob antibody; arb.c.(20 °C; proc.) = ?

**Plasma—**  
**Erythrocyte Nob antibody;**  
arbitrary concentration(37 °C; procedure)  
**NPU20752**  
P—Erythrocyte Nob antibody; arb.c.(37 °C; proc.) = ?

**Plasma—**  
**Erythrocyte Nob antibody;**  
arbitrary substance concentration(20 °C; procedure)  
arbitrary unit/litre  
**NPU21203**  
P—Erythrocyte Nob antibody; arb.subst.c.(20 °C; proc.) = ?  
arb.unit/l

**Plasma—**  
**Erythrocyte Nob antibody;**  
arbitrary substance concentration(37 °C; procedure)  
arbitrary unit/litre  
**NPU21204**  
P—Erythrocyte Nob antibody; arb.subst.c.(37 °C; proc.) = ?  
arb.unit/l

**Erythrocytes(Blood)—**  
**Erythrocyte Nob antigen;**  
arbitrary number(procedure)  
**NPU20361**  
Ercs(B)—Erythrocyte Nob antigen; arb.num.(proc.) = ?

**Plasma—**  
**Erythrocyte Nou antibody;**  
arbitrary concentration(20 °C; procedure)  
**NPU20753**  
P—Erythrocyte Nou antibody; arb.c.(20 °C; proc.) = ?

**Plasma—**  
**Erythrocyte Nou antibody;**  
arbitrary concentration(37 °C; procedure)  
**NPU20754**  
P—Erythrocyte Nou antibody; arb.c.(37 °C; proc.) = ?

**Plasma—**  
**Erythrocyte Nou antibody;**  
arbitrary substance concentration(20 °C; procedure)  
arbitrary unit/litre  
**NPU21205**  
P—Erythrocyte Nou antibody; arb.subst.c.(20 °C; proc.) = ?  
arb.unit/l

**Plasma—**  
**Erythrocyte Nou antibody;**  
arbitrary substance concentration(37 °C; procedure)  
arbitrary unit/litre  
**NPU21206**  
P—Erythrocyte Nou antibody; arb.subst.c.(37 °C; proc.) = ?  
arb.unit/l

**Erythrocytes(Blood)—**  
**Erythrocyte Nou antigen;**  
arbitrary number(procedure)  
**NPU20362**  
Ercs(B)—Erythrocyte Nou antigen; arb.num.(proc.) = ?

**Plasma—**  
**Erythrocyte Ny<sup>a</sup> antibody;**  
arbitrary concentration(20 °C; procedure)  
**NPU20755**  
P—Erythrocyte Ny<sup>a</sup> antibody; arb.c.(20 °C; proc.) = ?

**Plasma—**  
**Erythrocyte Ny<sup>a</sup> antibody;**  
arbitrary concentration(37 °C; procedure)  
**NPU20756**  
P—Erythrocyte Ny<sup>a</sup> antibody; arb.c.(37 °C; proc.) = ?

**Plasma—**  
**Erythrocyte Ny<sup>a</sup> antibody;**  
arbitrary substance concentration(20 °C; procedure)  
arbitrary unit/litre  
**NPU21207**  
P—Erythrocyte Ny<sup>a</sup> antibody; arb.subst.c.(20 °C; proc.) = ?  
arb.unit/l

**Plasma—**  
**Erythrocyte Ny<sup>a</sup> antibody;**  
arbitrary substance concentration(37 °C; procedure)  
arbitrary unit/litre  
**NPU21208**  
P—Erythrocyte Ny<sup>a</sup> antibody; arb.subst.c.(37 °C; proc.) = ?  
arb.unit/l

**Erythrocytes(Blood)—**  
**Erythrocyte Ny<sup>a</sup> antigen;**  
arbitrary number(procedure)  
**NPU20363**  
Ercs(B)—Erythrocyte Ny<sup>a</sup> antigen; arb.num.(proc.) = ?

**Plasma—**  
**Erythrocyte Ok<sup>a</sup> antibody;**  
arbitrary concentration(20 °C; procedure)  
**NPU20757**  
P—Erythrocyte Ok<sup>a</sup> antibody; arb.c.(20 °C; proc.) = ?

**Plasma—**  
**Erythrocyte Ok<sup>a</sup> antibody;**  
arbitrary concentration(37 °C; procedure)  
**NPU20758**  
P—Erythrocyte Ok<sup>a</sup> antibody; arb.c.(37 °C; proc.) = ?

**Plasma—**  
**Erythrocyte Ok<sup>a</sup> antibody;**  
arbitrary substance concentration(20 °C; procedure)  
arbitrary unit/litre  
**NPU21209**  
P—Erythrocyte Ok<sup>a</sup> antibody; arb.subst.c.(20 °C; proc.) = ?  
arb.unit/l

**Plasma—**  
**Erythrocyte Ok<sup>a</sup> antibody;**  
arbitrary substance concentration(37 °C; procedure)  
arbitrary unit/litre  
**NPU21210**  
P—Erythrocyte Ok<sup>a</sup> antibody; arb.subst.c.(37 °C; proc.) = ?  
arb.unit/l

**Erythrocytes(Blood)—**  
**Erythrocyte Ok<sup>a</sup> antigen;**  
arbitrary number(procedure)  
**NPU20364**  
ErCs(B)—Erythrocyte Ok<sup>a</sup> antigen; arb.num.(proc.) = ?

**Plasma—**  
**Erythrocyte Or antibody;**  
arbitrary concentration(20 °C; procedure)  
**NPU20759**  
P—Erythrocyte Or antibody; arb.c.(20 °C; proc.) = ?

**Plasma—**  
**Erythrocyte Or antibody;**  
arbitrary concentration(37 °C; procedure)  
**NPU20760**  
P—Erythrocyte Or antibody; arb.c.(37 °C; proc.) = ?

**Plasma—**  
**Erythrocyte Or antibody;**  
arbitrary substance concentration(20 °C; procedure)  
arbitrary unit/litre  
**NPU21211**  
P—Erythrocyte Or antibody; arb.subst.c.(20 °C; proc.) = ?  
arb.unit/l

**Plasma—**  
**Erythrocyte Or antibody;**  
arbitrary substance concentration(37 °C; procedure)  
arbitrary unit/litre  
**NPU21212**  
P—Erythrocyte Or antibody; arb.subst.c.(37 °C; proc.) = ?  
arb.unit/l

**Erythrocytes(Blood)—**  
**Erythrocyte Or antigen;**  
arbitrary number(procedure)  
**NPU20365**  
ErCs(B)—Erythrocyte Or antigen; arb.num.(proc.) = ?

**Plasma—**  
**Erythrocyte Os<sup>a</sup> antibody;**  
arbitrary concentration(20 °C; procedure)  
**NPU20761**  
P—Erythrocyte Os<sup>a</sup> antibody; arb.c.(20 °C; proc.) = ?

**Plasma—**  
**Erythrocyte Os<sup>a</sup> antibody;**  
arbitrary concentration(37 °C; procedure)  
**NPU20762**  
P—Erythrocyte Os<sup>a</sup> antibody; arb.c.(37 °C; proc.) = ?

**Plasma—**  
**Erythrocyte Os<sup>a</sup> antibody;**  
arbitrary substance concentration(20 °C; procedure)  
arbitrary unit/litre  
**NPU21213**  
P—Erythrocyte Os<sup>a</sup> antibody; arb.subst.c.(20 °C; proc.) = ?  
arb.unit/l

**Plasma—**  
**Erythrocyte Os<sup>a</sup> antibody;**  
arbitrary substance concentration(37 °C; procedure)  
arbitrary unit/litre  
**NPU21214**  
P—Erythrocyte Os<sup>a</sup> antibody; arb.subst.c.(37 °C; proc.) = ?  
arb.unit/l

**Erythrocytes(Blood)—**  
**Erythrocyte Os<sup>a</sup> antigen;**  
arbitrary number(procedure)  
**NPU20366**  
ErCs(B)—Erythrocyte Os<sup>a</sup> antigen; arb.num.(proc.) = ?

**Plasma—**  
**Erythrocyte P1 antibody;**  
arbitrary concentration(20 °C; procedure)  
**NPU20763**  
P—Erythrocyte P1 antibody; arb.c.(20 °C; proc.) = ?

**Plasma—**  
**Erythrocyte P1 antibody;**  
arbitrary concentration(37 °C; procedure)  
**NPU20764**  
P—Erythrocyte P1 antibody; arb.c.(37 °C; proc.) = ?

**Plasma—**  
**Erythrocyte P1 antibody;**  
arbitrary substance concentration(20 °C; procedure)  
arbitrary unit/litre  
**NPU21215**  
P—Erythrocyte P1 antibody; arb.subst.c.(20 °C; proc.) = ?  
arb.unit/l

**Plasma—**  
**Erythrocyte P1 antibody;**  
arbitrary substance concentration(37 °C; procedure)  
arbitrary unit/litre  
**NPU21216**  
P—Erythrocyte P1 antibody; arb.subst.c.(37 °C; proc.) = ?  
arb.unit/l

**Erythrocytes(Blood)—**  
**Erythrocyte P1 antigen;**  
arbitrary number(procedure)  
**NPU20367**  
ErCs(B)—Erythrocyte P1 antigen; arb.num.(proc.) = ?

**Plasma—**  
**Erythrocyte Rb<sup>a</sup> antibody;**  
arbitrary concentration(20 °C; procedure)  
**NPU20765**  
P—Erythrocyte Rb<sup>a</sup> antibody; arb.c.(20 °C; proc.) = ?

**Plasma—**  
**Erythrocyte Rb<sup>a</sup> antibody;**  
arbitrary concentration(37 °C; procedure)  
**NPU20766**  
P—Erythrocyte Rb<sup>a</sup> antibody; arb.c.(37 °C; proc.) = ?

**Plasma—**  
**Erythrocyte Rb<sup>a</sup> antibody;**  
arbitrary substance concentration(20 °C; procedure)  
arbitrary unit/litre  
**NPU21217**  
P—Erythrocyte Rb<sup>a</sup> antibody; arb.subst.c.(20 °C; proc.) = ?  
arb.unit/l

**Plasma—**  
**Erythrocyte Rb<sup>a</sup> antibody;**  
arbitrary substance concentration(37 °C; procedure)  
arbitrary unit/litre  
**NPU21218**  
P—Erythrocyte Rb<sup>a</sup> antibody; arb.subst.c.(37 °C; proc.) = ?  
arb.unit/l

**Erythrocytes(Blood)—**  
**Erythrocyte Rb<sup>a</sup> antigen;**  
arbitrary number(procedure)  
**NPU20368**  
ErCs(B)—Erythrocyte Rb<sup>a</sup> antigen; arb.num.(proc.) = ?

**Plasma—**  
**Erythrocyte Rg1 antibody;**  
**arbitrary concentration(20 °C; procedure)**  
**NPU20767**  
P—Erythrocyte Rg1 antibody; arb.c.(20 °C; proc.) = ?

**Plasma—**  
**Erythrocyte Rg1 antibody;**  
**arbitrary concentration(37 °C; procedure)**  
**NPU20768**  
P—Erythrocyte Rg1 antibody; arb.c.(37 °C; proc.) = ?

**Plasma—**  
**Erythrocyte Rg1 antibody;**  
**arbitrary substance concentration(20 °C; procedure)**  
**arbitrary unit/litre**  
**NPU21219**  
P—Erythrocyte Rg1 antibody; arb.subst.c.(20 °C; proc.) = ?  
arb.unit/l

**Plasma—**  
**Erythrocyte Rg1 antibody;**  
**arbitrary substance concentration(37 °C; procedure)**  
**arbitrary unit/litre**  
**NPU21220**  
P—Erythrocyte Rg1 antibody; arb.subst.c.(37 °C; proc.) = ?  
arb.unit/l

**Erythrocytes(Blood)—**  
**Erythrocyte Rg1 antigen;**  
**arbitrary number(procedure)**  
**NPU20369**  
ErCs(B)—Erythrocyte Rg1 antigen; arb.num.(proc.) = ?

**Plasma—**  
**Erythrocyte Rg2 antibody;**  
**arbitrary concentration(20 °C; procedure)**  
**NPU20769**  
P—Erythrocyte Rg2 antibody; arb.c.(20 °C; proc.) = ?

**Plasma—**  
**Erythrocyte Rg2 antibody;**  
**arbitrary concentration(37 °C; procedure)**  
**NPU20770**  
P—Erythrocyte Rg2 antibody; arb.c.(37 °C; proc.) = ?

**Plasma—**  
**Erythrocyte Rg2 antibody;**  
**arbitrary substance concentration(20 °C; procedure)**  
**arbitrary unit/litre**  
**NPU21221**  
P—Erythrocyte Rg2 antibody; arb.subst.c.(20 °C; proc.) = ?  
arb.unit/l

**Plasma—**  
**Erythrocyte Rg2 antibody;**  
**arbitrary substance concentration(37 °C; procedure)**  
**arbitrary unit/litre**  
**NPU21222**  
P—Erythrocyte Rg2 antibody; arb.subst.c.(37 °C; proc.) = ?  
arb.unit/l

**Erythrocytes(Blood)—**  
**Erythrocyte Rg2 antigen;**  
**arbitrary number(procedure)**  
**NPU20370**  
ErCs(B)—Erythrocyte Rg2 antigen; arb.num.(proc.) = ?

**Plasma—**  
**Erythrocyte Rh29 antibody;**  
**arbitrary concentration(20 °C; procedure)**  
**NPU20771**  
P—Erythrocyte Rh29 antibody; arb.c.(20 °C; proc.) = ?

**Plasma—**  
**Erythrocyte Rh29 antibody;**  
**arbitrary concentration(37 °C; procedure)**  
**NPU20772**  
P—Erythrocyte Rh29 antibody; arb.c.(37 °C; proc.) = ?

**Plasma—**  
**Erythrocyte Rh29 antibody;**  
**arbitrary substance concentration(20 °C; procedure)**  
**arbitrary unit/litre**  
**NPU21223**  
P—Erythrocyte Rh29 antibody; arb.subst.c.(20 °C; proc.) = ?  
arb.unit/l

**Plasma—**  
**Erythrocyte Rh29 antibody;**  
**arbitrary substance concentration(37 °C; procedure)**  
**arbitrary unit/litre**  
**NPU21224**  
P—Erythrocyte Rh29 antibody; arb.subst.c.(37 °C; proc.) = ?  
arb.unit/l

**Erythrocytes(Blood)—**  
**Erythrocyte Rh29 antigen;**  
**arbitrary number(procedure)**  
**NPU20371**  
ErCs(B)—Erythrocyte Rh29 antigen; arb.num.(proc.) = ?

**Plasma—**  
**Erythrocyte Rh32 antibody;**  
**arbitrary concentration(20 °C; procedure)**  
**NPU20773**  
P—Erythrocyte Rh32 antibody; arb.c.(20 °C; proc.) = ?

**Plasma—**  
**Erythrocyte Rh32 antibody;**  
**arbitrary concentration(37 °C; procedure)**  
**NPU20774**  
P—Erythrocyte Rh32 antibody; arb.c.(37 °C; proc.) = ?

**Plasma—**  
**Erythrocyte Rh32 antibody;**  
**arbitrary substance concentration(20 °C; procedure)**  
**arbitrary unit/litre**  
**NPU21225**  
P—Erythrocyte Rh32 antibody; arb.subst.c.(20 °C; proc.) = ?  
arb.unit/l

**Plasma—**  
**Erythrocyte Rh32 antibody;**  
**arbitrary substance concentration(37 °C; procedure)**  
**arbitrary unit/litre**  
**NPU21226**  
P—Erythrocyte Rh32 antibody; arb.subst.c.(37 °C; proc.) = ?  
arb.unit/l

**Erythrocytes(Blood)—**  
**Erythrocyte Rh32 antigen;**  
**arbitrary number(procedure)**  
**NPU20372**  
ErCs(B)—Erythrocyte Rh32 antigen; arb.num.(proc.) = ?

**Plasma—**  
**Erythrocyte Rh33 antibody;**  
**arbitrary concentration(20 °C; procedure)**  
**NPU20775**  
P—Erythrocyte Rh33 antibody; arb.c.(20 °C; proc.) = ?

**Plasma—**  
**Erythrocyte Rh33 antibody;**  
**arbitrary concentration(37 °C; procedure)**  
**NPU20776**  
P—Erythrocyte Rh33 antibody; arb.c.(37 °C; proc.) = ?

**Plasma—**  
**Erythrocyte Rh33 antibody;**  
arbitrary substance concentration(20 °C; procedure)  
arbitrary unit/litre  
**NPU21227**  
P—Erythrocyte Rh33 antibody; arb.subst.c.(20 °C; proc.) = ?  
arb.unit/l

**Plasma—**  
**Erythrocyte Rh33 antibody;**  
arbitrary substance concentration(37 °C; procedure)  
arbitrary unit/litre  
**NPU21228**  
P—Erythrocyte Rh33 antibody; arb.subst.c.(37 °C; proc.) = ?  
arb.unit/l

**Erythrocytes(Blood)—**  
**Erythrocyte Rh33 antigen;**  
arbitrary number(procedure)  
**NPU20373**  
Ercs(B)—Erythrocyte Rh33 antigen; arb.num.(proc.) = ?

**Plasma—**  
**Erythrocyte Rh35 antibody;**  
arbitrary concentration(20 °C; procedure)  
**NPU20777**  
P—Erythrocyte Rh35 antibody; arb.c.(20 °C; proc.) = ?

**Plasma—**  
**Erythrocyte Rh35 antibody;**  
arbitrary concentration(37 °C; procedure)  
**NPU20778**  
P—Erythrocyte Rh35 antibody; arb.c.(37 °C; proc.) = ?

**Plasma—**  
**Erythrocyte Rh35 antibody;**  
arbitrary substance concentration(20 °C; procedure)  
arbitrary unit/litre  
**NPU21229**  
P—Erythrocyte Rh35 antibody; arb.subst.c.(20 °C; proc.) = ?  
arb.unit/l

**Plasma—**  
**Erythrocyte Rh35 antibody;**  
arbitrary substance concentration(37 °C; procedure)  
arbitrary unit/litre  
**NPU21230**  
P—Erythrocyte Rh35 antibody; arb.subst.c.(37 °C; proc.) = ?  
arb.unit/l

**Erythrocytes(Blood)—**  
**Erythrocyte Rh35 antigen;**  
arbitrary number(procedure)  
**NPU20374**  
Ercs(B)—Erythrocyte Rh35 antigen; arb.num.(proc.) = ?

**Plasma—**  
**Erythrocyte Rh39 antibody;**  
arbitrary concentration(20 °C; procedure)  
**NPU20779**  
P—Erythrocyte Rh39 antibody; arb.c.(20 °C; proc.) = ?

**Plasma—**  
**Erythrocyte Rh39 antibody;**  
arbitrary concentration(37 °C; procedure)  
**NPU20780**  
P—Erythrocyte Rh39 antibody; arb.c.(37 °C; proc.) = ?

**Plasma—**  
**Erythrocyte Rh39 antibody;**  
arbitrary substance concentration(20 °C; procedure)  
arbitrary unit/litre  
**NPU21231**  
P—Erythrocyte Rh39 antibody; arb.subst.c.(20 °C; proc.) = ?  
arb.unit/l

**Plasma—**  
**Erythrocyte Rh39 antibody;**  
arbitrary substance concentration(37 °C; procedure)  
arbitrary unit/litre  
**NPU21232**  
P—Erythrocyte Rh39 antibody; arb.subst.c.(37 °C; proc.) = ?  
arb.unit/l

**Erythrocytes(Blood)—**  
**Erythrocyte Rh39 antigen;**  
arbitrary number(procedure)  
**NPU20375**  
Ercs(B)—Erythrocyte Rh39 antigen; arb.num.(proc.) = ?

**Plasma—**  
**Erythrocyte Rh41 antibody;**  
arbitrary concentration(20 °C; procedure)  
**NPU20781**  
P—Erythrocyte Rh41 antibody; arb.c.(20 °C; proc.) = ?

**Plasma—**  
**Erythrocyte Rh41 antibody;**  
arbitrary concentration(37 °C; procedure)  
**NPU20782**  
P—Erythrocyte Rh41 antibody; arb.c.(37 °C; proc.) = ?

**Plasma—**  
**Erythrocyte Rh41 antibody;**  
arbitrary substance concentration(20 °C; procedure)  
arbitrary unit/litre  
**NPU21233**  
P—Erythrocyte Rh41 antibody; arb.subst.c.(20 °C; proc.) = ?  
arb.unit/l

**Plasma—**  
**Erythrocyte Rh41 antibody;**  
arbitrary substance concentration(37 °C; procedure)  
arbitrary unit/litre  
**NPU21234**  
P—Erythrocyte Rh41 antibody; arb.subst.c.(37 °C; proc.) = ?  
arb.unit/l

**Erythrocytes(Blood)—**  
**Erythrocyte Rh41 antigen;**  
arbitrary number(procedure)  
**NPU20376**  
Ercs(B)—Erythrocyte Rh41 antigen; arb.num.(proc.) = ?

**Plasma—**  
**Erythrocyte Rh42 antibody;**  
arbitrary concentration(20 °C; procedure)  
**NPU20783**  
P—Erythrocyte Rh42 antibody; arb.c.(20 °C; proc.) = ?

**Plasma—**  
**Erythrocyte Rh42 antibody;**  
arbitrary concentration(37 °C; procedure)  
**NPU20784**  
P—Erythrocyte Rh42 antibody; arb.c.(37 °C; proc.) = ?

**Plasma—**  
**Erythrocyte Rh42 antibody;**  
arbitrary substance concentration(20 °C; procedure)  
arbitrary unit/litre  
**NPU21235**  
P—Erythrocyte Rh42 antibody; arb.subst.c.(20 °C; proc.) = ?  
arb.unit/l

**Plasma—**  
**Erythrocyte Rh42 antibody;**  
arbitrary substance concentration(37 °C; procedure)  
arbitrary unit/litre  
**NPU21236**  
P—Erythrocyte Rh42 antibody; arb.subst.c.(37 °C; proc.) = ?  
arb.unit/l

**Erythrocytes(Blood)—**  
**Erythrocyte Rh42 antigen;**  
**arbitrary number(procedure)**  
**NPU20377**  
ErCs(B)—Erythrocyte Rh42 antigen; arb.num.(proc.) = ?

**Plasma—**  
**Erythrocyte Ri<sup>a</sup> antibody;**  
**arbitrary concentration(20 °C; procedure)**  
**NPU20785**  
P—Erythrocyte Ri<sup>a</sup> antibody; arb.c.(20 °C; proc.) = ?

**Plasma—**  
**Erythrocyte Ri<sup>a</sup> antibody;**  
**arbitrary concentration(37 °C; procedure)**  
**NPU20786**  
P—Erythrocyte Ri<sup>a</sup> antibody; arb.c.(37 °C; proc.) = ?

**Plasma—**  
**Erythrocyte Ri<sup>a</sup> antibody;**  
**arbitrary substance concentration(20 °C; procedure)**  
**arbitrary unit/litre**  
**NPU21237**  
P—Erythrocyte Ri<sup>a</sup> antibody; arb.subst.c.(20 °C; proc.) = ?  
arb.unit/l

**Plasma—**  
**Erythrocyte Ri<sup>a</sup> antibody;**  
**arbitrary substance concentration(37 °C; procedure)**  
**arbitrary unit/litre**  
**NPU21238**  
P—Erythrocyte Ri<sup>a</sup> antibody; arb.subst.c.(37 °C; proc.) = ?  
arb.unit/l

**Erythrocytes(Blood)—**  
**Erythrocyte Ri<sup>a</sup> antigen;**  
**arbitrary number(procedure)**  
**NPU20378**  
ErCs(B)—Erythrocyte Ri<sup>a</sup> antigen; arb.num.(proc.) = ?

**Plasma—**  
**Erythrocyte Riv antibody;**  
**arbitrary concentration(20 °C; procedure)**  
**NPU20787**  
P—Erythrocyte Riv antibody; arb.c.(20 °C; proc.) = ?

**Plasma—**  
**Erythrocyte Riv antibody;**  
**arbitrary concentration(37 °C; procedure)**  
**NPU20788**  
P—Erythrocyte Riv antibody; arb.c.(37 °C; proc.) = ?

**Plasma—**  
**Erythrocyte Riv antibody;**  
**arbitrary substance concentration(20 °C; procedure)**  
**arbitrary unit/litre**  
**NPU21239**  
P—Erythrocyte Riv antibody; arb.subst.c.(20 °C; proc.) = ?  
arb.unit/l

**Plasma—**  
**Erythrocyte Riv antibody;**  
**arbitrary substance concentration(37 °C; procedure)**  
**arbitrary unit/litre**  
**NPU21240**  
P—Erythrocyte Riv antibody; arb.subst.c.(37 °C; proc.) = ?  
arb.unit/l

**Erythrocytes(Blood)—**  
**Erythrocyte Riv antigen;**  
**arbitrary number(procedure)**  
**NPU20379**  
ErCs(B)—Erythrocyte Riv antigen; arb.num.(proc.) = ?

**Plasma—**  
**Erythrocyte S antibody;**  
**arbitrary concentration(20 °C; procedure)**  
**NPU20789**  
P—Erythrocyte S antibody; arb.c.(20 °C; proc.) = ?

**Plasma—**  
**Erythrocyte s antibody;**  
**arbitrary concentration(20 °C; procedure)**  
**NPU20790**  
P—Erythrocyte s antibody; arb.c.(20 °C; proc.) = ?

**Plasma—**  
**Erythrocyte S antibody;**  
**arbitrary concentration(37 °C; procedure)**  
**NPU20791**  
P—Erythrocyte S antibody; arb.c.(37 °C; proc.) = ?

**Plasma—**  
**Erythrocyte s antibody;**  
**arbitrary concentration(37 °C; procedure)**  
**NPU20792**  
P—Erythrocyte s antibody; arb.c.(37 °C; proc.) = ?

**Plasma—**  
**Erythrocyte S antibody;**  
**arbitrary substance concentration(20 °C; procedure)**  
**arbitrary unit/litre**  
**NPU21241**  
P—Erythrocyte S antibody; arb.subst.c.(20 °C; proc.) = ?  
arb.unit/l

**Plasma—**  
**Erythrocyte s antibody;**  
**arbitrary substance concentration(20 °C; procedure)**  
**arbitrary unit/litre**  
**NPU21242**  
P—Erythrocyte s antibody; arb.subst.c.(20 °C; proc.) = ?  
arb.unit/l

**Plasma—**  
**Erythrocyte S antibody;**  
**arbitrary substance concentration(37 °C; procedure)**  
**arbitrary unit/litre**  
**NPU21243**  
P—Erythrocyte S antibody; arb.subst.c.(37 °C; proc.) = ?  
arb.unit/l

**Plasma—**  
**Erythrocyte s antibody;**  
**arbitrary substance concentration(37 °C; procedure)**  
**arbitrary unit/litre**  
**NPU21244**  
P—Erythrocyte s antibody; arb.subst.c.(37 °C; proc.) = ?  
arb.unit/l

**Erythrocytes(Blood)—**  
**Erythrocyte S antigen;**  
**arbitrary number(procedure)**  
**NPU20380**  
ErCs(B)—Erythrocyte S antigen; arb.num.(proc.) = ?

**Erythrocytes(Blood)—**  
**Erythrocyte s antigen;**  
**arbitrary number(procedure)**  
**NPU20381**  
ErCs(B)—Erythrocyte s antigen; arb.num.(proc.) = ?

**Plasma—**  
**Erythrocyte s<sup>D</sup> antibody;**  
**arbitrary concentration(20 °C; procedure)**  
**NPU20801**  
P—Erythrocyte s<sup>D</sup> antibody; arb.c.(20 °C; proc.) = ?

**Plasma—**  
**Erythrocyte s<sup>D</sup> antibody;**  
arbitrary concentration(37 °C; procedure)  
**NPU20802**  
P—Erythrocyte s<sup>D</sup> antibody; arb.c.(37 °C; proc.) = ?

**Plasma—**  
**Erythrocyte s<sup>D</sup> antibody;**  
arbitrary substance concentration(20 °C; procedure)  
arbitrary unit/litre  
**NPU21253**  
P—Erythrocyte s<sup>D</sup> antibody; arb.subst.c.(20 °C; proc.) = ?  
arb.unit/l

**Plasma—**  
**Erythrocyte s<sup>D</sup> antibody;**  
arbitrary substance concentration(37 °C; procedure)  
arbitrary unit/litre  
**NPU21254**  
P—Erythrocyte s<sup>D</sup> antibody; arb.subst.c.(37 °C; proc.) = ?  
arb.unit/l

**Erythrocytes(Blood)—**  
**Erythrocyte s<sup>D</sup> antigen;**  
arbitrary number(procedure)  
**NPU20386**  
ErCs(B)—Erythrocyte s<sup>D</sup> antigen; arb.num.(proc.) = ?

**Plasma—**  
**Erythrocyte SAT antibody;**  
arbitrary concentration(20 °C; procedure)  
**NPU20793**  
P—Erythrocyte SAT antibody; arb.c.(20 °C; proc.) = ?

**Plasma—**  
**Erythrocyte SAT antibody;**  
arbitrary concentration(37 °C; procedure)  
**NPU20794**  
P—Erythrocyte SAT antibody; arb.c.(37 °C; proc.) = ?

**Plasma—**  
**Erythrocyte SAT antibody;**  
arbitrary substance concentration(20 °C; procedure)  
arbitrary unit/litre  
**NPU21245**  
P—Erythrocyte SAT antibody; arb.subst.c.(20 °C; proc.) = ?  
arb.unit/l

**Plasma—**  
**Erythrocyte SAT antibody;**  
arbitrary substance concentration(37 °C; procedure)  
arbitrary unit/litre  
**NPU21246**  
P—Erythrocyte SAT antibody; arb.subst.c.(37 °C; proc.) = ?  
arb.unit/l

**Erythrocytes(Blood)—**  
**Erythrocyte SAT antigen;**  
arbitrary number(procedure)  
**NPU20382**  
ErCs(B)—Erythrocyte SAT antigen; arb.num.(proc.) = ?

**Plasma—**  
**Erythrocyte Sc1 antibody;**  
arbitrary concentration(20 °C; procedure)  
**NPU20795**  
P—Erythrocyte Sc1 antibody; arb.c.(20 °C; proc.) = ?

**Plasma—**  
**Erythrocyte Sc1 antibody;**  
arbitrary concentration(37 °C; procedure)  
**NPU20796**  
P—Erythrocyte Sc1 antibody; arb.c.(37 °C; proc.) = ?

**Plasma—**  
**Erythrocyte Sc1 antibody;**  
arbitrary substance concentration(20 °C; procedure)  
arbitrary unit/litre  
**NPU21247**  
P—Erythrocyte Sc1 antibody; arb.subst.c.(20 °C; proc.) = ?  
arb.unit/l

**Plasma—**  
**Erythrocyte Sc1 antibody;**  
arbitrary substance concentration(37 °C; procedure)  
arbitrary unit/litre  
**NPU21248**  
P—Erythrocyte Sc1 antibody; arb.subst.c.(37 °C; proc.) = ?  
arb.unit/l

**Erythrocytes(Blood)—**  
**Erythrocyte Sc1 antigen;**  
arbitrary number(procedure)  
**NPU20383**  
ErCs(B)—Erythrocyte Sc1 antigen; arb.num.(proc.) = ?

**Plasma—**  
**Erythrocyte Sc2 antibody;**  
arbitrary concentration(20 °C; procedure)  
**NPU20797**  
P—Erythrocyte Sc2 antibody; arb.c.(20 °C; proc.) = ?

**Plasma—**  
**Erythrocyte Sc2 antibody;**  
arbitrary concentration(37 °C; procedure)  
**NPU20798**  
P—Erythrocyte Sc2 antibody; arb.c.(37 °C; proc.) = ?

**Plasma—**  
**Erythrocyte Sc2 antibody;**  
arbitrary substance concentration(20 °C; procedure)  
arbitrary unit/litre  
**NPU21249**  
P—Erythrocyte Sc2 antibody; arb.subst.c.(20 °C; proc.) = ?  
arb.unit/l

**Plasma—**  
**Erythrocyte Sc2 antibody;**  
arbitrary substance concentration(37 °C; procedure)  
arbitrary unit/litre  
**NPU21250**  
P—Erythrocyte Sc2 antibody; arb.subst.c.(37 °C; proc.) = ?  
arb.unit/l

**Erythrocytes(Blood)—**  
**Erythrocyte Sc2 antigen;**  
arbitrary number(procedure)  
**NPU20384**  
ErCs(B)—Erythrocyte Sc2 antigen; arb.num.(proc.) = ?

**Plasma—**  
**Erythrocyte Sc3 antibody;**  
arbitrary concentration(20 °C; procedure)  
**NPU20799**  
P—Erythrocyte Sc3 antibody; arb.c.(20 °C; proc.) = ?

**Plasma—**  
**Erythrocyte Sc3 antibody;**  
arbitrary concentration(37 °C; procedure)  
**NPU20800**  
P—Erythrocyte Sc3 antibody; arb.c.(37 °C; proc.) = ?

**Plasma—**  
**Erythrocyte Sc3 antibody;**  
arbitrary substance concentration(20 °C; procedure)  
arbitrary unit/litre  
**NPU21251**  
P—Erythrocyte Sc3 antibody; arb.subst.c.(20 °C; proc.) = ?  
arb.unit/l

**Plasma—**  
**Erythrocyte Sc3 antibody;**  
arbitrary substance concentration(37 °C; procedure)  
arbitrary unit/litre  
**NPU21252**  
P—Erythrocyte Sc3 antibody; arb.subst.c.(37 °C; proc.) = ?  
arb.unit/l

**Erythrocytes(Blood)—**  
**Erythrocyte Sc3 antigen;**  
arbitrary number(procedure)  
**NPU20385**  
ErCs(B)—Erythrocyte Sc3 antigen; arb.num.(proc.) = ?

**Plasma—**  
**Erythrocyte Sec antibody;**  
arbitrary concentration(20 °C; procedure)  
**NPU20803**  
P—Erythrocyte Sec antibody; arb.c.(20 °C; proc.) = ?

**Plasma—**  
**Erythrocyte Sec antibody;**  
arbitrary concentration(37 °C; procedure)  
**NPU20804**  
P—Erythrocyte Sec antibody; arb.c.(37 °C; proc.) = ?

**Plasma—**  
**Erythrocyte Sec antibody;**  
arbitrary substance concentration(20 °C; procedure)  
arbitrary unit/litre  
**NPU21255**  
P—Erythrocyte Sec antibody; arb.subst.c.(20 °C; proc.) = ?  
arb.unit/l

**Plasma—**  
**Erythrocyte Sec antibody;**  
arbitrary substance concentration(37 °C; procedure)  
arbitrary unit/litre  
**NPU21256**  
P—Erythrocyte Sec antibody; arb.subst.c.(37 °C; proc.) = ?  
arb.unit/l

**Erythrocytes(Blood)—**  
**Erythrocyte Sec antigen;**  
arbitrary number(procedure)  
**NPU20387**  
ErCs(B)—Erythrocyte Sec antigen; arb.num.(proc.) = ?

**Plasma—**  
**Erythrocyte Si<sup>a</sup> antibody;**  
arbitrary concentration(20 °C; procedure)  
**NPU20805**  
P—Erythrocyte Si<sup>a</sup> antibody; arb.c.(20 °C; proc.) = ?

**Plasma—**  
**Erythrocyte Si<sup>a</sup> antibody;**  
arbitrary concentration(37 °C; procedure)  
**NPU20806**  
P—Erythrocyte Si<sup>a</sup> antibody; arb.c.(37 °C; proc.) = ?

**Plasma—**  
**Erythrocyte Si<sup>a</sup> antibody;**  
arbitrary substance concentration(20 °C; procedure)  
arbitrary unit/litre  
**NPU21257**  
P—Erythrocyte Si<sup>a</sup> antibody; arb.subst.c.(20 °C; proc.) = ?  
arb.unit/l

**Plasma—**  
**Erythrocyte Si<sup>a</sup> antibody;**  
arbitrary substance concentration(37 °C; procedure)  
arbitrary unit/litre  
**NPU21258**  
P—Erythrocyte Si<sup>a</sup> antibody; arb.subst.c.(37 °C; proc.) = ?  
arb.unit/l

**Erythrocytes(Blood)—**  
**Erythrocyte Si<sup>a</sup> antigen;**  
arbitrary number(procedure)  
**NPU20388**  
ErCs(B)—Erythrocyte Si<sup>a</sup> antigen; arb.num.(proc.) = ?

**Plasma—**  
**Erythrocyte St<sup>a</sup> antibody;**  
arbitrary concentration(20 °C; procedure)  
**NPU20807**  
P—Erythrocyte St<sup>a</sup> antibody; arb.c.(20 °C; proc.) = ?

**Plasma—**  
**Erythrocyte St<sup>a</sup> antibody;**  
arbitrary concentration(37 °C; procedure)  
**NPU20808**  
P—Erythrocyte St<sup>a</sup> antibody; arb.c.(37 °C; proc.) = ?

**Plasma—**  
**Erythrocyte St<sup>a</sup> antibody;**  
arbitrary substance concentration(20 °C; procedure)  
arbitrary unit/litre  
**NPU21259**  
P—Erythrocyte St<sup>a</sup> antibody; arb.subst.c.(20 °C; proc.) = ?  
arb.unit/l

**Plasma—**  
**Erythrocyte St<sup>a</sup> antibody;**  
arbitrary substance concentration(37 °C; procedure)  
arbitrary unit/litre  
**NPU21260**  
P—Erythrocyte St<sup>a</sup> antibody; arb.subst.c.(37 °C; proc.) = ?  
arb.unit/l

**Erythrocytes(Blood)—**  
**Erythrocyte St<sup>a</sup> antigen;**  
arbitrary number(procedure)  
**NPU20389**  
ErCs(B)—Erythrocyte St<sup>a</sup> antigen; arb.num.(proc.) = ?

**Plasma—**  
**Erythrocyte STEM antibody;**  
arbitrary concentration(20 °C; procedure)  
**NPU20809**  
P—Erythrocyte STEM antibody; arb.c.(20 °C; proc.) = ?

**Plasma—**  
**Erythrocyte STEM antibody;**  
arbitrary concentration(37 °C; procedure)  
**NPU20810**  
P—Erythrocyte STEM antibody; arb.c.(37 °C; proc.) = ?

**Plasma—**  
**Erythrocyte STEM antibody;**  
arbitrary substance concentration(20 °C; procedure)  
arbitrary unit/litre  
**NPU21261**  
P—Erythrocyte STEM antibody; arb.subst.c.(20 °C; proc.) = ?  
arb.unit/l

**Plasma—**  
**Erythrocyte STEM antibody;**  
arbitrary substance concentration(37 °C; procedure)  
arbitrary unit/litre  
**NPU21262**  
P—Erythrocyte STEM antibody; arb.subst.c.(37 °C; proc.) = ?  
arb.unit/l

**Erythrocytes(Blood)—**  
**Erythrocyte STEM antigen;**  
arbitrary number(procedure)  
**NPU20390**  
ErCs(B)—Erythrocyte STEM antigen; arb.num.(proc.) = ?

**Plasma—**  
**Erythrocyte Sw<sup>a</sup> antibody;**  
 arbitrary concentration(20 °C; procedure)  
 NPU20813  
 P—Erythrocyte Sw<sup>a</sup> antibody; arb.c.(20 °C; proc.) = ?

**Plasma—**  
**Erythrocyte Sw<sup>a</sup> antibody;**  
 arbitrary concentration(37 °C; procedure)  
 NPU20814  
 P—Erythrocyte Sw<sup>a</sup> antibody; arb.c.(37 °C; proc.) = ?

**Plasma—**  
**Erythrocyte Sw<sup>a</sup> antibody;**  
 arbitrary substance concentration(20 °C; procedure)  
 arbitrary unit/litre  
 NPU21265  
 P—Erythrocyte Sw<sup>a</sup> antibody; arb.subst.c.(20 °C; proc.) = ?  
 arb.unit/l

**Plasma—**  
**Erythrocyte Sw<sup>a</sup> antibody;**  
 arbitrary substance concentration(37 °C; procedure)  
 arbitrary unit/litre  
 NPU21266  
 P—Erythrocyte Sw<sup>a</sup> antibody; arb.subst.c.(37 °C; proc.) = ?  
 arb.unit/l

**Erythrocytes(Blood)—**  
**Erythrocyte Sw<sup>a</sup> antigen;**  
 arbitrary number(procedure)  
 NPU20392  
 Ercs(B)—Erythrocyte Sw<sup>a</sup> antigen; arb.num.(proc.) = ?

**Plasma—**  
**Erythrocyte SW1 antibody;**  
 arbitrary concentration(20 °C; procedure)  
 NPU20811  
 P—Erythrocyte SW1 antibody; arb.c.(20 °C; proc.) = ?

**Plasma—**  
**Erythrocyte SW1 antibody;**  
 arbitrary concentration(37 °C; procedure)  
 NPU20812  
 P—Erythrocyte SW1 antibody; arb.c.(37 °C; proc.) = ?

**Plasma—**  
**Erythrocyte SW1 antibody;**  
 arbitrary substance concentration(20 °C; procedure)  
 arbitrary unit/litre  
 NPU21263  
 P—Erythrocyte SW1 antibody; arb.subst.c.(20 °C; proc.) = ?  
 arb.unit/l

**Plasma—**  
**Erythrocyte SW1 antibody;**  
 arbitrary substance concentration(37 °C; procedure)  
 arbitrary unit/litre  
 NPU21264  
 P—Erythrocyte SW1 antibody; arb.subst.c.(37 °C; proc.) = ?  
 arb.unit/l

**Erythrocytes(Blood)—**  
**Erythrocyte SW1 antigen;**  
 arbitrary number(procedure)  
 NPU20391  
 Ercs(B)—Erythrocyte SW1 antigen; arb.num.(proc.) = ?

**Plasma—**  
**Erythrocyte Tar antibody;**  
 arbitrary concentration(20 °C; procedure)  
 NPU20815  
 P—Erythrocyte Tar antibody; arb.c.(20 °C; proc.) = ?

**Plasma—**  
**Erythrocyte Tar antibody;**  
 arbitrary concentration(37 °C; procedure)  
 NPU20816  
 P—Erythrocyte Tar antibody; arb.c.(37 °C; proc.) = ?

**Plasma—**  
**Erythrocyte Tar antibody;**  
 arbitrary substance concentration(20 °C; procedure)  
 arbitrary unit/litre  
 NPU21267  
 P—Erythrocyte Tar antibody; arb.subst.c.(20 °C; proc.) = ?  
 arb.unit/l

**Plasma—**  
**Erythrocyte Tar antibody;**  
 arbitrary substance concentration(37 °C; procedure)  
 arbitrary unit/litre  
 NPU21268  
 P—Erythrocyte Tar antibody; arb.subst.c.(37 °C; proc.) = ?  
 arb.unit/l

**Erythrocytes(Blood)—**  
**Erythrocyte Tar antigen;**  
 arbitrary number(procedure)  
 NPU20393  
 Ercs(B)—Erythrocyte Tar antigen; arb.num.(proc.) = ?

**Plasma—**  
**Erythrocyte Tc<sup>a</sup> antibody;**  
 arbitrary concentration(20 °C; procedure)  
 NPU20817  
 P—Erythrocyte Tc<sup>a</sup> antibody; arb.c.(20 °C; proc.) = ?

**Plasma—**  
**Erythrocyte Tc<sup>a</sup> antibody;**  
 arbitrary concentration(37 °C; procedure)  
 NPU20818  
 P—Erythrocyte Tc<sup>a</sup> antibody; arb.c.(37 °C; proc.) = ?

**Plasma—**  
**Erythrocyte Tc<sup>a</sup> antibody;**  
 arbitrary substance concentration(20 °C; procedure)  
 arbitrary unit/litre  
 NPU21269  
 P—Erythrocyte Tc<sup>a</sup> antibody; arb.subst.c.(20 °C; proc.) = ?  
 arb.unit/l

**Plasma—**  
**Erythrocyte Tc<sup>a</sup> antibody;**  
 arbitrary substance concentration(37 °C; procedure)  
 arbitrary unit/litre  
 NPU21270  
 P—Erythrocyte Tc<sup>a</sup> antibody; arb.subst.c.(37 °C; proc.) = ?  
 arb.unit/l

**Erythrocytes(Blood)—**  
**Erythrocyte Tc<sup>a</sup> antigen;**  
 arbitrary number(procedure)  
 NPU20394  
 Ercs(B)—Erythrocyte Tc<sup>a</sup> antigen; arb.num.(proc.) = ?

**Plasma—**  
**Erythrocyte Tc<sup>b</sup> antibody;**  
 arbitrary concentration(20 °C; procedure)  
 NPU20819  
 P—Erythrocyte Tc<sup>b</sup> antibody; arb.c.(20 °C; proc.) = ?

**Plasma—**  
**Erythrocyte Tc<sup>b</sup> antibody;**  
 arbitrary concentration(37 °C; procedure)  
 NPU20820  
 P—Erythrocyte Tc<sup>b</sup> antibody; arb.c.(37 °C; proc.) = ?

**Plasma—**  
**Erythrocyte Tc<sup>b</sup> antibody;**  
 arbitrary substance concentration(20 °C; procedure)  
 arbitrary unit/litre  
 NPU21271  
 P—Erythrocyte Tc<sup>b</sup> antibody; arb.subst.c.(20 °C; proc.) = ?  
 arb.unit/l

**Plasma—**  
**Erythrocyte Tc<sup>b</sup> antibody;**  
 arbitrary substance concentration(37 °C; procedure)  
 arbitrary unit/litre  
 NPU21272  
 P—Erythrocyte Tc<sup>b</sup> antibody; arb.subst.c.(37 °C; proc.) = ?  
 arb.unit/l

**Erythrocytes(Blood)—**  
**Erythrocyte Tc<sup>b</sup> antigen;**  
 arbitrary number(procedure)  
 NPU20395  
 Ercs(B)—Erythrocyte Tc<sup>b</sup> antigen; arb.num.(proc.) = ?

**Plasma—**  
**Erythrocyte Tc<sup>c</sup> antibody;**  
 arbitrary concentration(20 °C; procedure)  
 NPU20821  
 P—Erythrocyte Tc<sup>c</sup> antibody; arb.c.(20 °C; proc.) = ?

**Plasma—**  
**Erythrocyte Tc<sup>c</sup> antibody;**  
 arbitrary concentration(37 °C; procedure)  
 NPU20822  
 P—Erythrocyte Tc<sup>c</sup> antibody; arb.c.(37 °C; proc.) = ?

**Plasma—**  
**Erythrocyte Tc<sup>c</sup> antibody;**  
 arbitrary substance concentration(20 °C; procedure)  
 arbitrary unit/litre  
 NPU21273  
 P—Erythrocyte Tc<sup>c</sup> antibody; arb.subst.c.(20 °C; proc.) = ?  
 arb.unit/l

**Plasma—**  
**Erythrocyte Tc<sup>c</sup> antibody;**  
 arbitrary substance concentration(37 °C; procedure)  
 arbitrary unit/litre  
 NPU21274  
 P—Erythrocyte Tc<sup>c</sup> antibody; arb.subst.c.(37 °C; proc.) = ?  
 arb.unit/l

**Erythrocytes(Blood)—**  
**Erythrocyte Tc<sup>c</sup> antigen;**  
 arbitrary number(procedure)  
 NPU20396  
 Ercs(B)—Erythrocyte Tc<sup>c</sup> antigen; arb.num.(proc.) = ?

**Plasma—**  
**Erythrocyte TOU antibody;**  
 arbitrary concentration(20 °C; procedure)  
 NPU20823  
 P—Erythrocyte TOU antibody; arb.c.(20 °C; proc.) = ?

**Plasma—**  
**Erythrocyte TOU antibody;**  
 arbitrary concentration(37 °C; procedure)  
 NPU20824  
 P—Erythrocyte TOU antibody; arb.c.(37 °C; proc.) = ?

**Plasma—**  
**Erythrocyte TOU antibody;**  
 arbitrary substance concentration(20 °C; procedure)  
 arbitrary unit/litre  
 NPU21275  
 P—Erythrocyte TOU antibody; arb.subst.c.(20 °C; proc.) = ?  
 arb.unit/l

**Plasma—**  
**Erythrocyte TOU antibody;**  
 arbitrary substance concentration(37 °C; procedure)  
 arbitrary unit/litre  
 NPU21276  
 P—Erythrocyte TOU antibody; arb.subst.c.(37 °C; proc.) = ?  
 arb.unit/l

**Erythrocytes(Blood)—**  
**Erythrocyte TOU antigen;**  
 arbitrary number(procedure)  
 NPU20397  
 Ercs(B)—Erythrocyte TOU antigen; arb.num.(proc.) = ?

**Plasma—**  
**Erythrocyte Tr<sup>a</sup> antibody;**  
 arbitrary concentration(20 °C; procedure)  
 NPU20825  
 P—Erythrocyte Tr<sup>a</sup> antibody; arb.c.(20 °C; proc.) = ?

**Plasma—**  
**Erythrocyte Tr<sup>a</sup> antibody;**  
 arbitrary concentration(37 °C; procedure)  
 NPU20826  
 P—Erythrocyte Tr<sup>a</sup> antibody; arb.c.(37 °C; proc.) = ?

**Plasma—**  
**Erythrocyte Tr<sup>a</sup> antibody;**  
 arbitrary substance concentration(20 °C; procedure)  
 arbitrary unit/litre  
 NPU21277  
 P—Erythrocyte Tr<sup>a</sup> antibody; arb.subst.c.(20 °C; proc.) = ?  
 arb.unit/l

**Plasma—**  
**Erythrocyte Tr<sup>a</sup> antibody;**  
 arbitrary substance concentration(37 °C; procedure)  
 arbitrary unit/litre  
 NPU21278  
 P—Erythrocyte Tr<sup>a</sup> antibody; arb.subst.c.(37 °C; proc.) = ?  
 arb.unit/l

**Erythrocytes(Blood)—**  
**Erythrocyte Tr<sup>a</sup> antigen;**  
 arbitrary number(procedure)  
 NPU20398  
 Ercs(B)—Erythrocyte Tr<sup>a</sup> antigen; arb.num.(proc.) = ?

**Plasma—**  
**Erythrocyte TSEN antibody;**  
 arbitrary concentration(20 °C; procedure)  
 NPU20827  
 P—Erythrocyte TSEN antibody; arb.c.(20 °C; proc.) = ?

**Plasma—**  
**Erythrocyte TSEN antibody;**  
 arbitrary concentration(37 °C; procedure)  
 NPU20828  
 P—Erythrocyte TSEN antibody; arb.c.(37 °C; proc.) = ?

**Plasma—**  
**Erythrocyte TSEN antibody;**  
 arbitrary substance concentration(20 °C; procedure)  
 arbitrary unit/litre  
 NPU21279  
 P—Erythrocyte TSEN antibody; arb.subst.c.(20 °C; proc.) = ?  
 arb.unit/l

**Plasma—**  
**Erythrocyte TSEN antibody;**  
 arbitrary substance concentration(37 °C; procedure)  
 arbitrary unit/litre  
 NPU21280  
 P—Erythrocyte TSEN antibody; arb.subst.c.(37 °C; proc.) = ?  
 arb.unit/l

**Erythrocytes(Blood)—**  
**Erythrocyte TSEN antigen;**  
**arbitrary number(procedure)**  
**NPU20399**  
ErCs(B)—Erythrocyte TSEN antigen; arb.num.(proc.) = ?

**Plasma—**  
**Erythrocyte U antibody;**  
**arbitrary concentration(20 °C; procedure)**  
**NPU20829**  
P—Erythrocyte U antibody; arb.c.(20 °C; proc.) = ?

**Plasma—**  
**Erythrocyte U antibody;**  
**arbitrary concentration(37 °C; procedure)**  
**NPU20830**  
P—Erythrocyte U antibody; arb.c.(37 °C; proc.) = ?

**Plasma—**  
**Erythrocyte U antibody;**  
**arbitrary substance concentration(20 °C; procedure)**  
**arbitrary unit/litre**  
**NPU21281**  
P—Erythrocyte U antibody; arb.subst.c.(20 °C; proc.) = ?  
arb.unit/l

**Plasma—**  
**Erythrocyte U antibody;**  
**arbitrary substance concentration(37 °C; procedure)**  
**arbitrary unit/litre**  
**NPU21282**  
P—Erythrocyte U antibody; arb.subst.c.(37 °C; proc.) = ?  
arb.unit/l

**Erythrocytes(Blood)—**  
**Erythrocyte U antigen;**  
**arbitrary number(procedure)**  
**NPU20400**  
ErCs(B)—Erythrocyte U antigen; arb.num.(proc.) = ?

**Plasma—**  
**Erythrocyte U<sup>I</sup> antibody;**  
**arbitrary concentration(20 °C; procedure)**  
**NPU20831**  
P—Erythrocyte U<sup>I</sup> antibody; arb.c.(20 °C; proc.) = ?

**Plasma—**  
**Erythrocyte U<sup>I</sup> antibody;**  
**arbitrary concentration(37 °C; procedure)**  
**NPU20832**  
P—Erythrocyte U<sup>I</sup> antibody; arb.c.(37 °C; proc.) = ?

**Plasma—**  
**Erythrocyte U<sup>I</sup> antibody;**  
**arbitrary substance concentration(20 °C; procedure)**  
**arbitrary unit/litre**  
**NPU21283**  
P—Erythrocyte U<sup>I</sup> antibody; arb.subst.c.(20 °C; proc.) = ?  
arb.unit/l

**Plasma—**  
**Erythrocyte U<sup>I</sup> antibody;**  
**arbitrary substance concentration(37 °C; procedure)**  
**arbitrary unit/litre**  
**NPU21284**  
P—Erythrocyte U<sup>I</sup> antibody; arb.subst.c.(37 °C; proc.) = ?  
arb.unit/l

**Erythrocytes(Blood)—**  
**Erythrocyte U<sup>I</sup> antigen;**  
**arbitrary number(procedure)**  
**NPU20401**  
ErCs(B)—Erythrocyte U<sup>I</sup> antigen; arb.num.(proc.) = ?

**Plasma—**  
**Erythrocyte UMC antibody;**  
**arbitrary concentration(20 °C; procedure)**  
**NPU20833**  
P—Erythrocyte UMC antibody; arb.c.(20 °C; proc.) = ?

**Plasma—**  
**Erythrocyte UMC antibody;**  
**arbitrary concentration(37 °C; procedure)**  
**NPU20834**  
P—Erythrocyte UMC antibody; arb.c.(37 °C; proc.) = ?

**Plasma—**  
**Erythrocyte UMC antibody;**  
**arbitrary substance concentration(20 °C; procedure)**  
**arbitrary unit/litre**  
**NPU21285**  
P—Erythrocyte UMC antibody; arb.subst.c.(20 °C; proc.) = ?  
arb.unit/l

**Plasma—**  
**Erythrocyte UMC antibody;**  
**arbitrary substance concentration(37 °C; procedure)**  
**arbitrary unit/litre**  
**NPU21286**  
P—Erythrocyte UMC antibody; arb.subst.c.(37 °C; proc.) = ?  
arb.unit/l

**Erythrocytes(Blood)—**  
**Erythrocyte UMC antigen;**  
**arbitrary number(procedure)**  
**NPU20402**  
ErCs(B)—Erythrocyte UMC antigen; arb.num.(proc.) = ?

**Plasma—**  
**Erythrocyte V antibody;**  
**arbitrary concentration(20 °C; procedure)**  
**NPU20835**  
P—Erythrocyte V antibody; arb.c.(20 °C; proc.) = ?

**Plasma—**  
**Erythrocyte V antibody;**  
**arbitrary concentration(37 °C; procedure)**  
**NPU20836**  
P—Erythrocyte V antibody; arb.c.(37 °C; proc.) = ?

**Plasma—**  
**Erythrocyte V antibody;**  
**arbitrary substance concentration(20 °C; procedure)**  
**arbitrary unit/litre**  
**NPU21287**  
P—Erythrocyte V antibody; arb.subst.c.(20 °C; proc.) = ?  
arb.unit/l

**Plasma—**  
**Erythrocyte V antibody;**  
**arbitrary substance concentration(37 °C; procedure)**  
**arbitrary unit/litre**  
**NPU21288**  
P—Erythrocyte V antibody; arb.subst.c.(37 °C; proc.) = ?  
arb.unit/l

**Erythrocytes(Blood)—**  
**Erythrocyte V antigen;**  
**arbitrary number(procedure)**  
**NPU20403**  
ErCs(B)—Erythrocyte V antigen; arb.num.(proc.) = ?

**Plasma—**  
**Erythrocyte Vg<sup>a</sup> antibody;**  
**arbitrary concentration(20 °C; procedure)**  
**NPU20837**  
P—Erythrocyte Vg<sup>a</sup> antibody; arb.c.(20 °C; proc.) = ?

**Plasma—**  
**Erythrocyte Vg<sup>a</sup> antibody;**  
 arbitrary concentration(37 °C; procedure)  
 NPU20838  
 P—Erythrocyte Vg<sup>a</sup> antibody; arb.c.(37 °C; proc.) = ?

**Plasma—**  
**Erythrocyte Vg<sup>a</sup> antibody;**  
 arbitrary substance concentration(20 °C; procedure)  
 arbitrary unit/litre  
 NPU21289  
 P—Erythrocyte Vg<sup>a</sup> antibody; arb.subst.c.(20 °C; proc.) = ?  
 arb.unit/l

**Plasma—**  
**Erythrocyte Vg<sup>a</sup> antibody;**  
 arbitrary substance concentration(37 °C; procedure)  
 arbitrary unit/litre  
 NPU21290  
 P—Erythrocyte Vg<sup>a</sup> antibody; arb.subst.c.(37 °C; proc.) = ?  
 arb.unit/l

**Erythrocytes(Blood)—**  
**Erythrocyte Vg<sup>a</sup> antigen;**  
 arbitrary number(procedure)  
 NPU20404  
 ErCs(B)—Erythrocyte Vg<sup>a</sup> antigen; arb.num.(proc.) = ?

**Plasma—**  
**Erythrocyte Vil antibody;**  
 arbitrary concentration(20 °C; procedure)  
 NPU20839  
 P—Erythrocyte Vil antibody; arb.c.(20 °C; proc.) = ?

**Plasma—**  
**Erythrocyte Vil antibody;**  
 arbitrary concentration(37 °C; procedure)  
 NPU20840  
 P—Erythrocyte Vil antibody; arb.c.(37 °C; proc.) = ?

**Plasma—**  
**Erythrocyte Vil antibody;**  
 arbitrary substance concentration(20 °C; procedure)  
 arbitrary unit/litre  
 NPU21291  
 P—Erythrocyte Vil antibody; arb.subst.c.(20 °C; proc.) = ?  
 arb.unit/l

**Plasma—**  
**Erythrocyte Vil antibody;**  
 arbitrary substance concentration(37 °C; procedure)  
 arbitrary unit/litre  
 NPU21292  
 P—Erythrocyte Vil antibody; arb.subst.c.(37 °C; proc.) = ?  
 arb.unit/l

**Erythrocytes(Blood)—**  
**Erythrocyte Vil antigen;**  
 arbitrary number(procedure)  
 NPU20405  
 ErCs(B)—Erythrocyte Vil antigen; arb.num.(proc.) = ?

**Plasma—**  
**Erythrocyte VLAN antibody;**  
 arbitrary concentration(20 °C; procedure)  
 NPU20841  
 P—Erythrocyte VLAN antibody; arb.c.(20 °C; proc.) = ?

**Plasma—**  
**Erythrocyte VLAN antibody;**  
 arbitrary concentration(37 °C; procedure)  
 NPU20842  
 P—Erythrocyte VLAN antibody; arb.c.(37 °C; proc.) = ?

**Plasma—**  
**Erythrocyte VLAN antibody;**  
 arbitrary substance concentration(20 °C; procedure)  
 arbitrary unit/litre  
 NPU21293  
 P—Erythrocyte VLAN antibody; arb.subst.c.(20 °C; proc.) = ?  
 arb.unit/l

**Plasma—**  
**Erythrocyte VLAN antibody;**  
 arbitrary substance concentration(37 °C; procedure)  
 arbitrary unit/litre  
 NPU21294  
 P—Erythrocyte VLAN antibody; arb.subst.c.(37 °C; proc.) = ?  
 arb.unit/l

**Erythrocytes(Blood)—**  
**Erythrocyte VLAN antigen;**  
 arbitrary number(procedure)  
 NPU20406  
 ErCs(B)—Erythrocyte VLAN antigen; arb.num.(proc.) = ?

**Plasma—**  
**Erythrocyte Vr antibody;**  
 arbitrary concentration(20 °C; procedure)  
 NPU20843  
 P—Erythrocyte Vr antibody; arb.c.(20 °C; proc.) = ?

**Plasma—**  
**Erythrocyte Vr antibody;**  
 arbitrary concentration(37 °C; procedure)  
 NPU20844  
 P—Erythrocyte Vr antibody; arb.c.(37 °C; proc.) = ?

**Plasma—**  
**Erythrocyte Vr antibody;**  
 arbitrary substance concentration(20 °C; procedure)  
 arbitrary unit/litre  
 NPU21295  
 P—Erythrocyte Vr antibody; arb.subst.c.(20 °C; proc.) = ?  
 arb.unit/l

**Plasma—**  
**Erythrocyte Vr antibody;**  
 arbitrary substance concentration(37 °C; procedure)  
 arbitrary unit/litre  
 NPU21296  
 P—Erythrocyte Vr antibody; arb.subst.c.(37 °C; proc.) = ?  
 arb.unit/l

**Erythrocytes(Blood)—**  
**Erythrocyte Vr antigen;**  
 arbitrary number(procedure)  
 NPU20407  
 ErCs(B)—Erythrocyte Vr antigen; arb.num.(proc.) = ?

**Plasma—**  
**Erythrocyte VS antibody;**  
 arbitrary concentration(20 °C; procedure)  
 NPU20845  
 P—Erythrocyte VS antibody; arb.c.(20 °C; proc.) = ?

**Plasma—**  
**Erythrocyte VS antibody;**  
 arbitrary concentration(37 °C; procedure)  
 NPU20846  
 P—Erythrocyte VS antibody; arb.c.(37 °C; proc.) = ?

**Plasma—**  
**Erythrocyte VS antibody;**  
 arbitrary substance concentration(20 °C; procedure)  
 arbitrary unit/litre  
 NPU21297  
 P—Erythrocyte VS antibody; arb.subst.c.(20 °C; proc.) = ?  
 arb.unit/l

**Plasma—**  
**Erythrocyte VS antibody;**  
**arbitrary substance concentration(37 °C; procedure)**  
**arbitrary unit/litre**  
**NPU21298**  
P—Erythrocyte VS antibody; arb.subst.c.(37 °C; proc.) = ?  
arb.unit/l

**Erythrocytes(Blood)—**  
**Erythrocyte VS antigen;**  
**arbitrary number(procedure)**  
**NPU20408**  
ErCs(B)—Erythrocyte VS antigen; arb.num.(proc.) = ?

**Plasma—**  
**Erythrocyte Vw antibody;**  
**arbitrary concentration(20 °C; procedure)**  
**NPU20847**  
P—Erythrocyte Vw antibody; arb.c.(20 °C; proc.) = ?

**Plasma—**  
**Erythrocyte Vw antibody;**  
**arbitrary concentration(37 °C; procedure)**  
**NPU20848**  
P—Erythrocyte Vw antibody; arb.c.(37 °C; proc.) = ?

**Plasma—**  
**Erythrocyte Vw antibody;**  
**arbitrary substance concentration(20 °C; procedure)**  
**arbitrary unit/litre**  
**NPU21299**  
P—Erythrocyte Vw antibody; arb.subst.c.(20 °C; proc.) = ?  
arb.unit/l

**Plasma—**  
**Erythrocyte Vw antibody;**  
**arbitrary substance concentration(37 °C; procedure)**  
**arbitrary unit/litre**  
**NPU21300**  
P—Erythrocyte Vw antibody; arb.subst.c.(37 °C; proc.) = ?  
arb.unit/l

**Erythrocytes(Blood)—**  
**Erythrocyte Vw antigen;**  
**arbitrary number(procedure)**  
**NPU20409**  
ErCs(B)—Erythrocyte Vw antigen; arb.num.(proc.) = ?

**Plasma—**  
**Erythrocyte WARR antibody;**  
**arbitrary concentration(20 °C; procedure)**  
**NPU20849**  
P—Erythrocyte WARR antibody; arb.c.(20 °C; proc.) = ?

**Plasma—**  
**Erythrocyte WARR antibody;**  
**arbitrary concentration(37 °C; procedure)**  
**NPU20850**  
P—Erythrocyte WARR antibody; arb.c.(37 °C; proc.) = ?

**Plasma—**  
**Erythrocyte WARR antibody;**  
**arbitrary substance concentration(20 °C; procedure)**  
**arbitrary unit/litre**  
**NPU21301**  
P—Erythrocyte WARR antibody; arb.subst.c.(20 °C; proc.) = ?  
arb.unit/l

**Plasma—**  
**Erythrocyte WARR antibody;**  
**arbitrary substance concentration(37 °C; procedure)**  
**arbitrary unit/litre**  
**NPU21302**  
P—Erythrocyte WARR antibody; arb.subst.c.(37 °C; proc.) = ?  
arb.unit/l

**Erythrocytes(Blood)—**  
**Erythrocyte WARR antigen;**  
**arbitrary number(procedure)**  
**NPU20410**  
ErCs(B)—Erythrocyte WARR antigen; arb.num.(proc.) = ?

**Plasma—**  
**Erythrocyte Wb antibody;**  
**arbitrary concentration(20 °C; procedure)**  
**NPU20851**  
P—Erythrocyte Wb antibody; arb.c.(20 °C; proc.) = ?

**Plasma—**  
**Erythrocyte Wb antibody;**  
**arbitrary concentration(37 °C; procedure)**  
**NPU20852**  
P—Erythrocyte Wb antibody; arb.c.(37 °C; proc.) = ?

**Plasma—**  
**Erythrocyte Wb antibody;**  
**arbitrary substance concentration(20 °C; procedure)**  
**arbitrary unit/litre**  
**NPU21303**  
P—Erythrocyte Wb antibody; arb.subst.c.(20 °C; proc.) = ?  
arb.unit/l

**Plasma—**  
**Erythrocyte Wb antibody;**  
**arbitrary substance concentration(37 °C; procedure)**  
**arbitrary unit/litre**  
**NPU21304**  
P—Erythrocyte Wb antibody; arb.subst.c.(37 °C; proc.) = ?  
arb.unit/l

**Erythrocytes(Blood)—**  
**Erythrocyte Wb antigen;**  
**arbitrary number(procedure)**  
**NPU20411**  
ErCs(B)—Erythrocyte Wb antigen; arb.num.(proc.) = ?

**Plasma—**  
**Erythrocyte Wd<sup>a</sup> antibody;**  
**arbitrary concentration(20 °C; procedure)**  
**NPU20853**  
P—Erythrocyte Wd<sup>a</sup> antibody; arb.c.(20 °C; proc.) = ?

**Plasma—**  
**Erythrocyte Wd<sup>a</sup> antibody;**  
**arbitrary concentration(37 °C; procedure)**  
**NPU20854**  
P—Erythrocyte Wd<sup>a</sup> antibody; arb.c.(37 °C; proc.) = ?

**Plasma—**  
**Erythrocyte Wd<sup>a</sup> antibody;**  
**arbitrary substance concentration(20 °C; procedure)**  
**arbitrary unit/litre**  
**NPU21305**  
P—Erythrocyte Wd<sup>a</sup> antibody; arb.subst.c.(20 °C; proc.) = ?  
arb.unit/l

**Plasma—**  
**Erythrocyte Wd<sup>a</sup> antibody;**  
**arbitrary substance concentration(37 °C; procedure)**  
**arbitrary unit/litre**  
**NPU21306**  
P—Erythrocyte Wd<sup>a</sup> antibody; arb.subst.c.(37 °C; proc.) = ?  
arb.unit/l

**Erythrocytes(Blood)—**  
**Erythrocyte Wd<sup>a</sup> antigen;**  
**arbitrary number(procedure)**  
**NPU20412**  
ErCs(B)—Erythrocyte Wd<sup>a</sup> antigen; arb.num.(proc.) = ?

**Plasma—**  
**Erythrocyte WES<sup>a</sup> antibody;**  
**arbitrary concentration(20 °C; procedure)**  
**NPU20855**  
P—Erythrocyte WES<sup>a</sup> antibody; arb.c.(20 °C; proc.) = ?

**Plasma—**  
**Erythrocyte WES<sup>a</sup> antibody;**  
**arbitrary concentration(37 °C; procedure)**  
**NPU20856**  
P—Erythrocyte WES<sup>a</sup> antibody; arb.c.(37 °C; proc.) = ?

**Plasma—**  
**Erythrocyte WES<sup>a</sup> antibody;**  
**arbitrary substance concentration(20 °C; procedure)**  
**arbitrary unit/litre**  
**NPU21307**  
P—Erythrocyte WES<sup>a</sup> antibody; arb.subst.c.(20 °C; proc.) = ?  
arb.unit/l

**Plasma—**  
**Erythrocyte WES<sup>a</sup> antibody;**  
**arbitrary substance concentration(37 °C; procedure)**  
**arbitrary unit/litre**  
**NPU21308**  
P—Erythrocyte WES<sup>a</sup> antibody; arb.subst.c.(37 °C; proc.) = ?  
arb.unit/l

**Erythrocytes(Blood)—**  
**Erythrocyte WES<sup>a</sup> antigen;**  
**arbitrary number(procedure)**  
**NPU20413**  
ErCs(B)—Erythrocyte WES<sup>a</sup> antigen; arb.num.(proc.) = ?

**Plasma—**  
**Erythrocyte WES<sup>b</sup> antibody;**  
**arbitrary concentration(20 °C; procedure)**  
**NPU20857**  
P—Erythrocyte WES<sup>b</sup> antibody; arb.c.(20 °C; proc.) = ?

**Plasma—**  
**Erythrocyte WES<sup>b</sup> antibody;**  
**arbitrary concentration(37 °C; procedure)**  
**NPU20858**  
P—Erythrocyte WES<sup>b</sup> antibody; arb.c.(37 °C; proc.) = ?

**Plasma—**  
**Erythrocyte WES<sup>b</sup> antibody;**  
**arbitrary substance concentration(20 °C; procedure)**  
**arbitrary unit/litre**  
**NPU21309**  
P—Erythrocyte WES<sup>b</sup> antibody; arb.subst.c.(20 °C; proc.) = ?  
arb.unit/l

**Plasma—**  
**Erythrocyte WES<sup>b</sup> antibody;**  
**arbitrary substance concentration(37 °C; procedure)**  
**arbitrary unit/litre**  
**NPU21310**  
P—Erythrocyte WES<sup>b</sup> antibody; arb.subst.c.(37 °C; proc.) = ?  
arb.unit/l

**Erythrocytes(Blood)—**  
**Erythrocyte WES<sup>b</sup> antigen;**  
**arbitrary number(procedure)**  
**NPU20414**  
ErCs(B)—Erythrocyte WES<sup>b</sup> antigen; arb.num.(proc.) = ?

**Plasma—**  
**Erythrocyte WH antibody;**  
**arbitrary concentration(20 °C; procedure)**  
**NPU20859**  
P—Erythrocyte WH antibody; arb.c.(20 °C; proc.) = ?

**Plasma—**  
**Erythrocyte WH antibody;**  
**arbitrary concentration(37 °C; procedure)**  
**NPU20860**  
P—Erythrocyte WH antibody; arb.c.(37 °C; proc.) = ?

**Plasma—**  
**Erythrocyte WH antibody;**  
**arbitrary substance concentration(20 °C; procedure)**  
**arbitrary unit/litre**  
**NPU21311**  
P—Erythrocyte WH antibody; arb.subst.c.(20 °C; proc.) = ?  
arb.unit/l

**Plasma—**  
**Erythrocyte WH antibody;**  
**arbitrary substance concentration(37 °C; procedure)**  
**arbitrary unit/litre**  
**NPU21312**  
P—Erythrocyte WH antibody; arb.subst.c.(37 °C; proc.) = ?  
arb.unit/l

**Erythrocytes(Blood)—**  
**Erythrocyte WH antigen;**  
**arbitrary number(procedure)**  
**NPU20415**  
ErCs(B)—Erythrocyte WH antigen; arb.num.(proc.) = ?

**Plasma—**  
**Erythrocyte Wr<sup>a</sup> antibody;**  
**arbitrary concentration(20 °C; procedure)**  
**NPU20861**  
P—Erythrocyte Wr<sup>a</sup> antibody; arb.c.(20 °C; proc.) = ?

**Plasma—**  
**Erythrocyte Wr<sup>a</sup> antibody;**  
**arbitrary concentration(37 °C; procedure)**  
**NPU20862**  
P—Erythrocyte Wr<sup>a</sup> antibody; arb.c.(37 °C; proc.) = ?

**Plasma—**  
**Erythrocyte Wr<sup>a</sup> antibody;**  
**arbitrary substance concentration(20 °C; procedure)**  
**arbitrary unit/litre**  
**NPU21313**  
P—Erythrocyte Wr<sup>a</sup> antibody; arb.subst.c.(20 °C; proc.) = ?  
arb.unit/l

**Plasma—**  
**Erythrocyte Wr<sup>a</sup> antibody;**  
**arbitrary substance concentration(37 °C; procedure)**  
**arbitrary unit/litre**  
**NPU21314**  
P—Erythrocyte Wr<sup>a</sup> antibody; arb.subst.c.(37 °C; proc.) = ?  
arb.unit/l

**Erythrocytes(Blood)—**  
**Erythrocyte Wr<sup>a</sup> antigen;**  
**arbitrary number(procedure)**  
**NPU20416**  
ErCs(B)—Erythrocyte Wr<sup>a</sup> antigen; arb.num.(proc.) = ?

**Plasma—**  
**Erythrocyte Wr<sup>b</sup> antibody;**  
**arbitrary concentration(20 °C; procedure)**  
**NPU20863**  
P—Erythrocyte Wr<sup>b</sup> antibody; arb.c.(20 °C; proc.) = ?

**Plasma—**  
**Erythrocyte Wr<sup>b</sup> antibody;**  
**arbitrary concentration(37 °C; procedure)**  
**NPU20864**  
P—Erythrocyte Wr<sup>b</sup> antibody; arb.c.(37 °C; proc.) = ?

**Plasma—**  
**Erythrocyte Wr<sup>b</sup>antibody;**  
arbitrary substance concentration(20 °C; procedure)  
arbitrary unit/litre  
**NPU21315**  
P—Erythrocyte Wr<sup>b</sup>antibody; arb.subst.c.(20 °C; proc.) = ?  
arb.unit/l

**Plasma—**  
**Erythrocyte Wr<sup>b</sup>antibody;**  
arbitrary substance concentration(37 °C; procedure)  
arbitrary unit/litre  
**NPU21316**  
P—Erythrocyte Wr<sup>b</sup>antibody; arb.subst.c.(37 °C; proc.) = ?  
arb.unit/l

**Erythrocytes(Blood)—**  
**Erythrocyte Wr<sup>b</sup>antigen;**  
arbitrary number(procedure)  
**NPU20417**  
Ercs(B)—Erythrocyte Wr<sup>b</sup>antigen; arb.num.(proc.) = ?

**Plasma—**  
**Erythrocyte Wu antibody;**  
arbitrary concentration(20 °C; procedure)  
**NPU20865**  
P—Erythrocyte Wu antibody; arb.c.(20 °C; proc.) = ?

**Plasma—**  
**Erythrocyte Wu antibody;**  
arbitrary concentration(37 °C; procedure)  
**NPU20866**  
P—Erythrocyte Wu antibody; arb.c.(37 °C; proc.) = ?

**Plasma—**  
**Erythrocyte Wu antibody;**  
arbitrary substance concentration(20 °C; procedure)  
arbitrary unit/litre  
**NPU21317**  
P—Erythrocyte Wu antibody; arb.subst.c.(20 °C; proc.) = ?  
arb.unit/l

**Plasma—**  
**Erythrocyte Wu antibody;**  
arbitrary substance concentration(37 °C; procedure)  
arbitrary unit/litre  
**NPU21318**  
P—Erythrocyte Wu antibody; arb.subst.c.(37 °C; proc.) = ?  
arb.unit/l

**Erythrocytes(Blood)—**  
**Erythrocyte Wu antigen;**  
arbitrary number(procedure)  
**NPU20418**  
Ercs(B)—Erythrocyte Wu antigen; arb.num.(proc.) = ?

**Plasma—**  
**Erythrocyte Xg<sup>a</sup> antibody;**  
arbitrary concentration(20 °C; procedure)  
**NPU20867**  
P—Erythrocyte Xg<sup>a</sup> antibody; arb.c.(20 °C; proc.) = ?

**Plasma—**  
**Erythrocyte Xg<sup>a</sup> antibody;**  
arbitrary concentration(37 °C; procedure)  
**NPU20868**  
P—Erythrocyte Xg<sup>a</sup> antibody; arb.c.(37 °C; proc.) = ?

**Plasma—**  
**Erythrocyte Xg<sup>a</sup> antibody;**  
arbitrary substance concentration(20 °C; procedure)  
arbitrary unit/litre  
**NPU21319**  
P—Erythrocyte Xg<sup>a</sup> antibody; arb.subst.c.(20 °C; proc.) = ?  
arb.unit/l

**Plasma—**  
**Erythrocyte Xg<sup>a</sup> antibody;**  
arbitrary substance concentration(37 °C; procedure)  
arbitrary unit/litre  
**NPU21320**  
P—Erythrocyte Xg<sup>a</sup> antibody; arb.subst.c.(37 °C; proc.) = ?  
arb.unit/l

**Erythrocytes(Blood)—**  
**Erythrocyte Xg<sup>a</sup> antigen;**  
arbitrary number(procedure)  
**NPU20419**  
Ercs(B)—Erythrocyte Xg<sup>a</sup> antigen; arb.num.(proc.) = ?

**Plasma—**  
**Erythrocyte Yk<sup>a</sup> antibody;**  
arbitrary concentration(20 °C; procedure)  
**NPU20869**  
P—Erythrocyte Yk<sup>a</sup> antibody; arb.c.(20 °C; proc.) = ?

**Plasma—**  
**Erythrocyte Yk<sup>a</sup> antibody;**  
arbitrary concentration(37 °C; procedure)  
**NPU20870**  
P—Erythrocyte Yk<sup>a</sup> antibody; arb.c.(37 °C; proc.) = ?

**Plasma—**  
**Erythrocyte Yk<sup>a</sup> antibody;**  
arbitrary substance concentration(20 °C; procedure)  
arbitrary unit/litre  
**NPU21321**  
P—Erythrocyte Yk<sup>a</sup> antibody; arb.subst.c.(20 °C; proc.) = ?  
arb.unit/l

**Plasma—**  
**Erythrocyte Yk<sup>a</sup> antibody;**  
arbitrary substance concentration(37 °C; procedure)  
arbitrary unit/litre  
**NPU21322**  
P—Erythrocyte Yk<sup>a</sup> antibody; arb.subst.c.(37 °C; proc.) = ?  
arb.unit/l

**Erythrocytes(Blood)—**  
**Erythrocyte Yk<sup>a</sup> antigen;**  
arbitrary number(procedure)  
**NPU20420**  
Ercs(B)—Erythrocyte Yk<sup>a</sup> antigen; arb.num.(proc.) = ?

**Plasma—**  
**Erythrocyte Yt<sup>a</sup> antibody;**  
arbitrary concentration(20 °C; procedure)  
**NPU20871**  
P—Erythrocyte Yt<sup>a</sup> antibody; arb.c.(20 °C; proc.) = ?

**Plasma—**  
**Erythrocyte Yt<sup>a</sup> antibody;**  
arbitrary concentration(37 °C; procedure)  
**NPU20872**  
P—Erythrocyte Yt<sup>a</sup> antibody; arb.c.(37 °C; proc.) = ?

**Plasma—**  
**Erythrocyte Yt<sup>a</sup> antibody;**  
arbitrary substance concentration(20 °C; procedure)  
arbitrary unit/litre  
**NPU21323**  
P—Erythrocyte Yt<sup>a</sup> antibody; arb.subst.c.(20 °C; proc.) = ?  
arb.unit/l

**Plasma—**  
**Erythrocyte Yt<sup>a</sup> antibody;**  
arbitrary substance concentration(37 °C; procedure)  
arbitrary unit/litre  
**NPU21324**  
P—Erythrocyte Yt<sup>a</sup> antibody; arb.subst.c.(37 °C; proc.) = ?  
arb.unit/l

**Erythrocytes(Blood)—**  
**Erythrocyte Yt<sup>a</sup> antigen;**  
**arbitrary number(procedure)**  
**NPU20421**  
ErCs(B)—Erythrocyte Yt<sup>a</sup> antigen; arb.num.(proc.) = ?

**Plasma—**  
**Erythrocyte Yt<sup>b</sup> antibody;**  
**arbitrary concentration(20 °C; procedure)**  
**NPU20873**  
P—Erythrocyte Yt<sup>b</sup> antibody; arb.c.(20 °C; proc.) = ?

**Plasma—**  
**Erythrocyte Yt<sup>b</sup> antibody;**  
**arbitrary concentration(37 °C; procedure)**  
**NPU20874**  
P—Erythrocyte Yt<sup>b</sup> antibody; arb.c.(37 °C; proc.) = ?

**Plasma—**  
**Erythrocyte Yt<sup>b</sup> antibody;**  
**arbitrary substance concentration(20 °C; procedure)**  
**arbitrary unit/litre**  
**NPU21325**  
P—Erythrocyte Yt<sup>b</sup> antibody; arb.subst.c.(20 °C; proc.) = ?  
arb.unit/l

**Plasma—**  
**Erythrocyte Yt<sup>b</sup> antibody;**  
**arbitrary substance concentration(37 °C; procedure)**  
**arbitrary unit/litre**  
**NPU21326**  
P—Erythrocyte Yt<sup>b</sup> antibody; arb.subst.c.(37 °C; proc.) = ?  
arb.unit/l

**Erythrocytes(Blood)—**  
**Erythrocyte Yt<sup>b</sup> antigen;**  
**arbitrary number(procedure)**  
**NPU20422**  
ErCs(B)—Erythrocyte Yt<sup>b</sup> antigen; arb.num.(proc.) = ?

**Erythrocytes(Blood)—**  
**Erythrocytes;**  
**compatibility(Plasma; donationID; absent present)**  
**NPU21754**  
ErCs(B)—Erythrocytes; compatibility(P; donationID; absent present) = ?

**Plasma—**  
**HLA antibody;**  
**arbitrary concentration(procedure)**  
**NPU21366**  
P—HLA antibody; arb.c.(proc.) = ?

**Plasma—**  
**HLA class antibody;**  
**taxon(list)**  
**NPU21367**  
P—HLA class antibody; taxon(list)  
NPU21368 P—HLA class I antibody; taxon(HLA-A HLA-B HLA-C antibody) = ?  
NPU21369 P—HLA class II antibody; taxon(HLA-DR HLA-DQ HLA-DP antibody) = ?

**Plasma—**  
**HLA class I antibody;**  
**number fraction(panel; procedure)**  
**NPU21407**  
P—HLA class I antibody; num.fr.(panel; proc.) = ?

**Plasma—**  
**HLA class I antibody;**  
**taxon(HLA-A HLA-B HLA-C antibody)**  
**NPU21368**  
P—HLA class I antibody; taxon(HLA-A HLA-B HLA-C antibody)  
= ?

**Leukocytes(Blood)—**  
**HLA class I antigen;**  
**taxon(list)**  
**NPU21374**  
Lkcs(B)—HLA class I antigen; taxon(list)  
NPU21375 Lkcs(B)—HLA-A antigen; taxon = ?  
NPU21376 Lkcs(B)—HLA-B antigen; taxon = ?  
NPU21377 Lkcs(B)—HLA-C antigen; taxon = ?

**Plasma—**  
**HLA class II antibody;**  
**number fraction(panel; procedure)**  
**NPU21408**  
P—HLA class II antibody; num.fr.(panel; proc.) = ?

**Plasma—**  
**HLA class II antibody;**  
**taxon(HLA-DR HLA-DQ HLA-DP antibody)**  
**NPU21369**  
P—HLA class II antibody; taxon(HLA-DR HLA-DQ HLA-DP antibody) = ?

**Leukocytes(Blood)—**  
**HLA class II antigen;**  
**taxon(list)**  
**NPU21384**  
Lkcs(B)—HLA class II antigen; taxon(list)  
NPU21385 Lkcs(B)—HLA-DP antigen; taxon = ?  
NPU21386 Lkcs(B)—HLA-DQ antigen; taxon = ?  
NPU21387 Lkcs(B)—HLA-DR antigen; taxon = ?

**Leukocytes(Blood)—**  
**HLA-A antigen;**  
**taxon**  
**NPU21375**  
Lkcs(B)—HLA-A antigen; taxon = ?

**Leukocytes(Blood)—**  
**HLA-B antigen(B16);**  
**arbitrary number(procedure)**  
**NPU21370**  
Lkcs(B)—HLA-B antigen(B16); arb.num.(proc.) = ?

**Leukocytes(Blood)—**  
**HLA-B antigen(B27);**  
**arbitrary number(procedure)**  
**NPU21371**  
Lkcs(B)—HLA-B antigen(B27); arb.num.(proc.) = ?

**Leukocytes(Blood)—**  
**HLA-B antigen(B38);**  
**arbitrary number(procedure)**  
**NPU21372**  
Lkcs(B)—HLA-B antigen(B38); arb.num.(proc.) = ?

**Leukocytes(Blood)—**  
**HLA-B antigen(B39);**  
**arbitrary number(procedure)**  
**NPU21373**  
Lkcs(B)—HLA-B antigen(B39); arb.num.(proc.) = ?

**Leukocytes(Blood)—**  
**HLA-B antigen;**  
**taxon**  
**NPU21376**  
Lkcs(B)—HLA-B antigen; taxon = ?

**Leukocytes(Blood)—**  
**HLA-C antigen;**  
**taxon**  
**NPU21377**  
Lkcs(B)—HLA-C antigen; taxon = ?

**Leukocytes(Blood)—**  
**HLA-DP antigen;**  
**taxon**  
**NPU21385**  
Lkcs(B)—HLA-DP antigen; taxon = ?

**Leukocytes(Blood)—**  
**HLA-DQ antigen;**  
**taxon**  
**NPU21386**  
Lkcs(B)—HLA-DQ antigen; taxon = ?

**Leukocytes(Blood)—**  
**HLA-DR antigen;**  
**taxon**  
**NPU21387**  
Lkcs(B)—HLA-DR antigen; taxon = ?

**Plasma—**  
**HNA antibody(Immunoglobulin A);**  
**arbitrary concentration(list; procedure)**  
**NPU21978**  
P—HNA antibody(IgA); arb.c.(list; proc.) = ?  
NPU21979 P—HNA-1a antibody(IgA); arb.c.(proc.) = ?  
NPU21980 P—HNA-1b antibody(IgA); arb.c.(proc.) = ?  
NPU21981 P—HNA-1c antibody(IgA); arb.c.(proc.) = ?  
NPU21982 P—HNA-2a antibody(IgA); arb.c.(proc.) = ?  
NPU21983 P—HNA-3a antibody(IgA); arb.c.(proc.) = ?  
NPU21984 P—HNA-4a antibody(IgA); arb.c.(proc.) = ?  
NPU21985 P—HNA-5a antibody(IgA); arb.c.(proc.) = ?

**Plasma—**  
**HNA antibody(Immunoglobulin A);**  
**taxon**  
**NPU21923**  
P—HNA antibody(IgA); taxon = ?

**Plasma—**  
**HNA antibody(Immunoglobulin G);**  
**arbitrary concentration(list; procedure)**  
**NPU21962**  
P—HNA antibody(IgG); arb.c.(list; proc.) = ?  
NPU21963 P—HNA-1a antibody(IgG); arb.c.(proc.) = ?  
NPU21964 P—HNA-1b antibody(IgG); arb.c.(proc.) = ?  
NPU21965 P—HNA-1c antibody(IgG); arb.c.(proc.) = ?  
NPU21966 P—HNA-2a antibody(IgG); arb.c.(proc.) = ?  
NPU21967 P—HNA-3a antibody(IgG); arb.c.(proc.) = ?  
NPU21968 P—HNA-4a antibody(IgG); arb.c.(proc.) = ?  
NPU21969 P—HNA-5a antibody(IgG); arb.c.(proc.) = ?

**Plasma—**  
**HNA antibody(Immunoglobulin G);**  
**taxon**  
**NPU21922**  
P—HNA antibody(IgG); taxon = ?

**Plasma—**  
**HNA antibody(Immunoglobulin M);**  
**arbitrary concentration(list; procedure)**  
**NPU21970**  
P—HNA antibody(IgM); arb.c.(list; proc.) = ?  
NPU21971 P—HNA-1a antibody(IgM); arb.c.(proc.) = ?  
NPU21972 P—HNA-1b antibody(IgM); arb.c.(proc.) = ?  
NPU21973 P—HNA-1c antibody(IgM); arb.c.(proc.) = ?  
NPU21974 P—HNA-2a antibody(IgM); arb.c.(proc.) = ?  
NPU21975 P—HNA-3a antibody(IgM); arb.c.(proc.) = ?  
NPU21976 P—HNA-4a antibody(IgM); arb.c.(proc.) = ?  
NPU21977 P—HNA-5a antibody(IgM); arb.c.(proc.) = ?

**Plasma—**  
**HNA antibody(Immunoglobulin M);**  
**taxon**  
**NPU21924**  
P—HNA antibody(IgM); taxon = ?

**Plasma—**  
**HNA antibody;**  
**arbitrary concentration(list; procedure)**  
**NPU21764**  
P—HNA antibody; arb.c.(list; proc.) = ?  
NPU21765 P—HNA-1a antibody; arb.c.(proc.) = ?  
NPU21766 P—HNA-1b antibody; arb.c.(proc.) = ?  
NPU21767 P—HNA-1c antibody; arb.c.(proc.) = ?  
NPU21768 P—HNA-2a antibody; arb.c.(proc.) = ?  
NPU21769 P—HNA-3a antibody; arb.c.(proc.) = ?  
NPU21770 P—HNA-4a antibody; arb.c.(proc.) = ?  
NPU21771 P—HNA-5a antibody; arb.c.(proc.) = ?

**Plasma—**  
**HNA antibody;**  
**arbitrary concentration(procedure)**  
**NPU21919**  
P—HNA antibody; arb.c.(proc.) = ?

**Plasma—**  
**HNA antibody;**  
**arbitrary substance concentration(procedure)**  
**arbitrary unit/litre**  
**NPU21925**  
P—HNA antibody; arb.subst.c.(proc.) = ? arb.unit/l

**Plasma—**  
**HNA antibody;**  
**taxon**  
**NPU21921**  
P—HNA antibody; taxon = ?

**Neutrophilocytes(Blood)—**  
**HNA antigen;**  
**arbitrary number(list; procedure)**  
**NPU21772**  
Ntrcs(B)—HNA antigen; arb.num.(list; proc.) = ?  
NPU21773 Ntrcs(B)—HNA-1a antigen; arb.num.(proc.) = ?  
NPU21774 Ntrcs(B)—HNA-1b antigen; arb.num.(proc.) = ?  
NPU21775 Ntrcs(B)—HNA-1c antigen; arb.num.(proc.) = ?  
NPU21776 Ntrcs(B)—HNA-2a antigen; arb.num.(proc.) = ?  
NPU21777 Ntrcs(B)—HNA-3a antigen; arb.num.(proc.) = ?  
NPU21778 Ntrcs(B)—HNA-4a antigen; arb.num.(proc.) = ?  
NPU21779 Ntrcs(B)—HNA-5a antigen; arb.num.(proc.) = ?

**Neutrophilocytes(Blood)—**  
**HNA antigen;**  
**taxon**  
**NPU21920**  
Ntrcs(B)—HNA antigen; taxon = ?

**Plasma—**  
**HNA-1a antibody(Immunoglobulin A);**  
**arbitrary concentration(procedure)**  
**NPU21979**  
P—HNA-1a antibody(IgA); arb.c.(proc.) = ?

**Plasma—**  
**HNA-1a antibody(Immunoglobulin A);**  
**arbitrary substance concentration(procedure)**  
**arbitrary unit/litre**  
**NPU21986**  
P—HNA-1a antibody(IgA); arb.subst.c.(proc.) = ? arb.unit/l

**Plasma—**  
**HNA-1a antibody(Immunoglobulin G);**  
**arbitrary concentration(procedure)**  
**NPU21963**  
P—HNA-1a antibody(IgG); arb.c.(proc.) = ?

**Plasma—**  
**HNA-1a antibody(Immunoglobulin G);**  
**arbitrary substance concentration(procedure)**  
**arbitrary unit/litre**  
**NPU21987**  
P—HNA-1a antibody(IgG); arb.subst.c.(proc.) = ? arb.unit/l

**Plasma—**  
HNA-1a antibody(Immunoglobulin M);  
arbitrary concentration(procedure)  
NPU21971  
P—HNA-1a antibody(IgM); arb.c.(proc.) = ?

**Plasma—**  
HNA-1a antibody(Immunoglobulin M);  
arbitrary substance concentration(procedure)  
arbitrary unit/litre  
NPU21988  
P—HNA-1a antibody(IgM); arb.subst.c.(proc.) = ? arb.unit/l

**Plasma—**  
HNA-1a antibody;  
arbitrary concentration(procedure)  
NPU21765  
P—HNA-1a antibody; arb.c.(proc.) = ?

**Plasma—**  
HNA-1a antibody;  
arbitrary substance concentration(procedure)  
arbitrary unit/litre  
NPU21989  
P—HNA-1a antibody; arb.subst.c.(proc.) = ? arb.unit/l

**Neutrophilocytes(Blood)—**  
HNA-1a antigen;  
arbitrary number(procedure)  
NPU21773  
Ntrcs(B)—HNA-1a antigen; arb.num.(proc.) = ?

**Plasma—**  
HNA-1b antibody(Immunoglobulin A);  
arbitrary concentration(procedure)  
NPU21980  
P—HNA-1b antibody(IgA); arb.c.(proc.) = ?

**Plasma—**  
HNA-1b antibody(Immunoglobulin A);  
arbitrary substance concentration(procedure)  
arbitrary unit/litre  
NPU21990  
P—HNA-1b antibody(IgA); arb.subst.c.(proc.) = ? arb.unit/l

**Plasma—**  
HNA-1b antibody(Immunoglobulin G);  
arbitrary concentration(procedure)  
NPU21964  
P—HNA-1b antibody(IgG); arb.c.(proc.) = ?

**Plasma—**  
HNA-1b antibody(Immunoglobulin G);  
arbitrary substance concentration(procedure)  
arbitrary unit/litre  
NPU21991  
P—HNA-1b antibody(IgG); arb.subst.c.(proc.) = ? arb.unit/l

**Plasma—**  
HNA-1b antibody(Immunoglobulin M);  
arbitrary concentration(procedure)  
NPU21972  
P—HNA-1b antibody(IgM); arb.c.(proc.) = ?

**Plasma—**  
HNA-1b antibody(Immunoglobulin M);  
arbitrary substance concentration(procedure)  
arbitrary unit/litre  
NPU21992  
P—HNA-1b antibody(IgM); arb.subst.c.(proc.) = ? arb.unit/l

**Plasma—**  
HNA-1b antibody;  
arbitrary concentration(procedure)  
NPU21766  
P—HNA-1b antibody; arb.c.(proc.) = ?

**Plasma—**  
HNA-1b antibody;  
arbitrary substance concentration(procedure)  
arbitrary unit/litre  
NPU21993  
P—HNA-1b antibody; arb.subst.c.(proc.) = ? arb.unit/l

**Neutrophilocytes(Blood)—**  
HNA-1b antigen;  
arbitrary number(procedure)  
NPU21774  
Ntrcs(B)—HNA-1b antigen; arb.num.(proc.) = ?

**Plasma—**  
HNA-1c antibody(Immunoglobulin A);  
arbitrary concentration(procedure)  
NPU21981  
P—HNA-1c antibody(IgA); arb.c.(proc.) = ?

**Plasma—**  
HNA-1c antibody(Immunoglobulin A);  
arbitrary substance concentration(procedure)  
arbitrary unit/litre  
NPU21998  
P—HNA-1c antibody(IgA); arb.subst.c.(proc.) = ? arb.unit/l

**Plasma—**  
HNA-1c antibody(Immunoglobulin G);  
arbitrary concentration(procedure)  
NPU21965  
P—HNA-1c antibody(IgG); arb.c.(proc.) = ?

**Plasma—**  
HNA-1c antibody(Immunoglobulin G);  
arbitrary substance concentration(procedure)  
arbitrary unit/litre  
NPU21999  
P—HNA-1c antibody(IgG); arb.subst.c.(proc.) = ? arb.unit/l

**Plasma—**  
HNA-1c antibody(Immunoglobulin M);  
arbitrary concentration(procedure)  
NPU21973  
P—HNA-1c antibody(IgM); arb.c.(proc.) = ?

**Plasma—**  
HNA-1c antibody(Immunoglobulin M);  
arbitrary substance concentration(procedure)  
arbitrary unit/litre  
NPU22000  
P—HNA-1c antibody(IgM); arb.subst.c.(proc.) = ? arb.unit/l

**Plasma—**  
HNA-1c antibody;  
arbitrary concentration(procedure)  
NPU21767  
P—HNA-1c antibody; arb.c.(proc.) = ?

**Plasma—**  
HNA-1c antibody;  
arbitrary substance concentration(procedure)  
arbitrary unit/litre  
NPU22001  
P—HNA-1c antibody; arb.subst.c.(proc.) = ? arb.unit/l

**Neutrophilocytes(Blood)—**  
HNA-1c antigen;  
arbitrary number(procedure)  
NPU21775  
Ntrcs(B)—HNA-1c antigen; arb.num.(proc.) = ?

**Plasma—**  
HNA-2a antibody(Immunoglobulin A);  
arbitrary concentration(procedure)  
NPU21982  
P—HNA-2a antibody(IgA); arb.c.(proc.) = ?

**Plasma—**  
**HNA-2a antibody(Immunoglobulin A);**  
**arbitrary substance concentration(procedure)**  
**arbitrary unit/litre**  
**NPU21994**  
P—HNA-2a antibody(IgA); arb.subst.c.(proc.) = ? arb.unit/l

**Plasma—**  
**HNA-2a antibody(Immunoglobulin G);**  
**arbitrary concentration(procedure)**  
**NPU21966**  
P—HNA-2a antibody(IgG); arb.c.(proc.) = ?

**Plasma—**  
**HNA-2a antibody(Immunoglobulin G);**  
**arbitrary substance concentration(procedure)**  
**arbitrary unit/litre**  
**NPU21995**  
P—HNA-2a antibody(IgG); arb.subst.c.(proc.) = ? arb.unit/l

**Plasma—**  
**HNA-2a antibody(Immunoglobulin M);**  
**arbitrary concentration(procedure)**  
**NPU21974**  
P—HNA-2a antibody(IgM); arb.c.(proc.) = ?

**Plasma—**  
**HNA-2a antibody(Immunoglobulin M);**  
**arbitrary substance concentration(procedure)**  
**arbitrary unit/litre**  
**NPU21996**  
P—HNA-2a antibody(IgM); arb.subst.c.(proc.) = ? arb.unit/l

**Plasma—**  
**HNA-2a antibody;**  
**arbitrary concentration(procedure)**  
**NPU21768**  
P—HNA-2a antibody; arb.c.(proc.) = ?

**Plasma—**  
**HNA-2a antibody;**  
**arbitrary substance concentration(procedure)**  
**arbitrary unit/litre**  
**NPU21997**  
P—HNA-2a antibody; arb.subst.c.(proc.) = ? arb.unit/l

**Neutrophilocytes(Blood)—**  
**HNA-2a antigen;**  
**arbitrary number(procedure)**  
**NPU21776**  
Ntrcs(B)—HNA-2a antigen; arb.num.(proc.) = ?

**Plasma—**  
**HNA-3a antibody(Immunoglobulin A);**  
**arbitrary concentration(procedure)**  
**NPU21983**  
P—HNA-3a antibody(IgA); arb.c.(proc.) = ?

**Plasma—**  
**HNA-3a antibody(Immunoglobulin A);**  
**arbitrary substance concentration(procedure)**  
**arbitrary unit/litre**  
**NPU22002**  
P—HNA-3a antibody(IgA); arb.subst.c.(proc.) = ? arb.unit/l

**Plasma—**  
**HNA-3a antibody(Immunoglobulin G);**  
**arbitrary concentration(procedure)**  
**NPU21967**  
P—HNA-3a antibody(IgG); arb.c.(proc.) = ?

**Plasma—**  
**HNA-3a antibody(Immunoglobulin G);**  
**arbitrary substance concentration(procedure)**  
**arbitrary unit/litre**  
**NPU22003**  
P—HNA-3a antibody(IgG); arb.subst.c.(proc.) = ? arb.unit/l

**Plasma—**  
**HNA-3a antibody(Immunoglobulin M);**  
**arbitrary concentration(procedure)**  
**NPU21975**  
P—HNA-3a antibody(IgM); arb.c.(proc.) = ?

**Plasma—**  
**HNA-3a antibody(Immunoglobulin M);**  
**arbitrary substance concentration(procedure)**  
**arbitrary unit/litre**  
**NPU22004**  
P—HNA-3a antibody(IgM); arb.subst.c.(proc.) = ? arb.unit/l

**Plasma—**  
**HNA-3a antibody;**  
**arbitrary concentration(procedure)**  
**NPU21769**  
P—HNA-3a antibody; arb.c.(proc.) = ?

**Plasma—**  
**HNA-3a antibody;**  
**arbitrary substance concentration(procedure)**  
**arbitrary unit/litre**  
**NPU22005**  
P—HNA-3a antibody; arb.subst.c.(proc.) = ? arb.unit/l

**Neutrophilocytes(Blood)—**  
**HNA-3a antigen;**  
**arbitrary number(procedure)**  
**NPU21777**  
Ntrcs(B)—HNA-3a antigen; arb.num.(proc.) = ?

**Plasma—**  
**HNA-4a antibody(Immunoglobulin A);**  
**arbitrary concentration(procedure)**  
**NPU21984**  
P—HNA-4a antibody(IgA); arb.c.(proc.) = ?

**Plasma—**  
**HNA-4a antibody(Immunoglobulin A);**  
**arbitrary substance concentration(procedure)**  
**arbitrary unit/litre**  
**NPU22006**  
P—HNA-4a antibody(IgA); arb.subst.c.(proc.) = ? arb.unit/l

**Plasma—**  
**HNA-4a antibody(Immunoglobulin G);**  
**arbitrary concentration(procedure)**  
**NPU21968**  
P—HNA-4a antibody(IgG); arb.c.(proc.) = ?

**Plasma—**  
**HNA-4a antibody(Immunoglobulin G);**  
**arbitrary substance concentration(procedure)**  
**arbitrary unit/litre**  
**NPU22007**  
P—HNA-4a antibody(IgG); arb.subst.c.(proc.) = ? arb.unit/l

**Plasma—**  
**HNA-4a antibody(Immunoglobulin M);**  
**arbitrary concentration(procedure)**  
**NPU21976**  
P—HNA-4a antibody(IgM); arb.c.(proc.) = ?

**Plasma—**  
**HNA-4a antibody(Immunoglobulin M);**  
**arbitrary substance concentration(procedure)**  
**arbitrary unit/litre**  
**NPU22008**  
P—HNA-4a antibody(IgM); arb.subst.c.(proc.) = ? arb.unit/l

**Plasma—**  
**HNA-4a antibody;**  
**arbitrary concentration(procedure)**  
**NPU21770**  
P—HNA-4a antibody; arb.c.(proc.) = ?

**Plasma—**  
**HNA-4a antibody;**  
**arbitrary substance concentration(procedure)**  
**arbitrary unit/litre**  
**NPU22009**  
P—HNA-4a antibody; arb.subst.c.(proc.) = ? arb.unit/l

**Neutrophilocytes(Blood)—**  
**HNA-4a antigen;**  
**arbitrary number(procedure)**  
**NPU21778**  
Ntrcs(B)—HNA-4a antigen; arb.num.(proc.) = ?

**Plasma—**  
**HNA-5a antibody(Immunoglobulin A);**  
**arbitrary concentration(procedure)**  
**NPU21985**  
P—HNA-5a antibody(IgA); arb.c.(proc.) = ?

**Plasma—**  
**HNA-5a antibody(Immunoglobulin A);**  
**arbitrary substance concentration(procedure)**  
**arbitrary unit/litre**  
**NPU22010**  
P—HNA-5a antibody(IgA); arb.subst.c.(proc.) = ? arb.unit/l

**Plasma—**  
**HNA-5a antibody(Immunoglobulin G);**  
**arbitrary concentration(procedure)**  
**NPU21969**  
P—HNA-5a antibody(IgG); arb.c.(proc.) = ?

**Plasma—**  
**HNA-5a antibody(Immunoglobulin G);**  
**arbitrary substance concentration(procedure)**  
**arbitrary unit/litre**  
**NPU22011**  
P—HNA-5a antibody(IgG); arb.subst.c.(proc.) = ? arb.unit/l

**Plasma—**  
**HNA-5a antibody(Immunoglobulin M);**  
**arbitrary concentration(procedure)**  
**NPU21977**  
P—HNA-5a antibody(IgM); arb.c.(proc.) = ?

**Plasma—**  
**HNA-5a antibody(Immunoglobulin M);**  
**arbitrary substance concentration(procedure)**  
**arbitrary unit/litre**  
**NPU22012**  
P—HNA-5a antibody(IgM); arb.subst.c.(proc.) = ? arb.unit/l

**Plasma—**  
**HNA-5a antibody;**  
**arbitrary concentration(procedure)**  
**NPU21771**  
P—HNA-5a antibody; arb.c.(proc.) = ?

**Plasma—**  
**HNA-5a antibody;**  
**arbitrary substance concentration(procedure)**  
**arbitrary unit/litre**  
**NPU22013**  
P—HNA-5a antibody; arb.subst.c.(proc.) = ? arb.unit/l

**Neutrophilocytes(Blood)—**  
**HNA-5a antigen;**  
**arbitrary number(procedure)**  
**NPU21779**  
Ntrcs(B)—HNA-5a antigen; arb.num.(proc.) = ?

**Plasma—**  
**HPA antibody(Immunoglobulin A);**  
**arbitrary concentration(list; procedure)**  
**NPU21460**  
P—HPA antibody(IgA); arb.c.(list; proc.) = ?  
NPU21461 P—HPA-1a antibody(IgA); arb.c.(proc.) = ?  
NPU21462 P—HPA-1b antibody(IgA); arb.c.(proc.) = ?  
NPU21463 P—HPA-2a antibody(IgA); arb.c.(proc.) = ?  
NPU21464 P—HPA-2b antibody(IgA); arb.c.(proc.) = ?  
NPU21465 P—HPA-3a antibody(IgA); arb.c.(proc.) = ?  
NPU21466 P—HPA-3b antibody(IgA); arb.c.(proc.) = ?  
NPU21467 P—HPA-4a antibody(IgA); arb.c.(proc.) = ?  
NPU21468 P—HPA-4b antibody(IgA); arb.c.(proc.) = ?  
NPU21469 P—HPA-5a antibody(IgA); arb.c.(proc.) = ?  
NPU21470 P—HPA-5b antibody(IgA); arb.c.(proc.) = ?  
NPU21471 P—HPA-6b antibody(IgA); arb.c.(proc.) = ?  
NPU21893 P—HPA-7b antibody(IgA); arb.c.(proc.) = ?  
NPU21894 P—HPA-8b antibody(IgA); arb.c.(proc.) = ?  
NPU21895 P—HPA-9b antibody(IgA); arb.c.(proc.) = ?  
NPU21896 P—HPA-10b antibody(IgA); arb.c.(proc.) = ?  
NPU21472 P—HPA-unknown antibody(IgA); arb.c.(proc.) = ?

**Plasma—**  
**HPA antibody(Immunoglobulin A);**  
**taxon**  
**NPU21872**  
P—HPA antibody(IgA); taxon = ?

**Plasma—**  
**HPA antibody(Immunoglobulin G);**  
**arbitrary concentration(list; procedure)**  
**NPU21447**  
P—HPA antibody(IgG); arb.c.(list; proc.) = ?  
NPU21448 P—HPA-1a antibody(IgG); arb.c.(proc.) = ?  
NPU21449 P—HPA-1b antibody(IgG); arb.c.(proc.) = ?  
NPU21450 P—HPA-2a antibody(IgG); arb.c.(proc.) = ?  
NPU21451 P—HPA-2b antibody(IgG); arb.c.(proc.) = ?  
NPU21452 P—HPA-3a antibody(IgG); arb.c.(proc.) = ?  
NPU21453 P—HPA-3b antibody(IgG); arb.c.(proc.) = ?  
NPU21454 P—HPA-4a antibody(IgG); arb.c.(proc.) = ?  
NPU21455 P—HPA-4b antibody(IgG); arb.c.(proc.) = ?  
NPU21456 P—HPA-5a antibody(IgG); arb.c.(proc.) = ?  
NPU21457 P—HPA-5b antibody(IgG); arb.c.(proc.) = ?  
NPU21458 P—HPA-6b antibody(IgG); arb.c.(proc.) = ?  
NPU21889 P—HPA-7b antibody(IgG); arb.c.(proc.) = ?  
NPU21890 P—HPA-8b antibody(IgG); arb.c.(proc.) = ?  
NPU21891 P—HPA-9b antibody(IgG); arb.c.(proc.) = ?  
NPU21892 P—HPA-10b antibody(IgG); arb.c.(proc.) = ?  
NPU21459 P—HPA-unknown antibody(IgG); arb.c.(proc.) = ?

**Plasma—**  
**HPA antibody(Immunoglobulin G);**  
**taxon**  
**NPU21871**  
P—HPA antibody(IgG); taxon = ?

**Plasma—**  
**HPA antibody(Immunoglobulin M);**  
**arbitrary concentration(list; procedure)**  
**NPU21473**  
P—HPA antibody(IgM); arb.c.(list; proc.) = ?  
NPU21474 P—HPA-1a antibody(IgM); arb.c.(proc.) = ?  
NPU21475 P—HPA-1b antibody(IgM); arb.c.(proc.) = ?  
NPU21476 P—HPA-2a antibody(IgM); arb.c.(proc.) = ?  
NPU21477 P—HPA-2b antibody(IgM); arb.c.(proc.) = ?  
NPU21478 P—HPA-3a antibody(IgM); arb.c.(proc.) = ?  
NPU21479 P—HPA-3b antibody(IgM); arb.c.(proc.) = ?  
NPU21480 P—HPA-4a antibody(IgM); arb.c.(proc.) = ?  
NPU21481 P—HPA-4b antibody(IgM); arb.c.(proc.) = ?  
NPU21482 P—HPA-5a antibody(IgM); arb.c.(proc.) = ?  
NPU21483 P—HPA-5b antibody(IgM); arb.c.(proc.) = ?  
NPU21484 P—HPA-6b antibody(IgM); arb.c.(proc.) = ?  
NPU21897 P—HPA-7b antibody(IgM); arb.c.(proc.) = ?  
NPU21898 P—HPA-8b antibody(IgM); arb.c.(proc.) = ?  
NPU21899 P—HPA-9b antibody(IgM); arb.c.(proc.) = ?  
NPU21900 P—HPA-10b antibody(IgM); arb.c.(proc.) = ?  
NPU21485 P—HPA-unknown antibody(IgM); arb.c.(proc.) = ?

**Plasma—**  
**HPA antibody(Immunoglobulin M);**  
**taxon**  
**NPU21873**  
P—HPA antibody(IgM); taxon = ?

**Plasma—**  
**HPA antibody;**  
**arbitrary concentration(list; procedure)**  
**NPU21328**  
P—HPA antibody; arb.c.(list; proc.) = ?  
NPU21329 P—HPA-1a antibody; arb.c.(proc.) = ?  
NPU21330 P—HPA-1b antibody; arb.c.(proc.) = ?  
NPU21331 P—HPA-2a antibody; arb.c.(proc.) = ?  
NPU21332 P—HPA-2b antibody; arb.c.(proc.) = ?  
NPU21333 P—HPA-3a antibody; arb.c.(proc.) = ?  
NPU21334 P—HPA-3b antibody; arb.c.(proc.) = ?  
NPU21335 P—HPA-4a antibody; arb.c.(proc.) = ?  
NPU21336 P—HPA-4b antibody; arb.c.(proc.) = ?  
NPU21337 P—HPA-5a antibody; arb.c.(proc.) = ?  
NPU21338 P—HPA-5b antibody; arb.c.(proc.) = ?  
NPU21339 P—HPA-6b antibody; arb.c.(proc.) = ?  
NPU21881 P—HPA-7b antibody; arb.c.(proc.) = ?  
NPU21882 P—HPA-8b antibody; arb.c.(proc.) = ?  
NPU21883 P—HPA-9b antibody; arb.c.(proc.) = ?  
NPU21884 P—HPA-10b antibody; arb.c.(proc.) = ?  
NPU21340 P—HPA-unknown antibody; arb.c.(proc.) = ?

**Plasma—**  
**HPA antibody;**  
**arbitrary concentration(procedure)**  
**NPU21327**  
P—HPA antibody; arb.c.(proc.) = ?

**Plasma—**  
**HPA antibody;**  
**arbitrary substance concentration(procedure)**  
**arbitrary unit/litre**  
Other term(s): Thrombocyte specific alloantibody; Thrombocyte autoantibody. Other term(s): Platelet(s) is a full synonym to Thrombocyte(s)  
Authority: Isth/SSC93  
**NPU03564**  
P—HPA antibody; arb.subst.c.(proc.) = ? arb.unit/l

**Plasma—**  
**HPA antibody;**  
**compatibility(donationID; absent present)**  
**NPU21425**  
P—HPA antibody; compatibility(donationID; absent present) = ?

**Plasma—**  
**HPA antibody;**  
**taxon**  
**NPU21870**  
P—HPA antibody; taxon = ?

**Thrombocytes(Blood)—**  
**HPA antigen;**  
**arbitrary number(list; procedure)**  
**NPU21341**  
Trcs(B)—HPA antigen; arb.num.(list; proc.) = ?  
NPU21342 Trcs(B)—HPA-1a antigen; arb.num.(proc.) = ?  
NPU21343 Trcs(B)—HPA-1b antigen; arb.num.(proc.) = ?  
NPU21344 Trcs(B)—HPA-2a antigen; arb.num.(proc.) = ?  
NPU21345 Trcs(B)—HPA-2b antigen; arb.num.(proc.) = ?  
NPU21346 Trcs(B)—HPA-3a antigen; arb.num.(proc.) = ?  
NPU21347 Trcs(B)—HPA-3b antigen; arb.num.(proc.) = ?  
NPU21348 Trcs(B)—HPA-4a antigen; arb.num.(proc.) = ?  
NPU21349 Trcs(B)—HPA-4b antigen; arb.num.(proc.) = ?  
NPU21350 Trcs(B)—HPA-5a antigen; arb.num.(proc.) = ?  
NPU21351 Trcs(B)—HPA-5b antigen; arb.num.(proc.) = ?  
NPU21352 Trcs(B)—HPA-6b antigen; arb.num.(proc.) = ?  
NPU21353 Trcs(B)—HPA-7b antigen; arb.num.(proc.) = ?  
NPU21865 Trcs(B)—HPA-8b antigen; arb.num.(proc.) = ?  
NPU21866 Trcs(B)—HPA-9b antigen; arb.num.(proc.) = ?  
NPU21867 Trcs(B)—HPA-10b antigen; arb.num.(proc.) = ?

**Thrombocytes(Blood)—**  
**HPA antigen;**  
**taxon**  
**NPU21869**  
Trcs(B)—HPA antigen; taxon = ?

**Plasma—**  
**HPA-10b antibody(Immunoglobulin A);**  
**arbitrary concentration(procedure)**  
**NPU21896**  
P—HPA-10b antibody(IgA); arb.c.(proc.) = ?

**Plasma—**  
**HPA-10b antibody(Immunoglobulin A);**  
**arbitrary substance concentration(procedure)**  
**arbitrary unit/litre**  
**NPU21908**  
P—HPA-10b antibody(IgA); arb.subst.c.(proc.) = ? arb.unit/l

**Plasma—**  
**HPA-10b antibody(Immunoglobulin G);**  
**arbitrary concentration(procedure)**  
**NPU21892**  
P—HPA-10b antibody(IgG); arb.c.(proc.) = ?

**Plasma—**  
**HPA-10b antibody(Immunoglobulin G);**  
**arbitrary substance concentration(procedure)**  
**arbitrary unit/litre**  
**NPU21904**  
P—HPA-10b antibody(IgG); arb.subst.c.(proc.) = ? arb.unit/l

**Plasma—**  
**HPA-10b antibody(Immunoglobulin M);**  
**arbitrary concentration(procedure)**  
**NPU21900**  
P—HPA-10b antibody(IgM); arb.c.(proc.) = ?

**Plasma—**  
**HPA-10b antibody(Immunoglobulin M);**  
**arbitrary substance concentration(procedure)**  
**arbitrary unit/litre**  
**NPU21912**  
P—HPA-10b antibody(IgM); arb.subst.c.(proc.) = ? arb.unit/l

**Plasma—**  
**HPA-10b antibody;**  
**arbitrary concentration(procedure)**  
**NPU21884**  
P—HPA-10b antibody; arb.c.(proc.) = ?

**Plasma—**  
**HPA-10b antibody;**  
arbitrary substance concentration(procedure)  
arbitrary unit/litre  
**NPU21888**  
P—HPA-10b antibody; arb.subst.c.(proc.) = ? arb.unit/l

**Thrombocytes(Blood)—**  
**HPA-10b antigen;**  
arbitrary number(procedure)  
**NPU21867**  
Trcs(B)—HPA-10b antigen; arb.num.(proc.) = ?

**Plasma—**  
**HPA-1a antibody(Immunoglobulin A);**  
arbitrary concentration(procedure)  
**NPU21461**  
P—HPA-1a antibody(IgA); arb.c.(proc.) = ?

**Plasma—**  
**HPA-1a antibody(Immunoglobulin A);**  
arbitrary substance concentration(procedure)  
arbitrary unit/litre  
**NPU21498**  
P—HPA-1a antibody(IgA); arb.subst.c.(proc.) = ? arb.unit/l

**Plasma—**  
**HPA-1a antibody(Immunoglobulin G);**  
arbitrary concentration(procedure)  
**NPU21448**  
P—HPA-1a antibody(IgG); arb.c.(proc.) = ?

**Plasma—**  
**HPA-1a antibody(Immunoglobulin G);**  
arbitrary substance concentration(procedure)  
arbitrary unit/litre  
**NPU21486**  
P—HPA-1a antibody(IgG); arb.subst.c.(proc.) = ? arb.unit/l

**Plasma—**  
**HPA-1a antibody(Immunoglobulin M);**  
arbitrary concentration(procedure)  
**NPU21474**  
P—HPA-1a antibody(IgM); arb.c.(proc.) = ?

**Plasma—**  
**HPA-1a antibody(Immunoglobulin M);**  
arbitrary substance concentration(procedure)  
arbitrary unit/litre  
**NPU21510**  
P—HPA-1a antibody(IgM); arb.subst.c.(proc.) = ? arb.unit/l

**Plasma—**  
**HPA-1a antibody;**  
arbitrary concentration(procedure)  
**NPU21329**  
P—HPA-1a antibody; arb.c.(proc.) = ?

**Plasma—**  
**HPA-1a antibody;**  
arbitrary substance concentration(procedure)  
arbitrary unit/litre  
**NPU21435**  
P—HPA-1a antibody; arb.subst.c.(proc.) = ? arb.unit/l

**Thrombocytes(Blood)—**  
**HPA-1a antigen;**  
arbitrary number(procedure)  
**NPU21342**  
Trcs(B)—HPA-1a antigen; arb.num.(proc.) = ?

**Plasma—**  
**HPA-1b antibody(Immunoglobulin A);**  
arbitrary concentration(procedure)  
**NPU21462**  
P—HPA-1b antibody(IgA); arb.c.(proc.) = ?

**Plasma—**  
**HPA-1b antibody(Immunoglobulin A);**  
arbitrary substance concentration(procedure)  
arbitrary unit/litre  
**NPU21499**  
P—HPA-1b antibody(IgA); arb.subst.c.(proc.) = ? arb.unit/l

**Plasma—**  
**HPA-1b antibody(Immunoglobulin G);**  
arbitrary concentration(procedure)  
**NPU21449**  
P—HPA-1b antibody(IgG); arb.c.(proc.) = ?

**Plasma—**  
**HPA-1b antibody(Immunoglobulin G);**  
arbitrary substance concentration(procedure)  
arbitrary unit/litre  
**NPU21487**  
P—HPA-1b antibody(IgG); arb.subst.c.(proc.) = ? arb.unit/l

**Plasma—**  
**HPA-1b antibody(Immunoglobulin M);**  
arbitrary concentration(procedure)  
**NPU21475**  
P—HPA-1b antibody(IgM); arb.c.(proc.) = ?

**Plasma—**  
**HPA-1b antibody(Immunoglobulin M);**  
arbitrary substance concentration(procedure)  
arbitrary unit/litre  
**NPU21511**  
P—HPA-1b antibody(IgM); arb.subst.c.(proc.) = ? arb.unit/l

**Plasma—**  
**HPA-1b antibody;**  
arbitrary concentration(procedure)  
**NPU21330**  
P—HPA-1b antibody; arb.c.(proc.) = ?

**Plasma—**  
**HPA-1b antibody;**  
arbitrary substance concentration(procedure)  
arbitrary unit/litre  
**NPU21436**  
P—HPA-1b antibody; arb.subst.c.(proc.) = ? arb.unit/l

**Thrombocytes(Blood)—**  
**HPA-1b antigen;**  
arbitrary number(procedure)  
**NPU21343**  
Trcs(B)—HPA-1b antigen; arb.num.(proc.) = ?

**Plasma—**  
**HPA-2a antibody(Immunoglobulin A);**  
arbitrary concentration(procedure)  
**NPU21463**  
P—HPA-2a antibody(IgA); arb.c.(proc.) = ?

**Plasma—**  
**HPA-2a antibody(Immunoglobulin A);**  
arbitrary substance concentration(procedure)  
arbitrary unit/litre  
**NPU21500**  
P—HPA-2a antibody(IgA); arb.subst.c.(proc.) = ? arb.unit/l

**Plasma—**  
**HPA-2a antibody(Immunoglobulin G);**  
arbitrary concentration(procedure)  
**NPU21450**  
P—HPA-2a antibody(IgG); arb.c.(proc.) = ?

**Plasma—**  
**HPA-2a antibody(Immunoglobulin G);**  
arbitrary substance concentration(procedure)  
arbitrary unit/litre  
**NPU21488**  
P—HPA-2a antibody(IgG); arb.subst.c.(proc.) = ? arb.unit/l

**Plasma—**  
**HPA-2a antibody(Immunoglobulin M);**  
**arbitrary concentration(procedure)**  
**NPU21476**  
P—HPA-2a antibody(IgM); arb.c.(proc.) = ?

**Plasma—**  
**HPA-2a antibody(Immunoglobulin M);**  
**arbitrary substance concentration(procedure)**  
**arbitrary unit/litre**  
**NPU21512**  
P—HPA-2a antibody(IgM); arb.subst.c.(proc.) = ? arb.unit/l

**Plasma—**  
**HPA-2a antibody;**  
**arbitrary concentration(procedure)**  
**NPU21331**  
P—HPA-2a antibody; arb.c.(proc.) = ?

**Plasma—**  
**HPA-2a antibody;**  
**arbitrary substance concentration(procedure)**  
**arbitrary unit/litre**  
**NPU21437**  
P—HPA-2a antibody; arb.subst.c.(proc.) = ? arb.unit/l

**Thrombocytes(Blood)—**  
**HPA-2a antigen;**  
**arbitrary number(procedure)**  
**NPU21344**  
Trcs(B)—HPA-2a antigen; arb.num.(proc.) = ?

**Plasma—**  
**HPA-2b antibody(Immunoglobulin A);**  
**arbitrary concentration(procedure)**  
**NPU21464**  
P—HPA-2b antibody(IgA); arb.c.(proc.) = ?

**Plasma—**  
**HPA-2b antibody(Immunoglobulin A);**  
**arbitrary substance concentration(procedure)**  
**arbitrary unit/litre**  
**NPU21501**  
P—HPA-2b antibody(IgA); arb.subst.c.(proc.) = ? arb.unit/l

**Plasma—**  
**HPA-2b antibody(Immunoglobulin G);**  
**arbitrary concentration(procedure)**  
**NPU21451**  
P—HPA-2b antibody(IgG); arb.c.(proc.) = ?

**Plasma—**  
**HPA-2b antibody(Immunoglobulin G);**  
**arbitrary substance concentration(procedure)**  
**arbitrary unit/litre**  
**NPU21489**  
P—HPA-2b antibody(IgG); arb.subst.c.(proc.) = ? arb.unit/l

**Plasma—**  
**HPA-2b antibody(Immunoglobulin M);**  
**arbitrary concentration(procedure)**  
**NPU21477**  
P—HPA-2b antibody(IgM); arb.c.(proc.) = ?

**Plasma—**  
**HPA-2b antibody(Immunoglobulin M);**  
**arbitrary substance concentration(procedure)**  
**arbitrary unit/litre**  
**NPU21513**  
P—HPA-2b antibody(IgM); arb.subst.c.(proc.) = ? arb.unit/l

**Plasma—**  
**HPA-2b antibody;**  
**arbitrary concentration(procedure)**  
**NPU21332**  
P—HPA-2b antibody; arb.c.(proc.) = ?

**Plasma—**  
**HPA-2b antibody;**  
**arbitrary substance concentration(procedure)**  
**arbitrary unit/litre**  
**NPU21438**  
P—HPA-2b antibody; arb.subst.c.(proc.) = ? arb.unit/l

**Thrombocytes(Blood)—**  
**HPA-2b antigen;**  
**arbitrary number(procedure)**  
**NPU21345**  
Trcs(B)—HPA-2b antigen; arb.num.(proc.) = ?

**Plasma—**  
**HPA-3a antibody(Immunoglobulin A);**  
**arbitrary concentration(procedure)**  
**NPU21465**  
P—HPA-3a antibody(IgA); arb.c.(proc.) = ?

**Plasma—**  
**HPA-3a antibody(Immunoglobulin A);**  
**arbitrary substance concentration(procedure)**  
**arbitrary unit/litre**  
**NPU21502**  
P—HPA-3a antibody(IgA); arb.subst.c.(proc.) = ? arb.unit/l

**Plasma—**  
**HPA-3a antibody(Immunoglobulin G);**  
**arbitrary concentration(procedure)**  
**NPU21452**  
P—HPA-3a antibody(IgG); arb.c.(proc.) = ?

**Plasma—**  
**HPA-3a antibody(Immunoglobulin G);**  
**arbitrary substance concentration(procedure)**  
**arbitrary unit/litre**  
**NPU21490**  
P—HPA-3a antibody(IgG); arb.subst.c.(proc.) = ? arb.unit/l

**Plasma—**  
**HPA-3a antibody(Immunoglobulin M);**  
**arbitrary concentration(procedure)**  
**NPU21478**  
P—HPA-3a antibody(IgM); arb.c.(proc.) = ?

**Plasma—**  
**HPA-3a antibody(Immunoglobulin M);**  
**arbitrary substance concentration(procedure)**  
**arbitrary unit/litre**  
**NPU21514**  
P—HPA-3a antibody(IgM); arb.subst.c.(proc.) = ? arb.unit/l

**Plasma—**  
**HPA-3a antibody;**  
**arbitrary concentration(procedure)**  
**NPU21333**  
P—HPA-3a antibody; arb.c.(proc.) = ?

**Plasma—**  
**HPA-3a antibody;**  
**arbitrary substance concentration(procedure)**  
**arbitrary unit/litre**  
**NPU21439**  
P—HPA-3a antibody; arb.subst.c.(proc.) = ? arb.unit/l

**Thrombocytes(Blood)—**  
**HPA-3a antigen;**  
**arbitrary number(procedure)**  
**NPU21346**  
Trcs(B)—HPA-3a antigen; arb.num.(proc.) = ?

**Plasma—**  
**HPA-3b antibody(Immunoglobulin A);**  
**arbitrary concentration(procedure)**  
**NPU21466**  
P—HPA-3b antibody(IgA); arb.c.(proc.) = ?

**Plasma—**  
**HPA-3b antibody(Immunoglobulin A);**  
**arbitrary substance concentration(procedure)**  
**arbitrary unit/litre**  
**NPU21503**  
P—HPA-3b antibody(IgA); arb.subst.c.(proc.) = ? arb.unit/l

**Plasma—**  
**HPA-3b antibody(Immunoglobulin G);**  
**arbitrary concentration(procedure)**  
**NPU21453**  
P—HPA-3b antibody(IgG); arb.c.(proc.) = ?

**Plasma—**  
**HPA-3b antibody(Immunoglobulin G);**  
**arbitrary substance concentration(procedure)**  
**arbitrary unit/litre**  
**NPU21491**  
P—HPA-3b antibody(IgG); arb.subst.c.(proc.) = ? arb.unit/l

**Plasma—**  
**HPA-3b antibody(Immunoglobulin M);**  
**arbitrary concentration(procedure)**  
**NPU21479**  
P—HPA-3b antibody(IgM); arb.c.(proc.) = ?

**Plasma—**  
**HPA-3b antibody(Immunoglobulin M);**  
**arbitrary substance concentration(procedure)**  
**arbitrary unit/litre**  
**NPU21515**  
P—HPA-3b antibody(IgM); arb.subst.c.(proc.) = ? arb.unit/l

**Plasma—**  
**HPA-3b antibody;**  
**arbitrary concentration(procedure)**  
**NPU21334**  
P—HPA-3b antibody; arb.c.(proc.) = ?

**Plasma—**  
**HPA-3b antibody;**  
**arbitrary substance concentration(procedure)**  
**arbitrary unit/litre**  
**NPU21440**  
P—HPA-3b antibody; arb.subst.c.(proc.) = ? arb.unit/l

**Thrombocytes(Blood)—**  
**HPA-3b antigen;**  
**arbitrary number(procedure)**  
**NPU21347**  
Trcs(B)—HPA-3b antigen; arb.num.(proc.) = ?

**Plasma—**  
**HPA-4a antibody(Immunoglobulin A);**  
**arbitrary concentration(procedure)**  
**NPU21467**  
P—HPA-4a antibody(IgA); arb.c.(proc.) = ?

**Plasma—**  
**HPA-4a antibody(Immunoglobulin A);**  
**arbitrary substance concentration(procedure)**  
**arbitrary unit/litre**  
**NPU21504**  
P—HPA-4a antibody(IgA); arb.subst.c.(proc.) = ? arb.unit/l

**Plasma—**  
**HPA-4a antibody(Immunoglobulin G);**  
**arbitrary concentration(procedure)**  
**NPU21454**  
P—HPA-4a antibody(IgG); arb.c.(proc.) = ?

**Plasma—**  
**HPA-4a antibody(Immunoglobulin G);**  
**arbitrary substance concentration(procedure)**  
**arbitrary unit/litre**  
**NPU21492**  
P—HPA-4a antibody(IgG); arb.subst.c.(proc.) = ? arb.unit/l

**Plasma—**  
**HPA-4a antibody(Immunoglobulin M);**  
**arbitrary concentration(procedure)**  
**NPU21480**  
P—HPA-4a antibody(IgM); arb.c.(proc.) = ?

**Plasma—**  
**HPA-4a antibody(Immunoglobulin M);**  
**arbitrary substance concentration(procedure)**  
**arbitrary unit/litre**  
**NPU21516**  
P—HPA-4a antibody(IgM); arb.subst.c.(proc.) = ? arb.unit/l

**Plasma—**  
**HPA-4a antibody;**  
**arbitrary concentration(procedure)**  
**NPU21335**  
P—HPA-4a antibody; arb.c.(proc.) = ?

**Plasma—**  
**HPA-4a antibody;**  
**arbitrary substance concentration(procedure)**  
**arbitrary unit/litre**  
**NPU21441**  
P—HPA-4a antibody; arb.subst.c.(proc.) = ? arb.unit/l

**Thrombocytes(Blood)—**  
**HPA-4a antigen;**  
**arbitrary number(procedure)**  
**NPU21348**  
Trcs(B)—HPA-4a antigen; arb.num.(proc.) = ?

**Plasma—**  
**HPA-4b antibody(Immunoglobulin A);**  
**arbitrary concentration(procedure)**  
**NPU21468**  
P—HPA-4b antibody(IgA); arb.c.(proc.) = ?

**Plasma—**  
**HPA-4b antibody(Immunoglobulin A);**  
**arbitrary substance concentration(procedure)**  
**arbitrary unit/litre**  
**NPU21505**  
P—HPA-4b antibody(IgA); arb.subst.c.(proc.) = ? arb.unit/l

**Plasma—**  
**HPA-4b antibody(Immunoglobulin G);**  
**arbitrary concentration(procedure)**  
**NPU21455**  
P—HPA-4b antibody(IgG); arb.c.(proc.) = ?

**Plasma—**  
**HPA-4b antibody(Immunoglobulin G);**  
**arbitrary substance concentration(procedure)**  
**arbitrary unit/litre**  
**NPU21493**  
P—HPA-4b antibody(IgG); arb.subst.c.(proc.) = ? arb.unit/l

**Plasma—**  
**HPA-4b antibody(Immunoglobulin M);**  
**arbitrary concentration(procedure)**  
**NPU21481**  
P—HPA-4b antibody(IgM); arb.c.(proc.) = ?

**Plasma—**  
**HPA-4b antibody(Immunoglobulin M);**  
**arbitrary substance concentration(procedure)**  
**arbitrary unit/litre**  
**NPU21517**  
P—HPA-4b antibody(IgM); arb.subst.c.(proc.) = ? arb.unit/l

**Plasma—**  
**HPA-4b antibody;**  
**arbitrary concentration(procedure)**  
**NPU21336**  
P—HPA-4b antibody; arb.c.(proc.) = ?

**Plasma—**  
**HPA-4b antibody;**  
**arbitrary substance concentration(procedure)**  
**arbitrary unit/litre**  
**NPU21442**  
P—HPA-4b antibody; arb.subst.c.(proc.) = ? arb.unit/l

**Thrombocytes(Blood)—**  
**HPA-4b antigen;**  
**arbitrary number(procedure)**  
**NPU21349**  
Trcs(B)—HPA-4b antigen; arb.num.(proc.) = ?

**Plasma—**  
**HPA-5a antibody(Immunoglobulin A);**  
**arbitrary concentration(procedure)**  
**NPU21469**  
P—HPA-5a antibody(IgA); arb.c.(proc.) = ?

**Plasma—**  
**HPA-5a antibody(Immunoglobulin A);**  
**arbitrary substance concentration(procedure)**  
**arbitrary unit/litre**  
**NPU21506**  
P—HPA-5a antibody(IgA); arb.subst.c.(proc.) = ? arb.unit/l

**Plasma—**  
**HPA-5a antibody(Immunoglobulin G);**  
**arbitrary concentration(procedure)**  
**NPU21456**  
P—HPA-5a antibody(IgG); arb.c.(proc.) = ?

**Plasma—**  
**HPA-5a antibody(Immunoglobulin G);**  
**arbitrary substance concentration(procedure)**  
**arbitrary unit/litre**  
**NPU21494**  
P—HPA-5a antibody(IgG); arb.subst.c.(proc.) = ? arb.unit/l

**Plasma—**  
**HPA-5a antibody(Immunoglobulin M);**  
**arbitrary concentration(procedure)**  
**NPU21482**  
P—HPA-5a antibody(IgM); arb.c.(proc.) = ?

**Plasma—**  
**HPA-5a antibody(Immunoglobulin M);**  
**arbitrary substance concentration(procedure)**  
**arbitrary unit/litre**  
**NPU21518**  
P—HPA-5a antibody(IgM); arb.subst.c.(proc.) = ? arb.unit/l

**Plasma—**  
**HPA-5a antibody;**  
**arbitrary concentration(procedure)**  
**NPU21337**  
P—HPA-5a antibody; arb.c.(proc.) = ?

**Plasma—**  
**HPA-5a antibody;**  
**arbitrary substance concentration(procedure)**  
**arbitrary unit/litre**  
**NPU21443**  
P—HPA-5a antibody; arb.subst.c.(proc.) = ? arb.unit/l

**Thrombocytes(Blood)—**  
**HPA-5a antigen;**  
**arbitrary number(procedure)**  
**NPU21350**  
Trcs(B)—HPA-5a antigen; arb.num.(proc.) = ?

**Plasma—**  
**HPA-5b antibody(Immunoglobulin A);**  
**arbitrary concentration(procedure)**  
**NPU21470**  
P—HPA-5b antibody(IgA); arb.c.(proc.) = ?

**Plasma—**  
**HPA-5b antibody(Immunoglobulin A);**  
**arbitrary substance concentration(procedure)**  
**arbitrary unit/litre**  
**NPU21507**  
P—HPA-5b antibody(IgA); arb.subst.c.(proc.) = ? arb.unit/l

**Plasma—**  
**HPA-5b antibody(Immunoglobulin G);**  
**arbitrary concentration(procedure)**  
**NPU21457**  
P—HPA-5b antibody(IgG); arb.c.(proc.) = ?

**Plasma—**  
**HPA-5b antibody(Immunoglobulin G);**  
**arbitrary substance concentration(procedure)**  
**arbitrary unit/litre**  
**NPU21495**  
P—HPA-5b antibody(IgG); arb.subst.c.(proc.) = ? arb.unit/l

**Plasma—**  
**HPA-5b antibody(Immunoglobulin M);**  
**arbitrary concentration(procedure)**  
**NPU21483**  
P—HPA-5b antibody(IgM); arb.c.(proc.) = ?

**Plasma—**  
**HPA-5b antibody(Immunoglobulin M);**  
**arbitrary substance concentration(procedure)**  
**arbitrary unit/litre**  
**NPU21519**  
P—HPA-5b antibody(IgM); arb.subst.c.(proc.) = ? arb.unit/l

**Plasma—**  
**HPA-5b antibody;**  
**arbitrary concentration(procedure)**  
**NPU21338**  
P—HPA-5b antibody; arb.c.(proc.) = ?

**Plasma—**  
**HPA-5b antibody;**  
**arbitrary substance concentration(procedure)**  
**arbitrary unit/litre**  
**NPU21444**  
P—HPA-5b antibody; arb.subst.c.(proc.) = ? arb.unit/l

**Thrombocytes(Blood)—**  
**HPA-5b antigen;**  
**arbitrary number(procedure)**  
**NPU21351**  
Trcs(B)—HPA-5b antigen; arb.num.(proc.) = ?

**Plasma—**  
**HPA-6b antibody(Immunoglobulin A);**  
**arbitrary concentration(procedure)**  
**NPU21471**  
P—HPA-6b antibody(IgA); arb.c.(proc.) = ?

**Plasma—**  
**HPA-6b antibody(Immunoglobulin A);**  
**arbitrary substance concentration(procedure)**  
**arbitrary unit/litre**  
**NPU21508**  
P—HPA-6b antibody(IgA); arb.subst.c.(proc.) = ? arb.unit/l

**Plasma—**  
**HPA-6b antibody(Immunoglobulin G);**  
**arbitrary concentration(procedure)**  
**NPU21458**  
P—HPA-6b antibody(IgG); arb.c.(proc.) = ?

**Plasma—**  
**HPA-6b antibody(Immunoglobulin G);**  
**arbitrary substance concentration(procedure)**  
**arbitrary unit/litre**  
**NPU21496**  
P—HPA-6b antibody(IgG); arb.subst.c.(proc.) = ? arb.unit/l

**Plasma—**  
**HPA-6b antibody(Immunoglobulin M);**  
**arbitrary concentration(procedure)**  
**NPU21484**  
P—HPA-6b antibody(IgM); arb.c.(proc.) = ?

**Plasma—**  
**HPA-6b antibody(Immunoglobulin M);**  
**arbitrary substance concentration(procedure)**  
**arbitrary unit/litre**  
**NPU21520**  
P—HPA-6b antibody(IgM); arb.subst.c.(proc.) = ? arb.unit/l

**Plasma—**  
**HPA-6b antibody;**  
**arbitrary concentration(procedure)**  
**NPU21339**  
P—HPA-6b antibody; arb.c.(proc.) = ?

**Plasma—**  
**HPA-6b antibody;**  
**arbitrary substance concentration(procedure)**  
**arbitrary unit/litre**  
**NPU21445**  
P—HPA-6b antibody; arb.subst.c.(proc.) = ? arb.unit/l

**Thrombocytes(Blood)—**  
**HPA-6b antigen;**  
**arbitrary number(procedure)**  
**NPU21352**  
Trcs(B)—HPA-6b antigen; arb.num.(proc.) = ?

**Plasma—**  
**HPA-7b antibody(Immunoglobulin A);**  
**arbitrary concentration(procedure)**  
**NPU21893**  
P—HPA-7b antibody(IgA); arb.c.(proc.) = ?

**Plasma—**  
**HPA-7b antibody(Immunoglobulin A);**  
**arbitrary substance concentration(procedure)**  
**arbitrary unit/litre**  
**NPU21905**  
P—HPA-7b antibody(IgA); arb.subst.c.(proc.) = ? arb.unit/l

**Plasma—**  
**HPA-7b antibody(Immunoglobulin G);**  
**arbitrary concentration(procedure)**  
**NPU21889**  
P—HPA-7b antibody(IgG); arb.c.(proc.) = ?

**Plasma—**  
**HPA-7b antibody(Immunoglobulin G);**  
**arbitrary substance concentration(procedure)**  
**arbitrary unit/litre**  
**NPU21901**  
P—HPA-7b antibody(IgG); arb.subst.c.(proc.) = ? arb.unit/l

**Plasma—**  
**HPA-7b antibody(Immunoglobulin M);**  
**arbitrary concentration(procedure)**  
**NPU21897**  
P—HPA-7b antibody(IgM); arb.c.(proc.) = ?

**Plasma—**  
**HPA-7b antibody(Immunoglobulin M);**  
**arbitrary substance concentration(procedure)**  
**arbitrary unit/litre**  
**NPU21909**  
P—HPA-7b antibody(IgM); arb.subst.c.(proc.) = ? arb.unit/l

**Plasma—**  
**HPA-7b antibody;**  
**arbitrary concentration(procedure)**  
**NPU21881**  
P—HPA-7b antibody; arb.c.(proc.) = ?

**Plasma—**  
**HPA-7b antibody;**  
**arbitrary substance concentration(procedure)**  
**arbitrary unit/litre**  
**NPU21885**  
P—HPA-7b antibody; arb.subst.c.(proc.) = ? arb.unit/l

**Thrombocytes(Blood)—**  
**HPA-7b antigen;**  
**arbitrary number(procedure)**  
**NPU21353**  
Trcs(B)—HPA-7b antigen; arb.num.(proc.) = ?

**Plasma—**  
**HPA-8b antibody(Immunoglobulin A);**  
**arbitrary concentration(procedure)**  
**NPU21894**  
P—HPA-8b antibody(IgA); arb.c.(proc.) = ?

**Plasma—**  
**HPA-8b antibody(Immunoglobulin A);**  
**arbitrary substance concentration(procedure)**  
**arbitrary unit/litre**  
**NPU21906**  
P—HPA-8b antibody(IgA); arb.subst.c.(proc.) = ? arb.unit/l

**Plasma—**  
**HPA-8b antibody(Immunoglobulin G);**  
**arbitrary concentration(procedure)**  
**NPU21890**  
P—HPA-8b antibody(IgG); arb.c.(proc.) = ?

**Plasma—**  
**HPA-8b antibody(Immunoglobulin G);**  
**arbitrary substance concentration(procedure)**  
**arbitrary unit/litre**  
**NPU21902**  
P—HPA-8b antibody(IgG); arb.subst.c.(proc.) = ? arb.unit/l

**Plasma—**  
**HPA-8b antibody(Immunoglobulin M);**  
**arbitrary concentration(procedure)**  
**NPU21898**  
P—HPA-8b antibody(IgM); arb.c.(proc.) = ?

**Plasma—**  
**HPA-8b antibody(Immunoglobulin M);**  
**arbitrary substance concentration(procedure)**  
**arbitrary unit/litre**  
**NPU21910**  
P—HPA-8b antibody(IgM); arb.subst.c.(proc.) = ? arb.unit/l

**Plasma—**  
**HPA-8b antibody;**  
**arbitrary concentration(procedure)**  
**NPU21882**  
P—HPA-8b antibody; arb.c.(proc.) = ?

**Plasma—**  
**HPA-8b antibody;**  
**arbitrary substance concentration(procedure)**  
**arbitrary unit/litre**  
**NPU21886**  
P—HPA-8b antibody; arb.subst.c.(proc.) = ? arb.unit/l

**Thrombocytes(Blood)—**  
**HPA-8b antigen;**  
**arbitrary number(procedure)**  
**NPU21865**  
 Trcs(B)—HPA-8b antigen; arb.num.(proc.) = ?

**Plasma—**  
**HPA-9b antibody(Immunoglobulin A);**  
**arbitrary concentration(procedure)**  
**NPU21895**  
 P—HPA-9b antibody(IgA); arb.c.(proc.) = ?

**Plasma—**  
**HPA-9b antibody(Immunoglobulin A);**  
**arbitrary substance concentration(procedure)**  
**arbitrary unit/litre**  
**NPU21907**  
 P—HPA-9b antibody(IgA); arb.subst.c.(proc.) = ? arb.unit/l

**Plasma—**  
**HPA-9b antibody(Immunoglobulin G);**  
**arbitrary concentration(procedure)**  
**NPU21891**  
 P—HPA-9b antibody(IgG); arb.c.(proc.) = ?

**Plasma—**  
**HPA-9b antibody(Immunoglobulin G);**  
**arbitrary substance concentration(procedure)**  
**arbitrary unit/litre**  
**NPU21903**  
 P—HPA-9b antibody(IgG); arb.subst.c.(proc.) = ? arb.unit/l

**Plasma—**  
**HPA-9b antibody(Immunoglobulin M);**  
**arbitrary concentration(procedure)**  
**NPU21899**  
 P—HPA-9b antibody(IgM); arb.c.(proc.) = ?

**Plasma—**  
**HPA-9b antibody(Immunoglobulin M);**  
**arbitrary substance concentration(procedure)**  
**arbitrary unit/litre**  
**NPU21911**  
 P—HPA-9b antibody(IgM); arb.subst.c.(proc.) = ? arb.unit/l

**Plasma—**  
**HPA-9b antibody;**  
**arbitrary concentration(procedure)**  
**NPU21883**  
 P—HPA-9b antibody; arb.c.(proc.) = ?

**Plasma—**  
**HPA-9b antibody;**  
**arbitrary substance concentration(procedure)**  
**arbitrary unit/litre**  
**NPU21887**  
 P—HPA-9b antibody; arb.subst.c.(proc.) = ? arb.unit/l

**Thrombocytes(Blood)—**  
**HPA-9b antigen;**  
**arbitrary number(procedure)**  
**NPU21866**  
 Trcs(B)—HPA-9b antigen; arb.num.(proc.) = ?

**Plasma—**  
**HPA-unknown antibody(Immunoglobulin A);**  
**arbitrary concentration(procedure)**  
**NPU21472**  
 P—HPA-unknown antibody(IgA); arb.c.(proc.) = ?

**Plasma—**  
**HPA-unknown antibody(Immunoglobulin A);**  
**arbitrary substance concentration(procedure)**  
**arbitrary unit/litre**  
**NPU21509**  
 P—HPA-unknown antibody(IgA); arb.subst.c.(proc.) = ?  
 arb.unit/l

**Plasma—**  
**HPA-unknown antibody(Immunoglobulin G);**  
**arbitrary concentration(procedure)**  
**NPU21459**  
 P—HPA-unknown antibody(IgG); arb.c.(proc.) = ?

**Plasma—**  
**HPA-unknown antibody(Immunoglobulin G);**  
**arbitrary substance concentration(procedure)**  
**arbitrary unit/litre**  
**NPU21497**  
 P—HPA-unknown antibody(IgG); arb.subst.c.(proc.) = ?  
 arb.unit/l

**Plasma—**  
**HPA-unknown antibody(Immunoglobulin M);**  
**arbitrary concentration(procedure)**  
**NPU21485**  
 P—HPA-unknown antibody(IgM); arb.c.(proc.) = ?

**Plasma—**  
**HPA-unknown antibody(Immunoglobulin M);**  
**arbitrary substance concentration(procedure)**  
**arbitrary unit/litre**  
**NPU21521**  
 P—HPA-unknown antibody(IgM); arb.subst.c.(proc.) = ?  
 arb.unit/l

**Plasma—**  
**HPA-unknown antibody;**  
**arbitrary concentration(procedure)**  
**NPU21340**  
 P—HPA-unknown antibody; arb.c.(proc.) = ?

**Plasma—**  
**HPA-unknown antibody;**  
**arbitrary substance concentration(procedure)**  
**arbitrary unit/litre**  
**NPU21446**  
 P—HPA-unknown antibody; arb.subst.c.(proc.) = ? arb.unit/l

**Erythrocytes(Blood)—**  
**Immunoglobulin A;**  
**arbitrary entitic number(procedure)**  
**arbitrary unit**  
*M* = 160 000 g/mol  
 Other term(s): IgA  
**NPU01947**  
 ErCs(B)—Immunoglobulin A; arb.entitic num.(proc.) = ? arb.unit

**Neutrophilocytes(Blood)—**  
**Immunoglobulin A;**  
**arbitrary entitic number(procedure)**  
**arbitrary unit**  
**NPU21943**  
 Ntrcs(B)—Immunoglobulin A; arb.entitic num.(proc.) = ?  
 arb.unit

**Thrombocytes(Blood)—**  
**Immunoglobulin A;**  
**arbitrary entitic number(procedure)**  
**arbitrary unit**  
**NPU20057**  
 Trcs(B)—Immunoglobulin A; arb.entitic num.(proc.) = ? arb.unit

**Erythrocytes(Blood)—**  
**Immunoglobulin A;**  
**arbitrary number(procedure)**  
**NPU20028**  
Eracs(B)—Immunoglobulin A; arb.num.(proc.) = ?

**Thrombocytes(Blood)—**  
**Immunoglobulin A;**  
**arbitrary number(procedure)**  
**NPU20046**  
Tracs(B)—Immunoglobulin A; arb.num.(proc.) = ?

**Erythrocytes(Blood)—**  
**Immunoglobulin A;**  
**entitic number**  
*M* = 160 000 g/mol  
Other term(s): IgA  
**NPU02475**  
Eracs(B)—Immunoglobulin A; entitic num. = ?

**Neutrophilocytes(Blood)—**  
**Immunoglobulin A;**  
**entitic number**  
**NPU21955**  
Ntracs(B)—Immunoglobulin A; entitic num. = ?

**Thrombocytes(Blood)—**  
**Immunoglobulin A;**  
**entitic number**  
**NPU20068**  
Tracs(B)—Immunoglobulin A; entitic num. = ?

**Erythrocytes(Blood)—**  
**Immunoglobulin G;**  
**arbitrary entitic number(procedure)**  
**arbitrary unit**  
**NPU20003**  
Eracs(B)—Immunoglobulin G; arb.entitic num.(proc.) = ?  
arb.unit

**Neutrophilocytes(Blood)—**  
**Immunoglobulin G;**  
**arbitrary entitic number(procedure)**  
**arbitrary unit**  
**NPU21944**  
Ntracs(B)—Immunoglobulin G; arb.entitic num.(proc.) = ?  
arb.unit

**Thrombocytes(Blood)—**  
**Immunoglobulin G;**  
**arbitrary entitic number(procedure)**  
**arbitrary unit**  
**NPU20058**  
Tracs(B)—Immunoglobulin G; arb.entitic num.(proc.) = ? arb.unit

**Erythrocytes(Blood)—**  
**Immunoglobulin G;**  
**arbitrary number(procedure)**  
*M* = 160 000 g/mol  
Other term(s): IgG  
**NPU04070**  
Eracs(B)—Immunoglobulin G; arb.num.(proc.) = ?

**Thrombocytes(Blood)—**  
**Immunoglobulin G;**  
**arbitrary number(procedure)**  
**NPU20047**  
Tracs(B)—Immunoglobulin G; arb.num.(proc.) = ?

**Erythrocytes(Blood)—**  
**Immunoglobulin G;**  
**entitic number**  
*M* = 160 000 g/mol  
Other term(s): IgG  
**NPU01948**  
Eracs(B)—Immunoglobulin G; entitic num. = ?

**Neutrophilocytes(Blood)—**  
**Immunoglobulin G;**  
**entitic number**  
**NPU21956**  
Ntracs(B)—Immunoglobulin G; entitic num. = ?

**Thrombocytes(Blood)—**  
**Immunoglobulin G;**  
**entitic number**  
**NPU20069**  
Tracs(B)—Immunoglobulin G; entitic num. = ?

**Erythrocytes(Blood)—**  
**Immunoglobulin G1;**  
**arbitrary entitic number(procedure)**  
**arbitrary unit**  
*M* = 146 000 g/mol  
**NPU04066**  
Eracs(B)—Immunoglobulin G1; arb.entitic num.(proc.) = ?  
arb.unit

**Neutrophilocytes(Blood)—**  
**Immunoglobulin G1;**  
**arbitrary entitic number(procedure)**  
**arbitrary unit**  
**NPU21945**  
Ntracs(B)—Immunoglobulin G1; arb.entitic num.(proc.) = ?  
arb.unit

**Thrombocytes(Blood)—**  
**Immunoglobulin G1;**  
**arbitrary entitic number(procedure)**  
**arbitrary unit**  
**NPU20059**  
Tracs(B)—Immunoglobulin G1; arb.entitic num.(proc.) = ?  
arb.unit

**Erythrocytes(Blood)—**  
**Immunoglobulin G1;**  
**arbitrary number(procedure)**  
**NPU20030**  
Eracs(B)—Immunoglobulin G1; arb.num.(proc.) = ?

**Thrombocytes(Blood)—**  
**Immunoglobulin G1;**  
**arbitrary number(procedure)**  
**NPU20048**  
Tracs(B)—Immunoglobulin G1; arb.num.(proc.) = ?

**Erythrocytes(Blood)—**  
**Immunoglobulin G1;**  
**entitic number**  
**NPU01949**  
Eracs(B)—Immunoglobulin G1; entitic num. = ?

**Neutrophilocytes(Blood)—**  
**Immunoglobulin G1;**  
**entitic number**  
**NPU21957**  
Ntracs(B)—Immunoglobulin G1; entitic num. = ?

**Thrombocytes(Blood)—**  
**Immunoglobulin G1;**  
**entitic number**  
**NPU20070**  
Tracs(B)—Immunoglobulin G1; entitic num. = ?

**Erythrocytes(Blood)—**  
**Immunoglobulin G2;**  
**arbitrary entitic number(procedure)**  
**arbitrary unit**  
*M* = 146 000 g/mol  
**NPU04067**  
Eracs(B)—Immunoglobulin G2; arb.entitic num.(proc.) = ?  
arb.unit

**Neutrophilocytes(Blood)—**  
**Immunoglobulin G2;**  
arbitrary entitic number(procedure)  
arbitrary unit  
**NPU21946**  
Ntrcs(B)—Immunoglobulin G2; arb.entitic num.(proc.) = ?  
arb.unit

**Thrombocytes(Blood)—**  
**Immunoglobulin G2;**  
arbitrary entitic number(procedure)  
arbitrary unit  
**NPU20060**  
Trcs(B)—Immunoglobulin G2; arb.entitic num.(proc.) = ?  
arb.unit

**Erythrocytes(Blood)—**  
**Immunoglobulin G2;**  
arbitrary number(procedure)  
**NPU20031**  
Eracs(B)—Immunoglobulin G2; arb.num.(proc.) = ?

**Thrombocytes(Blood)—**  
**Immunoglobulin G2;**  
arbitrary number(procedure)  
**NPU20049**  
Trcs(B)—Immunoglobulin G2; arb.num.(proc.) = ?

**Erythrocytes(Blood)—**  
**Immunoglobulin G2;**  
entitic number  
*M* = 146 000 g/mol  
**NPU01950**  
Eracs(B)—Immunoglobulin G2; entitic num. = ?

**Neutrophilocytes(Blood)—**  
**Immunoglobulin G2;**  
entitic number  
**NPU21958**  
Ntrcs(B)—Immunoglobulin G2; entitic num. = ?

**Thrombocytes(Blood)—**  
**Immunoglobulin G2;**  
entitic number  
**NPU20071**  
Trcs(B)—Immunoglobulin G2; entitic num. = ?

**Erythrocytes(Blood)—**  
**Immunoglobulin G3;**  
arbitrary entitic number(procedure)  
arbitrary unit  
*M* = 170 000 g/mol  
**NPU04068**  
Eracs(B)—Immunoglobulin G3; arb.entitic num.(proc.) = ?  
arb.unit

**Neutrophilocytes(Blood)—**  
**Immunoglobulin G3;**  
arbitrary entitic number(procedure)  
arbitrary unit  
**NPU21947**  
Ntrcs(B)—Immunoglobulin G3; arb.entitic num.(proc.) = ?  
arb.unit

**Thrombocytes(Blood)—**  
**Immunoglobulin G3;**  
arbitrary entitic number(procedure)  
arbitrary unit  
**NPU20061**  
Trcs(B)—Immunoglobulin G3; arb.entitic num.(proc.) = ?  
arb.unit

**Erythrocytes(Blood)—**  
**Immunoglobulin G3;**  
arbitrary number(procedure)  
**NPU20032**  
Eracs(B)—Immunoglobulin G3; arb.num.(proc.) = ?

**Thrombocytes(Blood)—**  
**Immunoglobulin G3;**  
arbitrary number(procedure)  
**NPU20050**  
Trcs(B)—Immunoglobulin G3; arb.num.(proc.) = ?

**Erythrocytes(Blood)—**  
**Immunoglobulin G3;**  
entitic number  
*M* = 170 000 g/mol  
**NPU01951**  
Eracs(B)—Immunoglobulin G3; entitic num. = ?

**Neutrophilocytes(Blood)—**  
**Immunoglobulin G3;**  
entitic number  
**NPU21959**  
Ntrcs(B)—Immunoglobulin G3; entitic num. = ?

**Thrombocytes(Blood)—**  
**Immunoglobulin G3;**  
entitic number  
**NPU20072**  
Trcs(B)—Immunoglobulin G3; entitic num. = ?

**Erythrocytes(Blood)—**  
**Immunoglobulin G4;**  
arbitrary entitic number(procedure)  
arbitrary unit  
*M* = 146 000 g/mol  
**NPU04069**  
Eracs(B)—Immunoglobulin G4; arb.entitic num.(proc.) = ?  
arb.unit

**Neutrophilocytes(Blood)—**  
**Immunoglobulin G4;**  
arbitrary entitic number(procedure)  
arbitrary unit  
**NPU21948**  
Ntrcs(B)—Immunoglobulin G4; arb.entitic num.(proc.) = ?  
arb.unit

**Thrombocytes(Blood)—**  
**Immunoglobulin G4;**  
arbitrary entitic number(procedure)  
arbitrary unit  
**NPU20062**  
Trcs(B)—Immunoglobulin G4; arb.entitic num.(proc.) = ?  
arb.unit

**Erythrocytes(Blood)—**  
**Immunoglobulin G4;**  
arbitrary number(procedure)  
**NPU20033**  
Eracs(B)—Immunoglobulin G4; arb.num.(proc.) = ?

**Thrombocytes(Blood)—**  
**Immunoglobulin G4;**  
arbitrary number(procedure)  
**NPU20051**  
Trcs(B)—Immunoglobulin G4; arb.num.(proc.) = ?

**Erythrocytes(Blood)—**  
**Immunoglobulin G4;**  
entitic number  
*M* = 146 000 g/mol  
**NPU01952**  
Eracs(B)—Immunoglobulin G4; entitic num. = ?

**Neutrophilocytes(Blood)—**  
**Immunoglobulin G4;**  
entitic number  
**NPU21960**  
Ntrcs(B)—Immunoglobulin G4; entitic num. = ?

**Thrombocytes(Blood)—**  
**Immunoglobulin G4;**  
**entitic number**  
**NPU20073**  
 Trcs(B)—Immunoglobulin G4; entitic num. = ?

**Erythrocytes(Blood)—**  
**Immunoglobulin M;**  
**arbitrary entitic number(procedure)**  
**arbitrary unit**  
*M* = 950 000 g/mol  
 Other term(s): IgM  
**NPU02487**  
 Eracs(B)—Immunoglobulin M; arb.entitic num.(proc.) = ?  
 arb.unit

**Neutrophilocytes(Blood)—**  
**Immunoglobulin M;**  
**arbitrary entitic number(procedure)**  
**arbitrary unit**  
**NPU21949**  
 Ntrcs(B)—Immunoglobulin M; arb.entitic num.(proc.) = ?  
 arb.unit

**Thrombocytes(Blood)—**  
**Immunoglobulin M;**  
**arbitrary entitic number(procedure)**  
**arbitrary unit**  
**NPU20063**  
 Trcs(B)—Immunoglobulin M; arb.entitic num.(proc.) = ?  
 arb.unit

**Erythrocytes(Blood)—**  
**Immunoglobulin M;**  
**arbitrary number(procedure)**  
**NPU20034**  
 Eracs(B)—Immunoglobulin M; arb.num.(proc.) = ?

**Thrombocytes(Blood)—**  
**Immunoglobulin M;**  
**arbitrary number(procedure)**  
**NPU20052**  
 Trcs(B)—Immunoglobulin M; arb.num.(proc.) = ?

**Erythrocytes(Blood)—**  
**Immunoglobulin M;**  
**entitic number**  
*M* = 950 000 g/mol  
**NPU01953**  
 Eracs(B)—Immunoglobulin M; entitic num. = ?

**Neutrophilocytes(Blood)—**  
**Immunoglobulin M;**  
**entitic number**  
**NPU21961**  
 Ntrcs(B)—Immunoglobulin M; entitic num. = ?

**Thrombocytes(Blood)—**  
**Immunoglobulin M;**  
**entitic number**  
**NPU20074**  
 Trcs(B)—Immunoglobulin M; entitic num. = ?

**Erythrocytes(Blood)—**  
**Immunoglobulin;**  
**arbitrary entitic number(procedure)**  
**arbitrary unit**  
**NPU20176**  
 Eracs(B)—Immunoglobulin; arb.entitic num.(proc.) = ? arb.unit

**Neutrophilocytes(Blood)—**  
**Immunoglobulin;**  
**arbitrary entitic number(procedure)**  
**arbitrary unit**  
**NPU21942**  
 Ntrcs(B)—Immunoglobulin; arb.entitic num.(proc.) = ? arb.unit

**Thrombocytes(Blood)—**  
**Immunoglobulin;**  
**arbitrary entitic number(procedure)**  
**arbitrary unit**  
**NPU20179**  
 Trcs(B)—Immunoglobulin; arb.entitic num.(proc.) = ? arb.unit

**Erythrocytes(Blood)—**  
**Immunoglobulin;**  
**arbitrary number(procedure)**  
**NPU20175**  
 Eracs(B)—Immunoglobulin; arb.num.(proc.) = ?

**Thrombocytes(Blood)—**  
**Immunoglobulin;**  
**arbitrary number(procedure)**  
**NPU20178**  
 Trcs(B)—Immunoglobulin; arb.num.(proc.) = ?

**Erythrocytes(Blood)—**  
**Immunoglobulin;**  
**entitic number**  
**NPU20177**  
 Eracs(B)—Immunoglobulin; entitic num. = ?

**Neutrophilocytes(Blood)—**  
**Immunoglobulin;**  
**entitic number**  
**NPU21954**  
 Ntrcs(B)—Immunoglobulin; entitic num. = ?

**Thrombocytes(Blood)—**  
**Immunoglobulin;**  
**entitic number**  
**NPU20180**  
 Trcs(B)—Immunoglobulin; entitic num. = ?

**Culture(Lymphocytes; Blood)—**  
**Lymphocyte stimulation(antigen);**  
**relative number concentration(list;**  
**stimulated/unstimulated; procedure)**  
**NPU21413**  
 Culture(Lymcs; B)—Lymphocyte stimulation(Ag);  
 rel.num.c.(list; stim./unstim.; proc.) = ?  
 NPU21415 Culture(Lymcs; B)—*Candida albicans* stimulated  
 lymphocytes; rel.num.c.(stim./unstim.; proc.) = ?  
 NPU21416 Culture(Lymcs; B)—*Cytomegalovirus* stimulated  
 lymphocytes; rel.num.c.(stim./unstim.; proc.) = ?  
 NPU21417 Culture(Lymcs; B)—*Staphylococcus aureus*  
 stimulated lymphocytes; rel.num.c.(stim./unstim.; proc.) = ?  
 NPU21418 Culture(Lymcs; B)—Tetanus toxoid stimulated  
 lymphocytes; rel.num.c.(stim./unstim.; proc.) = ?  
 NPU21419 Culture(Lymcs; B)—Tuberculin stimulated  
 lymphocytes; rel.num.c.(stim./unstim.; proc.) = ?

**Culture(Lymphocytes; Blood)—**  
**Lymphocyte stimulation(mitogen);**  
**relative number ratio(list; actual/norm; procedure)**  
**NPU21421**  
 Culture(Lymcs; B)—Lymphocyte stimulation(mitogen);  
 rel.num.ratio(list; actual/norm; proc.) = ?  
 NPU21422 Culture(Lymcs; B)—Concanavalin A stimulated  
 lymphocytes; rel.num.ratio(actual/norm; proc.) = ?  
 NPU21423 Culture(Lymcs; B)—Phytohæmaglutinin stimulated  
 lymphocytes; rel.num.ratio(actual/norm; proc.) = ?  
 NPU21424 Culture(Lymcs; B)—Pokeweed stimulated  
 lymphocytes; rel.num.ratio(actual/norm; proc.) = ?

**Blood—****Lymphocyte type;  
number concentration(list)****NPU21818**

B—Lymphocyte type; num.c.(list)

NPU21819 B—B-lymphocytes; num.c. = ? × 10<sup>9</sup>/lNPU21820 B—B-lymphocytes(mature); num.c. = ? × 10<sup>9</sup>/lNPU21821 B—B-lymphocytes(immature); num.c. = ? × 10<sup>9</sup>/lNPU21822 B—T-lymphocytes; num.c. = ? × 10<sup>9</sup>/lNPU21823 B—T-lymphocytes(helper; virgin); num.c. = ? × 10<sup>9</sup>/l10<sup>9</sup>/lNPU21825 B—T-lymphocytes(helper; memory); num.c. = ? × 10<sup>9</sup>/lNPU21826 B—T-lymphocytes(helper; memory; Th1); num.c. = ? × 10<sup>9</sup>/lNPU21827 B—T-lymphocytes(helper; memory; Th2); num.c. = ? × 10<sup>9</sup>/lNPU21828 B—T-lymphocytes(cytotox.); num.c. = ? × 10<sup>9</sup>/lNPU21829 B—T-lymphocytes(cytotox.; virgin); num.c. = ? × 10<sup>9</sup>/l10<sup>9</sup>/lNPU21830 B—T-lymphocytes(cytotox.; memory); num.c. = ? × 10<sup>9</sup>/lNPU21831 B—T-lymphocytes(cytotox.; memory; Th1); num.c. = ? × 10<sup>9</sup>/lNPU21832 B—T-lymphocytes(cytotox.; memory; Th2); num.c. = ? × 10<sup>9</sup>/lNPU21833 B—T-lymphocytes(alpha beta TCR); num.c. = ? × 10<sup>9</sup>/lNPU21834 B—T-lymphocytes(gamma delta TCR); num.c. = ? × 10<sup>9</sup>/lNPU21835 B—NK-lymphocytes; num.c. = ? × 10<sup>9</sup>/l**Bone marrow—****Lymphocyte type;  
number concentration(list)****NPU21836**

Marrow—Lymphocyte type; num.c.(list)

NPU21837 Marrow—B-lymphocytes; num.c. = ? × 10<sup>9</sup>/lNPU21838 Marrow—B-lymphocytes(mature); num.c. = ? × 10<sup>9</sup>/l10<sup>9</sup>/lNPU21839 Marrow—B-lymphocytes(immature); num.c. = ? × 10<sup>9</sup>/lNPU21840 Marrow—T-lymphocytes; num.c. = ? × 10<sup>9</sup>/lNPU21841 Marrow—T-lymphocytes(helper); num.c. = ? × 10<sup>9</sup>/lNPU21842 Marrow—T-lymphocytes(helper; virgin); num.c. = ? × 10<sup>9</sup>/lNPU21843 Marrow—T-lymphocytes(helper; memory); num.c. = ? × 10<sup>9</sup>/lNPU21844 Marrow—T-lymphocytes(helper; memory; Th1); num.c. = ? × 10<sup>9</sup>/lNPU21845 Marrow—T-lymphocytes(helper; memory; Th2); num.c. = ? × 10<sup>9</sup>/lNPU21846 Marrow—T-lymphocytes(cytotox.); num.c. = ? × 10<sup>9</sup>/lNPU21847 Marrow—T-lymphocytes(cytotox.; virgin); num.c. = ? × 10<sup>9</sup>/lNPU21848 Marrow—T-lymphocytes(cytotox.; memory); num.c. = ? × 10<sup>9</sup>/lNPU21849 Marrow—T-lymphocytes(cytotox.; memory; Th1); num.c. = ? × 10<sup>9</sup>/lNPU21850 Marrow—T-lymphocytes(cytotox.; memory; Th2); num.c. = ? × 10<sup>9</sup>/lNPU21851 Marrow—T-lymphocytes(alpha beta TCR); num.c. = ? × 10<sup>9</sup>/lNPU21852 Marrow—T-lymphocytes(gamma delta TCR); num.c. = ? × 10<sup>9</sup>/lNPU21853 Marrow—NK-lymphocytes; num.c. = ? × 10<sup>9</sup>/l**Lymphocytes(Blood)—****Lymphocyte type;  
number fraction(list)****NPU21780**

Lymcs(B)—Lymphocyte type; num.fr.(list)

NPU21781 Lymcs(B)—B-lymphocytes; num.fr. = ?

NPU21782 Lymcs(B)—B-lymphocytes(mature); num.fr. = ?

NPU21783 Lymcs(B)—B-lymphocytes(immature); num.fr. = ?

NPU21784 Lymcs(B)—T-lymphocytes; num.fr. = ?

NPU21785 Lymcs(B)—T-lymphocytes(helper); num.fr. = ?

NPU21786 Lymcs(B)—T-lymphocytes(helper; virgin); num.fr. = ?

NPU21787 Lymcs(B)—T-lymphocytes(helper; memory); num.fr. = ?

NPU21788 Lymcs(B)—T-lymphocytes(helper; memory; Th1); num.fr. = ?

NPU21789 Lymcs(B)—T-lymphocytes(helper; memory; Th2); num.fr. = ?

NPU21790 Lymcs(B)—T-lymphocytes(cytotox.); num.fr. = ?

NPU21791 Lymcs(B)—T-lymphocytes(cytotox.; virgin); num.fr. = ?

NPU21792 Lymcs(B)—T-lymphocytes(cytotox.; memory); num.fr. = ?

NPU21793 Lymcs(B)—T-lymphocytes(cytotox.; memory; Th1); num.fr. = ?

NPU21794 Lymcs(B)—T-lymphocytes(cytotox.; memory; Th2); num.fr. = ?

NPU21795 Lymcs(B)—T-lymphocytes(alpha beta TCR); num.fr. = ?

NPU21796 Lymcs(B)—T-lymphocytes(gamma delta TCR); num.fr. = ?

NPU21797 Lymcs(B)—T-lymphocytes(activated); num.fr. = ?

NPU21798 Lymcs(B)—NK-lymphocytes; num.fr. = ?

**Lymphocytes(Bone marrow)—****Lymphocyte type;  
number fraction(list)****NPU21799**

Lymcs(Marrow)—Lymphocyte type; num.fr.(list)

NPU21800 Lymcs(Marrow)—B-lymphocytes; num.fr. = ?

NPU21801 Lymcs(Marrow)—B-lymphocytes(mature); num.fr. = ?

NPU21802 Lymcs(Marrow)—B-lymphocytes(immature); num.fr. = ?

NPU21803 Lymcs(Marrow)—T-lymphocytes; num.fr. = ?

NPU21804 Lymcs(Marrow)—T-lymphocytes(helper); num.fr. = ?

NPU21805 Lymcs(Marrow)—T-lymphocytes(helper; virgin); num.fr. = ?

NPU21806 Lymcs(Marrow)—T-lymphocytes(helper; memory); num.fr. = ?

NPU21807 Lymcs(Marrow)—T-lymphocytes(helper; memory; Th1); num.fr. = ?

NPU21808 Lymcs(Marrow)—T-lymphocytes(helper; memory; Th2); num.fr. = ?

NPU21809 Lymcs(Marrow)—T-lymphocytes(cytotox.); num.fr. = ?

NPU21810 Lymcs(Marrow)—T-lymphocytes(cytotox.; virgin); num.fr. = ?

NPU21811 Lymcs(Marrow)—T-lymphocytes(cytotox.; memory); num.fr. = ?

NPU21812 Lymcs(Marrow)—T-lymphocytes(cytotox.; memory; Th1); num.fr. = ?

NPU21813 Lymcs(Marrow)—T-lymphocytes(cytotox.; memory; Th2); num.fr. = ?

NPU21814 Lymcs(Marrow)—T-lymphocytes(alpha beta TCR); num.fr. = ?

NPU21815 Lymcs(Marrow)—T-lymphocytes(gamma delta TCR); num.fr. = ?

NPU21816 Lymcs(Marrow)—T-lymphocytes(activated); num.fr. = ?

NPU21817 Lymcs(Marrow)—NK-lymphocytes; num.fr. = ?

- Blood—**  
**NK-lymphocytes;**  
**number concentration**  
**10<sup>9</sup>/litre**  
**NPU21835**  
 B—NK-lymphocytes; num.c. = ? × 10<sup>9</sup>/l
- Bone marrow—**  
**NK-lymphocytes;**  
**number concentration**  
**10<sup>9</sup>/litre**  
**NPU21853**  
 Marrow—NK-lymphocytes; num.c. = ? × 10<sup>9</sup>/l
- Lymphocytes(Blood)—**  
**NK-lymphocytes;**  
**number fraction**  
**NPU21798**  
 Lymcs(B)—NK-lymphocytes; num.fr. = ?
- Lymphocytes(Bone marrow)—**  
**NK-lymphocytes;**  
**number fraction**  
**NPU21817**  
 Lymcs(Marrow)—NK-lymphocytes; num.fr. = ?
- Culture(Lymphocytes; Blood)—**  
**Phytohæmagglutinin stimulated lymphocytes;**  
**relative number ratio(actual/norm; procedure)**  
**NPU21423**  
 Culture(Lymcs; B)—Phytohæmagglutinin stimulated lymphocytes; rel.num.ratio(actual/norm; proc.) = ?
- Culture(Lymphocytes; Blood)—**  
**Pokeweed stimulated lymphocytes;**  
**relative number ratio(actual/norm; procedure)**  
**NPU21424**  
 Culture(Lymcs; B)—Pokeweed stimulated lymphocytes; rel.num.ratio(actual/norm; proc.) = ?
- Culture(Lymphocytes; Blood)—**  
***Staphylococcus aureus* stimulated lymphocytes;**  
**relative number concentration(stimulated/unstimulated; procedure)**  
**NPU21417**  
 Culture(Lymcs; B)—*Staphylococcus aureus* stimulated lymphocytes; rel.num.c.(stim./unstim.; proc.) = ?
- Thrombocytes(Blood)—**  
**Surface glycoprotein(GMP-140);**  
**arbitrary entitic number(procedure)**  
**arbitrary unit**  
**NPU21876**  
 Trcs(B)—Surface glycoprotein(GMP-140); arb.entitic num.(proc.) = ? arb.unit
- Thrombocytes(Blood)—**  
**Surface glycoprotein(GMP-140);**  
**relative entitic number(actual/norm)**  
**NPU21748**  
 Trcs(B)—Surface glycoprotein(GMP-140); rel.entitic num.(actual/norm) = ?
- Thrombocytes(Blood)—**  
**Surface glycoprotein(Ia);**  
**arbitrary entitic number(procedure)**  
**arbitrary unit**  
**NPU21874**  
 Trcs(B)—Surface glycoprotein(Ia); arb.entitic num.(proc.) = ? arb.unit
- Thrombocytes(Blood)—**  
**Surface glycoprotein(Ia);**  
**relative entitic number(actual/norm)**  
**NPU21749**  
 Trcs(B)—Surface glycoprotein(Ia); rel.entitic num.(actual/norm) = ?
- Thrombocytes(Blood)—**  
**Surface glycoprotein(Ib);**  
**arbitrary entitic number(procedure)**  
**arbitrary unit**  
**NPU21428**  
 Trcs(B)—Surface glycoprotein(Ib); arb.entitic num.(proc.) = ? arb.unit
- Thrombocytes(Blood)—**  
**Surface glycoprotein(Ib);**  
**relative entitic number(actual/norm)**  
**NPU21750**  
 Trcs(B)—Surface glycoprotein(Ib); rel.entitic num.(actual/norm) = ?
- Thrombocytes(Blood)—**  
**Surface glycoprotein(IIa);**  
**arbitrary entitic number(procedure)**  
**arbitrary unit**  
**NPU21875**  
 Trcs(B)—Surface glycoprotein(IIa); arb.entitic num.(proc.) = ? arb.unit
- Thrombocytes(Blood)—**  
**Surface glycoprotein(IIa);**  
**relative entitic number(actual/norm)**  
**NPU21751**  
 Trcs(B)—Surface glycoprotein(IIa); rel.entitic num.(actual/norm) = ?
- Thrombocytes(Blood)—**  
**Surface glycoprotein(IIb);**  
**arbitrary entitic number(procedure)**  
**arbitrary unit**  
**NPU21426**  
 Trcs(B)—Surface glycoprotein(IIb); arb.entitic num.(proc.) = ? arb.unit
- Thrombocytes(Blood)—**  
**Surface glycoprotein(IIb);**  
**relative entitic number(actual/norm)**  
**NPU21752**  
 Trcs(B)—Surface glycoprotein(IIb); rel.entitic num.(actual/norm) = ?
- Thrombocytes(Blood)—**  
**Surface glycoprotein(IIIa);**  
**arbitrary entitic number(procedure)**  
**arbitrary unit**  
**NPU21427**  
 Trcs(B)—Surface glycoprotein(IIIa); arb.entitic num.(proc.) = ? arb.unit
- Thrombocytes(Blood)—**  
**Surface glycoprotein(IIIa);**  
**relative entitic number(actual/norm)**  
**NPU21753**  
 Trcs(B)—Surface glycoprotein(IIIa); rel.entitic num.(actual/norm) = ?
- Culture(Lymphocytes; Blood)—**  
**Tetanus toxoid stimulated lymphocytes;**  
**relative number concentration(stimulated/unstimulated; procedure)**  
**NPU21418**  
 Culture(Lymcs; B)—Tetanus toxoid stimulated lymphocytes; rel.num.c.(stim./unstim.; proc.) = ?
- Thrombocytes(Blood)—**  
**Thrombocytes;**  
**compatibility(Plasma; donationID; absent present)**  
**NPU21755**  
 Trcs(B)—Thrombocytes; compatibility(P; donationID; absent present) = ?

**Plasma—**  
**T-lymphocyte antibody;**  
**compatibility(donationID; absent present)**  
**NPU21411**  
P—T-lymphocyte antibody; compatibility(donationID; absent present) = ?

**Lymphocytes(Blood)—**  
**T-lymphocytes(activated);**  
**number fraction**  
**NPU21797**  
Lymcs(B)—T-lymphocytes(activated); num.fr. = ?

**Lymphocytes(Bone marrow)—**  
**T-lymphocytes(activated);**  
**number fraction**  
**NPU21816**  
Lymcs(Marrow)—T-lymphocytes(activated); num.fr. = ?

**Blood—**  
**T-lymphocytes(alpha beta TCR);**  
**number concentration**  
**10<sup>9</sup>/litre**  
**NPU21833**  
B—T-lymphocytes(alpha beta TCR); num.c. = ? × 10<sup>9</sup>/l

**Bone marrow—**  
**T-lymphocytes(alpha beta TCR);**  
**number concentration**  
**10<sup>9</sup>/litre**  
**NPU21851**  
Marrow—T-lymphocytes(alpha beta TCR); num.c. = ? × 10<sup>9</sup>/l

**Lymphocytes(Blood)—**  
**T-lymphocytes(alpha beta TCR);**  
**number fraction**  
**NPU21795**  
Lymcs(B)—T-lymphocytes(alpha beta TCR); num.fr. = ?

**Lymphocytes(Bone marrow)—**  
**T-lymphocytes(alpha beta TCR);**  
**number fraction**  
**NPU21814**  
Lymcs(Marrow)—T-lymphocytes(alpha beta TCR); num.fr. = ?

**Blood—**  
**T-lymphocytes(cytotox.);**  
**number concentration**  
**10<sup>9</sup>/litre**  
**NPU21828**  
B—T-lymphocytes(cytotox.); num.c. = ? × 10<sup>9</sup>/l

**Bone marrow—**  
**T-lymphocytes(cytotox.);**  
**number concentration**  
**10<sup>9</sup>/litre**  
**NPU21846**  
Marrow—T-lymphocytes(cytotox.); num.c. = ? × 10<sup>9</sup>/l

**Lymphocytes(Blood)—**  
**T-lymphocytes(cytotox.);**  
**number fraction**  
**NPU21790**  
Lymcs(B)—T-lymphocytes(cytotox.); num.fr. = ?

**Lymphocytes(Bone marrow)—**  
**T-lymphocytes(cytotox.);**  
**number fraction**  
**NPU21809**  
Lymcs(Marrow)—T-lymphocytes(cytotox.); num.fr. = ?

**Blood—**  
**T-lymphocytes(cytotox.; memory);**  
**number concentration**  
**10<sup>9</sup>/litre**  
**NPU21830**  
B—T-lymphocytes(cytotox.; memory); num.c. = ? × 10<sup>9</sup>/l

**Bone marrow—**  
**T-lymphocytes(cytotox.; memory);**  
**number concentration**  
**10<sup>9</sup>/litre**  
**NPU21848**  
Marrow—T-lymphocytes(cytotox.; memory); num.c. = ? × 10<sup>9</sup>/l

**Lymphocytes(Blood)—**  
**T-lymphocytes(cytotox.; memory);**  
**number fraction**  
**NPU21792**  
Lymcs(B)—T-lymphocytes(cytotox.; memory); num.fr. = ?

**Lymphocytes(Bone marrow)—**  
**T-lymphocytes(cytotox.; memory);**  
**number fraction**  
**NPU21811**  
Lymcs(Marrow)—T-lymphocytes(cytotox.; memory); num.fr. = ?

**Blood—**  
**T-lymphocytes(cytotox.; memory; Th1);**  
**number concentration**  
**10<sup>9</sup>/litre**  
**NPU21831**  
B—T-lymphocytes(cytotox.; memory; Th1); num.c. = ? × 10<sup>9</sup>/l

**Bone marrow—**  
**T-lymphocytes(cytotox.; memory; Th1);**  
**number concentration**  
**10<sup>9</sup>/litre**  
**NPU21849**  
Marrow—T-lymphocytes(cytotox.; memory; Th1); num.c. = ? × 10<sup>9</sup>/l

**Lymphocytes(Blood)—**  
**T-lymphocytes(cytotox.; memory; Th1);**  
**number fraction**  
**NPU21793**  
Lymcs(B)—T-lymphocytes(cytotox.; memory; Th1); num.fr. = ?

**Lymphocytes(Bone marrow)—**  
**T-lymphocytes(cytotox.; memory; Th1);**  
**number fraction**  
**NPU21812**  
Lymcs(Marrow)—T-lymphocytes(cytotox.; memory; Th1); num.fr. = ?

**Blood—**  
**T-lymphocytes(cytotox.; memory; Th2);**  
**number concentration**  
**10<sup>9</sup>/litre**  
**NPU21832**  
B—T-lymphocytes(cytotox.; memory; Th2); num.c. = ? × 10<sup>9</sup>/l

**Bone marrow—**  
**T-lymphocytes(cytotox.; memory; Th2);**  
**number concentration**  
**10<sup>9</sup>/litre**  
**NPU21850**  
Marrow—T-lymphocytes(cytotox.; memory; Th2); num.c. = ? × 10<sup>9</sup>/l

**Lymphocytes(Blood)—**  
**T-lymphocytes(cytotox.; memory; Th2);**  
**number fraction**  
**NPU21794**  
Lymcs(B)—T-lymphocytes(cytotox.; memory; Th2); num.fr. = ?

**Lymphocytes(Bone marrow)—**  
**T-lymphocytes(cytotox.; memory; Th2);**  
**number fraction**  
**NPU21813**  
Lymcs(Marrow)—T-lymphocytes(cytotox.; memory; Th2); num.fr. = ?

**Blood—**  
**T-lymphocytes(cytotox.; virgin);**  
**number concentration**  
**10<sup>9</sup>/litre**  
**NPU21829**  
B—T-lymphocytes(cytotox.; virgin); num.c. = ? × 10<sup>9</sup>/l

**Bone marrow—**  
**T-lymphocytes(cytotox.; virgin);**  
**number concentration**  
**10<sup>9</sup>/litre**  
**NPU21847**  
Marrow—T-lymphocytes(cytotox.; virgin); num.c. = ? × 10<sup>9</sup>/l

**Lymphocytes(Blood)—**  
**T-lymphocytes(cytotox.; virgin);**  
**number fraction**  
**NPU21791**  
Lymcs(B)—T-lymphocytes(cytotox.; virgin); num.fr. = ?

**Lymphocytes(Bone marrow)—**  
**T-lymphocytes(cytotox.; virgin);**  
**number fraction**  
**NPU21810**  
Lymcs(Marrow)—T-lymphocytes(cytotox.; virgin); num.fr. = ?

**Blood—**  
**T-lymphocytes(gamma delta TCR);**  
**number concentration**  
**10<sup>9</sup>/litre**  
**NPU21834**  
B—T-lymphocytes(gamma delta TCR); num.c. = ? × 10<sup>9</sup>/l

**Bone marrow—**  
**T-lymphocytes(gamma delta TCR);**  
**number concentration**  
**10<sup>9</sup>/litre**  
**NPU21852**  
Marrow—T-lymphocytes(gamma delta TCR); num.c. = ? × 10<sup>9</sup>/l

**Lymphocytes(Blood)—**  
**T-lymphocytes(gamma delta TCR);**  
**number fraction**  
**NPU21796**  
Lymcs(B)—T-lymphocytes(gamma delta TCR); num.fr. = ?

**Lymphocytes(Bone marrow)—**  
**T-lymphocytes(gamma delta TCR);**  
**number fraction**  
**NPU21815**  
Lymcs(Marrow)—T-lymphocytes(gamma delta TCR); num.fr. = ?

**Blood—**  
**T-lymphocytes(helper);**  
**number concentration**  
**10<sup>9</sup>/litre**  
**NPU21823**  
B—T-lymphocytes(helper); num.c. = ? × 10<sup>9</sup>/l

**Bone marrow—**  
**T-lymphocytes(helper);**  
**number concentration**  
**10<sup>9</sup>/litre**  
**NPU21841**  
Marrow—T-lymphocytes(helper); num.c. = ? × 10<sup>9</sup>/l

**Lymphocytes(Blood)—**  
**T-lymphocytes(helper);**  
**number fraction**  
**NPU21785**  
Lymcs(B)—T-lymphocytes(helper); num.fr. = ?

**Lymphocytes(Bone marrow)—**  
**T-lymphocytes(helper);**  
**number fraction**  
**NPU21804**  
Lymcs(Marrow)—T-lymphocytes(helper); num.fr. = ?

**Lymphocytes(Blood)—**  
**T-lymphocytes(helper/cytotox);**  
**numberratio**  
**NPU21856**  
Lymcs(B)—T-lymphocytes(helper/cytotox); numberratio = ?

**Blood—**  
**T-lymphocytes(helper; memory);**  
**number concentration**  
**10<sup>9</sup>/litre**  
**NPU21825**  
B—T-lymphocytes(helper; memory); num.c. = ? × 10<sup>9</sup>/l

**Bone marrow—**  
**T-lymphocytes(helper; memory);**  
**number concentration**  
**10<sup>9</sup>/litre**  
**NPU21843**  
Marrow—T-lymphocytes(helper; memory); num.c. = ? × 10<sup>9</sup>/l

**Lymphocytes(Blood)—**  
**T-lymphocytes(helper; memory);**  
**number fraction**  
**NPU21787**  
Lymcs(B)—T-lymphocytes(helper; memory); num.fr. = ?

**Lymphocytes(Bone marrow)—**  
**T-lymphocytes(helper; memory);**  
**number fraction**  
**NPU21806**  
Lymcs(Marrow)—T-lymphocytes(helper; memory); num.fr. = ?

**Blood—**  
**T-lymphocytes(helper; memory; Th1);**  
**number concentration**  
**10<sup>9</sup>/litre**  
**NPU21826**  
B—T-lymphocytes(helper; memory; Th1); num.c. = ? × 10<sup>9</sup>/l

**Bone marrow—**  
**T-lymphocytes(helper; memory; Th1);**  
**number concentration**  
**10<sup>9</sup>/litre**  
**NPU21844**  
Marrow—T-lymphocytes(helper; memory; Th1); num.c. = ? × 10<sup>9</sup>/l

**Lymphocytes(Blood)—**  
**T-lymphocytes(helper; memory; Th1);**  
**number fraction**  
**NPU21788**  
Lymcs(B)—T-lymphocytes(helper; memory; Th1); num.fr. = ?

**Lymphocytes(Bone marrow)—**  
**T-lymphocytes(helper; memory; Th1);**  
**number fraction**  
**NPU21807**  
Lymcs(Marrow)—T-lymphocytes(helper; memory; Th1); num.fr. = ?

**Blood—**  
**T-lymphocytes(helper; memory; Th2);**  
**number concentration**  
**10<sup>9</sup>/litre**  
**NPU21827**  
B—T-lymphocytes(helper; memory; Th2); num.c. = ? × 10<sup>9</sup>/l

**Bone marrow—**  
**T-lymphocytes(helper; memory; Th2);**  
**number concentration**  
**10<sup>9</sup>/litre**  
**NPU21845**  
Marrow—T-lymphocytes(helper; memory; Th2); num.c. = ? ×  
10<sup>9</sup>/l

**Lymphocytes(Blood)—**  
**T-lymphocytes(helper; memory; Th2);**  
**number fraction**  
**NPU21789**  
Lymcs(B)—T-lymphocytes(helper; memory; Th2); num.fr. = ?

**Lymphocytes(Bone marrow)—**  
**T-lymphocytes(helper; memory; Th2);**  
**number fraction**  
**NPU21808**  
Lymcs(Marrow)—T-lymphocytes(helper; memory; Th2); num.fr.  
= ?

**Blood—**  
**T-lymphocytes(helper; virgin);**  
**number concentration**  
**10<sup>9</sup>/litre**  
**NPU21824**  
B—T-lymphocytes(helper; virgin); num.c. = ? × 10<sup>9</sup>/l

**Bone marrow—**  
**T-lymphocytes(helper; virgin);**  
**number concentration**  
**10<sup>9</sup>/litre**  
**NPU21842**  
Marrow—T-lymphocytes(helper; virgin); num.c. = ? × 10<sup>9</sup>/l

**Lymphocytes(Blood)—**  
**T-lymphocytes(helper; virgin);**  
**number fraction**  
**NPU21786**  
Lymcs(B)—T-lymphocytes(helper; virgin); num.fr. = ?

**Lymphocytes(Bone marrow)—**  
**T-lymphocytes(helper; virgin);**  
**number fraction**  
**NPU21805**  
Lymcs(Marrow)—T-lymphocytes(helper; virgin); num.fr. = ?

**Lymphocytes(Blood)—**  
**T-lymphocytes;**  
**compatibility(Plasma; donationID; absent present)**  
**NPU21412**  
Lymcs(B)—T-lymphocytes; compatibility(P; donationID;  
absent present) = ?

**Blood—**  
**T-lymphocytes;**  
**number concentration**  
**10<sup>9</sup>/litre**  
**NPU21822**  
B—T-lymphocytes; num.c. = ? × 10<sup>9</sup>/l

**Bone marrow—**  
**T-lymphocytes;**  
**number concentration**  
**10<sup>9</sup>/litre**  
**NPU21840**  
Marrow—T-lymphocytes; num.c. = ? × 10<sup>9</sup>/l

**Lymphocytes(Blood)—**  
**T-lymphocytes;**  
**number fraction**  
**NPU21784**  
Lymcs(B)—T-lymphocytes; num.fr. = ?

**Lymphocytes(Bone marrow)—**  
**T-lymphocytes;**  
**number fraction**  
**NPU21803**  
Lymcs(Marrow)—T-lymphocytes; num.fr. = ?

**Culture(Lymphocytes; Blood)—**  
**Tuberculin stimulated lymphocytes;**  
**relative number concentration(stimulated/unstimulated;**  
**procedure)**  
**NPU21419**  
Culture(Lymcs; B)—Tuberculin stimulated lymphocytes;  
rel.num.c.(stim./unstim.; proc.) = ?
